# Supplementary material for: Transcriptome Analysis of Pseudomonas aeruginosa Cultured in Human Burn Wound Exudates
Source: Front Cell Infect Microbiol. 2018 Feb 27;8:39. doi: 10.3389/fcimb.2018.00039 (PMC5835353; doi:10.3389/fcimb.2018.00039)
Supplement: Supplementary Datasheet 1 — Raw data. [file DataSheet1.XLSX]

## Sheet: name.txt
chr	PseudoCAP	gene	483	2027	.	+	0	gene_id	gene134012	Alias	PA0001	name	dnaA
chr	PseudoCAP	gene	2056	3159	.	+	0	gene_id	gene134018	Alias	PA0002	name	dnaN
chr	PseudoCAP	gene	3169	4278	.	+	0	gene_id	gene134020	Alias	PA0003	name	recF
chr	PseudoCAP	gene	4275	6695	.	+	0	gene_id	gene134022	Alias	PA0004	name	gyrB
chr	PseudoCAP	gene	7018	7791	.	-	0	gene_id	gene134024	Alias	PA0005	name	lptA
chr	PseudoCAP	gene	7803	8339	.	-	0	gene_id	gene134014	Alias	PA0006	name	PA0006
chr	PseudoCAP	gene	8671	10377	.	+	0	gene_id	gene134016	Alias	PA0007	name	PA0007
chr	PseudoCAP	gene	10434	12488	.	-	0	gene_id	gene134026	Alias	PA0008	name	glyS
chr	PseudoCAP	gene	12488	13435	.	-	0	gene_id	gene134030	Alias	PA0009	name	glyQ
chr	PseudoCAP	gene	13540	14091	.	+	0	gene_id	gene134032	Alias	PA0010	name	tag
chr	PseudoCAP	gene	14235	15122	.	+	0	gene_id	gene134034	Alias	PA0011	name	PA0011
chr	PseudoCAP	gene	15207	15473	.	+	0	gene_id	gene134036	Alias	PA0012	name	PA0012
chr	PseudoCAP	gene	15620	16273	.	+	0	gene_id	gene134038	Alias	PA0013	name	PA0013
chr	PseudoCAP	gene	16335	16607	.	-	0	gene_id	gene134040	Alias	PA0014	name	PA0014
chr	PseudoCAP	gene	16900	17217	.	-	0	gene_id	gene134042	Alias	PA0015	name	PA0015
chr	PseudoCAP	gene	17366	18739	.	-	0	gene_id	gene134044	Alias	PA0016	name	trkA
chr	PseudoCAP	gene	18767	20071	.	-	0	gene_id	gene134046	Alias	PA0017	name	PA0017
chr	PseudoCAP	gene	20068	21012	.	-	0	gene_id	gene134048	Alias	PA0018	name	fmt
chr	PseudoCAP	gene	21067	21573	.	-	0	gene_id	gene134050	Alias	PA0019	name	def
chr	PseudoCAP	gene	21712	22737	.	+	0	gene_id	gene134052	Alias	PA0020	name	PA0020
chr	PseudoCAP	gene	22872	23960	.	+	0	gene_id	gene134054	Alias	PA0021	name	PA0021
chr	PseudoCAP	gene	24001	24558	.	+	0	gene_id	gene134056	Alias	PA0022	name	PA0022
chr	PseudoCAP	gene	24568	25545	.	-	0	gene_id	gene134058	Alias	PA0023	name	qor
chr	PseudoCAP	gene	25736	26653	.	+	0	gene_id	gene134060	Alias	PA0024	name	hemF
chr	PseudoCAP	gene	26711	27535	.	+	0	gene_id	gene134062	Alias	PA0025	name	aroE
chr	PseudoCAP	gene	27646	28632	.	+	0	gene_id	gene102791	Alias	PA0026	name	plcB
chr	PseudoCAP	gene	28613	29899	.	+	0	gene_id	gene102793	Alias	PA0027	name	PA0027
chr	PseudoCAP	gene	29896	30498	.	+	0	gene_id	gene102795	Alias	PA0028	name	PA0028
chr	PseudoCAP	gene	30502	32055	.	-	0	gene_id	gene102797	Alias	PA0029	name	PA0029
chr	PseudoCAP	gene	32060	32983	.	-	0	gene_id	gene102799	Alias	PA0030	name	PA0030
chr	PseudoCAP	gene	33000	34511	.	-	0	gene_id	gene102801	Alias	PA0031	name	betC
chr	PseudoCAP	gene	34624	35538	.	+	0	gene_id	gene102787	Alias	PA0032	name	PA0032
chr	PseudoCAP	gene	35905	36270	.	-	0	gene_id	gene102783	Alias	PA0033	name	hptC
chr	PseudoCAP	gene	36278	36901	.	-	0	gene_id	gene102785	Alias	PA0034	name	PA0034
chr	PseudoCAP	gene	37087	37893	.	-	0	gene_id	gene102803	Alias	PA0035	name	trpA
chr	PseudoCAP	gene	37890	39098	.	-	0	gene_id	gene102805	Alias	PA0036	name	trpB
chr	PseudoCAP	gene	39202	40089	.	+	0	gene_id	gene102807	Alias	PA0037	name	trpI
chr	PseudoCAP	gene	40190	40405	.	+	0	gene_id	gene102809	Alias	PA0038	name	PA0038
chr	PseudoCAP	gene	40589	40816	.	+	0	gene_id	gene102811	Alias	PA0039	name	PA0039
chr	PseudoCAP	gene	41113	42801	.	+	0	gene_id	gene102813	Alias	PA0040	name	PA0040
chr	PseudoCAP	gene	42914	53521	.	+	0	gene_id	gene102815	Alias	PA0041	name	PA0041
chr	PseudoCAP	gene	56546	56941	.	+	0	gene_id	gene102819	Alias	PA0042	name	PA0042
chr	PseudoCAP	gene	57212	58594	.	-	0	gene_id	gene102817	Alias	PA0043	name	PA0043
chr	PseudoCAP	gene	58786	60159	.	+	0	gene_id	gene102821	Alias	PA0044	name	exoT
chr	PseudoCAP	gene	60656	61342	.	+	0	gene_id	gene102823	Alias	PA0045	name	PA0045
chr	PseudoCAP	gene	61373	61726	.	+	0	gene_id	gene102825	Alias	PA0046	name	PA0046
chr	PseudoCAP	gene	61879	62388	.	+	0	gene_id	gene102827	Alias	PA0047	name	PA0047
chr	PseudoCAP	gene	62403	62786	.	-	0	gene_id	gene102829	Alias	PA0048	name	PA0048
chr	PseudoCAP	gene	63068	64729	.	-	0	gene_id	gene102831	Alias	PA0049	name	PA0049
chr	PseudoCAP	gene	65339	65479	.	+	0	gene_id	gene102833	Alias	PA0050	name	PA0050
chr	PseudoCAP	gene	66303	68135	.	+	0	gene_id	gene102835	Alias	PA0051	name	phzH
chr	PseudoCAP	gene	68188	68616	.	-	0	gene_id	gene102837	Alias	PA0052	name	PA0052
chr	PseudoCAP	gene	69272	69526	.	+	0	gene_id	gene102839	Alias	PA0053	name	PA0053
chr	PseudoCAP	gene	69543	70091	.	-	0	gene_id	gene102841	Alias	PA0054	name	PA0054
chr	PseudoCAP	gene	70130	70636	.	-	0	gene_id	gene102843	Alias	PA0055	name	PA0055
chr	PseudoCAP	gene	70702	71622	.	-	0	gene_id	gene102845	Alias	PA0056	name	PA0056
chr	PseudoCAP	gene	71730	72617	.	+	0	gene_id	gene102847	Alias	PA0057	name	PA0057
chr	PseudoCAP	gene	72680	73384	.	+	0	gene_id	gene102849	Alias	PA0058	name	dsbM
chr	PseudoCAP	gene	73468	73923	.	+	0	gene_id	gene102851	Alias	PA0059	name	osmC
chr	PseudoCAP	gene	74034	74267	.	+	0	gene_id	gene102853	Alias	PA0060	name	PA0060
chr	PseudoCAP	gene	74279	74716	.	-	0	gene_id	gene102855	Alias	PA0061	name	PA0061
chr	PseudoCAP	gene	74773	75189	.	-	0	gene_id	gene102857	Alias	PA0062	name	PA0062
chr	PseudoCAP	gene	75281	76408	.	+	0	gene_id	gene102859	Alias	PA0063	name	PA0063
chr	PseudoCAP	gene	76416	77399	.	-	0	gene_id	gene102861	Alias	PA0064	name	PA0064
chr	PseudoCAP	gene	77432	78097	.	-	0	gene_id	gene102863	Alias	PA0065	name	PA0065
chr	PseudoCAP	gene	78090	78632	.	-	0	gene_id	gene102865	Alias	PA0066	name	PA0066
chr	PseudoCAP	gene	78710	80755	.	+	0	gene_id	gene102867	Alias	PA0067	name	prlC
chr	PseudoCAP	gene	80752	81027	.	+	0	gene_id	gene102869	Alias	PA0068	name	PA0068
chr	PseudoCAP	gene	81116	82174	.	+	0	gene_id	gene102871	Alias	PA0069	name	PA0069
chr	PseudoCAP	gene	82404	83318	.	-	0	gene_id	gene102873	Alias	PA0070	name	tagQ1
chr	PseudoCAP	gene	83380	85092	.	-	0	gene_id	gene102875	Alias	PA0071	name	tagR1
chr	PseudoCAP	gene	85085	86284	.	-	0	gene_id	gene102877	Alias	PA0072	name	tagS1
chr	PseudoCAP	gene	86284	87003	.	-	0	gene_id	gene102879	Alias	PA0073	name	tagT1
chr	PseudoCAP	gene	87000	90098	.	-	0	gene_id	gene102881	Alias	PA0074	name	ppkA
chr	PseudoCAP	gene	90106	90834	.	-	0	gene_id	gene102883	Alias	PA0075	name	pppA
chr	PseudoCAP	gene	90844	91524	.	-	0	gene_id	gene102885	Alias	PA0076	name	tagF1
chr	PseudoCAP	gene	91521	94826	.	-	0	gene_id	gene102887	Alias	PA0077	name	icmF1
chr	PseudoCAP	gene	95048	96397	.	-	0	gene_id	gene102889	Alias	PA0078	name	tssL1
chr	PseudoCAP	gene	96404	97738	.	-	0	gene_id	gene102891	Alias	PA0079	name	tssK1
chr	PseudoCAP	gene	97754	98218	.	-	0	gene_id	gene102893	Alias	PA0080	name	tssJ1
chr	PseudoCAP	gene	98263	99756	.	-	0	gene_id	gene102895	Alias	PA0081	name	fha1
chr	PseudoCAP	gene	100124	101158	.	+	0	gene_id	gene102897	Alias	PA0082	name	tssA1
chr	PseudoCAP	gene	101247	101765	.	+	0	gene_id	gene102899	Alias	PA0083	name	tssB1
chr	PseudoCAP	gene	101778	103274	.	+	0	gene_id	gene102901	Alias	PA0084	name	tssC1
chr	PseudoCAP	gene	103350	103838	.	+	0	gene_id	gene102903	Alias	PA0085	name	hcp1
chr	PseudoCAP	gene	104006	104851	.	+	0	gene_id	gene102905	Alias	PA0086	name	tagJ1
chr	PseudoCAP	gene	104853	105362	.	+	0	gene_id	gene102907	Alias	PA0087	name	tssE1
chr	PseudoCAP	gene	105359	107218	.	+	0	gene_id	gene102909	Alias	PA0088	name	tssF1
chr	PseudoCAP	gene	107182	108228	.	+	0	gene_id	gene102911	Alias	PA0089	name	tssG1
chr	PseudoCAP	gene	108221	110929	.	+	0	gene_id	gene102913	Alias	PA0090	name	clpV1
chr	PseudoCAP	gene	110976	112907	.	+	0	gene_id	gene102915	Alias	PA0091	name	vgrG1
chr	PseudoCAP	gene	113022	113306	.	-	0	gene_id	gene102917	Alias	PA0092	name	PA0092
chr	PseudoCAP	gene	113303	114595	.	-	0	gene_id	gene102919	Alias	PA0093	name	PA0093
chr	PseudoCAP	gene	114611	115045	.	-	0	gene_id	gene102921	Alias	PA0094	name	PA0094
chr	PseudoCAP	gene	115299	117524	.	+	0	gene_id	gene102923	Alias	PA0095	name	PA0095
chr	PseudoCAP	gene	117552	118001	.	+	0	gene_id	gene102925	Alias	PA0096	name	PA0096
chr	PseudoCAP	gene	117931	119130	.	+	0	gene_id	gene102927	Alias	PA0097	name	PA0097
chr	PseudoCAP	gene	119127	120164	.	+	0	gene_id	gene102929	Alias	PA0098	name	PA0098
chr	PseudoCAP	gene	120164	121324	.	+	0	gene_id	gene102931	Alias	PA0099	name	PA0099
chr	PseudoCAP	gene	121346	122266	.	+	0	gene_id	gene102933	Alias	PA0100	name	PA0100
chr	PseudoCAP	gene	122248	123495	.	+	0	gene_id	gene102935	Alias	PA0101	name	PA0101
chr	PseudoCAP	gene	123871	124599	.	+	0	gene_id	gene102937	Alias	PA0102	name	PA0102
chr	PseudoCAP	gene	124810	126381	.	+	0	gene_id	gene102939	Alias	PA0103	name	PA0103
chr	PseudoCAP	gene	126518	127114	.	+	0	gene_id	gene102941	Alias	PA0104	name	PA0104
chr	PseudoCAP	gene	127378	128502	.	+	0	gene_id	gene102943	Alias	PA0105	name	coxB
chr	PseudoCAP	gene	128512	130104	.	+	0	gene_id	gene102945	Alias	PA0106	name	coxA
chr	PseudoCAP	gene	130115	130669	.	+	0	gene_id	gene102947	Alias	PA0107	name	PA0107
chr	PseudoCAP	gene	130680	131567	.	+	0	gene_id	gene102949	Alias	PA0108	name	coIII
chr	PseudoCAP	gene	131583	131792	.	-	0	gene_id	gene102951	Alias	PA0109	name	PA0109
chr	PseudoCAP	gene	131808	132602	.	+	0	gene_id	gene102953	Alias	PA0110	name	PA0110
chr	PseudoCAP	gene	132577	133155	.	+	0	gene_id	gene102955	Alias	PA0111	name	PA0111
chr	PseudoCAP	gene	133220	134293	.	+	0	gene_id	gene102957	Alias	PA0112	name	PA0112
chr	PseudoCAP	gene	134319	135233	.	+	0	gene_id	gene102959	Alias	PA0113	name	PA0113
chr	PseudoCAP	gene	135259	135894	.	+	0	gene_id	gene102961	Alias	PA0114	name	senC
chr	PseudoCAP	gene	135934	136386	.	-	0	gene_id	gene102963	Alias	PA0115	name	PA0115
chr	PseudoCAP	gene	136518	136991	.	+	0	gene_id	gene102965	Alias	PA0116	name	PA0116
chr	PseudoCAP	gene	137248	137976	.	+	0	gene_id	gene102967	Alias	PA0117	name	PA0117
chr	PseudoCAP	gene	138001	138588	.	+	0	gene_id	gene102969	Alias	PA0118	name	PA0118
chr	PseudoCAP	gene	138818	140167	.	+	0	gene_id	gene102971	Alias	PA0119	name	PA0119
chr	PseudoCAP	gene	140216	140902	.	+	0	gene_id	gene102973	Alias	PA0120	name	PA0120
chr	PseudoCAP	gene	141003	141737	.	+	0	gene_id	gene102975	Alias	PA0121	name	PA0121
chr	PseudoCAP	gene	141917	142327	.	+	0	gene_id	gene102977	Alias	PA0122	name	rahU
chr	PseudoCAP	gene	142359	143267	.	-	0	gene_id	gene102979	Alias	PA0123	name	PA0123
chr	PseudoCAP	gene	143567	143848	.	-	0	gene_id	gene102981	Alias	PA0124	name	PA0124
chr	PseudoCAP	gene	143845	144072	.	-	0	gene_id	gene102983	Alias	PA0125	name	PA0125
chr	PseudoCAP	gene	144248	144868	.	-	0	gene_id	gene102985	Alias	PA0126	name	PA0126
chr	PseudoCAP	gene	144969	145469	.	+	0	gene_id	gene102987	Alias	PA0127	name	PA0127
chr	PseudoCAP	gene	145542	145883	.	+	0	gene_id	gene102989	Alias	PA0128	name	PA0128
chr	PseudoCAP	gene	145965	147392	.	-	0	gene_id	gene102991	Alias	PA0129	name	bauD
chr	PseudoCAP	gene	147561	149054	.	-	0	gene_id	gene102993	Alias	PA0130	name	bauC
chr	PseudoCAP	gene	149138	149425	.	-	0	gene_id	gene102995	Alias	PA0131	name	bauB
chr	PseudoCAP	gene	149425	150771	.	-	0	gene_id	gene102997	Alias	PA0132	name	bauA
chr	PseudoCAP	gene	150906	151823	.	+	0	gene_id	gene102999	Alias	PA0133	name	bauR
chr	PseudoCAP	gene	151936	153306	.	-	0	gene_id	gene103001	Alias	PA0134	name	PA0134
chr	PseudoCAP	gene	153696	153836	.	+	0	gene_id	gene103003	Alias	PA0135	name	PA0135
chr	PseudoCAP	gene	154417	155988	.	+	0	gene_id	gene103005	Alias	PA0136	name	PA0136
chr	PseudoCAP	gene	155988	157085	.	+	0	gene_id	gene103007	Alias	PA0137	name	PA0137
chr	PseudoCAP	gene	157108	158034	.	+	0	gene_id	gene103009	Alias	PA0138	name	PA0138
chr	PseudoCAP	gene	158199	158762	.	+	0	gene_id	gene103011	Alias	PA0139	name	ahpC
chr	PseudoCAP	gene	158907	160472	.	+	0	gene_id	gene103013	Alias	PA0140	name	ahpF
chr	PseudoCAP	gene	160552	161448	.	-	0	gene_id	gene103015	Alias	PA0141	name	PA0141
chr	PseudoCAP	gene	161906	163255	.	+	0	gene_id	gene103017	Alias	PA0142	name	PA0142
chr	PseudoCAP	gene	163363	164415	.	+	0	gene_id	gene103019	Alias	PA0143	name	nuh
chr	PseudoCAP	gene	164443	165069	.	-	0	gene_id	gene103021	Alias	PA0144	name	PA0144
chr	PseudoCAP	gene	165219	165737	.	-	0	gene_id	gene103023	Alias	PA0145	name	PA0145
chr	PseudoCAP	gene	165976	167073	.	+	0	gene_id	gene103025	Alias	PA0146	name	PA0146
chr	PseudoCAP	gene	167146	168108	.	+	0	gene_id	gene103027	Alias	PA0147	name	PA0147
chr	PseudoCAP	gene	168213	169163	.	+	0	gene_id	gene103029	Alias	PA0148	name	PA0148
chr	PseudoCAP	gene	169361	169906	.	+	0	gene_id	gene103031	Alias	PA0149	name	PA0149
chr	PseudoCAP	gene	169903	170898	.	+	0	gene_id	gene103033	Alias	PA0150	name	PA0150
chr	PseudoCAP	gene	171047	173434	.	+	0	gene_id	gene103035	Alias	PA0151	name	PA0151
chr	PseudoCAP	gene	173811	174638	.	+	0	gene_id	gene103037	Alias	PA0152	name	pcaQ
chr	PseudoCAP	gene	174773	175492	.	+	0	gene_id	gene103039	Alias	PA0153	name	pcaH
chr	PseudoCAP	gene	175503	176108	.	+	0	gene_id	gene103041	Alias	PA0154	name	pcaG
chr	PseudoCAP	gene	176315	177154	.	+	0	gene_id	gene103043	Alias	PA0155	name	pcaR
chr	PseudoCAP	gene	177307	178458	.	+	0	gene_id	gene103045	Alias	PA0156	name	triA
chr	PseudoCAP	gene	178455	179525	.	+	0	gene_id	gene103047	Alias	PA0157	name	triB
chr	PseudoCAP	gene	179522	182569	.	+	0	gene_id	gene103049	Alias	PA0158	name	triC
chr	PseudoCAP	gene	182768	183706	.	+	0	gene_id	gene103051	Alias	PA0159	name	PA0159
chr	PseudoCAP	gene	183822	184007	.	+	0	gene_id	gene103053	Alias	PA0160	name	PA0160
chr	PseudoCAP	gene	184287	184439	.	+	0	gene_id	gene103055	Alias	PA0161	name	PA0161
chr	PseudoCAP	gene	184594	185928	.	+	0	gene_id	gene103057	Alias	PA0162	name	opdC
chr	PseudoCAP	gene	185957	186754	.	-	0	gene_id	gene103059	Alias	PA0163	name	PA0163
chr	PseudoCAP	gene	186832	188448	.	+	0	gene_id	gene103061	Alias	PA0164	name	PA0164
chr	PseudoCAP	gene	189120	189956	.	+	0	gene_id	gene103063	Alias	PA0165	name	PA0165
chr	PseudoCAP	gene	190198	191604	.	+	0	gene_id	gene103065	Alias	PA0166	name	PA0166
chr	PseudoCAP	gene	191697	192362	.	+	0	gene_id	gene103067	Alias	PA0167	name	PA0167
chr	PseudoCAP	gene	192368	192958	.	+	0	gene_id	gene103069	Alias	PA0168	name	PA0168
chr	PseudoCAP	gene	192965	193672	.	-	0	gene_id	gene103071	Alias	PA0169	name	siaD
chr	PseudoCAP	gene	193799	194179	.	-	0	gene_id	gene103073	Alias	PA0170	name	PA0170
chr	PseudoCAP	gene	194206	194748	.	-	0	gene_id	gene103075	Alias	PA0171	name	PA0171
chr	PseudoCAP	gene	194757	196748	.	-	0	gene_id	gene103077	Alias	PA0172	name	siaA
chr	PseudoCAP	gene	197011	198060	.	-	0	gene_id	gene103079	Alias	PA0173	name	PA0173
chr	PseudoCAP	gene	198080	198682	.	-	0	gene_id	gene103081	Alias	PA0174	name	PA0174
chr	PseudoCAP	gene	198688	199530	.	-	0	gene_id	gene103083	Alias	PA0175	name	PA0175
chr	PseudoCAP	gene	199600	201639	.	-	0	gene_id	gene103085	Alias	PA0176	name	aer2
chr	PseudoCAP	gene	201675	202160	.	-	0	gene_id	gene103087	Alias	PA0177	name	PA0177
chr	PseudoCAP	gene	202147	204066	.	-	0	gene_id	gene103089	Alias	PA0178	name	PA0178
chr	PseudoCAP	gene	204094	204459	.	-	0	gene_id	gene103091	Alias	PA0179	name	PA0179
chr	PseudoCAP	gene	204657	205829	.	-	0	gene_id	gene103093	Alias	PA0180	name	cttP
chr	PseudoCAP	gene	206022	206954	.	-	0	gene_id	gene103095	Alias	PA0181	name	PA0181
chr	PseudoCAP	gene	207071	207823	.	+	0	gene_id	gene103097	Alias	PA0182	name	PA0182
chr	PseudoCAP	gene	207923	209533	.	-	0	gene_id	gene103099	Alias	PA0183	name	atsA
chr	PseudoCAP	gene	209621	210460	.	-	0	gene_id	gene103101	Alias	PA0184	name	PA0184
chr	PseudoCAP	gene	210457	212073	.	-	0	gene_id	gene103103	Alias	PA0185	name	PA0185
chr	PseudoCAP	gene	212340	213401	.	+	0	gene_id	gene103105	Alias	PA0186	name	PA0186
chr	PseudoCAP	gene	213819	214634	.	+	0	gene_id	gene103107	Alias	PA0187	name	PA0187
chr	PseudoCAP	gene	214631	215512	.	+	0	gene_id	gene103109	Alias	PA0188	name	PA0188
chr	PseudoCAP	gene	215550	216908	.	-	0	gene_id	gene103111	Alias	PA0189	name	PA0189
chr	PseudoCAP	gene	217156	217881	.	+	0	gene_id	gene103113	Alias	PA0190	name	PA0190
chr	PseudoCAP	gene	217905	218822	.	-	0	gene_id	gene103115	Alias	PA0191	name	PA0191
chr	PseudoCAP	gene	219172	221544	.	+	0	gene_id	gene103117	Alias	PA0192	name	PA0192
chr	PseudoCAP	gene	221585	222487	.	+	0	gene_id	gene103119	Alias	PA0193	name	PA0193
chr	PseudoCAP	gene	222555	223454	.	+	0	gene_id	gene103121	Alias	PA0194	name	PA0194
chr	PseudoCAP	gene	224101	225217	.	+	0	gene_id	gene103123	Alias	PA0195	name	pntAA
chr	PseudoCAP	gene	225295	225603	.	+	0	gene_id	gene103125	Alias	PA0195.1	name	pntAB
chr	PseudoCAP	gene	225603	227039	.	+	0	gene_id	gene103127	Alias	PA0196	name	pntB
chr	PseudoCAP	gene	227382	228194	.	+	0	gene_id	gene103129	Alias	PA0197	name	tonB2
chr	PseudoCAP	gene	228223	228942	.	+	0	gene_id	gene103131	Alias	PA0198	name	exbB1
chr	PseudoCAP	gene	228944	229345	.	+	0	gene_id	gene103133	Alias	PA0199	name	exbD1
chr	PseudoCAP	gene	229526	229738	.	-	0	gene_id	gene103135	Alias	PA0200	name	PA0200
chr	PseudoCAP	gene	229954	230535	.	+	0	gene_id	gene103137	Alias	PA0201	name	PA0201
chr	PseudoCAP	gene	230543	232000	.	-	0	gene_id	gene103139	Alias	PA0202	name	PA0202
chr	PseudoCAP	gene	232066	233100	.	-	0	gene_id	gene103141	Alias	PA0203	name	PA0203
chr	PseudoCAP	gene	233123	233932	.	-	0	gene_id	gene103143	Alias	PA0204	name	PA0204
chr	PseudoCAP	gene	233929	234849	.	-	0	gene_id	gene103145	Alias	PA0205	name	PA0205
chr	PseudoCAP	gene	234875	235987	.	-	0	gene_id	gene103147	Alias	PA0206	name	PA0206
chr	PseudoCAP	gene	236218	237111	.	+	0	gene_id	gene103149	Alias	PA0207	name	PA0207
chr	PseudoCAP	gene	237232	238896	.	+	0	gene_id	gene103151	Alias	PA0208	name	mdcA
chr	PseudoCAP	gene	238896	239777	.	+	0	gene_id	gene103153	Alias	PA0209	name	PA0209
chr	PseudoCAP	gene	239779	240078	.	+	0	gene_id	gene103155	Alias	PA0210	name	mdcC
chr	PseudoCAP	gene	240071	240934	.	+	0	gene_id	gene103157	Alias	PA0211	name	mdcD
chr	PseudoCAP	gene	240931	241737	.	+	0	gene_id	gene103159	Alias	PA0212	name	mdcE
chr	PseudoCAP	gene	241753	242445	.	+	0	gene_id	gene103161	Alias	PA0213	name	PA0213
chr	PseudoCAP	gene	242442	243374	.	+	0	gene_id	gene103163	Alias	PA0214	name	PA0214
chr	PseudoCAP	gene	243431	243835	.	+	0	gene_id	gene103165	Alias	PA0215	name	PA0215
chr	PseudoCAP	gene	243841	244605	.	+	0	gene_id	gene103167	Alias	PA0216	name	PA0216
chr	PseudoCAP	gene	244690	245619	.	-	0	gene_id	gene103169	Alias	PA0217	name	PA0217
chr	PseudoCAP	gene	245948	246868	.	-	0	gene_id	gene103171	Alias	PA0218	name	PA0218
chr	PseudoCAP	gene	247219	248709	.	+	0	gene_id	gene103173	Alias	PA0219	name	PA0219
chr	PseudoCAP	gene	248767	250200	.	+	0	gene_id	gene103175	Alias	PA0220	name	PA0220
chr	PseudoCAP	gene	250231	251613	.	+	0	gene_id	gene103177	Alias	PA0221	name	PA0221
chr	PseudoCAP	gene	251777	252835	.	+	0	gene_id	gene103179	Alias	PA0222	name	PA0222
chr	PseudoCAP	gene	252913	253794	.	-	0	gene_id	gene103181	Alias	PA0223	name	PA0223
chr	PseudoCAP	gene	253854	254636	.	-	0	gene_id	gene103183	Alias	PA0224	name	PA0224
chr	PseudoCAP	gene	254791	255330	.	+	0	gene_id	gene103185	Alias	PA0225	name	PA0225
chr	PseudoCAP	gene	255481	256332	.	+	0	gene_id	gene103187	Alias	PA0226	name	PA0226
chr	PseudoCAP	gene	256329	257111	.	+	0	gene_id	gene103189	Alias	PA0227	name	PA0227
chr	PseudoCAP	gene	257108	258313	.	+	0	gene_id	gene103191	Alias	PA0228	name	pcaF
chr	PseudoCAP	gene	258463	259761	.	+	0	gene_id	gene103193	Alias	PA0229	name	pcaT
chr	PseudoCAP	gene	259784	261163	.	+	0	gene_id	gene103195	Alias	PA0230	name	pcaB
chr	PseudoCAP	gene	261179	261970	.	+	0	gene_id	gene103197	Alias	PA0231	name	pcaD
chr	PseudoCAP	gene	261981	262382	.	+	0	gene_id	gene103199	Alias	PA0232	name	pcaC
chr	PseudoCAP	gene	262557	263498	.	+	0	gene_id	gene103201	Alias	PA0233	name	PA0233
chr	PseudoCAP	gene	263689	264522	.	+	0	gene_id	gene103203	Alias	PA0234	name	PA0234
chr	PseudoCAP	gene	264964	266310	.	-	0	gene_id	gene103205	Alias	PA0235	name	pcaK
chr	PseudoCAP	gene	266616	267395	.	+	0	gene_id	gene103207	Alias	PA0236	name	PA0236
chr	PseudoCAP	gene	267638	268681	.	+	0	gene_id	gene103209	Alias	PA0237	name	PA0237
chr	PseudoCAP	gene	268704	269519	.	+	0	gene_id	gene103211	Alias	PA0238	name	PA0238
chr	PseudoCAP	gene	269669	270547	.	+	0	gene_id	gene103213	Alias	PA0239	name	PA0239
chr	PseudoCAP	gene	270573	271838	.	-	0	gene_id	gene103215	Alias	PA0240	name	PA0240
chr	PseudoCAP	gene	271904	273229	.	-	0	gene_id	gene103217	Alias	PA0241	name	PA0241
chr	PseudoCAP	gene	273775	275679	.	+	0	gene_id	gene103219	Alias	PA0242	name	PA0242
chr	PseudoCAP	gene	275772	276440	.	+	0	gene_id	gene103221	Alias	PA0243	name	PA0243
chr	PseudoCAP	gene	276480	277334	.	-	0	gene_id	gene103223	Alias	PA0244	name	PA0244
chr	PseudoCAP	gene	277331	277777	.	-	0	gene_id	gene103225	Alias	PA0245	name	aroQ2
chr	PseudoCAP	gene	277894	279399	.	-	0	gene_id	gene103227	Alias	PA0246	name	PA0246
chr	PseudoCAP	gene	279574	280758	.	-	0	gene_id	gene103229	Alias	PA0247	name	pobA
chr	PseudoCAP	gene	280936	281802	.	+	0	gene_id	gene103231	Alias	PA0248	name	PA0248
chr	PseudoCAP	gene	281799	282245	.	-	0	gene_id	gene103233	Alias	PA0249	name	PA0249
chr	PseudoCAP	gene	282323	282757	.	-	0	gene_id	gene103235	Alias	PA0250	name	PA0250
chr	PseudoCAP	gene	282912	283553	.	-	0	gene_id	gene103237	Alias	PA0251	name	PA0251
chr	PseudoCAP	gene	283818	284105	.	-	0	gene_id	gene103239	Alias	PA0252	name	PA0252
chr	PseudoCAP	gene	284197	284673	.	-	0	gene_id	gene103241	Alias	PA0253	name	hudR
chr	PseudoCAP	gene	284714	286204	.	-	0	gene_id	gene103243	Alias	PA0254	name	hudA
chr	PseudoCAP	gene	286338	287024	.	-	0	gene_id	gene103245	Alias	PA0255	name	PA0255
chr	PseudoCAP	gene	287188	288120	.	-	0	gene_id	gene103247	Alias	PA0256	name	PA0256
chr	PseudoCAP	gene	288384	289175	.	-	0	gene_id	gene103249	Alias	PA0257	name	PA0257
chr	PseudoCAP	gene	289205	289390	.	-	0	gene_id	gene103251	Alias	PA0258	name	PA0258
chr	PseudoCAP	gene	289562	291004	.	-	0	gene_id	gene103253	Alias	PA0259	name	PA0259
chr	PseudoCAP	gene	291154	293304	.	-	0	gene_id	gene103255	Alias	PA0260	name	PA0260
chr	PseudoCAP	gene	293301	293798	.	-	0	gene_id	gene103257	Alias	PA0261	name	PA0261
chr	PseudoCAP	gene	293802	296861	.	-	0	gene_id	gene103259	Alias	PA0262	name	PA0262
chr	PseudoCAP	gene	297043	297561	.	-	0	gene_id	gene103261	Alias	PA0263	name	hcpC
chr	PseudoCAP	gene	298816	298892	.	-	0	gene_id	gene103263	Alias	PA0263.1	name	PA0263.1
chr	PseudoCAP	gene	299081	299497	.	-	0	gene_id	gene103265	Alias	PA0264	name	PA0264
chr	PseudoCAP	gene	299522	300973	.	+	0	gene_id	gene103267	Alias	PA0265	name	gabD
chr	PseudoCAP	gene	301218	302498	.	+	0	gene_id	gene103269	Alias	PA0266	name	gabT
chr	PseudoCAP	gene	302824	304023	.	+	0	gene_id	gene103271	Alias	PA0267	name	PA0267
chr	PseudoCAP	gene	304177	305598	.	-	0	gene_id	gene103273	Alias	PA0268	name	PA0268
chr	PseudoCAP	gene	305725	306162	.	+	0	gene_id	gene103275	Alias	PA0269	name	PA0269
chr	PseudoCAP	gene	306174	306581	.	+	0	gene_id	gene103277	Alias	PA0270	name	PA0270
chr	PseudoCAP	gene	306615	306899	.	+	0	gene_id	gene103279	Alias	PA0271	name	PA0271
chr	PseudoCAP	gene	306896	307828	.	-	0	gene_id	gene103281	Alias	PA0272	name	PA0272
chr	PseudoCAP	gene	307878	309092	.	-	0	gene_id	gene103283	Alias	PA0273	name	PA0273
chr	PseudoCAP	gene	309255	310025	.	-	0	gene_id	gene103285	Alias	PA0274	name	PA0274
chr	PseudoCAP	gene	310134	310820	.	-	0	gene_id	gene103287	Alias	PA0275	name	PA0275
chr	PseudoCAP	gene	310896	311411	.	+	0	gene_id	gene103289	Alias	PA0276	name	PA0276
chr	PseudoCAP	gene	311451	312209	.	-	0	gene_id	gene103291	Alias	PA0277	name	PA0277
chr	PseudoCAP	gene	312381	313133	.	-	0	gene_id	gene103293	Alias	PA0278	name	PA0278
chr	PseudoCAP	gene	313227	313925	.	+	0	gene_id	gene103295	Alias	PA0279	name	PA0279
chr	PseudoCAP	gene	313938	314927	.	-	0	gene_id	gene103297	Alias	PA0280	name	cysA
chr	PseudoCAP	gene	314931	315800	.	-	0	gene_id	gene103299	Alias	PA0281	name	cysW
chr	PseudoCAP	gene	315811	316629	.	-	0	gene_id	gene103301	Alias	PA0282	name	cysT
chr	PseudoCAP	gene	316791	317789	.	-	0	gene_id	gene103303	Alias	PA0283	name	sbp
chr	PseudoCAP	gene	317966	318148	.	-	0	gene_id	gene103305	Alias	PA0284	name	PA0284
chr	PseudoCAP	gene	318312	320594	.	-	0	gene_id	gene103307	Alias	PA0285	name	PA0285
chr	PseudoCAP	gene	320766	321944	.	+	0	gene_id	gene103309	Alias	PA0286	name	desA
chr	PseudoCAP	gene	322175	323560	.	+	0	gene_id	gene103311	Alias	PA0287	name	gpuP
chr	PseudoCAP	gene	323616	324572	.	+	0	gene_id	gene103313	Alias	PA0288	name	gpuA
chr	PseudoCAP	gene	324625	325587	.	+	0	gene_id	gene103315	Alias	PA0289	name	gpuR
chr	PseudoCAP	gene	325700	326671	.	+	0	gene_id	gene103317	Alias	PA0290	name	PA0290
chr	PseudoCAP	gene	327284	328666	.	+	0	gene_id	gene103319	Alias	PA0291	name	oprE
chr	PseudoCAP	gene	328801	329907	.	-	0	gene_id	gene103321	Alias	PA0292	name	aguA
chr	PseudoCAP	gene	329993	330871	.	-	0	gene_id	gene103323	Alias	PA0293	name	aguB
chr	PseudoCAP	gene	331034	331699	.	-	0	gene_id	gene103325	Alias	PA0294	name	aguR
chr	PseudoCAP	gene	331762	332823	.	-	0	gene_id	gene103327	Alias	PA0295	name	PA0295
chr	PseudoCAP	gene	333079	334455	.	-	0	gene_id	gene103329	Alias	PA0296	name	spuI
chr	PseudoCAP	gene	334734	335486	.	+	0	gene_id	gene103331	Alias	PA0297	name	spuA
chr	PseudoCAP	gene	335527	336885	.	+	0	gene_id	gene103333	Alias	PA0298	name	spuB
chr	PseudoCAP	gene	336951	338321	.	+	0	gene_id	gene103335	Alias	PA0299	name	spuC
chr	PseudoCAP	gene	338437	339540	.	+	0	gene_id	gene103337	Alias	PA0300	name	spuD
chr	PseudoCAP	gene	339959	341056	.	+	0	gene_id	gene103339	Alias	PA0301	name	spuE
chr	PseudoCAP	gene	341111	342265	.	+	0	gene_id	gene103341	Alias	PA0302	name	spuF
chr	PseudoCAP	gene	342292	343173	.	+	0	gene_id	gene103343	Alias	PA0303	name	spuG
chr	PseudoCAP	gene	343256	344125	.	+	0	gene_id	gene103345	Alias	PA0304	name	spuH
chr	PseudoCAP	gene	344303	346690	.	-	0	gene_id	gene103347	Alias	PA0305	name	hacB
chr	PseudoCAP	gene	346801	347853	.	+	0	gene_id	gene103349	Alias	PA0306	name	PA0306
chr	PseudoCAP	gene	348440	349051	.	-	0	gene_id	gene103351	Alias	PA0307	name	PA0307
chr	PseudoCAP	gene	349050	350069	.	+	0	gene_id	gene103353	Alias	PA0308	name	PA0308
chr	PseudoCAP	gene	350089	350841	.	-	0	gene_id	gene103355	Alias	PA0309	name	PA0309
chr	PseudoCAP	gene	350890	351588	.	+	0	gene_id	gene103357	Alias	PA0310	name	PA0310
chr	PseudoCAP	gene	351610	352164	.	-	0	gene_id	gene103359	Alias	PA0311	name	PA0311
chr	PseudoCAP	gene	352430	352924	.	+	0	gene_id	gene103361	Alias	PA0312	name	PA0312
chr	PseudoCAP	gene	352927	353619	.	-	0	gene_id	gene103363	Alias	PA0313	name	PA0313
chr	PseudoCAP	gene	353691	354461	.	-	0	gene_id	gene103365	Alias	PA0314	name	PA0314
chr	PseudoCAP	gene	354754	355191	.	+	0	gene_id	gene103367	Alias	PA0315	name	PA0315
chr	PseudoCAP	gene	355248	356477	.	-	0	gene_id	gene103369	Alias	PA0316	name	serA
chr	PseudoCAP	gene	356681	358075	.	+	0	gene_id	gene103371	Alias	PA0317	name	PA0317
chr	PseudoCAP	gene	358167	358832	.	+	0	gene_id	gene103373	Alias	PA0318	name	PA0318
chr	PseudoCAP	gene	358931	359920	.	+	0	gene_id	gene103375	Alias	PA0319	name	PA0319
chr	PseudoCAP	gene	359982	360332	.	+	0	gene_id	gene103377	Alias	PA0320	name	PA0320
chr	PseudoCAP	gene	360413	361447	.	-	0	gene_id	gene103379	Alias	PA0321	name	PA0321
chr	PseudoCAP	gene	361463	362857	.	-	0	gene_id	gene103381	Alias	PA0322	name	PA0322
chr	PseudoCAP	gene	363278	364321	.	-	0	gene_id	gene103383	Alias	PA0323	name	PA0323
chr	PseudoCAP	gene	364369	365157	.	-	0	gene_id	gene103385	Alias	PA0324	name	PA0324
chr	PseudoCAP	gene	365154	366083	.	-	0	gene_id	gene103387	Alias	PA0325	name	PA0325
chr	PseudoCAP	gene	366080	367129	.	-	0	gene_id	gene103389	Alias	PA0326	name	PA0326
chr	PseudoCAP	gene	367457	368422	.	+	0	gene_id	gene103391	Alias	PA0327	name	PA0327
chr	PseudoCAP	gene	368462	370405	.	-	0	gene_id	gene103393	Alias	PA0328	name	aaaA
chr	PseudoCAP	gene	370706	371038	.	-	0	gene_id	gene103395	Alias	PA0329	name	PA0329
chr	PseudoCAP	gene	371162	371833	.	-	0	gene_id	gene103397	Alias	PA0330	name	rpiA
chr	PseudoCAP	gene	372091	373605	.	+	0	gene_id	gene103399	Alias	PA0331	name	ilvA1
chr	PseudoCAP	gene	373725	374192	.	+	0	gene_id	gene103401	Alias	PA0332	name	PA0332
chr	PseudoCAP	gene	374243	375514	.	+	0	gene_id	gene103403	Alias	PA0333	name	PA0333
chr	PseudoCAP	gene	375951	377189	.	-	0	gene_id	gene103405	Alias	PA0334	name	PA0334
chr	PseudoCAP	gene	377239	377892	.	-	0	gene_id	gene103407	Alias	PA0335	name	PA0335
chr	PseudoCAP	gene	378096	378575	.	+	0	gene_id	gene103409	Alias	PA0336	name	ygdP
chr	PseudoCAP	gene	378598	380877	.	+	0	gene_id	gene103411	Alias	PA0337	name	ptsP
chr	PseudoCAP	gene	380903	382033	.	+	0	gene_id	gene103413	Alias	PA0338	name	PA0338
chr	PseudoCAP	gene	382037	382792	.	-	0	gene_id	gene103415	Alias	PA0339	name	PA0339
chr	PseudoCAP	gene	382914	383717	.	+	0	gene_id	gene103417	Alias	PA0340	name	PA0340
chr	PseudoCAP	gene	383727	384527	.	+	0	gene_id	gene103419	Alias	PA0341	name	lgt
chr	PseudoCAP	gene	384733	385527	.	+	0	gene_id	gene103421	Alias	PA0342	name	thyA
chr	PseudoCAP	gene	385554	386351	.	-	0	gene_id	gene103423	Alias	PA0343	name	PA0343
chr	PseudoCAP	gene	386386	387765	.	-	0	gene_id	gene103425	Alias	PA0344	name	PA0344
chr	PseudoCAP	gene	387758	389143	.	-	0	gene_id	gene103427	Alias	PA0345	name	PA0345
chr	PseudoCAP	gene	389334	389696	.	+	0	gene_id	gene103429	Alias	PA0346	name	PA0346
chr	PseudoCAP	gene	389733	390884	.	-	0	gene_id	gene103431	Alias	PA0347	name	glpQ
chr	PseudoCAP	gene	391094	392188	.	+	0	gene_id	gene103433	Alias	PA0348	name	PA0348
chr	PseudoCAP	gene	392185	393225	.	+	0	gene_id	gene103435	Alias	PA0349	name	PA0349
chr	PseudoCAP	gene	393308	393814	.	+	0	gene_id	gene103437	Alias	PA0350	name	folA
chr	PseudoCAP	gene	393830	394303	.	-	0	gene_id	gene103439	Alias	PA0351	name	PA0351
chr	PseudoCAP	gene	394442	395827	.	-	0	gene_id	gene103441	Alias	PA0352	name	PA0352
chr	PseudoCAP	gene	396057	397895	.	-	0	gene_id	gene103443	Alias	PA0353	name	ilvD
chr	PseudoCAP	gene	398224	399420	.	-	0	gene_id	gene103445	Alias	PA0354	name	PA0354
chr	PseudoCAP	gene	399493	400032	.	-	0	gene_id	gene103447	Alias	PA0355	name	pfpI
chr	PseudoCAP	gene	400248	401072	.	+	0	gene_id	gene103449	Alias	PA0356	name	PA0356
chr	PseudoCAP	gene	401131	401943	.	+	0	gene_id	gene103451	Alias	PA0357	name	mutY
chr	PseudoCAP	gene	402020	402598	.	+	0	gene_id	gene103453	Alias	PA0358	name	PA0358
chr	PseudoCAP	gene	402681	403025	.	+	0	gene_id	gene103455	Alias	PA0359	name	PA0359
chr	PseudoCAP	gene	403295	404281	.	+	0	gene_id	gene103457	Alias	PA0360	name	PA0360
chr	PseudoCAP	gene	404386	406119	.	-	0	gene_id	gene103459	Alias	PA0361	name	PA0361
chr	PseudoCAP	gene	406247	406498	.	-	0	gene_id	gene103461	Alias	PA0362	name	fdx1
chr	PseudoCAP	gene	406619	407098	.	-	0	gene_id	gene103463	Alias	PA0363	name	coaD
chr	PseudoCAP	gene	407250	408845	.	-	0	gene_id	gene103465	Alias	PA0364	name	PA0364
chr	PseudoCAP	gene	408901	409449	.	-	0	gene_id	gene103467	Alias	PA0365	name	PA0365
chr	PseudoCAP	gene	409504	410934	.	-	0	gene_id	gene103469	Alias	PA0366	name	PA0366
chr	PseudoCAP	gene	411224	411871	.	+	0	gene_id	gene103471	Alias	PA0367	name	PA0367
chr	PseudoCAP	gene	412329	413327	.	-	0	gene_id	gene103473	Alias	PA0368	name	PA0368
chr	PseudoCAP	gene	413364	413654	.	-	0	gene_id	gene103475	Alias	PA0369	name	PA0369
chr	PseudoCAP	gene	413933	414529	.	-	0	gene_id	gene103477	Alias	PA0370	name	PA0370
chr	PseudoCAP	gene	414529	416016	.	-	0	gene_id	gene103479	Alias	PA0371	name	PA0371
chr	PseudoCAP	gene	416009	417406	.	-	0	gene_id	gene103481	Alias	PA0372	name	PA0372
chr	PseudoCAP	gene	417527	418894	.	+	0	gene_id	gene103483	Alias	PA0373	name	ftsY
chr	PseudoCAP	gene	418891	419562	.	+	0	gene_id	gene103485	Alias	PA0374	name	ftsE
chr	PseudoCAP	gene	419562	420569	.	+	0	gene_id	gene103487	Alias	PA0375	name	ftsX
chr	PseudoCAP	gene	420683	421537	.	+	0	gene_id	gene103489	Alias	PA0376	name	rpoH
chr	PseudoCAP	gene	421602	422207	.	+	0	gene_id	gene103491	Alias	PA0377	name	PA0377
chr	PseudoCAP	gene	422212	422943	.	-	0	gene_id	gene103493	Alias	PA0378	name	PA0378
chr	PseudoCAP	gene	422980	423357	.	+	0	gene_id	gene103495	Alias	PA0379	name	PA0379
chr	PseudoCAP	gene	423460	423660	.	+	0	gene_id	gene103497	Alias	PA0380	name	PA0380
chr	PseudoCAP	gene	423719	424516	.	+	0	gene_id	gene103499	Alias	PA0381	name	thiG
chr	PseudoCAP	gene	424670	425341	.	+	0	gene_id	gene103501	Alias	PA0382	name	micA
chr	PseudoCAP	gene	425504	426850	.	+	0	gene_id	gene103503	Alias	PA0383	name	PA0383
chr	PseudoCAP	gene	426863	427120	.	-	0	gene_id	gene103505	Alias	PA0384	name	PA0384
chr	PseudoCAP	gene	427182	427505	.	-	0	gene_id	gene103507	Alias	PA0385	name	PA0385
chr	PseudoCAP	gene	427586	428740	.	-	0	gene_id	gene103509	Alias	PA0386	name	PA0386
chr	PseudoCAP	gene	428861	429454	.	-	0	gene_id	gene103511	Alias	PA0387	name	PA0387
chr	PseudoCAP	gene	429451	429870	.	-	0	gene_id	gene103513	Alias	PA0388	name	PA0388
chr	PseudoCAP	gene	430002	430622	.	-	0	gene_id	gene103515	Alias	PA0389	name	PA0389
chr	PseudoCAP	gene	430630	431769	.	-	0	gene_id	gene103517	Alias	PA0390	name	metX
chr	PseudoCAP	gene	431858	433825	.	-	0	gene_id	gene103519	Alias	PA0391	name	PA0391
chr	PseudoCAP	gene	434226	434819	.	-	0	gene_id	gene103521	Alias	PA0392	name	PA0392
chr	PseudoCAP	gene	434830	435651	.	-	0	gene_id	gene103523	Alias	PA0393	name	proC
chr	PseudoCAP	gene	435663	436355	.	-	0	gene_id	gene103525	Alias	PA0394	name	PA0394
chr	PseudoCAP	gene	436570	437604	.	+	0	gene_id	gene103527	Alias	PA0395	name	pilT
chr	PseudoCAP	gene	437782	438930	.	+	0	gene_id	gene103529	Alias	PA0396	name	pilU
chr	PseudoCAP	gene	438938	439837	.	-	0	gene_id	gene103531	Alias	PA0397	name	PA0397
chr	PseudoCAP	gene	439991	440395	.	+	0	gene_id	gene103533	Alias	PA0398	name	PA0398
chr	PseudoCAP	gene	440638	442011	.	+	0	gene_id	gene103535	Alias	PA0399	name	PA0399
chr	PseudoCAP	gene	442008	443192	.	+	0	gene_id	gene103537	Alias	PA0400	name	PA0400
chr	PseudoCAP	gene	443419	444690	.	-	0	gene_id	gene103539	Alias	PA0401	name	PA0401
chr	PseudoCAP	gene	444687	445691	.	-	0	gene_id	gene103541	Alias	PA0402	name	pyrB
chr	PseudoCAP	gene	445715	446227	.	-	0	gene_id	gene103543	Alias	PA0403	name	pyrR
chr	PseudoCAP	gene	446339	446773	.	-	0	gene_id	gene103545	Alias	PA0404	name	PA0404
chr	PseudoCAP	gene	446773	447342	.	-	0	gene_id	gene103547	Alias	PA0405	name	PA0405
chr	PseudoCAP	gene	447391	448350	.	-	0	gene_id	gene103549	Alias	PA0406	name	tonB3
chr	PseudoCAP	gene	448431	449384	.	-	0	gene_id	gene103551	Alias	PA0407	name	gshB
chr	PseudoCAP	gene	449639	450046	.	+	0	gene_id	gene103553	Alias	PA0408	name	pilG
chr	PseudoCAP	gene	450093	450458	.	+	0	gene_id	gene103555	Alias	PA0409	name	pilH
chr	PseudoCAP	gene	450509	451045	.	+	0	gene_id	gene103557	Alias	PA0410	name	pilI
chr	PseudoCAP	gene	451130	453178	.	+	0	gene_id	gene103559	Alias	PA0411	name	pilJ
chr	PseudoCAP	gene	453239	454114	.	+	0	gene_id	gene103561	Alias	PA0412	name	pilK
chr	PseudoCAP	gene	454126	461544	.	+	0	gene_id	gene103563	Alias	PA0413	name	chpA
chr	PseudoCAP	gene	461537	462568	.	+	0	gene_id	gene103565	Alias	PA0414	name	chpB
chr	PseudoCAP	gene	462565	463071	.	+	0	gene_id	gene103567	Alias	PA0415	name	chpC
chr	PseudoCAP	gene	463079	463873	.	+	0	gene_id	gene103569	Alias	PA0416	name	chpD
chr	PseudoCAP	gene	463949	464560	.	+	0	gene_id	gene103571	Alias	PA0417	name	chpE
chr	PseudoCAP	gene	464568	465983	.	-	0	gene_id	gene103573	Alias	PA0418	name	PA0418
chr	PseudoCAP	gene	466018	466740	.	-	0	gene_id	gene103575	Alias	PA0419	name	PA0419
chr	PseudoCAP	gene	466833	468236	.	-	0	gene_id	gene103577	Alias	PA0420	name	bioA
chr	PseudoCAP	gene	468410	469900	.	+	0	gene_id	gene103579	Alias	PA0421	name	PA0421
chr	PseudoCAP	gene	470081	470650	.	+	0	gene_id	gene103581	Alias	PA0422	name	PA0422
chr	PseudoCAP	gene	470662	471237	.	+	0	gene_id	gene103583	Alias	PA0423	name	pasP
chr	PseudoCAP	gene	471306	471749	.	-	0	gene_id	gene103585	Alias	PA0424	name	mexR
chr	PseudoCAP	gene	472024	473175	.	+	0	gene_id	gene103587	Alias	PA0425	name	mexA
chr	PseudoCAP	gene	473191	476331	.	+	0	gene_id	gene103589	Alias	PA0426	name	mexB
chr	PseudoCAP	gene	476333	477790	.	+	0	gene_id	gene103591	Alias	PA0427	name	oprM
chr	PseudoCAP	gene	477886	479805	.	-	0	gene_id	gene103593	Alias	PA0428	name	PA0428
chr	PseudoCAP	gene	480056	481126	.	-	0	gene_id	gene103595	Alias	PA0429	name	PA0429
chr	PseudoCAP	gene	481196	482068	.	-	0	gene_id	gene103597	Alias	PA0430	name	metF
chr	PseudoCAP	gene	482111	482665	.	-	0	gene_id	gene103599	Alias	PA0431	name	PA0431
chr	PseudoCAP	gene	482706	484115	.	-	0	gene_id	gene103601	Alias	PA0432	name	sahH
chr	PseudoCAP	gene	484404	484838	.	+	0	gene_id	gene103603	Alias	PA0433	name	PA0433
chr	PseudoCAP	gene	484964	487156	.	+	0	gene_id	gene103605	Alias	PA0434	name	PA0434
chr	PseudoCAP	gene	487167	488645	.	+	0	gene_id	gene103607	Alias	PA0435	name	PA0435
chr	PseudoCAP	gene	488730	489350	.	+	0	gene_id	gene103609	Alias	PA0436	name	PA0436
chr	PseudoCAP	gene	489387	490658	.	-	0	gene_id	gene103611	Alias	PA0437	name	codA
chr	PseudoCAP	gene	490648	491898	.	-	0	gene_id	gene103613	Alias	PA0438	name	codB
chr	PseudoCAP	gene	492080	493357	.	-	0	gene_id	gene103615	Alias	PA0439	name	PA0439
chr	PseudoCAP	gene	493354	494721	.	-	0	gene_id	gene103617	Alias	PA0440	name	PA0440
chr	PseudoCAP	gene	494816	496255	.	-	0	gene_id	gene103619	Alias	PA0441	name	dht
chr	PseudoCAP	gene	496362	496478	.	-	0	gene_id	gene103621	Alias	PA0442	name	PA0442
chr	PseudoCAP	gene	496871	498361	.	+	0	gene_id	gene103623	Alias	PA0443	name	PA0443
chr	PseudoCAP	gene	498420	499703	.	+	0	gene_id	gene103625	Alias	PA0444	name	PA0444
chr	PseudoCAP	gene	500104	501120	.	-	0	gene_id	gene103627	Alias	PA0445	name	PA0445
chr	PseudoCAP	gene	501376	502599	.	-	0	gene_id	gene103629	Alias	PA0446	name	PA0446
chr	PseudoCAP	gene	502719	503900	.	-	0	gene_id	gene103631	Alias	PA0447	name	gcdH
chr	PseudoCAP	gene	504121	505029	.	+	0	gene_id	gene103633	Alias	PA0448	name	PA0448
chr	PseudoCAP	gene	505047	505586	.	+	0	gene_id	gene103635	Alias	PA0449	name	PA0449
chr	PseudoCAP	gene	505629	507251	.	-	0	gene_id	gene103637	Alias	PA0450	name	PA0450
chr	PseudoCAP	gene	507631	508962	.	+	0	gene_id	gene103639	Alias	PA0451	name	PA0451
chr	PseudoCAP	gene	508959	509753	.	+	0	gene_id	gene103641	Alias	PA0452	name	PA0452
chr	PseudoCAP	gene	509825	510499	.	-	0	gene_id	gene103643	Alias	PA0453	name	PA0453
chr	PseudoCAP	gene	510589	512790	.	-	0	gene_id	gene103645	Alias	PA0454	name	PA0454
chr	PseudoCAP	gene	513051	514427	.	-	0	gene_id	gene103647	Alias	PA0455	name	dbpA
chr	PseudoCAP	gene	514775	514984	.	+	0	gene_id	gene103649	Alias	PA0456	name	PA0456
chr	PseudoCAP	gene	515135	515659	.	+	0	gene_id	gene103651	Alias	PA0457	name	PA0457
chr	PseudoCAP	gene	515653	516027	.	-	0	gene_id	gene267066	Alias	PA0457.1	name	PA0457.1
chr	PseudoCAP	gene	516029	517462	.	-	0	gene_id	gene103653	Alias	PA0458	name	PA0458
chr	PseudoCAP	gene	518083	520635	.	+	0	gene_id	gene103655	Alias	PA0459	name	PA0459
chr	PseudoCAP	gene	520737	521315	.	+	0	gene_id	gene103657	Alias	PA0460	name	PA0460
chr	PseudoCAP	gene	521630	522517	.	-	0	gene_id	gene103659	Alias	PA0461	name	PA0461
chr	PseudoCAP	gene	522465	523169	.	+	0	gene_id	gene103661	Alias	PA0462	name	PA0462
chr	PseudoCAP	gene	523254	523943	.	+	0	gene_id	gene103663	Alias	PA0463	name	creB
chr	PseudoCAP	gene	523943	525367	.	+	0	gene_id	gene103665	Alias	PA0464	name	creC
chr	PseudoCAP	gene	525469	526827	.	+	0	gene_id	gene103667	Alias	PA0465	name	creD
chr	PseudoCAP	gene	526877	527179	.	+	0	gene_id	gene103669	Alias	PA0466	name	PA0466
chr	PseudoCAP	gene	527324	527944	.	-	0	gene_id	gene103671	Alias	PA0467	name	PA0467
chr	PseudoCAP	gene	527963	528913	.	-	0	gene_id	gene103673	Alias	PA0468	name	PA0468
chr	PseudoCAP	gene	528999	529856	.	+	0	gene_id	gene103675	Alias	PA0469	name	PA0469
chr	PseudoCAP	gene	530029	532437	.	-	0	gene_id	gene103677	Alias	PA0470	name	fiuA
chr	PseudoCAP	gene	532541	533512	.	-	0	gene_id	gene103679	Alias	PA0471	name	PA0471
chr	PseudoCAP	gene	533509	534027	.	-	0	gene_id	gene103681	Alias	PA0472	name	fiuI
chr	PseudoCAP	gene	534196	534945	.	+	0	gene_id	gene103683	Alias	PA0473	name	PA0473
chr	PseudoCAP	gene	535085	535489	.	+	0	gene_id	gene103685	Alias	PA0474	name	PA0474
chr	PseudoCAP	gene	535539	536108	.	+	0	gene_id	gene103687	Alias	PA0475	name	PA0475
chr	PseudoCAP	gene	536142	537869	.	-	0	gene_id	gene103689	Alias	PA0476	name	PA0476
chr	PseudoCAP	gene	538217	539143	.	-	0	gene_id	gene103691	Alias	PA0477	name	PA0477
chr	PseudoCAP	gene	539231	539707	.	+	0	gene_id	gene103693	Alias	PA0478	name	PA0478
chr	PseudoCAP	gene	539785	540735	.	-	0	gene_id	gene103695	Alias	PA0479	name	PA0479
chr	PseudoCAP	gene	540839	541636	.	+	0	gene_id	gene103697	Alias	PA0480	name	PA0480
chr	PseudoCAP	gene	541679	542122	.	+	0	gene_id	gene103699	Alias	PA0481	name	PA0481
chr	PseudoCAP	gene	542170	544347	.	-	0	gene_id	gene103701	Alias	PA0482	name	glcB
chr	PseudoCAP	gene	544654	545097	.	+	0	gene_id	gene103703	Alias	PA0483	name	PA0483
chr	PseudoCAP	gene	545129	545644	.	+	0	gene_id	gene103705	Alias	PA0484	name	PA0484
chr	PseudoCAP	gene	546334	547230	.	-	0	gene_id	gene103707	Alias	PA0485	name	PA0485
chr	PseudoCAP	gene	547432	548406	.	-	0	gene_id	gene103709	Alias	PA0486	name	PA0486
chr	PseudoCAP	gene	548468	549226	.	-	0	gene_id	gene103711	Alias	PA0487	name	PA0487
chr	PseudoCAP	gene	549294	549614	.	-	0	gene_id	gene103713	Alias	PA0488	name	PA0488
chr	PseudoCAP	gene	549656	550381	.	-	0	gene_id	gene103715	Alias	PA0489	name	PA0489
chr	PseudoCAP	gene	550520	550813	.	-	0	gene_id	gene103717	Alias	PA0490	name	PA0490
chr	PseudoCAP	gene	550867	551793	.	-	0	gene_id	gene103719	Alias	PA0491	name	PA0491
chr	PseudoCAP	gene	551911	552669	.	+	0	gene_id	gene103721	Alias	PA0492	name	PA0492
chr	PseudoCAP	gene	552746	552994	.	+	0	gene_id	gene103723	Alias	PA0493	name	PA0493
chr	PseudoCAP	gene	553005	554381	.	+	0	gene_id	gene103725	Alias	PA0494	name	PA0494
chr	PseudoCAP	gene	554383	555261	.	+	0	gene_id	gene103727	Alias	PA0495	name	PA0495
chr	PseudoCAP	gene	555251	556228	.	+	0	gene_id	gene103729	Alias	PA0496	name	PA0496
chr	PseudoCAP	gene	556275	557276	.	-	0	gene_id	gene103731	Alias	PA0497	name	PA0497
chr	PseudoCAP	gene	557354	558361	.	-	0	gene_id	gene103733	Alias	PA0498	name	PA0498
chr	PseudoCAP	gene	558377	559078	.	-	0	gene_id	gene103735	Alias	PA0499	name	PA0499
chr	PseudoCAP	gene	559644	560702	.	+	0	gene_id	gene103737	Alias	PA0500	name	bioB
chr	PseudoCAP	gene	560808	562013	.	+	0	gene_id	gene103739	Alias	PA0501	name	bioF
chr	PseudoCAP	gene	562006	562728	.	+	0	gene_id	gene103741	Alias	PA0502	name	PA0502
chr	PseudoCAP	gene	562721	563545	.	+	0	gene_id	gene103743	Alias	PA0503	name	PA0503
chr	PseudoCAP	gene	563549	564235	.	+	0	gene_id	gene103745	Alias	PA0504	name	bioD
chr	PseudoCAP	gene	564344	564574	.	+	0	gene_id	gene103747	Alias	PA0505	name	PA0505
chr	PseudoCAP	gene	564914	566719	.	+	0	gene_id	gene103749	Alias	PA0506	name	PA0506
chr	PseudoCAP	gene	566932	568728	.	+	0	gene_id	gene103751	Alias	PA0507	name	PA0507
chr	PseudoCAP	gene	569002	570780	.	+	0	gene_id	gene103753	Alias	PA0508	name	PA0508
chr	PseudoCAP	gene	571111	572592	.	-	0	gene_id	gene103755	Alias	PA0509	name	nirN
chr	PseudoCAP	gene	572583	573422	.	-	0	gene_id	gene103757	Alias	PA0510	name	PA0510
chr	PseudoCAP	gene	573433	574596	.	-	0	gene_id	gene103759	Alias	PA0511	name	nirJ
chr	PseudoCAP	gene	574590	575105	.	-	0	gene_id	gene103761	Alias	PA0512	name	PA0512
chr	PseudoCAP	gene	575080	575523	.	-	0	gene_id	gene103763	Alias	PA0513	name	PA0513
chr	PseudoCAP	gene	575516	576040	.	-	0	gene_id	gene103765	Alias	PA0514	name	nirL
chr	PseudoCAP	gene	576037	576489	.	-	0	gene_id	gene103767	Alias	PA0515	name	PA0515
chr	PseudoCAP	gene	576498	577676	.	-	0	gene_id	gene103769	Alias	PA0516	name	nirF
chr	PseudoCAP	gene	577673	578032	.	-	0	gene_id	gene103771	Alias	PA0517	name	nirC
chr	PseudoCAP	gene	578029	578343	.	-	0	gene_id	gene103773	Alias	PA0518	name	nirM
chr	PseudoCAP	gene	578394	580100	.	-	0	gene_id	gene103775	Alias	PA0519	name	nirS
chr	PseudoCAP	gene	580316	581098	.	+	0	gene_id	gene103777	Alias	PA0520	name	nirQ
chr	PseudoCAP	gene	581133	581660	.	+	0	gene_id	gene103779	Alias	PA0521	name	PA0521
chr	PseudoCAP	gene	581668	581925	.	+	0	gene_id	gene103781	Alias	PA0522	name	PA0522
chr	PseudoCAP	gene	582015	582455	.	+	0	gene_id	gene103783	Alias	PA0523	name	norC
chr	PseudoCAP	gene	582455	583855	.	+	0	gene_id	gene103785	Alias	PA0524	name	norB
chr	PseudoCAP	gene	583857	585695	.	+	0	gene_id	gene103787	Alias	PA0525	name	PA0525
chr	PseudoCAP	gene	585702	585896	.	-	0	gene_id	gene103789	Alias	PA0526	name	PA0526
chr	PseudoCAP	gene	585980	586663	.	-	0	gene_id	gene103791	Alias	PA0527	name	dnr
chr	PseudoCAP	gene	586867	586990	.	+	0	gene_id	gene160433	Alias	PA0527.1	name	rsmY
chr	PseudoCAP	gene	587017	587895	.	-	0	gene_id	gene103793	Alias	PA0528	name	PA0528
chr	PseudoCAP	gene	587997	588698	.	+	0	gene_id	gene103795	Alias	PA0529	name	PA0529
chr	PseudoCAP	gene	588924	590105	.	+	0	gene_id	gene103797	Alias	PA0530	name	PA0530
chr	PseudoCAP	gene	590105	590821	.	+	0	gene_id	gene103799	Alias	PA0531	name	PA0531
chr	PseudoCAP	gene	590896	591402	.	-	0	gene_id	gene103801	Alias	PA0532	name	PA0532
chr	PseudoCAP	gene	591445	592935	.	+	0	gene_id	gene103803	Alias	PA0533	name	PA0533
chr	PseudoCAP	gene	593273	594562	.	+	0	gene_id	gene103805	Alias	PA0534	name	pauB1
chr	PseudoCAP	gene	594580	595134	.	+	0	gene_id	gene103807	Alias	PA0535	name	PA0535
chr	PseudoCAP	gene	595245	596270	.	-	0	gene_id	gene103809	Alias	PA0536	name	PA0536
chr	PseudoCAP	gene	596274	596882	.	-	0	gene_id	gene103811	Alias	PA0537	name	PA0537
chr	PseudoCAP	gene	596970	597479	.	-	0	gene_id	gene103813	Alias	PA0538	name	dsbB
chr	PseudoCAP	gene	597708	598538	.	+	0	gene_id	gene103815	Alias	PA0539	name	PA0539
chr	PseudoCAP	gene	598608	598994	.	+	0	gene_id	gene103817	Alias	PA0540	name	PA0540
chr	PseudoCAP	gene	599107	599565	.	+	0	gene_id	gene103819	Alias	PA0541	name	PA0541
chr	PseudoCAP	gene	599757	600176	.	-	0	gene_id	gene103821	Alias	PA0542	name	PA0542
chr	PseudoCAP	gene	600426	601394	.	+	0	gene_id	gene103823	Alias	PA0543	name	PA0543
chr	PseudoCAP	gene	601398	602141	.	-	0	gene_id	gene103825	Alias	PA0544	name	PA0544
chr	PseudoCAP	gene	602346	603650	.	+	0	gene_id	gene103827	Alias	PA0545	name	PA0545
chr	PseudoCAP	gene	603706	604896	.	-	0	gene_id	gene103829	Alias	PA0546	name	metK
chr	PseudoCAP	gene	604912	605913	.	-	0	gene_id	gene103831	Alias	PA0547	name	PA0547
chr	PseudoCAP	gene	606160	608157	.	+	0	gene_id	gene103833	Alias	PA0548	name	tktA
chr	PseudoCAP	gene	608157	609221	.	+	0	gene_id	gene103835	Alias	PA0549	name	PA0549
chr	PseudoCAP	gene	609202	609999	.	-	0	gene_id	gene103837	Alias	PA0550	name	PA0550
chr	PseudoCAP	gene	610214	611275	.	+	0	gene_id	gene103839	Alias	PA0551	name	epd
chr	PseudoCAP	gene	611281	612444	.	+	0	gene_id	gene103841	Alias	PA0552	name	pgk
chr	PseudoCAP	gene	612517	612717	.	+	0	gene_id	gene103843	Alias	PA0553	name	PA0553
chr	PseudoCAP	gene	612877	613218	.	+	0	gene_id	gene103845	Alias	PA0554	name	PA0554
chr	PseudoCAP	gene	613338	614402	.	+	0	gene_id	gene103847	Alias	PA0555	name	fda
chr	PseudoCAP	gene	614468	614950	.	+	0	gene_id	gene103849	Alias	PA0556	name	PA0556
chr	PseudoCAP	gene	614952	615608	.	-	0	gene_id	gene103851	Alias	PA0557	name	PA0557
chr	PseudoCAP	gene	615607	616374	.	+	0	gene_id	gene103853	Alias	PA0558	name	PA0558
chr	PseudoCAP	gene	616371	617549	.	-	0	gene_id	gene103855	Alias	PA0559	name	PA0559
chr	PseudoCAP	gene	617662	618150	.	+	0	gene_id	gene103857	Alias	PA0560	name	PA0560
chr	PseudoCAP	gene	618176	619330	.	+	0	gene_id	gene103859	Alias	PA0561	name	PA0561
chr	PseudoCAP	gene	619332	620006	.	-	0	gene_id	gene103861	Alias	PA0562	name	PA0562
chr	PseudoCAP	gene	620135	620488	.	-	0	gene_id	gene103863	Alias	PA0563	name	PA0563
chr	PseudoCAP	gene	620666	621577	.	-	0	gene_id	gene103865	Alias	PA0564	name	PA0564
chr	PseudoCAP	gene	621695	622033	.	+	0	gene_id	gene103867	Alias	PA0565	name	PA0565
chr	PseudoCAP	gene	622023	622538	.	-	0	gene_id	gene103869	Alias	PA0566	name	PA0566
chr	PseudoCAP	gene	622726	622884	.	+	0	gene_id	gene103871	Alias	PA0567	name	PA0567
chr	PseudoCAP	gene	622894	623352	.	-	0	gene_id	gene103873	Alias	PA0568	name	PA0568
chr	PseudoCAP	gene	623368	623838	.	-	0	gene_id	gene103875	Alias	PA0569	name	PA0569
chr	PseudoCAP	gene	623852	624199	.	-	0	gene_id	gene103877	Alias	PA0570	name	PA0570
chr	PseudoCAP	gene	624189	624803	.	-	0	gene_id	gene103879	Alias	PA0571	name	PA0571
chr	PseudoCAP	gene	624994	627765	.	-	0	gene_id	gene103881	Alias	PA0572	name	PA0572
chr	PseudoCAP	gene	628335	628670	.	-	0	gene_id	gene103883	Alias	PA0573	name	PA0573
chr	PseudoCAP	gene	628763	629884	.	-	0	gene_id	gene103885	Alias	PA0574	name	PA0574
chr	PseudoCAP	gene	630434	630510	.	-	0	gene_id	gene103887	Alias	PA0574.1	name	PA0574.1
chr	PseudoCAP	gene	630527	634264	.	-	0	gene_id	gene103889	Alias	PA0575	name	PA0575
chr	PseudoCAP	gene	634371	636224	.	-	0	gene_id	gene103891	Alias	PA0576	name	rpoD
chr	PseudoCAP	gene	636304	638298	.	-	0	gene_id	gene103893	Alias	PA0577	name	dnaG
chr	PseudoCAP	gene	638381	638830	.	-	0	gene_id	gene103895	Alias	PA0578	name	PA0578
chr	PseudoCAP	gene	638900	639115	.	-	0	gene_id	gene103897	Alias	PA0579	name	rpsU
chr	PseudoCAP	gene	639316	640341	.	+	0	gene_id	gene103899	Alias	PA0580	name	gcp
chr	PseudoCAP	gene	640420	640989	.	-	0	gene_id	gene103901	Alias	PA0581	name	PA0581
chr	PseudoCAP	gene	641073	641426	.	+	0	gene_id	gene103903	Alias	PA0582	name	folB
chr	PseudoCAP	gene	641417	641959	.	+	0	gene_id	gene103905	Alias	PA0583	name	PA0583
chr	PseudoCAP	gene	641932	643164	.	-	0	gene_id	gene103907	Alias	PA0584	name	cca
chr	PseudoCAP	gene	643208	643714	.	-	0	gene_id	gene103909	Alias	PA0585	name	PA0585
chr	PseudoCAP	gene	643808	645361	.	-	0	gene_id	gene103911	Alias	PA0586	name	PA0586
chr	PseudoCAP	gene	645358	646629	.	-	0	gene_id	gene103913	Alias	PA0587	name	PA0587
chr	PseudoCAP	gene	646730	648652	.	-	0	gene_id	gene103915	Alias	PA0588	name	PA0588
chr	PseudoCAP	gene	648931	649263	.	-	0	gene_id	gene103917	Alias	PA0589	name	PA0589
chr	PseudoCAP	gene	649307	650158	.	-	0	gene_id	gene103919	Alias	PA0590	name	apaH
chr	PseudoCAP	gene	650158	650538	.	-	0	gene_id	gene103921	Alias	PA0591	name	PA0591
chr	PseudoCAP	gene	650575	651381	.	-	0	gene_id	gene103923	Alias	PA0592	name	ksgA
chr	PseudoCAP	gene	651497	652483	.	-	0	gene_id	gene103925	Alias	PA0593	name	pdxA
chr	PseudoCAP	gene	652480	653772	.	-	0	gene_id	gene103927	Alias	PA0594	name	surA
chr	PseudoCAP	gene	653753	656527	.	-	0	gene_id	gene103929	Alias	PA0595	name	ostA
chr	PseudoCAP	gene	656654	657670	.	+	0	gene_id	gene103931	Alias	PA0596	name	PA0596
chr	PseudoCAP	gene	657667	658341	.	+	0	gene_id	gene103933	Alias	PA0597	name	PA0597
chr	PseudoCAP	gene	658343	659101	.	+	0	gene_id	gene103935	Alias	PA0598	name	PA0598
chr	PseudoCAP	gene	659102	660163	.	-	0	gene_id	gene103937	Alias	PA0599	name	PA0599
chr	PseudoCAP	gene	660315	662708	.	+	0	gene_id	gene103939	Alias	PA0600	name	agtS
chr	PseudoCAP	gene	662754	663386	.	+	0	gene_id	gene103941	Alias	PA0601	name	agtR
chr	PseudoCAP	gene	663515	664549	.	+	0	gene_id	gene103943	Alias	PA0602	name	PA0602
chr	PseudoCAP	gene	664783	665892	.	+	0	gene_id	gene103945	Alias	PA0603	name	agtA
chr	PseudoCAP	gene	665948	666994	.	+	0	gene_id	gene103947	Alias	PA0604	name	agtB
chr	PseudoCAP	gene	667108	668355	.	+	0	gene_id	gene103949	Alias	PA0605	name	agtC
chr	PseudoCAP	gene	668461	669291	.	+	0	gene_id	gene103951	Alias	PA0606	name	agtD
chr	PseudoCAP	gene	669415	670089	.	+	0	gene_id	gene103953	Alias	PA0607	name	rpe
chr	PseudoCAP	gene	670089	670907	.	+	0	gene_id	gene103955	Alias	PA0608	name	PA0608
chr	PseudoCAP	gene	670980	672458	.	+	0	gene_id	gene103957	Alias	PA0609	name	trpE
chr	PseudoCAP	gene	672777	673091	.	-	0	gene_id	gene103959	Alias	PA0610	name	prtN
chr	PseudoCAP	gene	673191	673961	.	-	0	gene_id	gene103961	Alias	PA0611	name	prtR
chr	PseudoCAP	gene	674419	674619	.	+	0	gene_id	gene103963	Alias	PA0612	name	ptrB
chr	PseudoCAP	gene	674667	675026	.	+	0	gene_id	gene103965	Alias	PA0613	name	PA0613
chr	PseudoCAP	gene	675390	675839	.	+	0	gene_id	gene103967	Alias	PA0614	name	PA0614
chr	PseudoCAP	gene	675861	676376	.	+	0	gene_id	gene103969	Alias	PA0615	name	PA0615
chr	PseudoCAP	gene	676373	676930	.	+	0	gene_id	gene103971	Alias	PA0616	name	PA0616
chr	PseudoCAP	gene	677083	677409	.	+	0	gene_id	gene103973	Alias	PA0617	name	PA0617
chr	PseudoCAP	gene	677406	678293	.	+	0	gene_id	gene103975	Alias	PA0618	name	PA0618
chr	PseudoCAP	gene	678286	678819	.	+	0	gene_id	gene103977	Alias	PA0619	name	PA0619
chr	PseudoCAP	gene	678821	680896	.	+	0	gene_id	gene103979	Alias	PA0620	name	PA0620
chr	PseudoCAP	gene	680893	681351	.	+	0	gene_id	gene103981	Alias	PA0621	name	PA0621
chr	PseudoCAP	gene	681394	682554	.	+	0	gene_id	gene103983	Alias	PA0622	name	PA0622
chr	PseudoCAP	gene	682567	683070	.	+	0	gene_id	gene103985	Alias	PA0623	name	PA0623
chr	PseudoCAP	gene	683085	683429	.	+	0	gene_id	gene103987	Alias	PA0624	name	PA0624
chr	PseudoCAP	gene	683599	685836	.	+	0	gene_id	gene103989	Alias	PA0625	name	PA0625
chr	PseudoCAP	gene	685846	686718	.	+	0	gene_id	gene103991	Alias	PA0626	name	PA0626
chr	PseudoCAP	gene	686693	686899	.	+	0	gene_id	gene103993	Alias	PA0627	name	PA0627
chr	PseudoCAP	gene	686957	687946	.	+	0	gene_id	gene103995	Alias	PA0628	name	PA0628
chr	PseudoCAP	gene	687979	688608	.	+	0	gene_id	gene103997	Alias	PA0629	name	PA0629
chr	PseudoCAP	gene	688605	688967	.	+	0	gene_id	gene103999	Alias	PA0630	name	PA0630
chr	PseudoCAP	gene	688964	689221	.	+	0	gene_id	gene104001	Alias	PA0631	name	PA0631
chr	PseudoCAP	gene	689236	689466	.	+	0	gene_id	gene104003	Alias	PA0632	name	PA0632
chr	PseudoCAP	gene	689537	690031	.	+	0	gene_id	gene104005	Alias	PA0633	name	PA0633
chr	PseudoCAP	gene	690043	690390	.	+	0	gene_id	gene104007	Alias	PA0634	name	PA0634
chr	PseudoCAP	gene	690420	690674	.	+	0	gene_id	gene104009	Alias	PA0635	name	PA0635
chr	PseudoCAP	gene	690721	692556	.	+	0	gene_id	gene104011	Alias	PA0636	name	PA0636
chr	PseudoCAP	gene	692549	692890	.	+	0	gene_id	gene104013	Alias	PA0637	name	PA0637
chr	PseudoCAP	gene	692898	693593	.	+	0	gene_id	gene104015	Alias	PA0638	name	PA0638
chr	PseudoCAP	gene	693596	694366	.	+	0	gene_id	gene104017	Alias	PA0639	name	PA0639
chr	PseudoCAP	gene	694421	695023	.	+	0	gene_id	gene104019	Alias	PA0640	name	PA0640
chr	PseudoCAP	gene	695082	698696	.	+	0	gene_id	gene104021	Alias	PA0641	name	PA0641
chr	PseudoCAP	gene	698932	699720	.	+	0	gene_id	gene104023	Alias	PA0642	name	PA0642
chr	PseudoCAP	gene	699744	700835	.	+	0	gene_id	gene104025	Alias	PA0643	name	PA0643
chr	PseudoCAP	gene	700835	701170	.	+	0	gene_id	gene104027	Alias	PA0644	name	PA0644
chr	PseudoCAP	gene	701151	701381	.	+	0	gene_id	gene104029	Alias	PA0645	name	PA0645
chr	PseudoCAP	gene	701477	702529	.	+	0	gene_id	gene104031	Alias	PA0646	name	PA0646
chr	PseudoCAP	gene	702529	702831	.	+	0	gene_id	gene104033	Alias	PA0647	name	PA0647
chr	PseudoCAP	gene	702828	703058	.	+	0	gene_id	gene104035	Alias	PA0648	name	PA0648
chr	PseudoCAP	gene	703477	704082	.	+	0	gene_id	gene104037	Alias	PA0649	name	trpG
chr	PseudoCAP	gene	704084	705133	.	+	0	gene_id	gene104039	Alias	PA0650	name	trpD
chr	PseudoCAP	gene	705130	705966	.	+	0	gene_id	gene104041	Alias	PA0651	name	trpC
chr	PseudoCAP	gene	706028	706672	.	-	0	gene_id	gene104043	Alias	PA0652	name	vfr
chr	PseudoCAP	gene	706944	707366	.	+	0	gene_id	gene104045	Alias	PA0653	name	PA0653
chr	PseudoCAP	gene	707686	708480	.	+	0	gene_id	gene104047	Alias	PA0654	name	speD
chr	PseudoCAP	gene	708535	709182	.	-	0	gene_id	gene104049	Alias	PA0655	name	PA0655
chr	PseudoCAP	gene	709282	709620	.	-	0	gene_id	gene104051	Alias	PA0656	name	PA0656
chr	PseudoCAP	gene	709699	711180	.	+	0	gene_id	gene104053	Alias	PA0657	name	PA0657
chr	PseudoCAP	gene	711220	712020	.	-	0	gene_id	gene104055	Alias	PA0658	name	PA0658
chr	PseudoCAP	gene	712081	713157	.	-	0	gene_id	gene104057	Alias	PA0659	name	PA0659
chr	PseudoCAP	gene	713279	714247	.	-	0	gene_id	gene104059	Alias	PA0660	name	PA0660
chr	PseudoCAP	gene	714264	714686	.	-	0	gene_id	gene104061	Alias	PA0661	name	PA0661
chr	PseudoCAP	gene	714977	716011	.	+	0	gene_id	gene104063	Alias	PA0662	name	argC
chr	PseudoCAP	gene	716011	716730	.	+	0	gene_id	gene104065	Alias	PA0663	name	PA0663
chr	PseudoCAP	gene	716731	717153	.	+	0	gene_id	gene104067	Alias	PA0664	name	PA0664
chr	PseudoCAP	gene	717231	717581	.	+	0	gene_id	gene104069	Alias	PA0665	name	PA0665
chr	PseudoCAP	gene	717635	718726	.	-	0	gene_id	gene104071	Alias	PA0666	name	PA0666
chr	PseudoCAP	gene	718729	720072	.	-	0	gene_id	gene104073	Alias	PA0667	name	PA0667
chr	PseudoCAP	gene	720357	721556	.	+	0	gene_id	gene104075	Alias	PA0668	name	tyrZ
chr	PseudoCAP	gene	722096	723631	.	+	0	gene_id	gene104077	Alias	PA0668.1	name	PA0668.1
chr	PseudoCAP	gene	723696	723772	.	+	0	gene_id	gene104079	Alias	PA0668.2	name	PA0668.2
chr	PseudoCAP	gene	723801	723876	.	+	0	gene_id	gene104081	Alias	PA0668.3	name	PA0668.3
chr	PseudoCAP	gene	724103	726993	.	+	0	gene_id	gene104083	Alias	PA0668.4	name	PA0668.4
chr	PseudoCAP	gene	727136	727255	.	+	0	gene_id	gene104085	Alias	PA0668.5	name	PA0668.5
chr	PseudoCAP	gene	727608	730703	.	-	0	gene_id	gene104087	Alias	PA0669	name	PA0669
chr	PseudoCAP	gene	730679	732094	.	-	0	gene_id	gene104089	Alias	PA0670	name	PA0670
chr	PseudoCAP	gene	732102	732653	.	-	0	gene_id	gene104091	Alias	PA0671	name	PA0671
chr	PseudoCAP	gene	732959	733555	.	+	0	gene_id	gene104093	Alias	PA0672	name	hemO
chr	PseudoCAP	gene	733673	733993	.	-	0	gene_id	gene104095	Alias	PA0673	name	PA0673
chr	PseudoCAP	gene	734159	734875	.	+	0	gene_id	gene104097	Alias	PA0674	name	vreA
chr	PseudoCAP	gene	734872	735417	.	+	0	gene_id	gene104099	Alias	PA0675	name	vreI
chr	PseudoCAP	gene	735487	736446	.	+	0	gene_id	gene104101	Alias	PA0676	name	vreR
chr	PseudoCAP	gene	736456	737097	.	-	0	gene_id	gene104103	Alias	PA0677	name	PA0677
chr	PseudoCAP	gene	737081	737530	.	-	0	gene_id	gene104105	Alias	PA0678	name	PA0678
chr	PseudoCAP	gene	737677	738108	.	+	0	gene_id	gene104107	Alias	PA0679	name	PA0679
chr	PseudoCAP	gene	738111	738485	.	-	0	gene_id	gene104109	Alias	PA0680	name	PA0680
chr	PseudoCAP	gene	738719	739168	.	+	0	gene_id	gene104111	Alias	PA0681	name	PA0681
chr	PseudoCAP	gene	739176	740141	.	+	0	gene_id	gene104113	Alias	PA0682	name	PA0682
chr	PseudoCAP	gene	740203	741348	.	+	0	gene_id	gene104115	Alias	PA0683	name	PA0683
chr	PseudoCAP	gene	741335	741928	.	+	0	gene_id	gene104117	Alias	PA0684	name	PA0684
chr	PseudoCAP	gene	741925	744336	.	+	0	gene_id	gene104119	Alias	PA0685	name	PA0685
chr	PseudoCAP	gene	744333	745742	.	+	0	gene_id	gene104121	Alias	PA0686	name	PA0686
chr	PseudoCAP	gene	745742	746956	.	+	0	gene_id	gene104123	Alias	PA0687	name	PA0687
chr	PseudoCAP	gene	747470	748576	.	+	0	gene_id	gene104125	Alias	PA0688	name	PA0688
chr	PseudoCAP	gene	748662	749774	.	+	0	gene_id	gene104127	Alias	PA0689	name	PA0689
chr	PseudoCAP	gene	749957	762499	.	+	0	gene_id	gene104129	Alias	PA0690	name	PA0690
chr	PseudoCAP	gene	762891	763493	.	+	0	gene_id	gene104131	Alias	PA0691	name	PA0691
chr	PseudoCAP	gene	763657	765291	.	+	0	gene_id	gene104133	Alias	PA0692	name	PA0692
chr	PseudoCAP	gene	765315	767162	.	+	0	gene_id	gene104135	Alias	PA0693	name	exbB2
chr	PseudoCAP	gene	767173	767592	.	+	0	gene_id	gene104137	Alias	PA0694	name	exbD2
chr	PseudoCAP	gene	767601	768347	.	+	0	gene_id	gene104139	Alias	PA0695	name	PA0695
chr	PseudoCAP	gene	768415	770121	.	+	0	gene_id	gene104141	Alias	PA0696	name	PA0696
chr	PseudoCAP	gene	770156	770818	.	+	0	gene_id	gene104143	Alias	PA0697	name	PA0697
chr	PseudoCAP	gene	770847	771326	.	+	0	gene_id	gene104145	Alias	PA0698	name	PA0698
chr	PseudoCAP	gene	771331	772275	.	+	0	gene_id	gene104147	Alias	PA0699	name	PA0699
chr	PseudoCAP	gene	772275	772700	.	+	0	gene_id	gene104149	Alias	PA0700	name	PA0700
chr	PseudoCAP	gene	772710	773696	.	+	0	gene_id	gene104151	Alias	PA0701	name	PA0701
chr	PseudoCAP	gene	774416	775321	.	-	0	gene_id	gene104153	Alias	PA0702	name	PA0702
chr	PseudoCAP	gene	775400	776716	.	-	0	gene_id	gene104155	Alias	PA0703	name	PA0703
chr	PseudoCAP	gene	776787	778181	.	-	0	gene_id	gene104157	Alias	PA0704	name	PA0704
chr	PseudoCAP	gene	778309	779208	.	-	0	gene_id	gene104159	Alias	PA0705	name	migA
chr	PseudoCAP	gene	779463	780101	.	-	0	gene_id	gene104161	Alias	PA0706	name	cat
chr	PseudoCAP	gene	780194	780973	.	-	0	gene_id	gene104163	Alias	PA0707	name	toxR
chr	PseudoCAP	gene	781259	782113	.	-	0	gene_id	gene104165	Alias	PA0708	name	PA0708
chr	PseudoCAP	gene	782229	782525	.	+	0	gene_id	gene104167	Alias	PA0709	name	PA0709
chr	PseudoCAP	gene	782570	782965	.	+	0	gene_id	gene104169	Alias	PA0710	name	gloA2
chr	PseudoCAP	gene	783009	783515	.	-	0	gene_id	gene104171	Alias	PA0711	name	PA0711
chr	PseudoCAP	gene	783576	783833	.	-	0	gene_id	gene104173	Alias	PA0712	name	PA0712
chr	PseudoCAP	gene	784173	784466	.	+	0	gene_id	gene104175	Alias	PA0713	name	PA0713
chr	PseudoCAP	gene	784698	785174	.	+	0	gene_id	gene104177	Alias	PA0714	name	PA0714
chr	PseudoCAP	gene	785498	785570	.	+	0	gene_id	gene302395	Alias	PA0714.1	name	phrD
chr	PseudoCAP	gene	785969	786925	.	+	0	gene_id	gene104179	Alias	PA0715	name	PA0715
chr	PseudoCAP	gene	786928	788253	.	+	0	gene_id	gene104181	Alias	PA0716	name	PA0716
chr	PseudoCAP	gene	789144	789356	.	+	0	gene_id	gene104183	Alias	PA0717	name	PA0717
chr	PseudoCAP	gene	789360	789650	.	+	0	gene_id	gene104185	Alias	PA0718	name	PA0718
chr	PseudoCAP	gene	789654	790031	.	+	0	gene_id	gene104187	Alias	PA0719	name	PA0719
chr	PseudoCAP	gene	790166	790600	.	+	0	gene_id	gene104189	Alias	PA0720	name	PA0720
chr	PseudoCAP	gene	790617	790709	.	+	0	gene_id	gene104191	Alias	PA0721	name	PA0721
chr	PseudoCAP	gene	790722	790973	.	+	0	gene_id	gene104193	Alias	PA0722	name	PA0722
chr	PseudoCAP	gene	790986	791234	.	+	0	gene_id	gene104195	Alias	PA0723	name	coaB
chr	PseudoCAP	gene	791370	792632	.	+	0	gene_id	gene104197	Alias	PA0724	name	PA0724
chr	PseudoCAP	gene	792637	792993	.	+	0	gene_id	gene104199	Alias	PA0725	name	PA0725
chr	PseudoCAP	gene	792997	794271	.	+	0	gene_id	gene104201	Alias	PA0726	name	PA0726
chr	PseudoCAP	gene	794501	795793	.	+	0	gene_id	gene104203	Alias	PA0727	name	PA0727
chr	PseudoCAP	gene	795793	796776	.	+	0	gene_id	gene104205	Alias	PA0728	name	PA0728
chr	PseudoCAP	gene	797251	797598	.	+	0	gene_id	gene104207	Alias	PA0729	name	PA0729
chr	PseudoCAP	gene	797721	797794	.	-	0	gene_id	gene104209	Alias	PA0729.1	name	PA0729.1
chr	PseudoCAP	gene	797925	798827	.	-	0	gene_id	gene104211	Alias	PA0730	name	PA0730
chr	PseudoCAP	gene	799279	800016	.	-	0	gene_id	gene104213	Alias	PA0731	name	PA0731
chr	PseudoCAP	gene	800096	801139	.	-	0	gene_id	gene104215	Alias	PA0732	name	PA0732
chr	PseudoCAP	gene	801275	801967	.	-	0	gene_id	gene104217	Alias	PA0733	name	PA0733
chr	PseudoCAP	gene	801967	802239	.	-	0	gene_id	gene104219	Alias	PA0734	name	PA0734
chr	PseudoCAP	gene	802260	803075	.	-	0	gene_id	gene104221	Alias	PA0735	name	PA0735
chr	PseudoCAP	gene	803072	804148	.	-	0	gene_id	gene104223	Alias	PA0736	name	PA0736
chr	PseudoCAP	gene	804656	805111	.	+	0	gene_id	gene104225	Alias	PA0737	name	PA0737
chr	PseudoCAP	gene	805228	805473	.	+	0	gene_id	gene104227	Alias	PA0738	name	PA0738
chr	PseudoCAP	gene	805788	806702	.	-	0	gene_id	gene104229	Alias	PA0739	name	PA0739
chr	PseudoCAP	gene	806805	808781	.	+	0	gene_id	gene104231	Alias	PA0740	name	sdsA1
chr	PseudoCAP	gene	808816	809457	.	-	0	gene_id	gene104233	Alias	PA0741	name	PA0741
chr	PseudoCAP	gene	809574	809882	.	-	0	gene_id	gene104235	Alias	PA0742	name	PA0742
chr	PseudoCAP	gene	810275	811171	.	-	0	gene_id	gene104237	Alias	PA0743	name	PA0743
chr	PseudoCAP	gene	811283	812386	.	-	0	gene_id	gene104239	Alias	PA0744	name	PA0744
chr	PseudoCAP	gene	812445	813263	.	-	0	gene_id	gene104241	Alias	PA0745	name	PA0745
chr	PseudoCAP	gene	813329	814492	.	-	0	gene_id	gene104243	Alias	PA0746	name	PA0746
chr	PseudoCAP	gene	814504	816012	.	-	0	gene_id	gene104245	Alias	PA0747	name	PA0747
chr	PseudoCAP	pseudogene	816105	817025	.	+	0	gene_id	pseudogene104247	Alias	PA0748	name	still frameshift probable transcriptional regulator
chr	PseudoCAP	gene	817082	817903	.	+	0	gene_id	gene104248	Alias	PA0749	name	PA0749
chr	PseudoCAP	gene	818003	818698	.	+	0	gene_id	gene104250	Alias	PA0750	name	ung
chr	PseudoCAP	gene	818825	819862	.	-	0	gene_id	gene104252	Alias	PA0751	name	PA0751
chr	PseudoCAP	gene	819855	821372	.	-	0	gene_id	gene104254	Alias	PA0752	name	PA0752
chr	PseudoCAP	gene	821383	821853	.	-	0	gene_id	gene104256	Alias	PA0753	name	PA0753
chr	PseudoCAP	gene	821902	822885	.	-	0	gene_id	gene104258	Alias	PA0754	name	PA0754
chr	PseudoCAP	gene	822915	824198	.	-	0	gene_id	gene104260	Alias	PA0755	name	opdH
chr	PseudoCAP	gene	824409	825080	.	+	0	gene_id	gene104262	Alias	PA0756	name	PA0756
chr	PseudoCAP	gene	825073	826455	.	+	0	gene_id	gene104264	Alias	PA0757	name	PA0757
chr	PseudoCAP	gene	826463	827299	.	-	0	gene_id	gene104266	Alias	PA0758	name	PA0758
chr	PseudoCAP	gene	827400	828344	.	-	0	gene_id	gene104268	Alias	PA0759	name	PA0759
chr	PseudoCAP	gene	828617	828871	.	+	0	gene_id	gene104270	Alias	PA0760	name	PA0760
chr	PseudoCAP	gene	829276	830892	.	-	0	gene_id	gene104272	Alias	PA0761	name	nadB
chr	PseudoCAP	gene	831301	831882	.	+	0	gene_id	gene104274	Alias	PA0762	name	algU
chr	PseudoCAP	gene	831914	832498	.	+	0	gene_id	gene104276	Alias	PA0763	name	mucA
chr	PseudoCAP	gene	832507	833457	.	+	0	gene_id	gene104278	Alias	PA0764	name	mucB
chr	PseudoCAP	gene	833454	833909	.	+	0	gene_id	gene104280	Alias	PA0765	name	mucC
chr	PseudoCAP	gene	833949	835373	.	+	0	gene_id	gene104282	Alias	PA0766	name	mucD
chr	PseudoCAP	gene	835523	837322	.	+	0	gene_id	gene104284	Alias	PA0767	name	lepA
chr	PseudoCAP	gene	837328	838182	.	+	0	gene_id	gene104286	Alias	PA0768	name	lepB
chr	PseudoCAP	gene	838351	838728	.	+	0	gene_id	gene104288	Alias	PA0769	name	PA0769
chr	PseudoCAP	gene	838725	839414	.	+	0	gene_id	gene104290	Alias	PA0770	name	rnc
chr	PseudoCAP	gene	839407	840324	.	+	0	gene_id	gene104292	Alias	PA0771	name	era
chr	PseudoCAP	gene	840385	841086	.	+	0	gene_id	gene104294	Alias	PA0772	name	recO
chr	PseudoCAP	gene	841079	841825	.	+	0	gene_id	gene104296	Alias	PA0773	name	pdxJ
chr	PseudoCAP	gene	841913	842881	.	-	0	gene_id	gene104298	Alias	PA0774	name	PA0774
chr	PseudoCAP	gene	842878	843618	.	-	0	gene_id	gene104300	Alias	PA0775	name	PA0775
chr	PseudoCAP	gene	843723	844295	.	-	0	gene_id	gene104302	Alias	PA0776	name	PA0776
chr	PseudoCAP	gene	844427	845179	.	-	0	gene_id	gene104304	Alias	PA0777	name	PA0777
chr	PseudoCAP	gene	845278	845682	.	-	0	gene_id	gene104306	Alias	PA0778	name	icp
chr	PseudoCAP	gene	845793	848192	.	-	0	gene_id	gene104308	Alias	PA0779	name	asrA
chr	PseudoCAP	gene	848383	849135	.	+	0	gene_id	gene104310	Alias	PA0780	name	pruR
chr	PseudoCAP	gene	849256	851319	.	-	0	gene_id	gene104312	Alias	PA0781	name	PA0781
chr	PseudoCAP	gene	851783	854965	.	+	0	gene_id	gene104314	Alias	PA0782	name	putA
chr	PseudoCAP	gene	855277	856797	.	+	0	gene_id	gene104316	Alias	PA0783	name	putP
chr	PseudoCAP	gene	856942	857871	.	-	0	gene_id	gene104318	Alias	PA0784	name	PA0784
chr	PseudoCAP	gene	857998	858636	.	+	0	gene_id	gene104320	Alias	PA0785	name	azoR1
chr	PseudoCAP	gene	858646	858951	.	+	0	gene_id	gene104322	Alias	PA0786	name	PA0786
chr	PseudoCAP	gene	859007	860170	.	+	0	gene_id	gene104324	Alias	PA0787	name	PA0787
chr	PseudoCAP	gene	860175	863300	.	-	0	gene_id	gene104326	Alias	PA0788	name	PA0788
chr	PseudoCAP	gene	864095	865510	.	+	0	gene_id	gene104328	Alias	PA0789	name	PA0789
chr	PseudoCAP	gene	865636	866451	.	-	0	gene_id	gene104330	Alias	PA0790	name	PA0790
chr	PseudoCAP	gene	866558	867346	.	+	0	gene_id	gene104332	Alias	PA0791	name	PA0791
chr	PseudoCAP	gene	867324	868808	.	-	0	gene_id	gene104334	Alias	PA0792	name	prpD
chr	PseudoCAP	gene	868943	870130	.	-	0	gene_id	gene104336	Alias	PA0793	name	PA0793
chr	PseudoCAP	gene	870249	872855	.	-	0	gene_id	gene104338	Alias	PA0794	name	PA0794
chr	PseudoCAP	gene	872986	874113	.	-	0	gene_id	gene104340	Alias	PA0795	name	prpC
chr	PseudoCAP	gene	874206	875102	.	-	0	gene_id	gene104342	Alias	PA0796	name	prpB
chr	PseudoCAP	gene	875113	875835	.	-	0	gene_id	gene104344	Alias	PA0797	name	PA0797
chr	PseudoCAP	gene	875953	876603	.	+	0	gene_id	gene104346	Alias	PA0798	name	pmtA
chr	PseudoCAP	gene	876617	878608	.	-	0	gene_id	gene104348	Alias	PA0799	name	PA0799
chr	PseudoCAP	gene	879027	879560	.	+	0	gene_id	gene104350	Alias	PA0800	name	PA0800
chr	PseudoCAP	gene	879557	881077	.	+	0	gene_id	gene104352	Alias	PA0801	name	PA0801
chr	PseudoCAP	gene	881077	881400	.	+	0	gene_id	gene104354	Alias	PA0802	name	PA0802
chr	PseudoCAP	gene	881486	881926	.	+	0	gene_id	gene104356	Alias	PA0803	name	PA0803
chr	PseudoCAP	gene	881958	882779	.	+	0	gene_id	gene104358	Alias	PA0804	name	PA0804
chr	PseudoCAP	gene	882989	883216	.	-	0	gene_id	gene104360	Alias	PA0805	name	PA0805
chr	PseudoCAP	gene	883777	884172	.	+	0	gene_id	gene104362	Alias	PA0806	name	PA0806
chr	PseudoCAP	gene	884799	885566	.	+	0	gene_id	gene104364	Alias	PA0807	name	ampDh3
chr	PseudoCAP	gene	885635	886108	.	+	0	gene_id	gene104366	Alias	PA0808	name	PA0808
chr	PseudoCAP	gene	886160	887476	.	-	0	gene_id	gene104368	Alias	PA0809	name	PA0809
chr	PseudoCAP	gene	887583	888284	.	-	0	gene_id	gene104370	Alias	PA0810	name	PA0810
chr	PseudoCAP	gene	888315	889562	.	-	0	gene_id	gene104372	Alias	PA0811	name	PA0811
chr	PseudoCAP	gene	889559	890854	.	-	0	gene_id	gene104374	Alias	PA0812	name	PA0812
chr	PseudoCAP	gene	891142	892389	.	-	0	gene_id	gene104376	Alias	PA0813	name	PA0813
chr	PseudoCAP	gene	892386	892820	.	-	0	gene_id	gene104378	Alias	PA0814	name	PA0814
chr	PseudoCAP	gene	893041	893994	.	+	0	gene_id	gene104380	Alias	PA0815	name	PA0815
chr	PseudoCAP	gene	893967	894851	.	-	0	gene_id	gene104382	Alias	PA0816	name	PA0816
chr	PseudoCAP	gene	894952	895377	.	+	0	gene_id	gene104384	Alias	PA0817	name	PA0817
chr	PseudoCAP	gene	895396	895668	.	-	0	gene_id	gene104386	Alias	PA0818	name	PA0818
chr	PseudoCAP	gene	895824	896117	.	+	0	gene_id	gene104388	Alias	PA0819	name	PA0819
chr	PseudoCAP	gene	896416	897228	.	+	0	gene_id	gene104390	Alias	PA0820	name	PA0820
chr	PseudoCAP	gene	897335	898423	.	-	0	gene_id	gene104392	Alias	PA0821	name	PA0821
chr	PseudoCAP	gene	898440	898886	.	-	0	gene_id	gene104394	Alias	PA0822	name	PA0822
chr	PseudoCAP	gene	898908	899141	.	-	0	gene_id	gene104396	Alias	PA0823	name	PA0823
chr	PseudoCAP	gene	899138	899656	.	-	0	gene_id	gene104398	Alias	PA0824	name	PA0824
chr	PseudoCAP	gene	899830	900165	.	-	0	gene_id	gene104400	Alias	PA0825	name	PA0825
chr	PseudoCAP	gene	900408	901046	.	-	0	gene_id	gene104402	Alias	PA0826	name	PA0826
chr	PseudoCAP	gene	901520	901872	.	-	0	gene_id	gene104406	Alias	PA0826.2	name	ssrA
chr	PseudoCAP	gene	901746	901778	.	-	0	gene_id	gene104404	Alias	PA0826.1	name	PA0826.1
chr	PseudoCAP	gene	901934	902812	.	-	0	gene_id	gene104408	Alias	PA0827	name	PA0827
chr	PseudoCAP	gene	902900	903583	.	+	0	gene_id	gene104410	Alias	PA0828	name	PA0828
chr	PseudoCAP	gene	903692	904633	.	+	0	gene_id	gene104412	Alias	PA0829	name	PA0829
chr	PseudoCAP	gene	904768	905601	.	-	0	gene_id	gene104414	Alias	PA0830	name	PA0830
chr	PseudoCAP	gene	905726	906745	.	+	0	gene_id	gene104416	Alias	PA0831	name	oruR
chr	PseudoCAP	gene	906847	907488	.	+	0	gene_id	gene104418	Alias	PA0832	name	PA0832
chr	PseudoCAP	gene	907594	908307	.	+	0	gene_id	gene104420	Alias	PA0833	name	PA0833
chr	PseudoCAP	gene	908377	909291	.	-	0	gene_id	gene104422	Alias	PA0834	name	PA0834
chr	PseudoCAP	gene	909418	911532	.	-	0	gene_id	gene104424	Alias	PA0835	name	pta
chr	PseudoCAP	gene	911595	912779	.	-	0	gene_id	gene104426	Alias	PA0836	name	ackA
chr	PseudoCAP	gene	912791	912861	.	+	0	gene_id	gene191103	Alias	PA0836.1	name	P5
chr	PseudoCAP	gene	913086	913571	.	+	0	gene_id	gene104428	Alias	PA0837	name	slyD
chr	PseudoCAP	gene	913777	914259	.	+	0	gene_id	gene104430	Alias	PA0838	name	PA0838
chr	PseudoCAP	gene	914412	915002	.	+	0	gene_id	gene104432	Alias	PA0839	name	PA0839
chr	PseudoCAP	gene	915043	916155	.	+	0	gene_id	gene104434	Alias	PA0840	name	PA0840
chr	PseudoCAP	gene	916346	917305	.	+	0	gene_id	gene104436	Alias	PA0841	name	PA0841
chr	PseudoCAP	gene	917309	918529	.	-	0	gene_id	gene104438	Alias	PA0842	name	PA0842
chr	PseudoCAP	gene	918617	919240	.	-	0	gene_id	gene104440	Alias	PA0843	name	plcR
chr	PseudoCAP	gene	919258	921450	.	-	0	gene_id	gene104442	Alias	PA0844	name	plcH
chr	PseudoCAP	gene	921792	923804	.	-	0	gene_id	gene104444	Alias	PA0845	name	cerN
chr	PseudoCAP	gene	924182	924922	.	-	0	gene_id	gene104446	Alias	PA0846	name	PA0846
chr	PseudoCAP	gene	925007	927214	.	-	0	gene_id	gene104448	Alias	PA0847	name	PA0847
chr	PseudoCAP	gene	927147	927746	.	+	0	gene_id	gene104450	Alias	PA0848	name	ahpB
chr	PseudoCAP	gene	927880	928830	.	+	0	gene_id	gene104452	Alias	PA0849	name	trxB2
chr	PseudoCAP	gene	929084	929503	.	+	0	gene_id	gene104454	Alias	PA0850	name	PA0850
chr	PseudoCAP	gene	929514	930476	.	-	0	gene_id	gene104456	Alias	PA0851	name	PA0851
chr	PseudoCAP	gene	930653	931822	.	-	0	gene_id	gene104458	Alias	PA0852	name	cbpD
chr	PseudoCAP	gene	932102	932725	.	-	0	gene_id	gene104460	Alias	PA0853	name	PA0853
chr	PseudoCAP	gene	932718	934112	.	-	0	gene_id	gene104462	Alias	PA0854	name	fumC2
chr	PseudoCAP	gene	934241	935260	.	-	0	gene_id	gene104464	Alias	PA0855	name	PA0855
chr	PseudoCAP	gene	935427	935975	.	+	0	gene_id	gene104466	Alias	PA0856	name	PA0856
chr	PseudoCAP	gene	935989	936294	.	+	0	gene_id	gene104468	Alias	PA0857	name	bolA
chr	PseudoCAP	gene	936459	937397	.	+	0	gene_id	gene104470	Alias	PA0858	name	PA0858
chr	PseudoCAP	gene	937437	938039	.	+	0	gene_id	gene104472	Alias	PA0859	name	PA0859
chr	PseudoCAP	gene	938032	939822	.	+	0	gene_id	gene104474	Alias	PA0860	name	PA0860
chr	PseudoCAP	gene	940117	942573	.	+	0	gene_id	gene104476	Alias	PA0861	name	PA0861
chr	PseudoCAP	gene	942648	943430	.	+	0	gene_id	gene104478	Alias	PA0862	name	PA0862
chr	PseudoCAP	gene	943482	944441	.	-	0	gene_id	gene104480	Alias	PA0863	name	PA0863
chr	PseudoCAP	gene	944724	945512	.	-	0	gene_id	gene104482	Alias	PA0864	name	PA0864
chr	PseudoCAP	gene	945834	946907	.	+	0	gene_id	gene104484	Alias	PA0865	name	hpd
chr	PseudoCAP	gene	947205	948623	.	+	0	gene_id	gene104486	Alias	PA0866	name	aroP2
chr	PseudoCAP	gene	948776	949159	.	+	0	gene_id	gene104488	Alias	PA0867	name	mliC
chr	PseudoCAP	gene	949280	949693	.	+	0	gene_id	gene104490	Alias	PA0868	name	PA0868
chr	PseudoCAP	gene	949716	950648	.	-	0	gene_id	gene104492	Alias	PA0869	name	pbpG
chr	PseudoCAP	gene	950962	952161	.	-	0	gene_id	gene104494	Alias	PA0870	name	phhC
chr	PseudoCAP	gene	952158	952514	.	-	0	gene_id	gene104496	Alias	PA0871	name	phhB
chr	PseudoCAP	gene	952619	953407	.	-	0	gene_id	gene104498	Alias	PA0872	name	phhA
chr	PseudoCAP	gene	953691	955250	.	+	0	gene_id	gene104500	Alias	PA0873	name	phhR
chr	PseudoCAP	gene	955456	955722	.	-	0	gene_id	gene104502	Alias	PA0874	name	PA0874
chr	PseudoCAP	gene	955991	958186	.	-	0	gene_id	gene104504	Alias	PA0875	name	PA0875
chr	PseudoCAP	gene	958406	959350	.	+	0	gene_id	gene104506	Alias	PA0876	name	PA0876
chr	PseudoCAP	gene	959484	960380	.	-	0	gene_id	gene104508	Alias	PA0877	name	PA0877
chr	PseudoCAP	gene	960497	961324	.	+	0	gene_id	gene104510	Alias	PA0878	name	PA0878
chr	PseudoCAP	gene	961370	962530	.	+	0	gene_id	gene104512	Alias	PA0879	name	PA0879
chr	PseudoCAP	gene	962545	962925	.	+	0	gene_id	gene104514	Alias	PA0880	name	PA0880
chr	PseudoCAP	gene	962964	964316	.	+	0	gene_id	gene104516	Alias	PA0881	name	PA0881
chr	PseudoCAP	gene	964372	965574	.	+	0	gene_id	gene104518	Alias	PA0882	name	PA0882
chr	PseudoCAP	gene	965585	966412	.	+	0	gene_id	gene104520	Alias	PA0883	name	PA0883
chr	PseudoCAP	gene	966526	967521	.	+	0	gene_id	gene104522	Alias	PA0884	name	PA0884
chr	PseudoCAP	gene	967570	968208	.	+	0	gene_id	gene104524	Alias	PA0885	name	PA0885
chr	PseudoCAP	gene	968205	969488	.	+	0	gene_id	gene104526	Alias	PA0886	name	PA0886
chr	PseudoCAP	gene	969670	971625	.	+	0	gene_id	gene104528	Alias	PA0887	name	acsA
chr	PseudoCAP	gene	971858	971972	.	+	0	gene_id	gene191105	Alias	PA0887.1	name	P7
chr	PseudoCAP	gene	972166	972945	.	+	0	gene_id	gene104530	Alias	PA0888	name	aotJ
chr	PseudoCAP	gene	973064	973753	.	+	0	gene_id	gene104532	Alias	PA0889	name	aotQ
chr	PseudoCAP	gene	973770	974468	.	+	0	gene_id	gene104534	Alias	PA0890	name	aotM
chr	PseudoCAP	gene	974482	975594	.	+	0	gene_id	gene104536	Alias	PA0891	name	PA0891
chr	PseudoCAP	gene	975613	976377	.	+	0	gene_id	gene104538	Alias	PA0892	name	aotP
chr	PseudoCAP	gene	976410	977399	.	+	0	gene_id	gene104540	Alias	PA0893	name	argR
chr	PseudoCAP	gene	977420	977743	.	-	0	gene_id	gene104542	Alias	PA0894	name	PA0894
chr	PseudoCAP	gene	977910	979130	.	+	0	gene_id	gene104544	Alias	PA0895	name	aruC
chr	PseudoCAP	gene	979329	980345	.	+	0	gene_id	gene104546	Alias	PA0896	name	aruF
chr	PseudoCAP	gene	980357	981379	.	+	0	gene_id	gene104548	Alias	PA0897	name	aruG
chr	PseudoCAP	gene	981422	982888	.	+	0	gene_id	gene104550	Alias	PA0898	name	aruD
chr	PseudoCAP	gene	982885	984231	.	+	0	gene_id	gene104552	Alias	PA0899	name	aruB
chr	PseudoCAP	gene	984245	984535	.	+	0	gene_id	gene104554	Alias	PA0900	name	PA0900
chr	PseudoCAP	gene	984549	985547	.	+	0	gene_id	gene104556	Alias	PA0901	name	aruE
chr	PseudoCAP	gene	985692	986696	.	+	0	gene_id	gene104558	Alias	PA0902	name	PA0902
chr	PseudoCAP	gene	986818	989442	.	+	0	gene_id	gene104560	Alias	PA0903	name	alaS
chr	PseudoCAP	gene	989590	990828	.	+	0	gene_id	gene104562	Alias	PA0904	name	lysC
chr	PseudoCAP	gene	991013	991198	.	+	0	gene_id	gene104564	Alias	PA0905	name	rsmA
chr	PseudoCAP	gene	991260	991350	.	+	0	gene_id	gene104566	Alias	PA0905.1	name	PA0905.1
chr	PseudoCAP	gene	991468	991544	.	+	0	gene_id	gene104568	Alias	PA0905.2	name	PA0905.2
chr	PseudoCAP	gene	991656	991732	.	+	0	gene_id	gene104570	Alias	PA0905.3	name	PA0905.3
chr	PseudoCAP	gene	991830	992543	.	-	0	gene_id	gene104572	Alias	PA0906	name	PA0906
chr	PseudoCAP	gene	992714	993244	.	+	0	gene_id	gene104574	Alias	PA0907	name	PA0907
chr	PseudoCAP	gene	993409	993783	.	+	0	gene_id	gene104576	Alias	PA0908	name	PA0908
chr	PseudoCAP	gene	993776	994051	.	+	0	gene_id	gene104578	Alias	PA0909	name	PA0909
chr	PseudoCAP	gene	994143	994646	.	+	0	gene_id	gene104580	Alias	PA0910	name	PA0910
chr	PseudoCAP	gene	994699	995151	.	+	0	gene_id	gene104582	Alias	PA0911	name	PA0911
chr	PseudoCAP	gene	995172	995711	.	-	0	gene_id	gene104584	Alias	PA0912	name	PA0912
chr	PseudoCAP	gene	996038	997486	.	+	0	gene_id	gene104586	Alias	PA0913	name	mgtE
chr	PseudoCAP	gene	997536	997928	.	-	0	gene_id	gene104588	Alias	PA0914	name	PA0914
chr	PseudoCAP	gene	997921	998382	.	-	0	gene_id	gene104590	Alias	PA0915	name	PA0915
chr	PseudoCAP	gene	998444	999766	.	-	0	gene_id	gene104592	Alias	PA0916	name	PA0916
chr	PseudoCAP	gene	1000013	1001917	.	+	0	gene_id	gene104594	Alias	PA0917	name	kup
chr	PseudoCAP	gene	1001972	1002520	.	-	0	gene_id	gene104596	Alias	PA0918	name	PA0918
chr	PseudoCAP	gene	1002681	1003964	.	-	0	gene_id	gene104598	Alias	PA0919	name	PA0919
chr	PseudoCAP	gene	1003966	1006611	.	-	0	gene_id	gene104600	Alias	PA0920	name	PA0920
chr	PseudoCAP	gene	1006860	1007219	.	+	0	gene_id	gene104602	Alias	PA0921	name	PA0921
chr	PseudoCAP	gene	1007234	1007548	.	-	0	gene_id	gene104604	Alias	PA0922	name	PA0922
chr	PseudoCAP	gene	1007727	1007803	.	-	0	gene_id	gene104606	Alias	PA0922.1	name	PA0922.1
chr	PseudoCAP	gene	1007950	1008999	.	+	0	gene_id	gene104608	Alias	PA0923	name	dinB
chr	PseudoCAP	gene	1009006	1010934	.	-	0	gene_id	gene104610	Alias	PA0924	name	PA0924
chr	PseudoCAP	gene	1011047	1011454	.	-	0	gene_id	gene104612	Alias	PA0925	name	PA0925
chr	PseudoCAP	gene	1011522	1011947	.	-	0	gene_id	gene104614	Alias	PA0926	name	PA0926
chr	PseudoCAP	gene	1011983	1012972	.	-	0	gene_id	gene104616	Alias	PA0927	name	ldhA
chr	PseudoCAP	gene	1012975	1015752	.	-	0	gene_id	gene104618	Alias	PA0928	name	gacS
chr	PseudoCAP	gene	1015938	1016657	.	+	0	gene_id	gene104620	Alias	PA0929	name	PA0929
chr	PseudoCAP	gene	1016657	1017994	.	+	0	gene_id	gene104622	Alias	PA0930	name	PA0930
chr	PseudoCAP	gene	1018230	1020458	.	+	0	gene_id	gene104624	Alias	PA0931	name	pirA
chr	PseudoCAP	gene	1020708	1021607	.	+	0	gene_id	gene104626	Alias	PA0932	name	cysM
chr	PseudoCAP	gene	1021616	1022968	.	+	0	gene_id	gene104628	Alias	PA0933	name	ygcA
chr	PseudoCAP	gene	1023053	1025296	.	+	0	gene_id	gene104630	Alias	PA0934	name	relA
chr	PseudoCAP	gene	1025401	1026231	.	+	0	gene_id	gene104632	Alias	PA0935	name	PA0935
chr	PseudoCAP	gene	1026274	1027212	.	-	0	gene_id	gene104634	Alias	PA0936	name	lpxO2
chr	PseudoCAP	gene	1027445	1027984	.	+	0	gene_id	gene104636	Alias	PA0937	name	PA0937
chr	PseudoCAP	gene	1028172	1029500	.	+	0	gene_id	gene104638	Alias	PA0938	name	PA0938
chr	PseudoCAP	gene	1029825	1030151	.	-	0	gene_id	gene104640	Alias	PA0939	name	PA0939
chr	PseudoCAP	gene	1030157	1030411	.	-	0	gene_id	gene104642	Alias	PA0940	name	PA0940
chr	PseudoCAP	gene	1030423	1030656	.	-	0	gene_id	gene104644	Alias	PA0941	name	PA0941
chr	PseudoCAP	gene	1030772	1031332	.	+	0	gene_id	gene104646	Alias	PA0942	name	PA0942
chr	PseudoCAP	gene	1031386	1032102	.	-	0	gene_id	gene104648	Alias	PA0943	name	PA0943
chr	PseudoCAP	gene	1032095	1032763	.	-	0	gene_id	gene104650	Alias	PA0944	name	purN
chr	PseudoCAP	gene	1032763	1033824	.	-	0	gene_id	gene104652	Alias	PA0945	name	purM
chr	PseudoCAP	gene	1034038	1035075	.	+	0	gene_id	gene104654	Alias	PA0946	name	PA0946
chr	PseudoCAP	gene	1035277	1035981	.	+	0	gene_id	gene104656	Alias	PA0947	name	PA0947
chr	PseudoCAP	gene	1036158	1036577	.	-	0	gene_id	gene104658	Alias	PA0948	name	PA0948
chr	PseudoCAP	gene	1036579	1037175	.	-	0	gene_id	gene104660	Alias	PA0949	name	wrbA
chr	PseudoCAP	gene	1037172	1037525	.	-	0	gene_id	gene104662	Alias	PA0950	name	PA0950
chr	PseudoCAP	gene	1037650	1038885	.	+	0	gene_id	gene104664	Alias	PA0951	name	PA0951
chr	PseudoCAP	gene	1039240	1039623	.	-	0	gene_id	gene104666	Alias	PA0952	name	PA0952
chr	PseudoCAP	gene	1039968	1040432	.	+	0	gene_id	gene104668	Alias	PA0953	name	PA0953
chr	PseudoCAP	gene	1040432	1040707	.	+	0	gene_id	gene104670	Alias	PA0954	name	PA0954
chr	PseudoCAP	gene	1040724	1041680	.	-	0	gene_id	gene104672	Alias	PA0955	name	PA0955
chr	PseudoCAP	gene	1041689	1043404	.	-	0	gene_id	gene104674	Alias	PA0956	name	proS
chr	PseudoCAP	gene	1043512	1043919	.	+	0	gene_id	gene104676	Alias	PA0957	name	PA0957
chr	PseudoCAP	gene	1043983	1045314	.	-	0	gene_id	gene104678	Alias	PA0958	name	oprD
chr	PseudoCAP	gene	1045832	1046461	.	+	0	gene_id	gene104680	Alias	PA0959	name	PA0959
chr	PseudoCAP	gene	1046462	1046671	.	+	0	gene_id	gene104682	Alias	PA0960	name	PA0960
chr	PseudoCAP	gene	1046720	1046911	.	-	0	gene_id	gene104684	Alias	PA0961	name	PA0961
chr	PseudoCAP	gene	1047549	1048019	.	-	0	gene_id	gene104686	Alias	PA0962	name	dps
chr	PseudoCAP	gene	1048459	1050234	.	+	0	gene_id	gene104688	Alias	PA0963	name	aspS
chr	PseudoCAP	gene	1050301	1051047	.	+	0	gene_id	gene104690	Alias	PA0964	name	pmpR
chr	PseudoCAP	gene	1051132	1051656	.	+	0	gene_id	gene104692	Alias	PA0965	name	ruvC
chr	PseudoCAP	gene	1051673	1052278	.	+	0	gene_id	gene104694	Alias	PA0966	name	ruvA
chr	PseudoCAP	gene	1052289	1053347	.	+	0	gene_id	gene104696	Alias	PA0967	name	ruvB
chr	PseudoCAP	gene	1053400	1053846	.	+	0	gene_id	gene104698	Alias	PA0968	name	PA0968
chr	PseudoCAP	gene	1053848	1054543	.	+	0	gene_id	gene104700	Alias	PA0969	name	tolQ
chr	PseudoCAP	gene	1054566	1055006	.	+	0	gene_id	gene104702	Alias	PA0970	name	tolR
chr	PseudoCAP	gene	1055009	1056052	.	+	0	gene_id	gene104704	Alias	PA0971	name	tolA
chr	PseudoCAP	gene	1056049	1057347	.	+	0	gene_id	gene104706	Alias	PA0972	name	tolB
chr	PseudoCAP	gene	1057400	1057906	.	+	0	gene_id	gene104708	Alias	PA0973	name	oprL
chr	PseudoCAP	gene	1057916	1058740	.	+	0	gene_id	gene104710	Alias	PA0974	name	PA0974
chr	PseudoCAP	gene	1058812	1059606	.	+	0	gene_id	gene104712	Alias	PA0975	name	PA0975
chr	PseudoCAP	gene	1059622	1060296	.	+	0	gene_id	gene104714	Alias	PA0976	name	PA0976
chr	PseudoCAP	gene	1060356	1060431	.	+	0	gene_id	gene104716	Alias	PA0976.1	name	PA0976.1
chr	PseudoCAP	gene	1060510	1060833	.	-	0	gene_id	gene104718	Alias	PA0977	name	PA0977
chr	PseudoCAP	gene	1061207	1062034	.	-	0	gene_id	gene104720	Alias	PA0978	name	PA0978
chr	PseudoCAP	gene	1062061	1062369	.	-	0	gene_id	gene104722	Alias	PA0979	name	PA0979
chr	PseudoCAP	gene	1062601	1062885	.	+	0	gene_id	gene104724	Alias	PA0980	name	PA0980
chr	PseudoCAP	gene	1062921	1063544	.	+	0	gene_id	gene104726	Alias	PA0981	name	PA0981
chr	PseudoCAP	gene	1064555	1065103	.	-	0	gene_id	gene104728	Alias	PA0982	name	PA0982
chr	PseudoCAP	gene	1065138	1065425	.	+	0	gene_id	gene104730	Alias	PA0983	name	PA0983
chr	PseudoCAP	gene	1065970	1066296	.	+	0	gene_id	gene104732	Alias	PA0984	name	PA0984
chr	PseudoCAP	gene	1066321	1067817	.	-	0	gene_id	gene104734	Alias	PA0985	name	pyoS5
chr	PseudoCAP	gene	1068193	1068456	.	+	0	gene_id	gene104736	Alias	PA0986	name	PA0986
chr	PseudoCAP	gene	1068489	1069331	.	+	0	gene_id	gene104738	Alias	PA0987	name	PA0987
chr	PseudoCAP	gene	1069769	1070173	.	+	0	gene_id	gene104740	Alias	PA0988	name	PA0988
chr	PseudoCAP	gene	1070294	1070854	.	-	0	gene_id	gene104742	Alias	PA0989	name	PA0989
chr	PseudoCAP	gene	1071239	1071877	.	-	0	gene_id	gene104744	Alias	PA0990	name	PA0990
chr	PseudoCAP	gene	1072462	1072839	.	+	0	gene_id	gene104746	Alias	PA0991	name	hptA
chr	PseudoCAP	gene	1073285	1073902	.	+	0	gene_id	gene104748	Alias	PA0992	name	cupC1
chr	PseudoCAP	gene	1073960	1074673	.	+	0	gene_id	gene104750	Alias	PA0993	name	cupC2
chr	PseudoCAP	gene	1074784	1077303	.	+	0	gene_id	gene104752	Alias	PA0994	name	cupC3
chr	PseudoCAP	gene	1077383	1077904	.	-	0	gene_id	gene104754	Alias	PA0995	name	ogt
chr	PseudoCAP	gene	1078462	1080015	.	+	0	gene_id	gene104756	Alias	PA0996	name	pqsA
chr	PseudoCAP	gene	1080009	1080860	.	+	0	gene_id	gene104758	Alias	PA0997	name	pqsB
chr	PseudoCAP	gene	1080853	1081899	.	+	0	gene_id	gene104760	Alias	PA0998	name	pqsC
chr	PseudoCAP	gene	1081942	1082955	.	+	0	gene_id	gene104762	Alias	PA0999	name	pqsD
chr	PseudoCAP	gene	1082949	1083854	.	+	0	gene_id	gene104764	Alias	PA1000	name	pqsE
chr	PseudoCAP	gene	1083972	1085564	.	+	0	gene_id	gene104766	Alias	PA1001	name	phnA
chr	PseudoCAP	gene	1085542	1086144	.	+	0	gene_id	gene104768	Alias	PA1002	name	phnB
chr	PseudoCAP	gene	1086097	1087095	.	-	0	gene_id	gene104770	Alias	PA1003	name	mvfR
chr	PseudoCAP	gene	1087843	1088901	.	+	0	gene_id	gene104772	Alias	PA1004	name	nadA
chr	PseudoCAP	gene	1089010	1090443	.	-	0	gene_id	gene104774	Alias	PA1005	name	PA1005
chr	PseudoCAP	gene	1090606	1090857	.	+	0	gene_id	gene104776	Alias	PA1006	name	PA1006
chr	PseudoCAP	gene	1090891	1091964	.	+	0	gene_id	gene104778	Alias	PA1007	name	PA1007
chr	PseudoCAP	gene	1092025	1092498	.	-	0	gene_id	gene104780	Alias	PA1008	name	bcp
chr	PseudoCAP	gene	1092510	1093067	.	-	0	gene_id	gene104782	Alias	PA1009	name	PA1009
chr	PseudoCAP	gene	1093251	1094129	.	+	0	gene_id	gene104784	Alias	PA1010	name	dapA
chr	PseudoCAP	gene	1094147	1095337	.	+	0	gene_id	gene104786	Alias	PA1011	name	PA1011
chr	PseudoCAP	gene	1095276	1096034	.	+	0	gene_id	gene104788	Alias	PA1012	name	PA1012
chr	PseudoCAP	gene	1096063	1096773	.	+	0	gene_id	gene104790	Alias	PA1013	name	purC
chr	PseudoCAP	gene	1096867	1096956	.	+	0	gene_id	gene104792	Alias	PA1013.1	name	PA1013.1
chr	PseudoCAP	gene	1097296	1098288	.	+	0	gene_id	gene104794	Alias	PA1014	name	PA1014
chr	PseudoCAP	gene	1098328	1099128	.	-	0	gene_id	gene104796	Alias	PA1015	name	PA1015
chr	PseudoCAP	gene	1099669	1100820	.	+	0	gene_id	gene104798	Alias	PA1016	name	PA1016
chr	PseudoCAP	gene	1100930	1103077	.	+	0	gene_id	gene104800	Alias	PA1017	name	pauA
chr	PseudoCAP	gene	1103061	1103927	.	+	0	gene_id	gene104802	Alias	PA1018	name	PA1018
chr	PseudoCAP	gene	1104009	1105364	.	+	0	gene_id	gene104804	Alias	PA1019	name	mucK
chr	PseudoCAP	gene	1105888	1107000	.	+	0	gene_id	gene104806	Alias	PA1020	name	PA1020
chr	PseudoCAP	gene	1107000	1107761	.	+	0	gene_id	gene104808	Alias	PA1021	name	PA1021
chr	PseudoCAP	gene	1107763	1108908	.	+	0	gene_id	gene104810	Alias	PA1022	name	PA1022
chr	PseudoCAP	gene	1108949	1109866	.	+	0	gene_id	gene104812	Alias	PA1023	name	PA1023
chr	PseudoCAP	gene	1109882	1110868	.	+	0	gene_id	gene104814	Alias	PA1024	name	PA1024
chr	PseudoCAP	gene	1110947	1112197	.	+	0	gene_id	gene104816	Alias	PA1025	name	PA1025
chr	PseudoCAP	gene	1112574	1113050	.	-	0	gene_id	gene104818	Alias	PA1026	name	PA1026
chr	PseudoCAP	gene	1113129	1114718	.	+	0	gene_id	gene104820	Alias	PA1027	name	PA1027
chr	PseudoCAP	gene	1114774	1116060	.	+	0	gene_id	gene104822	Alias	PA1028	name	PA1028
chr	PseudoCAP	gene	1116213	1116500	.	+	0	gene_id	gene104824	Alias	PA1029	name	PA1029
chr	PseudoCAP	gene	1116635	1117390	.	+	0	gene_id	gene104826	Alias	PA1030	name	PA1030
chr	PseudoCAP	gene	1117532	1117609	.	+	0	gene_id	gene191107	Alias	PA1030.1	name	P8
chr	PseudoCAP	gene	1118158	1119519	.	+	0	gene_id	gene104828	Alias	PA1031	name	PA1031
chr	PseudoCAP	gene	1119674	1122217	.	-	0	gene_id	gene104830	Alias	PA1032	name	quiP
chr	PseudoCAP	gene	1122340	1122981	.	-	0	gene_id	gene104832	Alias	PA1033	name	PA1033
chr	PseudoCAP	gene	1123148	1123348	.	-	0	gene_id	gene104834	Alias	PA1034	name	PA1034
chr	PseudoCAP	gene	1123356	1123850	.	-	0	gene_id	gene104836	Alias	PA1035	name	PA1035
chr	PseudoCAP	gene	1124165	1124725	.	+	0	gene_id	gene104838	Alias	PA1036	name	PA1036
chr	PseudoCAP	gene	1124845	1125465	.	-	0	gene_id	gene104840	Alias	PA1037	name	PA1037
chr	PseudoCAP	gene	1125548	1125865	.	-	0	gene_id	gene104842	Alias	PA1038	name	PA1038
chr	PseudoCAP	gene	1125865	1126338	.	-	0	gene_id	gene104844	Alias	PA1039	name	PA1039
chr	PseudoCAP	gene	1126341	1126838	.	-	0	gene_id	gene104846	Alias	PA1040	name	PA1040
chr	PseudoCAP	gene	1126969	1127601	.	+	0	gene_id	gene104848	Alias	PA1041	name	PA1041
chr	PseudoCAP	gene	1127717	1128016	.	+	0	gene_id	gene104850	Alias	PA1042	name	PA1042
chr	PseudoCAP	gene	1128009	1128818	.	+	0	gene_id	gene104852	Alias	PA1043	name	PA1043
chr	PseudoCAP	gene	1128857	1129321	.	-	0	gene_id	gene104854	Alias	PA1044	name	PA1044
chr	PseudoCAP	gene	1129451	1131595	.	+	0	gene_id	gene104856	Alias	PA1045	name	PA1045
chr	PseudoCAP	gene	1131674	1133947	.	+	0	gene_id	gene104858	Alias	PA1046	name	PA1046
chr	PseudoCAP	gene	1134024	1135202	.	+	0	gene_id	gene104860	Alias	PA1047	name	PA1047
chr	PseudoCAP	gene	1135408	1136289	.	+	0	gene_id	gene104862	Alias	PA1048	name	PA1048
chr	PseudoCAP	gene	1136388	1137035	.	+	0	gene_id	gene104864	Alias	PA1049	name	pdxH
chr	PseudoCAP	gene	1137043	1138155	.	+	0	gene_id	gene104866	Alias	PA1050	name	PA1050
chr	PseudoCAP	gene	1138314	1139672	.	+	0	gene_id	gene104868	Alias	PA1051	name	PA1051
chr	PseudoCAP	gene	1139714	1140859	.	+	0	gene_id	gene104870	Alias	PA1052	name	PA1052
chr	PseudoCAP	gene	1141268	1141732	.	+	0	gene_id	gene104872	Alias	PA1053	name	PA1053
chr	PseudoCAP	gene	1142061	1144862	.	+	0	gene_id	gene104874	Alias	PA1054	name	PA1054
chr	PseudoCAP	gene	1144862	1145200	.	+	0	gene_id	gene104876	Alias	PA1055	name	PA1055
chr	PseudoCAP	gene	1145197	1146696	.	+	0	gene_id	gene104878	Alias	PA1056	name	PA1056
chr	PseudoCAP	gene	1146693	1147217	.	+	0	gene_id	gene104880	Alias	PA1057	name	PA1057
chr	PseudoCAP	gene	1147202	1147471	.	+	0	gene_id	gene104882	Alias	PA1058	name	PA1058
chr	PseudoCAP	gene	1147468	1147815	.	+	0	gene_id	gene104884	Alias	PA1059	name	PA1059
chr	PseudoCAP	gene	1147928	1148833	.	+	0	gene_id	gene104886	Alias	PA1060	name	PA1060
chr	PseudoCAP	gene	1148844	1149941	.	+	0	gene_id	gene104888	Alias	PA1061	name	PA1061
chr	PseudoCAP	gene	1149952	1150473	.	+	0	gene_id	gene104890	Alias	PA1062	name	PA1062
chr	PseudoCAP	gene	1150470	1150721	.	+	0	gene_id	gene104892	Alias	PA1063	name	PA1063
chr	PseudoCAP	gene	1150750	1151415	.	-	0	gene_id	gene104894	Alias	PA1064	name	PA1064
chr	PseudoCAP	gene	1151435	1151908	.	+	0	gene_id	gene104896	Alias	PA1065	name	PA1065
chr	PseudoCAP	gene	1151919	1152575	.	-	0	gene_id	gene104898	Alias	PA1066	name	PA1066
chr	PseudoCAP	gene	1152624	1153538	.	+	0	gene_id	gene104900	Alias	PA1067	name	PA1067
chr	PseudoCAP	gene	1153637	1155547	.	+	0	gene_id	gene104902	Alias	PA1068	name	PA1068
chr	PseudoCAP	gene	1155584	1157878	.	+	0	gene_id	gene104904	Alias	PA1069	name	PA1069
chr	PseudoCAP	gene	1157954	1158655	.	-	0	gene_id	gene104906	Alias	PA1070	name	braG
chr	PseudoCAP	gene	1158658	1159425	.	-	0	gene_id	gene104908	Alias	PA1071	name	braF
chr	PseudoCAP	gene	1159422	1160675	.	-	0	gene_id	gene104910	Alias	PA1072	name	braE
chr	PseudoCAP	gene	1160672	1161595	.	-	0	gene_id	gene104912	Alias	PA1073	name	braD
chr	PseudoCAP	gene	1161856	1162977	.	-	0	gene_id	gene104914	Alias	PA1074	name	braC
chr	PseudoCAP	gene	1163276	1163593	.	+	0	gene_id	gene104916	Alias	PA1075	name	PA1075
chr	PseudoCAP	gene	1163660	1164022	.	+	0	gene_id	gene104918	Alias	PA1076	name	PA1076
chr	PseudoCAP	gene	1164275	1164682	.	+	0	gene_id	gene104920	Alias	PA1077	name	flgB
chr	PseudoCAP	gene	1164688	1165128	.	+	0	gene_id	gene104922	Alias	PA1078	name	flgC
chr	PseudoCAP	gene	1165141	1165854	.	+	0	gene_id	gene104924	Alias	PA1079	name	flgD
chr	PseudoCAP	gene	1165882	1167270	.	+	0	gene_id	gene104926	Alias	PA1080	name	flgE
chr	PseudoCAP	gene	1167488	1168237	.	+	0	gene_id	gene104928	Alias	PA1081	name	flgF
chr	PseudoCAP	gene	1168284	1169069	.	+	0	gene_id	gene104930	Alias	PA1082	name	flgG
chr	PseudoCAP	gene	1169115	1169810	.	+	0	gene_id	gene104932	Alias	PA1083	name	flgH
chr	PseudoCAP	gene	1169822	1170931	.	+	0	gene_id	gene104934	Alias	PA1084	name	flgI
chr	PseudoCAP	gene	1170942	1172144	.	+	0	gene_id	gene104936	Alias	PA1085	name	flgJ
chr	PseudoCAP	gene	1172163	1174214	.	+	0	gene_id	gene104938	Alias	PA1086	name	flgK
chr	PseudoCAP	gene	1174240	1175559	.	+	0	gene_id	gene104940	Alias	PA1087	name	flgL
chr	PseudoCAP	gene	1175614	1176375	.	+	0	gene_id	gene104942	Alias	PA1088	name	PA1088
chr	PseudoCAP	gene	1176380	1176982	.	+	0	gene_id	gene104944	Alias	PA1089	name	PA1089
chr	PseudoCAP	gene	1176958	1177620	.	+	0	gene_id	gene104946	Alias	PA1090	name	PA1090
chr	PseudoCAP	gene	1177613	1182697	.	+	0	gene_id	gene104948	Alias	PA1091	name	fgtA
chr	PseudoCAP	gene	1183058	1184524	.	+	0	gene_id	gene104950	Alias	PA1092	name	fliC
chr	PseudoCAP	gene	1184603	1184974	.	+	0	gene_id	gene104952	Alias	PA1093	name	PA1093
chr	PseudoCAP	gene	1185060	1186484	.	+	0	gene_id	gene104954	Alias	PA1094	name	fliD
chr	PseudoCAP	gene	1186606	1186986	.	+	0	gene_id	gene104956	Alias	PA1095	name	PA1095
chr	PseudoCAP	gene	1187009	1187305	.	+	0	gene_id	gene104958	Alias	PA1096	name	PA1096
chr	PseudoCAP	gene	1187587	1189059	.	+	0	gene_id	gene104960	Alias	PA1097	name	fleQ
chr	PseudoCAP	gene	1189172	1190380	.	+	0	gene_id	gene104962	Alias	PA1098	name	fleS
chr	PseudoCAP	gene	1190385	1191806	.	+	0	gene_id	gene104964	Alias	PA1099	name	fleR
chr	PseudoCAP	gene	1192053	1192382	.	+	0	gene_id	gene104966	Alias	PA1100	name	fliE
chr	PseudoCAP	gene	1192405	1194201	.	+	0	gene_id	gene104968	Alias	PA1101	name	fliF
chr	PseudoCAP	gene	1194207	1195223	.	+	0	gene_id	gene104970	Alias	PA1102	name	fliG
chr	PseudoCAP	gene	1195225	1196031	.	+	0	gene_id	gene104972	Alias	PA1103	name	PA1103
chr	PseudoCAP	gene	1196021	1197376	.	+	0	gene_id	gene104974	Alias	PA1104	name	fliI
chr	PseudoCAP	gene	1197390	1197833	.	+	0	gene_id	gene104976	Alias	PA1105	name	fliJ
chr	PseudoCAP	gene	1197838	1198551	.	-	0	gene_id	gene104978	Alias	PA1106	name	PA1106
chr	PseudoCAP	gene	1198750	1199946	.	-	0	gene_id	gene104980	Alias	PA1107	name	PA1107
chr	PseudoCAP	gene	1200063	1201220	.	-	0	gene_id	gene104982	Alias	PA1108	name	PA1108
chr	PseudoCAP	gene	1201310	1202089	.	+	0	gene_id	gene104984	Alias	PA1109	name	PA1109
chr	PseudoCAP	gene	1202094	1202804	.	-	0	gene_id	gene104986	Alias	PA1110	name	PA1110
chr	PseudoCAP	gene	1202917	1203540	.	+	0	gene_id	gene104988	Alias	PA1111	name	PA1111
chr	PseudoCAP	gene	1203633	1204781	.	+	0	gene_id	gene104992	Alias	PA1112	name	PA1112
chr	PseudoCAP	gene	1205031	1205330	.	-	0	gene_id	gene104990	Alias	PA1112.1	name	PA1112.1
chr	PseudoCAP	gene	1205771	1207537	.	+	0	gene_id	gene104994	Alias	PA1113	name	PA1113
chr	PseudoCAP	gene	1207540	1207875	.	-	0	gene_id	gene104996	Alias	PA1114	name	PA1114
chr	PseudoCAP	gene	1207979	1210303	.	-	0	gene_id	gene104998	Alias	PA1115	name	PA1115
chr	PseudoCAP	gene	1210558	1211397	.	+	0	gene_id	gene105000	Alias	PA1116	name	PA1116
chr	PseudoCAP	gene	1211407	1211781	.	-	0	gene_id	gene105002	Alias	PA1117	name	PA1117
chr	PseudoCAP	gene	1211888	1212571	.	-	0	gene_id	gene105004	Alias	PA1118	name	PA1118
chr	PseudoCAP	gene	1212717	1213223	.	-	0	gene_id	gene105006	Alias	PA1119	name	yfiB
chr	PseudoCAP	gene	1213195	1214502	.	-	0	gene_id	gene105008	Alias	PA1120	name	tpbB
chr	PseudoCAP	gene	1214502	1215074	.	-	0	gene_id	gene105010	Alias	PA1121	name	yfiR
chr	PseudoCAP	gene	1215284	1215727	.	+	0	gene_id	gene105012	Alias	PA1122	name	PA1122
chr	PseudoCAP	gene	1216120	1216440	.	-	0	gene_id	gene105014	Alias	PA1123	name	PA1123
chr	PseudoCAP	gene	1216671	1218167	.	+	0	gene_id	gene105016	Alias	PA1124	name	dgt
chr	PseudoCAP	gene	1218181	1218933	.	+	0	gene_id	gene105018	Alias	PA1125	name	PA1125
chr	PseudoCAP	gene	1218940	1219527	.	-	0	gene_id	gene105020	Alias	PA1126	name	PA1126
chr	PseudoCAP	gene	1219621	1220610	.	-	0	gene_id	gene105022	Alias	PA1127	name	PA1127
chr	PseudoCAP	gene	1220745	1221656	.	+	0	gene_id	gene105024	Alias	PA1128	name	PA1128
chr	PseudoCAP	gene	1221691	1222098	.	+	0	gene_id	gene105026	Alias	PA1129	name	PA1129
chr	PseudoCAP	gene	1222095	1223072	.	-	0	gene_id	gene105028	Alias	PA1130	name	rhlC
chr	PseudoCAP	gene	1223060	1224328	.	-	0	gene_id	gene105030	Alias	PA1131	name	PA1131
chr	PseudoCAP	gene	1224641	1225330	.	+	0	gene_id	gene105032	Alias	PA1132	name	PA1132
chr	PseudoCAP	gene	1225340	1225690	.	-	0	gene_id	gene105034	Alias	PA1133	name	PA1133
chr	PseudoCAP	gene	1225757	1226278	.	-	0	gene_id	gene105036	Alias	PA1134	name	PA1134
chr	PseudoCAP	gene	1226427	1227302	.	-	0	gene_id	gene105038	Alias	PA1135	name	PA1135
chr	PseudoCAP	gene	1227474	1228205	.	+	0	gene_id	gene105040	Alias	PA1136	name	PA1136
chr	PseudoCAP	gene	1228212	1229198	.	-	0	gene_id	gene105042	Alias	PA1137	name	PA1137
chr	PseudoCAP	gene	1229344	1230219	.	+	0	gene_id	gene105044	Alias	PA1138	name	PA1138
chr	PseudoCAP	gene	1230310	1231158	.	+	0	gene_id	gene105046	Alias	PA1139	name	PA1139
chr	PseudoCAP	gene	1231256	1232092	.	-	0	gene_id	gene105048	Alias	PA1140	name	PA1140
chr	PseudoCAP	gene	1232229	1233131	.	-	0	gene_id	gene105050	Alias	PA1141	name	PA1141
chr	PseudoCAP	gene	1233297	1234013	.	-	0	gene_id	gene105052	Alias	PA1142	name	PA1142
chr	PseudoCAP	gene	1234095	1234748	.	-	0	gene_id	gene105054	Alias	PA1143	name	PA1143
chr	PseudoCAP	gene	1234816	1236150	.	-	0	gene_id	gene105056	Alias	PA1144	name	PA1144
chr	PseudoCAP	gene	1236644	1237546	.	+	0	gene_id	gene105058	Alias	PA1145	name	PA1145
chr	PseudoCAP	gene	1237551	1238732	.	-	0	gene_id	gene105060	Alias	PA1146	name	PA1146
chr	PseudoCAP	gene	1238834	1240324	.	-	0	gene_id	gene105062	Alias	PA1147	name	PA1147
chr	PseudoCAP	gene	1240584	1242500	.	-	0	gene_id	gene105064	Alias	PA1148	name	toxA
chr	PseudoCAP	gene	1242750	1243118	.	-	0	gene_id	gene105066	Alias	PA1149	name	PA1149
chr	PseudoCAP	gene	1243594	1245663	.	+	0	gene_id	gene105068	Alias	PA1150	name	pys2
chr	PseudoCAP	gene	1245665	1245928	.	+	0	gene_id	gene105070	Alias	PA1151	name	imm2
chr	PseudoCAP	gene	1246444	1246788	.	+	0	gene_id	gene105072	Alias	PA1152	name	PA1152
chr	PseudoCAP	gene	1247932	1248486	.	-	0	gene_id	gene105074	Alias	PA1153	name	PA1153
chr	PseudoCAP	gene	1249019	1249552	.	-	0	gene_id	gene105076	Alias	PA1154	name	PA1154
chr	PseudoCAP	gene	1249907	1251154	.	-	0	gene_id	gene105078	Alias	PA1155	name	nrdB
chr	PseudoCAP	gene	1251418	1254309	.	-	0	gene_id	gene105080	Alias	PA1156	name	nrdA
chr	PseudoCAP	gene	1255042	1255752	.	+	0	gene_id	gene105082	Alias	PA1157	name	PA1157
chr	PseudoCAP	gene	1256094	1257452	.	+	0	gene_id	gene105084	Alias	PA1158	name	PA1158
chr	PseudoCAP	gene	1257772	1257981	.	+	0	gene_id	gene105086	Alias	PA1159	name	PA1159
chr	PseudoCAP	gene	1258087	1258470	.	-	0	gene_id	gene105088	Alias	PA1160	name	PA1160
chr	PseudoCAP	gene	1258488	1259291	.	-	0	gene_id	gene105090	Alias	PA1161	name	rrmA
chr	PseudoCAP	gene	1259291	1260442	.	-	0	gene_id	gene105092	Alias	PA1162	name	dapE
chr	PseudoCAP	gene	1260557	1263166	.	-	0	gene_id	gene105094	Alias	PA1163	name	ndvB
chr	PseudoCAP	gene	1263378	1264190	.	+	0	gene_id	gene105096	Alias	PA1164	name	PA1164
chr	PseudoCAP	gene	1264191	1264919	.	-	0	gene_id	gene105098	Alias	PA1165	name	pcpS
chr	PseudoCAP	gene	1265147	1265935	.	-	0	gene_id	gene105100	Alias	PA1166	name	PA1166
chr	PseudoCAP	gene	1266111	1266782	.	+	0	gene_id	gene105102	Alias	PA1167	name	PA1167
chr	PseudoCAP	gene	1267282	1267602	.	+	0	gene_id	gene105104	Alias	PA1168	name	PA1168
chr	PseudoCAP	gene	1267680	1269737	.	+	0	gene_id	gene105106	Alias	PA1169	name	PA1169
chr	PseudoCAP	gene	1269781	1270515	.	-	0	gene_id	gene105108	Alias	PA1170	name	PA1170
chr	PseudoCAP	gene	1270972	1272168	.	+	0	gene_id	gene105110	Alias	PA1171	name	PA1171
chr	PseudoCAP	gene	1272200	1272796	.	-	0	gene_id	gene105112	Alias	PA1172	name	napC
chr	PseudoCAP	gene	1272807	1273298	.	-	0	gene_id	gene105114	Alias	PA1173	name	napB
chr	PseudoCAP	gene	1273309	1275798	.	-	0	gene_id	gene105116	Alias	PA1174	name	napA
chr	PseudoCAP	gene	1275795	1276124	.	-	0	gene_id	gene105118	Alias	PA1175	name	napD
chr	PseudoCAP	gene	1276117	1276608	.	-	0	gene_id	gene105120	Alias	PA1176	name	napF
chr	PseudoCAP	gene	1276617	1276784	.	-	0	gene_id	gene105122	Alias	PA1177	name	napE
chr	PseudoCAP	gene	1277006	1277608	.	+	0	gene_id	gene105124	Alias	PA1178	name	oprH
chr	PseudoCAP	gene	1277688	1278365	.	+	0	gene_id	gene105126	Alias	PA1179	name	phoP
chr	PseudoCAP	gene	1278362	1279708	.	+	0	gene_id	gene105128	Alias	PA1180	name	phoQ
chr	PseudoCAP	gene	1279810	1283172	.	+	0	gene_id	gene105130	Alias	PA1181	name	PA1181
chr	PseudoCAP	gene	1283176	1284177	.	-	0	gene_id	gene105132	Alias	PA1182	name	PA1182
chr	PseudoCAP	gene	1284513	1285823	.	+	0	gene_id	gene105134	Alias	PA1183	name	dctA
chr	PseudoCAP	gene	1285898	1286788	.	-	0	gene_id	gene105136	Alias	PA1184	name	PA1184
chr	PseudoCAP	gene	1286990	1287619	.	+	0	gene_id	gene105138	Alias	PA1185	name	PA1185
chr	PseudoCAP	gene	1287616	1288635	.	+	0	gene_id	gene105140	Alias	PA1186	name	PA1186
chr	PseudoCAP	gene	1288737	1289876	.	+	0	gene_id	gene105142	Alias	PA1187	name	PA1187
chr	PseudoCAP	gene	1289965	1291146	.	+	0	gene_id	gene105144	Alias	PA1188	name	PA1188
chr	PseudoCAP	gene	1291148	1291645	.	-	0	gene_id	gene105146	Alias	PA1189	name	PA1189
chr	PseudoCAP	gene	1291813	1292412	.	-	0	gene_id	gene105148	Alias	PA1190	name	PA1190
chr	PseudoCAP	gene	1292571	1293164	.	-	0	gene_id	gene105150	Alias	PA1191	name	PA1191
chr	PseudoCAP	gene	1293267	1294091	.	+	0	gene_id	gene105152	Alias	PA1192	name	PA1192
chr	PseudoCAP	gene	1294138	1294809	.	+	0	gene_id	gene105154	Alias	PA1193	name	PA1193
chr	PseudoCAP	gene	1294811	1296229	.	-	0	gene_id	gene105156	Alias	PA1194	name	PA1194
chr	PseudoCAP	gene	1296334	1297098	.	-	0	gene_id	gene105158	Alias	PA1195	name	PA1195
chr	PseudoCAP	gene	1297309	1298709	.	+	0	gene_id	gene105160	Alias	PA1196	name	PA1196
chr	PseudoCAP	gene	1298722	1299492	.	+	0	gene_id	gene105162	Alias	PA1197	name	PA1197
chr	PseudoCAP	gene	1299558	1300175	.	+	0	gene_id	gene105164	Alias	PA1198	name	PA1198
chr	PseudoCAP	gene	1300258	1300791	.	+	0	gene_id	gene105166	Alias	PA1199	name	PA1199
chr	PseudoCAP	gene	1300811	1301473	.	+	0	gene_id	gene105168	Alias	PA1200	name	PA1200
chr	PseudoCAP	gene	1301481	1302395	.	-	0	gene_id	gene105170	Alias	PA1201	name	PA1201
chr	PseudoCAP	gene	1302696	1303313	.	+	0	gene_id	gene105172	Alias	PA1202	name	PA1202
chr	PseudoCAP	gene	1303457	1303864	.	+	0	gene_id	gene105174	Alias	PA1203	name	PA1203
chr	PseudoCAP	gene	1303892	1304449	.	+	0	gene_id	gene105176	Alias	PA1204	name	PA1204
chr	PseudoCAP	gene	1304476	1305423	.	+	0	gene_id	gene105178	Alias	PA1205	name	PA1205
chr	PseudoCAP	gene	1305583	1306056	.	+	0	gene_id	gene105180	Alias	PA1206	name	PA1206
chr	PseudoCAP	gene	1306059	1307900	.	+	0	gene_id	gene105182	Alias	PA1207	name	kefB
chr	PseudoCAP	gene	1308067	1309566	.	+	0	gene_id	gene105184	Alias	PA1208	name	PA1208
chr	PseudoCAP	gene	1309583	1310518	.	-	0	gene_id	gene105186	Alias	PA1209	name	PA1209
chr	PseudoCAP	gene	1310688	1311386	.	-	0	gene_id	gene105188	Alias	PA1210	name	PA1210
chr	PseudoCAP	gene	1311504	1312139	.	-	0	gene_id	gene105190	Alias	PA1211	name	PA1211
chr	PseudoCAP	gene	1312136	1313365	.	-	0	gene_id	gene105192	Alias	PA1212	name	PA1212
chr	PseudoCAP	gene	1313362	1314321	.	-	0	gene_id	gene105194	Alias	PA1213	name	PA1213
chr	PseudoCAP	gene	1314318	1315916	.	-	0	gene_id	gene105196	Alias	PA1214	name	PA1214
chr	PseudoCAP	gene	1315916	1317202	.	-	0	gene_id	gene105198	Alias	PA1215	name	PA1215
chr	PseudoCAP	gene	1317404	1318150	.	-	0	gene_id	gene105200	Alias	PA1216	name	PA1216
chr	PseudoCAP	gene	1318147	1319514	.	-	0	gene_id	gene105202	Alias	PA1217	name	PA1217
chr	PseudoCAP	gene	1319511	1320389	.	-	0	gene_id	gene105204	Alias	PA1218	name	PA1218
chr	PseudoCAP	gene	1320386	1321000	.	-	0	gene_id	gene105206	Alias	PA1219	name	PA1219
chr	PseudoCAP	gene	1320994	1322256	.	-	0	gene_id	gene105208	Alias	PA1220	name	PA1220
chr	PseudoCAP	gene	1322253	1324109	.	-	0	gene_id	gene105210	Alias	PA1221	name	PA1221
chr	PseudoCAP	gene	1324793	1325950	.	-	0	gene_id	gene105212	Alias	PA1222	name	PA1222
chr	PseudoCAP	gene	1326046	1326939	.	-	0	gene_id	gene105214	Alias	PA1223	name	PA1223
chr	PseudoCAP	gene	1327024	1327803	.	+	0	gene_id	gene105216	Alias	PA1224	name	PA1224
chr	PseudoCAP	gene	1327813	1328439	.	-	0	gene_id	gene105218	Alias	PA1225	name	PA1225
chr	PseudoCAP	gene	1328545	1329153	.	+	0	gene_id	gene105220	Alias	PA1226	name	PA1226
chr	PseudoCAP	gene	1329192	1330040	.	+	0	gene_id	gene105222	Alias	PA1227	name	PA1227
chr	PseudoCAP	gene	1330117	1330467	.	-	0	gene_id	gene105224	Alias	PA1228	name	PA1228
chr	PseudoCAP	gene	1330577	1331383	.	-	0	gene_id	gene105226	Alias	PA1229	name	PA1229
chr	PseudoCAP	gene	1331517	1331714	.	+	0	gene_id	gene105228	Alias	PA1230	name	PA1230
chr	PseudoCAP	gene	1331727	1332635	.	+	0	gene_id	gene105230	Alias	PA1231	name	PA1231
chr	PseudoCAP	gene	1332635	1334674	.	+	0	gene_id	gene105232	Alias	PA1232	name	PA1232
chr	PseudoCAP	gene	1334671	1334928	.	+	0	gene_id	gene105234	Alias	PA1233	name	PA1233
chr	PseudoCAP	gene	1334950	1335453	.	-	0	gene_id	gene105236	Alias	PA1234	name	PA1234
chr	PseudoCAP	gene	1335645	1336427	.	+	0	gene_id	gene105238	Alias	PA1235	name	PA1235
chr	PseudoCAP	gene	1336430	1337941	.	-	0	gene_id	gene105240	Alias	PA1236	name	PA1236
chr	PseudoCAP	gene	1337931	1339082	.	-	0	gene_id	gene105242	Alias	PA1237	name	PA1237
chr	PseudoCAP	gene	1339079	1340527	.	-	0	gene_id	gene105244	Alias	PA1238	name	PA1238
chr	PseudoCAP	gene	1340910	1341794	.	-	0	gene_id	gene105246	Alias	PA1239	name	PA1239
chr	PseudoCAP	gene	1341851	1342648	.	-	0	gene_id	gene105248	Alias	PA1240	name	PA1240
chr	PseudoCAP	gene	1342813	1343373	.	+	0	gene_id	gene105250	Alias	PA1241	name	PA1241
chr	PseudoCAP	gene	1343453	1345225	.	+	0	gene_id	gene105252	Alias	PA1242	name	sprP
chr	PseudoCAP	gene	1345248	1347824	.	-	0	gene_id	gene105254	Alias	PA1243	name	PA1243
chr	PseudoCAP	gene	1348060	1348401	.	-	0	gene_id	gene105256	Alias	PA1244	name	PA1244
chr	PseudoCAP	gene	1349416	1350660	.	+	0	gene_id	gene105258	Alias	PA1245	name	aprX
chr	PseudoCAP	gene	1350747	1352528	.	+	0	gene_id	gene105260	Alias	PA1246	name	aprD
chr	PseudoCAP	gene	1352525	1353823	.	+	0	gene_id	gene105262	Alias	PA1247	name	aprE
chr	PseudoCAP	gene	1353827	1355272	.	+	0	gene_id	gene105264	Alias	PA1248	name	aprF
chr	PseudoCAP	gene	1355631	1357070	.	+	0	gene_id	gene105266	Alias	PA1249	name	aprA
chr	PseudoCAP	gene	1357317	1357712	.	+	0	gene_id	gene105268	Alias	PA1250	name	aprI
chr	PseudoCAP	gene	1357725	1359350	.	-	0	gene_id	gene105270	Alias	PA1251	name	PA1251
chr	PseudoCAP	gene	1359590	1360594	.	+	0	gene_id	gene105272	Alias	PA1252	name	PA1252
chr	PseudoCAP	gene	1360698	1362278	.	-	0	gene_id	gene105274	Alias	PA1253	name	PA1253
chr	PseudoCAP	gene	1362371	1363288	.	-	0	gene_id	gene105276	Alias	PA1254	name	PA1254
chr	PseudoCAP	gene	1363439	1364473	.	-	0	gene_id	gene105278	Alias	PA1255	name	PA1255
chr	PseudoCAP	gene	1364499	1365221	.	-	0	gene_id	gene105280	Alias	PA1256	name	PA1256
chr	PseudoCAP	gene	1365218	1365862	.	-	0	gene_id	gene105282	Alias	PA1257	name	PA1257
chr	PseudoCAP	gene	1365873	1366538	.	-	0	gene_id	gene105284	Alias	PA1258	name	PA1258
chr	PseudoCAP	gene	1366538	1368280	.	-	0	gene_id	gene105286	Alias	PA1259	name	PA1259
chr	PseudoCAP	gene	1368339	1369160	.	-	0	gene_id	gene105288	Alias	PA1260	name	PA1260
chr	PseudoCAP	gene	1369418	1370092	.	-	0	gene_id	gene105290	Alias	PA1261	name	PA1261
chr	PseudoCAP	gene	1370257	1371699	.	-	0	gene_id	gene105292	Alias	PA1262	name	PA1262
chr	PseudoCAP	gene	1371738	1372682	.	+	0	gene_id	gene105294	Alias	PA1263	name	PA1263
chr	PseudoCAP	gene	1372979	1373845	.	-	0	gene_id	gene105296	Alias	PA1264	name	PA1264
chr	PseudoCAP	gene	1373945	1374847	.	+	0	gene_id	gene105298	Alias	PA1265	name	PA1265
chr	PseudoCAP	gene	1374844	1376097	.	-	0	gene_id	gene105300	Alias	PA1266	name	PA1266
chr	PseudoCAP	gene	1376327	1377442	.	-	0	gene_id	gene105302	Alias	PA1267	name	PA1267
chr	PseudoCAP	gene	1377439	1378383	.	-	0	gene_id	gene105304	Alias	PA1268	name	PA1268
chr	PseudoCAP	gene	1378500	1379168	.	-	0	gene_id	gene105306	Alias	PA1269	name	PA1269
chr	PseudoCAP	gene	1379413	1381452	.	+	0	gene_id	gene105308	Alias	PA1270	name	PA1270
chr	PseudoCAP	gene	1381804	1383654	.	+	0	gene_id	gene105310	Alias	PA1271	name	PA1271
chr	PseudoCAP	gene	1383718	1384329	.	+	0	gene_id	gene105312	Alias	PA1272	name	cobO
chr	PseudoCAP	gene	1384361	1385668	.	+	0	gene_id	gene105314	Alias	PA1273	name	cobB
chr	PseudoCAP	gene	1385670	1386326	.	+	0	gene_id	gene105316	Alias	PA1274	name	PA1274
chr	PseudoCAP	gene	1386323	1387261	.	+	0	gene_id	gene105318	Alias	PA1275	name	cobD
chr	PseudoCAP	gene	1387254	1388249	.	+	0	gene_id	gene105320	Alias	PA1276	name	cobC
chr	PseudoCAP	gene	1388242	1389714	.	+	0	gene_id	gene105322	Alias	PA1277	name	cobQ
chr	PseudoCAP	gene	1389707	1390228	.	+	0	gene_id	gene105324	Alias	PA1278	name	cobP
chr	PseudoCAP	gene	1390225	1391280	.	+	0	gene_id	gene105326	Alias	PA1279	name	cobU
chr	PseudoCAP	gene	1391277	1391861	.	+	0	gene_id	gene105328	Alias	PA1280	name	PA1280
chr	PseudoCAP	gene	1391864	1392601	.	+	0	gene_id	gene105330	Alias	PA1281	name	cobV
chr	PseudoCAP	gene	1392564	1394069	.	-	0	gene_id	gene105332	Alias	PA1282	name	PA1282
chr	PseudoCAP	gene	1394188	1394748	.	+	0	gene_id	gene105334	Alias	PA1283	name	PA1283
chr	PseudoCAP	gene	1394779	1396599	.	-	0	gene_id	gene105336	Alias	PA1284	name	PA1284
chr	PseudoCAP	gene	1396731	1397180	.	+	0	gene_id	gene105338	Alias	PA1285	name	PA1285
chr	PseudoCAP	gene	1397254	1398453	.	+	0	gene_id	gene105340	Alias	PA1286	name	PA1286
chr	PseudoCAP	gene	1398618	1399172	.	+	0	gene_id	gene105342	Alias	PA1287	name	PA1287
chr	PseudoCAP	gene	1399231	1400505	.	-	0	gene_id	gene105344	Alias	PA1288	name	PA1288
chr	PseudoCAP	gene	1400711	1401190	.	-	0	gene_id	gene105346	Alias	PA1289	name	PA1289
chr	PseudoCAP	gene	1401412	1402005	.	-	0	gene_id	gene105348	Alias	PA1290	name	PA1290
chr	PseudoCAP	gene	1402117	1402956	.	+	0	gene_id	gene105350	Alias	PA1291	name	PA1291
chr	PseudoCAP	gene	1402981	1403835	.	-	0	gene_id	gene105352	Alias	PA1292	name	PA1292
chr	PseudoCAP	gene	1404136	1405197	.	-	0	gene_id	gene105354	Alias	PA1293	name	PA1293
chr	PseudoCAP	gene	1405338	1406462	.	+	0	gene_id	gene105356	Alias	PA1294	name	rnd
chr	PseudoCAP	gene	1406459	1406752	.	+	0	gene_id	gene105358	Alias	PA1295	name	PA1295
chr	PseudoCAP	gene	1407007	1407939	.	+	0	gene_id	gene105360	Alias	PA1296	name	PA1296
chr	PseudoCAP	gene	1407951	1408931	.	-	0	gene_id	gene105362	Alias	PA1297	name	PA1297
chr	PseudoCAP	gene	1408999	1409274	.	+	0	gene_id	gene105364	Alias	PA1298	name	PA1298
chr	PseudoCAP	gene	1409351	1409800	.	+	0	gene_id	gene105366	Alias	PA1299	name	PA1299
chr	PseudoCAP	gene	1409949	1410476	.	+	0	gene_id	gene105368	Alias	PA1300	name	PA1300
chr	PseudoCAP	gene	1410473	1411456	.	+	0	gene_id	gene105370	Alias	PA1301	name	PA1301
chr	PseudoCAP	gene	1411585	1414140	.	+	0	gene_id	gene105372	Alias	PA1302	name	PA1302
chr	PseudoCAP	gene	1414147	1414686	.	-	0	gene_id	gene105374	Alias	PA1303	name	PA1303
chr	PseudoCAP	gene	1414763	1416814	.	-	0	gene_id	gene105376	Alias	PA1304	name	PA1304
chr	PseudoCAP	gene	1416963	1417436	.	+	0	gene_id	gene105378	Alias	PA1305	name	PA1305
chr	PseudoCAP	gene	1417500	1417961	.	+	0	gene_id	gene105380	Alias	PA1306	name	PA1306
chr	PseudoCAP	gene	1417965	1418738	.	+	0	gene_id	gene105382	Alias	PA1307	name	PA1307
chr	PseudoCAP	gene	1418765	1419289	.	+	0	gene_id	gene105384	Alias	PA1308	name	PA1308
chr	PseudoCAP	gene	1419298	1420158	.	-	0	gene_id	gene105386	Alias	PA1309	name	PA1309
chr	PseudoCAP	gene	1420326	1421441	.	+	0	gene_id	gene105388	Alias	PA1310	name	phnW
chr	PseudoCAP	gene	1421477	1422304	.	+	0	gene_id	gene105390	Alias	PA1311	name	phnX
chr	PseudoCAP	gene	1422355	1423266	.	-	0	gene_id	gene105392	Alias	PA1312	name	PA1312
chr	PseudoCAP	gene	1423374	1424732	.	+	0	gene_id	gene105394	Alias	PA1313	name	PA1313
chr	PseudoCAP	gene	1424746	1425132	.	+	0	gene_id	gene105396	Alias	PA1314	name	PA1314
chr	PseudoCAP	gene	1425140	1425754	.	-	0	gene_id	gene105398	Alias	PA1315	name	PA1315
chr	PseudoCAP	gene	1425912	1427453	.	+	0	gene_id	gene105400	Alias	PA1316	name	PA1316
chr	PseudoCAP	gene	1428080	1429075	.	+	0	gene_id	gene105402	Alias	PA1317	name	cyoA
chr	PseudoCAP	gene	1429082	1431058	.	+	0	gene_id	gene105404	Alias	PA1318	name	cyoB
chr	PseudoCAP	gene	1431062	1431691	.	+	0	gene_id	gene105406	Alias	PA1319	name	cyoC
chr	PseudoCAP	gene	1431691	1432026	.	+	0	gene_id	gene105408	Alias	PA1320	name	cyoD
chr	PseudoCAP	gene	1432037	1432927	.	+	0	gene_id	gene105410	Alias	PA1321	name	cyoE
chr	PseudoCAP	gene	1433166	1435364	.	+	0	gene_id	gene105412	Alias	PA1322	name	PA1322
chr	PseudoCAP	gene	1435493	1435825	.	+	0	gene_id	gene105414	Alias	PA1323	name	PA1323
chr	PseudoCAP	gene	1435885	1436397	.	+	0	gene_id	gene105416	Alias	PA1324	name	PA1324
chr	PseudoCAP	gene	1436491	1436618	.	+	0	gene_id	gene191109	Alias	PA1324.1	name	P9
chr	PseudoCAP	gene	1436663	1437070	.	+	0	gene_id	gene105418	Alias	PA1325	name	PA1325
chr	PseudoCAP	gene	1437067	1438614	.	+	0	gene_id	gene105420	Alias	PA1326	name	ilvA2
chr	PseudoCAP	gene	1438706	1440676	.	+	0	gene_id	gene105422	Alias	PA1327	name	PA1327
chr	PseudoCAP	gene	1440639	1441547	.	-	0	gene_id	gene105424	Alias	PA1328	name	PA1328
chr	PseudoCAP	gene	1441632	1442063	.	+	0	gene_id	gene105426	Alias	PA1329	name	PA1329
chr	PseudoCAP	gene	1442069	1442848	.	+	0	gene_id	gene105428	Alias	PA1330	name	PA1330
chr	PseudoCAP	gene	1442904	1444451	.	-	0	gene_id	gene105430	Alias	PA1331	name	PA1331
chr	PseudoCAP	gene	1444720	1445271	.	-	0	gene_id	gene105432	Alias	PA1332	name	PA1332
chr	PseudoCAP	gene	1445405	1445611	.	-	0	gene_id	gene105434	Alias	PA1333	name	PA1333
chr	PseudoCAP	gene	1445806	1446918	.	-	0	gene_id	gene105436	Alias	PA1334	name	PA1334
chr	PseudoCAP	gene	1447226	1448503	.	-	0	gene_id	gene105438	Alias	PA1335	name	PA1335
chr	PseudoCAP	gene	1448548	1450449	.	-	0	gene_id	gene105440	Alias	PA1336	name	PA1336
chr	PseudoCAP	gene	1450545	1451633	.	-	0	gene_id	gene105442	Alias	PA1337	name	ansB
chr	PseudoCAP	gene	1451719	1453392	.	-	0	gene_id	gene105444	Alias	PA1338	name	ggt
chr	PseudoCAP	gene	1453470	1454204	.	-	0	gene_id	gene105446	Alias	PA1339	name	PA1339
chr	PseudoCAP	gene	1454201	1454869	.	-	0	gene_id	gene105448	Alias	PA1340	name	PA1340
chr	PseudoCAP	gene	1454866	1455612	.	-	0	gene_id	gene105450	Alias	PA1341	name	PA1341
chr	PseudoCAP	gene	1455815	1456723	.	-	0	gene_id	gene105452	Alias	PA1342	name	PA1342
chr	PseudoCAP	gene	1457175	1457633	.	+	0	gene_id	gene105454	Alias	PA1343	name	PA1343
chr	PseudoCAP	gene	1457729	1458523	.	+	0	gene_id	gene105456	Alias	PA1344	name	PA1344
chr	PseudoCAP	gene	1458707	1460296	.	+	0	gene_id	gene105458	Alias	PA1345	name	PA1345
chr	PseudoCAP	gene	1460307	1461854	.	-	0	gene_id	gene105460	Alias	PA1346	name	PA1346
chr	PseudoCAP	gene	1461938	1462630	.	-	0	gene_id	gene105462	Alias	PA1347	name	PA1347
chr	PseudoCAP	gene	1462696	1463403	.	+	0	gene_id	gene105464	Alias	PA1348	name	PA1348
chr	PseudoCAP	gene	1463586	1463936	.	+	0	gene_id	gene105466	Alias	PA1349	name	PA1349
chr	PseudoCAP	gene	1464111	1464860	.	+	0	gene_id	gene105468	Alias	PA1350	name	PA1350
chr	PseudoCAP	gene	1464878	1466101	.	+	0	gene_id	gene105470	Alias	PA1351	name	PA1351
chr	PseudoCAP	gene	1466109	1467320	.	-	0	gene_id	gene105472	Alias	PA1352	name	PA1352
chr	PseudoCAP	gene	1467488	1467901	.	-	0	gene_id	gene105474	Alias	PA1353	name	PA1353
chr	PseudoCAP	gene	1467938	1468363	.	-	0	gene_id	gene105476	Alias	PA1354	name	PA1354
chr	PseudoCAP	gene	1468510	1468890	.	+	0	gene_id	gene105478	Alias	PA1355	name	PA1355
chr	PseudoCAP	gene	1468913	1470019	.	+	0	gene_id	gene105480	Alias	PA1356	name	PA1356
chr	PseudoCAP	gene	1470088	1470564	.	+	0	gene_id	gene105482	Alias	PA1357	name	PA1357
chr	PseudoCAP	gene	1470580	1470978	.	-	0	gene_id	gene105484	Alias	PA1358	name	PA1358
chr	PseudoCAP	gene	1471016	1471672	.	-	0	gene_id	gene105486	Alias	PA1359	name	PA1359
chr	PseudoCAP	gene	1471671	1472564	.	+	0	gene_id	gene105488	Alias	PA1360	name	PA1360
chr	PseudoCAP	gene	1472547	1473980	.	-	0	gene_id	gene105490	Alias	PA1361	name	PA1361
chr	PseudoCAP	gene	1474391	1474714	.	+	0	gene_id	gene105492	Alias	PA1362	name	PA1362
chr	PseudoCAP	gene	1474727	1475467	.	+	0	gene_id	gene105494	Alias	PA1363	name	PA1363
chr	PseudoCAP	gene	1475464	1476306	.	+	0	gene_id	gene105496	Alias	PA1364	name	PA1364
chr	PseudoCAP	gene	1476384	1478825	.	+	0	gene_id	gene105498	Alias	PA1365	name	PA1365
chr	PseudoCAP	gene	1479021	1479791	.	-	0	gene_id	gene105500	Alias	PA1366	name	PA1366
chr	PseudoCAP	gene	1480215	1481051	.	-	0	gene_id	gene105502	Alias	PA1367	name	PA1367
chr	PseudoCAP	gene	1481334	1482758	.	-	0	gene_id	gene105504	Alias	PA1368	name	PA1368
chr	PseudoCAP	gene	1483123	1483875	.	+	0	gene_id	gene105506	Alias	PA1369	name	PA1369
chr	PseudoCAP	gene	1483898	1485763	.	+	0	gene_id	gene105508	Alias	PA1370	name	PA1370
chr	PseudoCAP	gene	1486266	1486967	.	-	0	gene_id	gene105510	Alias	PA1371	name	PA1371
chr	PseudoCAP	gene	1486960	1489095	.	-	0	gene_id	gene105512	Alias	PA1372	name	PA1372
chr	PseudoCAP	gene	1489815	1491083	.	-	0	gene_id	gene105514	Alias	PA1373	name	fabF2
chr	PseudoCAP	gene	1491192	1491698	.	+	0	gene_id	gene105516	Alias	PA1374	name	PA1374
chr	PseudoCAP	gene	1491913	1493055	.	+	0	gene_id	gene105518	Alias	PA1375	name	pdxB
chr	PseudoCAP	gene	1493090	1494823	.	-	0	gene_id	gene105520	Alias	PA1376	name	aceK
chr	PseudoCAP	gene	1494959	1495492	.	+	0	gene_id	gene105522	Alias	PA1377	name	PA1377
chr	PseudoCAP	gene	1495635	1495997	.	+	0	gene_id	gene105524	Alias	PA1378	name	PA1378
chr	PseudoCAP	gene	1496087	1496920	.	-	0	gene_id	gene105526	Alias	PA1379	name	PA1379
chr	PseudoCAP	gene	1497012	1497977	.	+	0	gene_id	gene105528	Alias	PA1380	name	PA1380
chr	PseudoCAP	gene	1498338	1498829	.	+	0	gene_id	gene105530	Alias	PA1381	name	PA1381
chr	PseudoCAP	gene	1498813	1501092	.	+	0	gene_id	gene105532	Alias	PA1382	name	PA1382
chr	PseudoCAP	gene	1501611	1503416	.	+	0	gene_id	gene105534	Alias	PA1383	name	PA1383
chr	PseudoCAP	gene	1503568	1504581	.	+	0	gene_id	gene105536	Alias	PA1384	name	galE
chr	PseudoCAP	gene	1504605	1505729	.	+	0	gene_id	gene105538	Alias	PA1385	name	PA1385
chr	PseudoCAP	gene	1505749	1507017	.	+	0	gene_id	gene105540	Alias	PA1386	name	PA1386
chr	PseudoCAP	gene	1507164	1508720	.	+	0	gene_id	gene105542	Alias	PA1387	name	PA1387
chr	PseudoCAP	gene	1508737	1509465	.	+	0	gene_id	gene105544	Alias	PA1388	name	PA1388
chr	PseudoCAP	gene	1509562	1511046	.	+	0	gene_id	gene105546	Alias	PA1389	name	PA1389
chr	PseudoCAP	gene	1511232	1512266	.	+	0	gene_id	gene105548	Alias	PA1390	name	PA1390
chr	PseudoCAP	gene	1512260	1514035	.	+	0	gene_id	gene105550	Alias	PA1391	name	PA1391
chr	PseudoCAP	gene	1514036	1515280	.	+	0	gene_id	gene105552	Alias	PA1392	name	PA1392
chr	PseudoCAP	gene	1515337	1515927	.	-	0	gene_id	gene105554	Alias	PA1393	name	cysC
chr	PseudoCAP	gene	1516433	1516687	.	+	0	gene_id	gene105556	Alias	PA1394	name	PA1394
chr	PseudoCAP	gene	1516703	1517119	.	+	0	gene_id	gene105558	Alias	PA1395	name	PA1395
chr	PseudoCAP	gene	1517146	1518768	.	-	0	gene_id	gene105560	Alias	PA1396	name	PA1396
chr	PseudoCAP	gene	1518914	1519546	.	+	0	gene_id	gene105562	Alias	PA1397	name	PA1397
chr	PseudoCAP	gene	1519627	1519968	.	+	0	gene_id	gene105564	Alias	PA1398	name	PA1398
chr	PseudoCAP	gene	1519984	1520904	.	-	0	gene_id	gene105566	Alias	PA1399	name	PA1399
chr	PseudoCAP	gene	1521109	1524396	.	+	0	gene_id	gene105568	Alias	PA1400	name	PA1400
chr	PseudoCAP	gene	1524424	1524831	.	-	0	gene_id	gene105570	Alias	PA1401	name	PA1401
chr	PseudoCAP	gene	1524909	1525574	.	-	0	gene_id	gene105572	Alias	PA1402	name	PA1402
chr	PseudoCAP	gene	1525667	1526299	.	+	0	gene_id	gene105574	Alias	PA1403	name	PA1403
chr	PseudoCAP	gene	1526430	1526657	.	-	0	gene_id	gene105576	Alias	PA1404	name	PA1404
chr	PseudoCAP	gene	1527191	1528783	.	+	0	gene_id	gene105578	Alias	PA1405	name	PA1405
chr	PseudoCAP	gene	1528803	1529561	.	-	0	gene_id	gene105580	Alias	PA1406	name	PA1406
chr	PseudoCAP	gene	1529597	1530538	.	-	0	gene_id	gene105582	Alias	PA1407	name	PA1407
chr	PseudoCAP	gene	1530605	1533028	.	-	0	gene_id	gene105584	Alias	PA1408	name	PA1408
chr	PseudoCAP	gene	1533238	1534278	.	+	0	gene_id	gene105586	Alias	PA1409	name	aphA
chr	PseudoCAP	gene	1534289	1535380	.	+	0	gene_id	gene105588	Alias	PA1410	name	PA1410
chr	PseudoCAP	gene	1535586	1536497	.	+	0	gene_id	gene105590	Alias	PA1411	name	PA1411
chr	PseudoCAP	gene	1536457	1537650	.	-	0	gene_id	gene105592	Alias	PA1412	name	PA1412
chr	PseudoCAP	gene	1537755	1538627	.	+	0	gene_id	gene105594	Alias	PA1413	name	PA1413
chr	PseudoCAP	gene	1538683	1538916	.	+	0	gene_id	gene105596	Alias	PA1414	name	PA1414
chr	PseudoCAP	gene	1538976	1539704	.	-	0	gene_id	gene105598	Alias	PA1415	name	PA1415
chr	PseudoCAP	gene	1539749	1541131	.	-	0	gene_id	gene105600	Alias	PA1416	name	PA1416
chr	PseudoCAP	gene	1541145	1542746	.	-	0	gene_id	gene105602	Alias	PA1417	name	PA1417
chr	PseudoCAP	gene	1542822	1544213	.	-	0	gene_id	gene105604	Alias	PA1418	name	PA1418
chr	PseudoCAP	gene	1544307	1545818	.	-	0	gene_id	gene105606	Alias	PA1419	name	PA1419
chr	PseudoCAP	gene	1545837	1546256	.	-	0	gene_id	gene105608	Alias	PA1420	name	PA1420
chr	PseudoCAP	gene	1546271	1547230	.	-	0	gene_id	gene105610	Alias	PA1421	name	gbuA
chr	PseudoCAP	gene	1547437	1548330	.	+	0	gene_id	gene105612	Alias	PA1422	name	gbuR
chr	PseudoCAP	gene	1548334	1549587	.	-	0	gene_id	gene105614	Alias	PA1423	name	bdlA
chr	PseudoCAP	gene	1549883	1550494	.	+	0	gene_id	gene105616	Alias	PA1424	name	PA1424
chr	PseudoCAP	gene	1550984	1552600	.	+	0	gene_id	gene105618	Alias	PA1425	name	PA1425
chr	PseudoCAP	gene	1552641	1552997	.	+	0	gene_id	gene105620	Alias	PA1426	name	PA1426
chr	PseudoCAP	gene	1553112	1553675	.	+	0	gene_id	gene105622	Alias	PA1427	name	PA1427
chr	PseudoCAP	gene	1554415	1554846	.	+	0	gene_id	gene105624	Alias	PA1428	name	PA1428
chr	PseudoCAP	gene	1555012	1557720	.	+	0	gene_id	gene105626	Alias	PA1429	name	PA1429
chr	PseudoCAP	gene	1558171	1558890	.	+	0	gene_id	gene105628	Alias	PA1430	name	lasR
chr	PseudoCAP	gene	1558880	1559122	.	-	0	gene_id	gene105630	Alias	PA1431	name	rsaL
chr	PseudoCAP	gene	1559254	1559859	.	+	0	gene_id	gene105632	Alias	PA1432	name	lasI
chr	PseudoCAP	gene	1559966	1561918	.	-	0	gene_id	gene105634	Alias	PA1433	name	PA1433
chr	PseudoCAP	gene	1561919	1562632	.	-	0	gene_id	gene105636	Alias	PA1434	name	PA1434
chr	PseudoCAP	gene	1562813	1563970	.	+	0	gene_id	gene105638	Alias	PA1435	name	PA1435
chr	PseudoCAP	gene	1563967	1567077	.	+	0	gene_id	gene105640	Alias	PA1436	name	PA1436
chr	PseudoCAP	gene	1567181	1567870	.	+	0	gene_id	gene105642	Alias	PA1437	name	PA1437
chr	PseudoCAP	gene	1567848	1569293	.	+	0	gene_id	gene105644	Alias	PA1438	name	PA1438
chr	PseudoCAP	gene	1569302	1569709	.	-	0	gene_id	gene105646	Alias	PA1439	name	PA1439
chr	PseudoCAP	gene	1569721	1570308	.	-	0	gene_id	gene105648	Alias	PA1440	name	PA1440
chr	PseudoCAP	gene	1570496	1571779	.	+	0	gene_id	gene105650	Alias	PA1441	name	PA1441
chr	PseudoCAP	gene	1572023	1572544	.	+	0	gene_id	gene105652	Alias	PA1442	name	PA1442
chr	PseudoCAP	gene	1572552	1573523	.	+	0	gene_id	gene105654	Alias	PA1443	name	fliM
chr	PseudoCAP	gene	1573551	1574024	.	+	0	gene_id	gene105656	Alias	PA1444	name	fliN
chr	PseudoCAP	gene	1574026	1574478	.	+	0	gene_id	gene105658	Alias	PA1445	name	fliO
chr	PseudoCAP	gene	1574475	1575242	.	+	0	gene_id	gene105660	Alias	PA1446	name	fliP
chr	PseudoCAP	gene	1575290	1575559	.	+	0	gene_id	gene105662	Alias	PA1447	name	fliQ
chr	PseudoCAP	gene	1575559	1576335	.	+	0	gene_id	gene105664	Alias	PA1448	name	fliR
chr	PseudoCAP	gene	1576338	1577474	.	+	0	gene_id	gene105666	Alias	PA1449	name	flhB
chr	PseudoCAP	gene	1577547	1578806	.	+	0	gene_id	gene105668	Alias	PA1450	name	PA1450
chr	PseudoCAP	gene	1578839	1580182	.	+	0	gene_id	gene105670	Alias	PA1451	name	PA1451
chr	PseudoCAP	gene	1580321	1582444	.	+	0	gene_id	gene105672	Alias	PA1452	name	flhA
chr	PseudoCAP	gene	1582528	1583817	.	+	0	gene_id	gene105674	Alias	PA1453	name	flhF
chr	PseudoCAP	gene	1583956	1584798	.	+	0	gene_id	gene105676	Alias	PA1454	name	fleN
chr	PseudoCAP	gene	1584795	1585538	.	+	0	gene_id	gene105678	Alias	PA1455	name	fliA
chr	PseudoCAP	gene	1585640	1586014	.	+	0	gene_id	gene105680	Alias	PA1456	name	cheY
chr	PseudoCAP	gene	1586034	1586822	.	+	0	gene_id	gene105682	Alias	PA1457	name	cheZ
chr	PseudoCAP	gene	1587023	1589284	.	+	0	gene_id	gene105684	Alias	PA1458	name	PA1458
chr	PseudoCAP	gene	1589338	1590444	.	+	0	gene_id	gene105686	Alias	PA1459	name	PA1459
chr	PseudoCAP	gene	1590533	1591273	.	+	0	gene_id	gene105688	Alias	PA1460	name	motC
chr	PseudoCAP	gene	1591286	1592176	.	+	0	gene_id	gene105690	Alias	PA1461	name	motD
chr	PseudoCAP	gene	1592271	1593059	.	+	0	gene_id	gene105692	Alias	PA1462	name	PA1462
chr	PseudoCAP	gene	1593151	1594041	.	+	0	gene_id	gene105694	Alias	PA1463	name	PA1463
chr	PseudoCAP	gene	1594087	1594566	.	+	0	gene_id	gene105696	Alias	PA1464	name	PA1464
chr	PseudoCAP	gene	1594597	1595004	.	+	0	gene_id	gene105698	Alias	PA1465	name	PA1465
chr	PseudoCAP	gene	1595032	1595718	.	-	0	gene_id	gene105700	Alias	PA1466	name	PA1466
chr	PseudoCAP	gene	1595827	1596798	.	+	0	gene_id	gene105702	Alias	PA1467	name	PA1467
chr	PseudoCAP	gene	1596889	1597305	.	+	0	gene_id	gene105704	Alias	PA1468	name	PA1468
chr	PseudoCAP	gene	1597365	1598087	.	+	0	gene_id	gene105706	Alias	PA1469	name	PA1469
chr	PseudoCAP	gene	1598221	1598958	.	+	0	gene_id	gene105708	Alias	PA1470	name	PA1470
chr	PseudoCAP	gene	1599024	1599320	.	-	0	gene_id	gene105710	Alias	PA1471	name	PA1471
chr	PseudoCAP	gene	1599428	1599982	.	-	0	gene_id	gene105712	Alias	PA1472	name	PA1472
chr	PseudoCAP	gene	1600083	1600418	.	-	0	gene_id	gene105714	Alias	PA1473	name	PA1473
chr	PseudoCAP	gene	1600415	1601893	.	-	0	gene_id	gene105716	Alias	PA1474	name	PA1474
chr	PseudoCAP	gene	1602179	1602880	.	+	0	gene_id	gene105718	Alias	PA1475	name	ccmA
chr	PseudoCAP	gene	1602877	1603548	.	+	0	gene_id	gene105720	Alias	PA1476	name	ccmB
chr	PseudoCAP	gene	1603671	1604429	.	+	0	gene_id	gene105722	Alias	PA1477	name	ccmC
chr	PseudoCAP	gene	1604426	1604602	.	+	0	gene_id	gene105724	Alias	PA1478	name	PA1478
chr	PseudoCAP	gene	1604599	1605087	.	+	0	gene_id	gene105726	Alias	PA1479	name	ccmE
chr	PseudoCAP	gene	1605088	1607061	.	+	0	gene_id	gene105728	Alias	PA1480	name	ccmF
chr	PseudoCAP	gene	1607065	1607607	.	+	0	gene_id	gene105730	Alias	PA1481	name	ccmG
chr	PseudoCAP	gene	1607604	1608071	.	+	0	gene_id	gene105732	Alias	PA1482	name	ccmH
chr	PseudoCAP	gene	1608068	1609291	.	+	0	gene_id	gene105734	Alias	PA1483	name	cycH
chr	PseudoCAP	gene	1609738	1610544	.	-	0	gene_id	gene105736	Alias	PA1484	name	PA1484
chr	PseudoCAP	gene	1610745	1612112	.	+	0	gene_id	gene105738	Alias	PA1485	name	PA1485
chr	PseudoCAP	gene	1612126	1613226	.	+	0	gene_id	gene105740	Alias	PA1486	name	bapF
chr	PseudoCAP	gene	1613234	1614649	.	-	0	gene_id	gene105742	Alias	PA1487	name	PA1487
chr	PseudoCAP	gene	1614670	1615908	.	-	0	gene_id	gene105744	Alias	PA1488	name	PA1488
chr	PseudoCAP	gene	1615895	1617085	.	-	0	gene_id	gene105746	Alias	PA1489	name	PA1489
chr	PseudoCAP	gene	1617489	1618265	.	-	0	gene_id	gene105748	Alias	PA1490	name	PA1490
chr	PseudoCAP	gene	1618612	1619847	.	+	0	gene_id	gene105750	Alias	PA1491	name	PA1491
chr	PseudoCAP	gene	1619907	1620263	.	+	0	gene_id	gene105752	Alias	PA1492	name	PA1492
chr	PseudoCAP	gene	1620345	1621343	.	-	0	gene_id	gene105754	Alias	PA1493	name	cysP
chr	PseudoCAP	gene	1621472	1623127	.	-	0	gene_id	gene105756	Alias	PA1494	name	muiA
chr	PseudoCAP	gene	1623251	1623877	.	-	0	gene_id	gene105758	Alias	PA1495	name	PA1495
chr	PseudoCAP	gene	1623864	1624715	.	-	0	gene_id	gene105760	Alias	PA1496	name	PA1496
chr	PseudoCAP	gene	1624781	1625695	.	-	0	gene_id	gene105762	Alias	PA1497	name	PA1497
chr	PseudoCAP	gene	1626062	1627495	.	-	0	gene_id	gene105764	Alias	PA1498	name	pykF
chr	PseudoCAP	gene	1627497	1628762	.	-	0	gene_id	gene105766	Alias	PA1499	name	PA1499
chr	PseudoCAP	gene	1629059	1629949	.	-	0	gene_id	gene105768	Alias	PA1500	name	PA1500
chr	PseudoCAP	gene	1630024	1630806	.	-	0	gene_id	gene105770	Alias	PA1501	name	PA1501
chr	PseudoCAP	gene	1630902	1632677	.	-	0	gene_id	gene105772	Alias	PA1502	name	gcl
chr	PseudoCAP	gene	1633006	1633437	.	+	0	gene_id	gene105774	Alias	PA1503	name	PA1503
chr	PseudoCAP	gene	1633842	1634492	.	-	0	gene_id	gene105776	Alias	PA1504	name	PA1504
chr	PseudoCAP	gene	1634728	1635723	.	+	0	gene_id	gene105778	Alias	PA1505	name	moaA2
chr	PseudoCAP	gene	1635908	1636237	.	+	0	gene_id	gene105780	Alias	PA1506	name	PA1506
chr	PseudoCAP	gene	1636329	1637696	.	-	0	gene_id	gene105782	Alias	PA1507	name	PA1507
chr	PseudoCAP	gene	1638379	1638639	.	-	0	gene_id	gene105784	Alias	PA1508	name	PA1508
chr	PseudoCAP	gene	1638652	1639794	.	-	0	gene_id	gene105786	Alias	PA1509	name	PA1509
chr	PseudoCAP	gene	1639791	1641500	.	-	0	gene_id	gene105788	Alias	PA1510	name	PA1510
chr	PseudoCAP	gene	1641497	1644025	.	-	0	gene_id	gene105790	Alias	PA1511	name	PA1511
chr	PseudoCAP	gene	1644207	1644725	.	-	0	gene_id	gene105792	Alias	PA1512	name	hcpA
chr	PseudoCAP	gene	1645211	1646488	.	-	0	gene_id	gene105794	Alias	PA1513	name	PA1513
chr	PseudoCAP	gene	1646537	1647046	.	-	0	gene_id	gene105796	Alias	PA1514	name	PA1514
chr	PseudoCAP	gene	1647101	1648099	.	-	0	gene_id	gene105798	Alias	PA1515	name	alc
chr	PseudoCAP	gene	1648117	1648632	.	-	0	gene_id	gene105800	Alias	PA1516	name	PA1516
chr	PseudoCAP	gene	1648629	1649555	.	-	0	gene_id	gene105802	Alias	PA1517	name	PA1517
chr	PseudoCAP	gene	1649928	1650308	.	+	0	gene_id	gene105804	Alias	PA1518	name	PA1518
chr	PseudoCAP	gene	1650549	1651898	.	-	0	gene_id	gene105806	Alias	PA1519	name	PA1519
chr	PseudoCAP	gene	1652273	1653052	.	+	0	gene_id	gene105808	Alias	PA1520	name	PA1520
chr	PseudoCAP	gene	1653106	1654410	.	-	0	gene_id	gene105810	Alias	PA1521	name	PA1521
chr	PseudoCAP	gene	1654480	1655319	.	-	0	gene_id	gene105812	Alias	PA1522	name	PA1522
chr	PseudoCAP	gene	1655346	1657745	.	-	0	gene_id	gene105814	Alias	PA1523	name	xdhB
chr	PseudoCAP	gene	1657738	1659192	.	-	0	gene_id	gene105816	Alias	PA1524	name	xdhA
chr	PseudoCAP	gene	1659413	1660546	.	-	0	gene_id	gene105818	Alias	PA1525	name	alkB2
chr	PseudoCAP	gene	1660727	1661386	.	+	0	gene_id	gene105820	Alias	PA1526	name	PA1526
chr	PseudoCAP	gene	1661412	1664900	.	+	0	gene_id	gene105822	Alias	PA1527	name	PA1527
chr	PseudoCAP	gene	1665065	1665934	.	+	0	gene_id	gene105824	Alias	PA1528	name	zipA
chr	PseudoCAP	gene	1666025	1668409	.	+	0	gene_id	gene105826	Alias	PA1529	name	lig
chr	PseudoCAP	gene	1668455	1668832	.	+	0	gene_id	gene105828	Alias	PA1530	name	PA1530
chr	PseudoCAP	gene	1668840	1669799	.	+	0	gene_id	gene105830	Alias	PA1530.1	name	ffs
chr	PseudoCAP	gene	1669086	1669952	.	-	0	gene_id	gene105832	Alias	PA1531	name	PA1531
chr	PseudoCAP	gene	1669989	1672034	.	+	0	gene_id	gene105834	Alias	PA1532	name	dnaX
chr	PseudoCAP	gene	1672080	1672406	.	+	0	gene_id	gene105836	Alias	PA1533	name	PA1533
chr	PseudoCAP	gene	1672485	1673081	.	+	0	gene_id	gene105838	Alias	PA1534	name	recR
chr	PseudoCAP	gene	1673204	1674352	.	+	0	gene_id	gene105840	Alias	PA1535	name	PA1535
chr	PseudoCAP	gene	1674365	1674904	.	-	0	gene_id	gene105842	Alias	PA1536	name	PA1536
chr	PseudoCAP	gene	1674978	1675865	.	-	0	gene_id	gene105844	Alias	PA1537	name	PA1537
chr	PseudoCAP	gene	1675862	1677445	.	-	0	gene_id	gene105846	Alias	PA1538	name	PA1538
chr	PseudoCAP	gene	1677559	1678407	.	+	0	gene_id	gene105848	Alias	PA1539	name	PA1539
chr	PseudoCAP	gene	1678261	1678590	.	-	0	gene_id	gene105850	Alias	PA1540	name	PA1540
chr	PseudoCAP	gene	1678584	1678952	.	-	0	gene_id	gene105852	Alias	PA1541	name	PA1541
chr	PseudoCAP	gene	1679361	1680197	.	-	0	gene_id	gene105854	Alias	PA1542	name	PA1542
chr	PseudoCAP	gene	1680437	1680985	.	-	0	gene_id	gene105856	Alias	PA1543	name	apt
chr	PseudoCAP	gene	1681071	1681805	.	-	0	gene_id	gene105858	Alias	PA1544	name	anr
chr	PseudoCAP	gene	1682051	1682518	.	+	0	gene_id	gene105860	Alias	PA1545	name	PA1545
chr	PseudoCAP	gene	1682567	1683949	.	-	0	gene_id	gene105862	Alias	PA1546	name	hemN
chr	PseudoCAP	gene	1684077	1684760	.	-	0	gene_id	gene105864	Alias	PA1547	name	PA1547
chr	PseudoCAP	gene	1684753	1684962	.	-	0	gene_id	gene105866	Alias	PA1548	name	PA1548
chr	PseudoCAP	gene	1684941	1687376	.	-	0	gene_id	gene105868	Alias	PA1549	name	PA1549
chr	PseudoCAP	gene	1687373	1687912	.	-	0	gene_id	gene105870	Alias	PA1550	name	PA1550
chr	PseudoCAP	gene	1687924	1689339	.	-	0	gene_id	gene105872	Alias	PA1551	name	PA1551
chr	PseudoCAP	gene	1689557	1690513	.	-	0	gene_id	gene105874	Alias	PA1552	name	ccoP1
chr	PseudoCAP	gene	1690510	1690695	.	-	0	gene_id	gene302409	Alias	PA1552.1	name	ccoQ1
chr	PseudoCAP	gene	1690701	1691312	.	-	0	gene_id	gene105876	Alias	PA1553	name	ccoO1
chr	PseudoCAP	gene	1691327	1692754	.	-	0	gene_id	gene105878	Alias	PA1554	name	ccoN1
chr	PseudoCAP	gene	1693119	1694045	.	-	0	gene_id	gene105880	Alias	PA1555	name	ccoP2
chr	PseudoCAP	gene	1694042	1694227	.	-	0	gene_id	gene302411	Alias	PA1555.1	name	ccoQ2
chr	PseudoCAP	gene	1694233	1694841	.	-	0	gene_id	gene105882	Alias	PA1556	name	ccoO2
chr	PseudoCAP	gene	1694852	1696279	.	-	0	gene_id	gene105884	Alias	PA1557	name	ccoN2
chr	PseudoCAP	gene	1696467	1697099	.	+	0	gene_id	gene105886	Alias	PA1558	name	PA1558
chr	PseudoCAP	gene	1697188	1697919	.	+	0	gene_id	gene105888	Alias	PA1559	name	PA1559
chr	PseudoCAP	gene	1697916	1698344	.	+	0	gene_id	gene105890	Alias	PA1560	name	PA1560
chr	PseudoCAP	gene	1698382	1699947	.	-	0	gene_id	gene105892	Alias	PA1561	name	aer
chr	PseudoCAP	gene	1700320	1703052	.	-	0	gene_id	gene105894	Alias	PA1562	name	acnA
chr	PseudoCAP	gene	1703379	1704437	.	+	0	gene_id	gene105896	Alias	PA1563	name	PA1563
chr	PseudoCAP	gene	1704522	1704761	.	+	0	gene_id	gene105898	Alias	PA1564	name	PA1564
chr	PseudoCAP	gene	1704793	1706103	.	-	0	gene_id	gene105900	Alias	PA1565	name	pauB2
chr	PseudoCAP	gene	1706172	1707536	.	-	0	gene_id	gene105902	Alias	PA1566	name	pauA3
chr	PseudoCAP	gene	1708004	1709401	.	-	0	gene_id	gene105904	Alias	PA1567	name	PA1567
chr	PseudoCAP	gene	1709412	1709765	.	-	0	gene_id	gene105906	Alias	PA1568	name	PA1568
chr	PseudoCAP	gene	1709821	1711191	.	-	0	gene_id	gene105908	Alias	PA1569	name	PA1569
chr	PseudoCAP	gene	1711569	1712450	.	+	0	gene_id	gene105910	Alias	PA1570	name	PA1570
chr	PseudoCAP	gene	1712519	1712698	.	-	0	gene_id	gene105912	Alias	PA1571	name	PA1571
chr	PseudoCAP	gene	1712908	1714053	.	+	0	gene_id	gene105914	Alias	PA1572	name	PA1572
chr	PseudoCAP	gene	1714064	1714660	.	+	0	gene_id	gene105916	Alias	PA1573	name	PA1573
chr	PseudoCAP	gene	1714778	1715059	.	-	0	gene_id	gene105918	Alias	PA1574	name	PA1574
chr	PseudoCAP	gene	1715154	1715705	.	-	0	gene_id	gene105920	Alias	PA1575	name	PA1575
chr	PseudoCAP	gene	1715809	1716675	.	+	0	gene_id	gene105922	Alias	PA1576	name	PA1576
chr	PseudoCAP	gene	1716682	1717023	.	-	0	gene_id	gene105924	Alias	PA1577	name	PA1577
chr	PseudoCAP	gene	1717139	1717894	.	+	0	gene_id	gene105926	Alias	PA1578	name	PA1578
chr	PseudoCAP	gene	1718386	1718994	.	+	0	gene_id	gene105928	Alias	PA1579	name	PA1579
chr	PseudoCAP	gene	1719109	1720395	.	-	0	gene_id	gene105930	Alias	PA1580	name	gltA
chr	PseudoCAP	gene	1720744	1721130	.	+	0	gene_id	gene105932	Alias	PA1581	name	sdhC
chr	PseudoCAP	gene	1721124	1721492	.	+	0	gene_id	gene105934	Alias	PA1582	name	sdhD
chr	PseudoCAP	gene	1721496	1723268	.	+	0	gene_id	gene105936	Alias	PA1583	name	sdhA
chr	PseudoCAP	gene	1723280	1723987	.	+	0	gene_id	gene105938	Alias	PA1584	name	sdhB
chr	PseudoCAP	gene	1724244	1727075	.	+	0	gene_id	gene105940	Alias	PA1585	name	sucA
chr	PseudoCAP	gene	1727118	1728347	.	+	0	gene_id	gene105942	Alias	PA1586	name	sucB
chr	PseudoCAP	gene	1728416	1729852	.	+	0	gene_id	gene105944	Alias	PA1587	name	lpdG
chr	PseudoCAP	gene	1730181	1731347	.	+	0	gene_id	gene105946	Alias	PA1588	name	sucC
chr	PseudoCAP	gene	1731347	1732234	.	+	0	gene_id	gene105948	Alias	PA1589	name	sucD
chr	PseudoCAP	gene	1732545	1733858	.	+	0	gene_id	gene105950	Alias	PA1590	name	braB
chr	PseudoCAP	gene	1734004	1734768	.	+	0	gene_id	gene105952	Alias	PA1591	name	PA1591
chr	PseudoCAP	gene	1734827	1735063	.	-	0	gene_id	gene105954	Alias	PA1592	name	PA1592
chr	PseudoCAP	gene	1735236	1735709	.	+	0	gene_id	gene105956	Alias	PA1593	name	PA1593
chr	PseudoCAP	gene	1735706	1736152	.	+	0	gene_id	gene105958	Alias	PA1594	name	PA1594
chr	PseudoCAP	gene	1736189	1737418	.	+	0	gene_id	gene105960	Alias	PA1595	name	PA1595
chr	PseudoCAP	gene	1737536	1739440	.	+	0	gene_id	gene105962	Alias	PA1596	name	htpG
chr	PseudoCAP	gene	1739508	1740233	.	+	0	gene_id	gene105964	Alias	PA1597	name	PA1597
chr	PseudoCAP	gene	1740244	1741065	.	-	0	gene_id	gene105966	Alias	PA1598	name	PA1598
chr	PseudoCAP	gene	1741146	1741928	.	+	0	gene_id	gene105968	Alias	PA1599	name	PA1599
chr	PseudoCAP	gene	1741939	1743240	.	-	0	gene_id	gene105970	Alias	PA1600	name	PA1600
chr	PseudoCAP	gene	1743290	1745536	.	-	0	gene_id	gene105972	Alias	PA1601	name	PA1601
chr	PseudoCAP	gene	1745533	1746024	.	-	0	gene_id	gene105974	Alias	PA1602	name	PA1602
chr	PseudoCAP	gene	1746231	1746653	.	-	0	gene_id	gene105976	Alias	PA1603	name	PA1603
chr	PseudoCAP	gene	1746692	1747597	.	-	0	gene_id	gene105978	Alias	PA1604	name	PA1604
chr	PseudoCAP	gene	1747596	1748630	.	+	0	gene_id	gene105980	Alias	PA1605	name	PA1605
chr	PseudoCAP	gene	1748699	1749175	.	+	0	gene_id	gene105982	Alias	PA1606	name	PA1606
chr	PseudoCAP	gene	1749349	1749789	.	-	0	gene_id	gene105984	Alias	PA1607	name	PA1607
chr	PseudoCAP	gene	1749895	1751520	.	-	0	gene_id	gene105986	Alias	PA1608	name	PA1608
chr	PseudoCAP	gene	1751674	1752891	.	-	0	gene_id	gene105988	Alias	PA1609	name	fabB
chr	PseudoCAP	gene	1752903	1753418	.	-	0	gene_id	gene105990	Alias	PA1610	name	fabA
chr	PseudoCAP	gene	1753607	1755562	.	-	0	gene_id	gene105992	Alias	PA1611	name	PA1611
chr	PseudoCAP	gene	1755559	1756317	.	-	0	gene_id	gene105994	Alias	PA1612	name	PA1612
chr	PseudoCAP	gene	1756489	1758597	.	-	0	gene_id	gene105996	Alias	PA1613	name	PA1613
chr	PseudoCAP	gene	1758748	1759770	.	+	0	gene_id	gene105998	Alias	PA1614	name	gpsA
chr	PseudoCAP	gene	1759784	1760125	.	+	0	gene_id	gene106000	Alias	PA1615	name	PA1615
chr	PseudoCAP	gene	1760122	1760586	.	+	0	gene_id	gene106002	Alias	PA1616	name	PA1616
chr	PseudoCAP	gene	1760713	1762380	.	+	0	gene_id	gene106004	Alias	PA1617	name	PA1617
chr	PseudoCAP	gene	1762433	1762870	.	+	0	gene_id	gene106006	Alias	PA1618	name	PA1618
chr	PseudoCAP	gene	1762928	1763752	.	+	0	gene_id	gene106008	Alias	PA1619	name	PA1619
chr	PseudoCAP	gene	1763793	1764434	.	+	0	gene_id	gene106010	Alias	PA1620	name	PA1620
chr	PseudoCAP	gene	1764536	1765348	.	+	0	gene_id	gene106012	Alias	PA1621	name	PA1621
chr	PseudoCAP	gene	1765345	1766205	.	+	0	gene_id	gene106014	Alias	PA1622	name	PA1622
chr	PseudoCAP	gene	1766285	1766947	.	+	0	gene_id	gene106016	Alias	PA1623	name	PA1623
chr	PseudoCAP	gene	1766956	1767762	.	+	0	gene_id	gene106018	Alias	PA1624	name	PA1624
chr	PseudoCAP	gene	1767928	1768995	.	+	0	gene_id	gene106020	Alias	PA1625	name	PA1625
chr	PseudoCAP	gene	1769047	1770321	.	-	0	gene_id	gene106022	Alias	PA1626	name	PA1626
chr	PseudoCAP	gene	1770337	1770984	.	-	0	gene_id	gene106024	Alias	PA1627	name	PA1627
chr	PseudoCAP	gene	1771122	1772651	.	-	0	gene_id	gene106026	Alias	PA1628	name	PA1628
chr	PseudoCAP	gene	1772655	1773440	.	-	0	gene_id	gene106028	Alias	PA1629	name	PA1629
chr	PseudoCAP	gene	1773682	1774548	.	+	0	gene_id	gene106030	Alias	PA1630	name	PA1630
chr	PseudoCAP	gene	1774603	1775757	.	+	0	gene_id	gene106032	Alias	PA1631	name	PA1631
chr	PseudoCAP	gene	1775945	1776034	.	+	0	gene_id	gene106034	Alias	PA1632	name	kdpF
chr	PseudoCAP	gene	1776045	1777739	.	+	0	gene_id	gene106036	Alias	PA1633	name	kdpA
chr	PseudoCAP	gene	1777751	1779823	.	+	0	gene_id	gene106038	Alias	PA1634	name	kdpB
chr	PseudoCAP	gene	1779877	1780428	.	+	0	gene_id	gene106040	Alias	PA1635	name	kdpC
chr	PseudoCAP	gene	1780536	1783193	.	+	0	gene_id	gene106042	Alias	PA1636	name	kdpD
chr	PseudoCAP	gene	1783294	1783986	.	+	0	gene_id	gene106044	Alias	PA1637	name	kdpE
chr	PseudoCAP	gene	1784108	1785016	.	+	0	gene_id	gene106046	Alias	PA1638	name	PA1638
chr	PseudoCAP	gene	1785127	1785732	.	+	0	gene_id	gene106048	Alias	PA1639	name	PA1639
chr	PseudoCAP	gene	1785736	1786773	.	-	0	gene_id	gene106050	Alias	PA1640	name	PA1640
chr	PseudoCAP	gene	1786888	1787166	.	+	0	gene_id	gene106052	Alias	PA1641	name	PA1641
chr	PseudoCAP	gene	1787250	1788284	.	+	0	gene_id	gene106054	Alias	PA1642	name	selD
chr	PseudoCAP	gene	1788284	1789393	.	+	0	gene_id	gene106056	Alias	PA1643	name	PA1643
chr	PseudoCAP	gene	1789857	1790465	.	+	0	gene_id	gene106058	Alias	PA1644	name	PA1644
chr	PseudoCAP	gene	1790472	1790879	.	-	0	gene_id	gene106060	Alias	PA1645	name	PA1645
chr	PseudoCAP	gene	1791080	1793038	.	+	0	gene_id	gene106062	Alias	PA1646	name	PA1646
chr	PseudoCAP	gene	1793019	1794740	.	-	0	gene_id	gene106064	Alias	PA1647	name	PA1647
chr	PseudoCAP	gene	1794883	1795887	.	-	0	gene_id	gene106066	Alias	PA1648	name	PA1648
chr	PseudoCAP	gene	1796138	1796899	.	+	0	gene_id	gene106068	Alias	PA1649	name	PA1649
chr	PseudoCAP	gene	1797058	1797951	.	+	0	gene_id	gene106070	Alias	PA1650	name	PA1650
chr	PseudoCAP	gene	1797958	1799154	.	-	0	gene_id	gene106072	Alias	PA1651	name	PA1651
chr	PseudoCAP	gene	1799385	1800020	.	+	0	gene_id	gene106074	Alias	PA1652	name	PA1652
chr	PseudoCAP	gene	1800071	1800547	.	-	0	gene_id	gene106076	Alias	PA1653	name	PA1653
chr	PseudoCAP	gene	1800629	1801795	.	+	0	gene_id	gene106078	Alias	PA1654	name	PA1654
chr	PseudoCAP	gene	1801851	1802453	.	+	0	gene_id	gene106080	Alias	PA1655	name	PA1655
chr	PseudoCAP	gene	1803626	1805182	.	+	0	gene_id	gene106082	Alias	PA1656	name	hsiA2
chr	PseudoCAP	gene	1805218	1805724	.	+	0	gene_id	gene106084	Alias	PA1657	name	hsiB2
chr	PseudoCAP	gene	1805753	1807228	.	+	0	gene_id	gene106086	Alias	PA1658	name	hsiC2
chr	PseudoCAP	gene	1807241	1807648	.	+	0	gene_id	gene106088	Alias	PA1659	name	hsiF2
chr	PseudoCAP	gene	1808193	1809773	.	+	0	gene_id	gene106090	Alias	PA1660	name	hsiG2
chr	PseudoCAP	gene	1809737	1810744	.	+	0	gene_id	gene106092	Alias	PA1661	name	hsiH2
chr	PseudoCAP	gene	1810751	1813384	.	+	0	gene_id	gene106094	Alias	PA1662	name	clpV2
chr	PseudoCAP	gene	1813395	1814906	.	+	0	gene_id	gene106096	Alias	PA1663	name	sfa2
chr	PseudoCAP	gene	1814995	1815135	.	+	0	gene_id	gene106098	Alias	PA1664	name	orfX
chr	PseudoCAP	gene	1815153	1816346	.	+	0	gene_id	gene106100	Alias	PA1665	name	fha2
chr	PseudoCAP	gene	1816352	1816858	.	+	0	gene_id	gene106102	Alias	PA1666	name	lip2
chr	PseudoCAP	gene	1816855	1818186	.	+	0	gene_id	gene106104	Alias	PA1667	name	hsiJ2
chr	PseudoCAP	gene	1818189	1819058	.	+	0	gene_id	gene106106	Alias	PA1668	name	dotU2
chr	PseudoCAP	gene	1819074	1822601	.	+	0	gene_id	gene106108	Alias	PA1669	name	icmF2
chr	PseudoCAP	gene	1822601	1823329	.	+	0	gene_id	gene106110	Alias	PA1670	name	stp1
chr	PseudoCAP	gene	1823326	1824315	.	+	0	gene_id	gene106112	Alias	PA1671	name	stk1
chr	PseudoCAP	gene	1824343	1824723	.	-	0	gene_id	gene106114	Alias	PA1672	name	PA1672
chr	PseudoCAP	gene	1824969	1825430	.	+	0	gene_id	gene106116	Alias	PA1673	name	PA1673
chr	PseudoCAP	gene	1825495	1826040	.	-	0	gene_id	gene106118	Alias	PA1674	name	folE2
chr	PseudoCAP	gene	1826118	1826675	.	-	0	gene_id	gene106120	Alias	PA1675	name	PA1675
chr	PseudoCAP	gene	1826732	1827052	.	-	0	gene_id	gene106122	Alias	PA1676	name	PA1676
chr	PseudoCAP	gene	1827225	1827821	.	-	0	gene_id	gene106124	Alias	PA1677	name	PA1677
chr	PseudoCAP	gene	1827992	1828906	.	+	0	gene_id	gene106126	Alias	PA1678	name	PA1678
chr	PseudoCAP	gene	1828931	1829710	.	-	0	gene_id	gene106128	Alias	PA1679	name	PA1679
chr	PseudoCAP	gene	1829788	1830771	.	-	0	gene_id	gene106130	Alias	PA1680	name	PA1680
chr	PseudoCAP	gene	1830879	1831970	.	+	0	gene_id	gene106132	Alias	PA1681	name	aroC
chr	PseudoCAP	gene	1832014	1833165	.	+	0	gene_id	gene106134	Alias	PA1682	name	PA1682
chr	PseudoCAP	gene	1833162	1833779	.	+	0	gene_id	gene106136	Alias	PA1683	name	PA1683
chr	PseudoCAP	gene	1833776	1834321	.	+	0	gene_id	gene106138	Alias	PA1684	name	PA1684
chr	PseudoCAP	gene	1834393	1835142	.	+	0	gene_id	gene106140	Alias	PA1685	name	masA
chr	PseudoCAP	gene	1835325	1836218	.	-	0	gene_id	gene106142	Alias	PA1686	name	alkA
chr	PseudoCAP	gene	1836367	1837227	.	+	0	gene_id	gene106144	Alias	PA1687	name	speE
chr	PseudoCAP	gene	1837388	1838257	.	+	0	gene_id	gene106146	Alias	PA1688	name	PA1688
chr	PseudoCAP	gene	1838260	1840362	.	+	0	gene_id	gene106148	Alias	PA1689	name	PA1689
chr	PseudoCAP	gene	1840468	1841517	.	-	0	gene_id	gene106150	Alias	PA1690	name	pscU
chr	PseudoCAP	gene	1841514	1842302	.	-	0	gene_id	gene106152	Alias	PA1691	name	pscT
chr	PseudoCAP	gene	1842299	1842565	.	-	0	gene_id	gene106154	Alias	PA1692	name	PA1692
chr	PseudoCAP	gene	1842568	1843221	.	-	0	gene_id	gene106156	Alias	PA1693	name	pscR
chr	PseudoCAP	gene	1843218	1844147	.	-	0	gene_id	gene106158	Alias	PA1694	name	pscQ
chr	PseudoCAP	gene	1844144	1845253	.	-	0	gene_id	gene106160	Alias	PA1695	name	pscP
chr	PseudoCAP	gene	1845241	1845717	.	-	0	gene_id	gene106162	Alias	PA1696	name	pscO
chr	PseudoCAP	gene	1845714	1847036	.	-	0	gene_id	gene106164	Alias	PA1697	name	PA1697
chr	PseudoCAP	gene	1847227	1848093	.	+	0	gene_id	gene106166	Alias	PA1698	name	popN
chr	PseudoCAP	gene	1848074	1848352	.	+	0	gene_id	gene106168	Alias	PA1699	name	pcr1
chr	PseudoCAP	gene	1848339	1848710	.	+	0	gene_id	gene106170	Alias	PA1700	name	pcr2
chr	PseudoCAP	gene	1848707	1849072	.	+	0	gene_id	gene106172	Alias	PA1701	name	pcr3
chr	PseudoCAP	gene	1849077	1849406	.	+	0	gene_id	gene106174	Alias	PA1702	name	pcr4
chr	PseudoCAP	gene	1849403	1851523	.	+	0	gene_id	gene106176	Alias	PA1703	name	pcrD
chr	PseudoCAP	gene	1851520	1851954	.	+	0	gene_id	gene106178	Alias	PA1704	name	pcrR
chr	PseudoCAP	gene	1851982	1852278	.	+	0	gene_id	gene106180	Alias	PA1705	name	pcrG
chr	PseudoCAP	gene	1852288	1853172	.	+	0	gene_id	gene106182	Alias	PA1706	name	pcrV
chr	PseudoCAP	gene	1853181	1853684	.	+	0	gene_id	gene106184	Alias	PA1707	name	pcrH
chr	PseudoCAP	gene	1853665	1854837	.	+	0	gene_id	gene106186	Alias	PA1708	name	popB
chr	PseudoCAP	gene	1854849	1855736	.	+	0	gene_id	gene106188	Alias	PA1709	name	popD
chr	PseudoCAP	gene	1855862	1856299	.	+	0	gene_id	gene106190	Alias	PA1710	name	exsC
chr	PseudoCAP	gene	1856308	1856553	.	+	0	gene_id	gene106192	Alias	PA1711	name	exsE
chr	PseudoCAP	gene	1856562	1856975	.	+	0	gene_id	gene106194	Alias	PA1712	name	exsB
chr	PseudoCAP	gene	1857273	1858109	.	+	0	gene_id	gene106196	Alias	PA1713	name	exsA
chr	PseudoCAP	gene	1858207	1859037	.	+	0	gene_id	gene106198	Alias	PA1714	name	exsD
chr	PseudoCAP	gene	1859071	1859493	.	+	0	gene_id	gene106200	Alias	PA1715	name	pscB
chr	PseudoCAP	gene	1859493	1861295	.	+	0	gene_id	gene106202	Alias	PA1716	name	pscC
chr	PseudoCAP	gene	1861297	1862595	.	+	0	gene_id	gene106204	Alias	PA1717	name	pscD
chr	PseudoCAP	gene	1862558	1862761	.	+	0	gene_id	gene106206	Alias	PA1718	name	pscE
chr	PseudoCAP	gene	1862764	1863021	.	+	0	gene_id	gene106208	Alias	PA1719	name	pscF
chr	PseudoCAP	gene	1863024	1863371	.	+	0	gene_id	gene106210	Alias	PA1720	name	pscG
chr	PseudoCAP	gene	1863368	1863799	.	+	0	gene_id	gene106212	Alias	PA1721	name	pscH
chr	PseudoCAP	gene	1863799	1864137	.	+	0	gene_id	gene106214	Alias	PA1722	name	pscI
chr	PseudoCAP	gene	1864134	1864880	.	+	0	gene_id	gene106216	Alias	PA1723	name	pscJ
chr	PseudoCAP	gene	1864889	1865515	.	+	0	gene_id	gene106218	Alias	PA1724	name	pscK
chr	PseudoCAP	gene	1865494	1866138	.	+	0	gene_id	gene106220	Alias	PA1725	name	pscL
chr	PseudoCAP	gene	1866241	1868535	.	-	0	gene_id	gene106222	Alias	PA1726	name	bglX
chr	PseudoCAP	gene	1868706	1870763	.	-	0	gene_id	gene106224	Alias	PA1727	name	mucR
chr	PseudoCAP	gene	1871116	1871457	.	+	0	gene_id	gene106226	Alias	PA1728	name	PA1728
chr	PseudoCAP	gene	1871555	1872202	.	+	0	gene_id	gene106228	Alias	PA1729	name	PA1729
chr	PseudoCAP	gene	1872602	1874014	.	+	0	gene_id	gene106230	Alias	PA1730	name	PA1730
chr	PseudoCAP	gene	1874017	1874970	.	+	0	gene_id	gene106232	Alias	PA1731	name	PA1731
chr	PseudoCAP	gene	1874967	1875767	.	+	0	gene_id	gene106234	Alias	PA1732	name	PA1732
chr	PseudoCAP	gene	1875849	1876580	.	+	0	gene_id	gene106236	Alias	PA1733	name	PA1733
chr	PseudoCAP	gene	1876588	1877409	.	-	0	gene_id	gene106238	Alias	PA1734	name	PA1734
chr	PseudoCAP	gene	1877522	1878409	.	+	0	gene_id	gene106240	Alias	PA1735	name	PA1735
chr	PseudoCAP	gene	1878980	1880185	.	+	0	gene_id	gene106242	Alias	PA1736	name	PA1736
chr	PseudoCAP	gene	1880199	1882343	.	+	0	gene_id	gene106244	Alias	PA1737	name	PA1737
chr	PseudoCAP	gene	1882595	1883509	.	-	0	gene_id	gene106246	Alias	PA1738	name	PA1738
chr	PseudoCAP	gene	1883661	1884632	.	+	0	gene_id	gene106248	Alias	PA1739	name	PA1739
chr	PseudoCAP	gene	1884655	1885653	.	+	0	gene_id	gene106250	Alias	PA1740	name	PA1740
chr	PseudoCAP	gene	1885662	1886033	.	-	0	gene_id	gene106252	Alias	PA1741	name	PA1741
chr	PseudoCAP	gene	1886278	1887000	.	+	0	gene_id	gene106254	Alias	PA1742	name	pauD2
chr	PseudoCAP	gene	1887058	1887297	.	-	0	gene_id	gene106256	Alias	PA1743	name	PA1743
chr	PseudoCAP	gene	1887325	1887543	.	-	0	gene_id	gene106258	Alias	PA1744	name	PA1744
chr	PseudoCAP	gene	1887698	1888186	.	-	0	gene_id	gene106260	Alias	PA1745	name	PA1745
chr	PseudoCAP	gene	1888407	1888913	.	+	0	gene_id	gene106262	Alias	PA1746	name	PA1746
chr	PseudoCAP	gene	1888985	1889173	.	-	0	gene_id	gene106264	Alias	PA1747	name	PA1747
chr	PseudoCAP	gene	1889323	1890012	.	-	0	gene_id	gene106266	Alias	PA1748	name	PA1748
chr	PseudoCAP	gene	1890196	1890681	.	+	0	gene_id	gene106268	Alias	PA1749	name	PA1749
chr	PseudoCAP	gene	1890739	1891815	.	-	0	gene_id	gene106270	Alias	PA1750	name	PA1750
chr	PseudoCAP	gene	1892133	1892510	.	+	0	gene_id	gene106272	Alias	PA1751	name	PA1751
chr	PseudoCAP	gene	1892510	1893457	.	+	0	gene_id	gene106274	Alias	PA1752	name	PA1752
chr	PseudoCAP	gene	1893620	1894117	.	+	0	gene_id	gene106276	Alias	PA1753	name	PA1753
chr	PseudoCAP	gene	1894249	1895223	.	+	0	gene_id	gene106278	Alias	PA1754	name	cysB
chr	PseudoCAP	gene	1895280	1895627	.	-	0	gene_id	gene106280	Alias	PA1755	name	PA1755
chr	PseudoCAP	gene	1895692	1896495	.	-	0	gene_id	gene106282	Alias	PA1756	name	cysH
chr	PseudoCAP	gene	1896630	1897247	.	+	0	gene_id	gene106284	Alias	PA1757	name	thrH
chr	PseudoCAP	gene	1897290	1898651	.	-	0	gene_id	gene106286	Alias	PA1758	name	pabB
chr	PseudoCAP	gene	1898816	1901521	.	+	0	gene_id	gene106288	Alias	PA1759	name	PA1759
chr	PseudoCAP	gene	1901524	1904247	.	+	0	gene_id	gene106290	Alias	PA1760	name	PA1760
chr	PseudoCAP	gene	1904479	1904916	.	+	0	gene_id	gene106292	Alias	PA1761	name	PA1761
chr	PseudoCAP	gene	1904995	1905756	.	+	0	gene_id	gene106294	Alias	PA1762	name	PA1762
chr	PseudoCAP	gene	1905797	1906822	.	+	0	gene_id	gene106296	Alias	PA1763	name	PA1763
chr	PseudoCAP	gene	1906842	1908440	.	+	0	gene_id	gene106298	Alias	PA1764	name	PA1764
chr	PseudoCAP	gene	1908454	1909641	.	+	0	gene_id	gene106300	Alias	PA1765	name	PA1765
chr	PseudoCAP	gene	1909698	1910681	.	-	0	gene_id	gene106302	Alias	PA1766	name	PA1766
chr	PseudoCAP	gene	1910685	1912211	.	-	0	gene_id	gene106304	Alias	PA1767	name	PA1767
chr	PseudoCAP	gene	1912217	1912756	.	-	0	gene_id	gene106306	Alias	PA1768	name	PA1768
chr	PseudoCAP	gene	1913047	1913871	.	-	0	gene_id	gene106308	Alias	PA1769	name	PA1769
chr	PseudoCAP	gene	1914037	1916412	.	+	0	gene_id	gene106310	Alias	PA1770	name	ppsA
chr	PseudoCAP	gene	1916482	1917492	.	+	0	gene_id	gene106312	Alias	PA1771	name	estX
chr	PseudoCAP	gene	1917599	1918087	.	+	0	gene_id	gene106314	Alias	PA1772	name	PA1772
chr	PseudoCAP	gene	1918275	1919273	.	+	0	gene_id	gene106316	Alias	PA1773	name	cmaX
chr	PseudoCAP	gene	1919322	1919576	.	+	0	gene_id	gene106318	Alias	PA1774	name	crfX
chr	PseudoCAP	gene	1919579	1920403	.	+	0	gene_id	gene106320	Alias	PA1775	name	cmpX
chr	PseudoCAP	gene	1920568	1921065	.	+	0	gene_id	gene106322	Alias	PA1776	name	sigX
chr	PseudoCAP	gene	1921174	1922226	.	+	0	gene_id	gene106324	Alias	PA1777	name	oprF
chr	PseudoCAP	gene	1922295	1923032	.	-	0	gene_id	gene106326	Alias	PA1778	name	cobA
chr	PseudoCAP	gene	1923044	1925770	.	-	0	gene_id	gene106328	Alias	PA1779	name	PA1779
chr	PseudoCAP	gene	1925797	1926123	.	-	0	gene_id	gene106330	Alias	PA1780	name	nirD
chr	PseudoCAP	gene	1926176	1928626	.	-	0	gene_id	gene106332	Alias	PA1781	name	nirB
chr	PseudoCAP	gene	1928666	1928886	.	-	0	gene_id	gene191111	Alias	PA1781.1	name	nalA
chr	PseudoCAP	gene	1928894	1930489	.	-	0	gene_id	gene106334	Alias	PA1782	name	PA1782
chr	PseudoCAP	gene	1930564	1931775	.	-	0	gene_id	gene106336	Alias	PA1783	name	nasA
chr	PseudoCAP	gene	1932129	1932824	.	-	0	gene_id	gene106338	Alias	PA1784	name	PA1784
chr	PseudoCAP	gene	1933054	1933632	.	-	0	gene_id	gene106340	Alias	PA1785	name	nasT
chr	PseudoCAP	gene	1933649	1934857	.	-	0	gene_id	gene106342	Alias	PA1786	name	nasS
chr	PseudoCAP	gene	1935035	1937644	.	-	0	gene_id	gene106344	Alias	PA1787	name	acnB
chr	PseudoCAP	gene	1938026	1938493	.	+	0	gene_id	gene106346	Alias	PA1788	name	PA1788
chr	PseudoCAP	gene	1938549	1939412	.	-	0	gene_id	gene106348	Alias	PA1789	name	PA1789
chr	PseudoCAP	gene	1939583	1940206	.	+	0	gene_id	gene106350	Alias	PA1790	name	PA1790
chr	PseudoCAP	gene	1940255	1941586	.	-	0	gene_id	gene106352	Alias	PA1791	name	PA1791
chr	PseudoCAP	gene	1941720	1942442	.	-	0	gene_id	gene106354	Alias	PA1792	name	PA1792
chr	PseudoCAP	gene	1942447	1942944	.	-	0	gene_id	gene106356	Alias	PA1793	name	ppiB
chr	PseudoCAP	gene	1943067	1944737	.	+	0	gene_id	gene106358	Alias	PA1794	name	glnS
chr	PseudoCAP	gene	1944747	1946129	.	+	0	gene_id	gene106360	Alias	PA1795	name	cysS
chr	PseudoCAP	gene	1946187	1947041	.	-	0	gene_id	gene106362	Alias	PA1796	name	folD
chr	PseudoCAP	gene	1947320	1947396	.	+	0	gene_id	gene106364	Alias	PA1796.1	name	PA1796.1
chr	PseudoCAP	gene	1947448	1947523	.	+	0	gene_id	gene106366	Alias	PA1796.2	name	PA1796.2
chr	PseudoCAP	gene	1947578	1947662	.	+	0	gene_id	gene106368	Alias	PA1796.3	name	PA1796.3
chr	PseudoCAP	gene	1947729	1947804	.	+	0	gene_id	gene106370	Alias	PA1796.4	name	PA1796.4
chr	PseudoCAP	gene	1948502	1950334	.	-	0	gene_id	gene106372	Alias	PA1797	name	PA1797
chr	PseudoCAP	gene	1950439	1951725	.	-	0	gene_id	gene106374	Alias	PA1798	name	parS
chr	PseudoCAP	gene	1951726	1952433	.	-	0	gene_id	gene106376	Alias	PA1799	name	parR
chr	PseudoCAP	gene	1952665	1953975	.	+	0	gene_id	gene106378	Alias	PA1800	name	tig
chr	PseudoCAP	gene	1954069	1954710	.	+	0	gene_id	gene106380	Alias	PA1801	name	clpP
chr	PseudoCAP	gene	1954815	1956095	.	+	0	gene_id	gene106382	Alias	PA1802	name	clpX
chr	PseudoCAP	gene	1956227	1958623	.	+	0	gene_id	gene106384	Alias	PA1803	name	lon
chr	PseudoCAP	gene	1958759	1959031	.	+	0	gene_id	gene106386	Alias	PA1804	name	hupB
chr	PseudoCAP	gene	1959083	1959159	.	+	0	gene_id	gene106388	Alias	PA1804.1	name	PA1804.1
chr	PseudoCAP	gene	1959263	1961128	.	+	0	gene_id	gene106390	Alias	PA1805	name	ppiD
chr	PseudoCAP	gene	1961227	1962024	.	-	0	gene_id	gene106392	Alias	PA1806	name	fabI
chr	PseudoCAP	gene	1962046	1963656	.	-	0	gene_id	gene106394	Alias	PA1807	name	PA1807
chr	PseudoCAP	gene	1963658	1964677	.	-	0	gene_id	gene106396	Alias	PA1808	name	PA1808
chr	PseudoCAP	gene	1964682	1965764	.	-	0	gene_id	gene106398	Alias	PA1809	name	PA1809
chr	PseudoCAP	gene	1965771	1967618	.	-	0	gene_id	gene106400	Alias	PA1810	name	PA1810
chr	PseudoCAP	gene	1967615	1969444	.	-	0	gene_id	gene106402	Alias	PA1811	name	PA1811
chr	PseudoCAP	gene	1969635	1971239	.	-	0	gene_id	gene106404	Alias	PA1812	name	mltD
chr	PseudoCAP	gene	1971317	1972093	.	-	0	gene_id	gene106406	Alias	PA1813	name	PA1813
chr	PseudoCAP	gene	1972195	1972956	.	+	0	gene_id	gene106408	Alias	PA1814	name	kerV
chr	PseudoCAP	gene	1972959	1973405	.	+	0	gene_id	gene106410	Alias	PA1815	name	rnhA
chr	PseudoCAP	gene	1973470	1974210	.	+	0	gene_id	gene106412	Alias	PA1816	name	dnaQ
chr	PseudoCAP	gene	1974238	1974627	.	-	0	gene_id	gene106414	Alias	PA1817	name	PA1817
chr	PseudoCAP	gene	1974821	1977076	.	+	0	gene_id	gene106416	Alias	PA1818	name	ldcA
chr	PseudoCAP	gene	1977100	1978455	.	+	0	gene_id	gene106418	Alias	PA1819	name	PA1819
chr	PseudoCAP	gene	1978439	1979941	.	-	0	gene_id	gene106420	Alias	PA1820	name	nhaB
chr	PseudoCAP	gene	1980165	1980977	.	+	0	gene_id	gene106422	Alias	PA1821	name	PA1821
chr	PseudoCAP	gene	1981017	1982705	.	+	0	gene_id	gene106424	Alias	PA1822	name	fimL
chr	PseudoCAP	gene	1982705	1983541	.	+	0	gene_id	gene106426	Alias	PA1823	name	PA1823
chr	PseudoCAP	gene	1983509	1984288	.	-	0	gene_id	gene106428	Alias	PA1824	name	PA1824
chr	PseudoCAP	gene	1984389	1985033	.	+	0	gene_id	gene106430	Alias	PA1825	name	PA1825
chr	PseudoCAP	gene	1985030	1985935	.	-	0	gene_id	gene106432	Alias	PA1826	name	PA1826
chr	PseudoCAP	gene	1986067	1986828	.	+	0	gene_id	gene106434	Alias	PA1827	name	PA1827
chr	PseudoCAP	gene	1986989	1987756	.	-	0	gene_id	gene106436	Alias	PA1828	name	PA1828
chr	PseudoCAP	gene	1987781	1988851	.	-	0	gene_id	gene106438	Alias	PA1829	name	PA1829
chr	PseudoCAP	gene	1989109	1989423	.	-	0	gene_id	gene106440	Alias	PA1830	name	PA1830
chr	PseudoCAP	gene	1989484	1990194	.	-	0	gene_id	gene106442	Alias	PA1831	name	PA1831
chr	PseudoCAP	gene	1990428	1991453	.	+	0	gene_id	gene106444	Alias	PA1832	name	PA1832
chr	PseudoCAP	gene	1991512	1992504	.	+	0	gene_id	gene106446	Alias	PA1833	name	PA1833
chr	PseudoCAP	gene	1992584	1993474	.	+	0	gene_id	gene106448	Alias	PA1834	name	PA1834
chr	PseudoCAP	gene	1993461	1993898	.	-	0	gene_id	gene106450	Alias	PA1835	name	PA1835
chr	PseudoCAP	gene	1994021	1994602	.	+	0	gene_id	gene106452	Alias	PA1836	name	PA1836
chr	PseudoCAP	gene	1994667	1995164	.	-	0	gene_id	gene106454	Alias	PA1837	name	PA1837
chr	PseudoCAP	gene	1995148	1996806	.	-	0	gene_id	gene106456	Alias	PA1838	name	cysI
chr	PseudoCAP	gene	1997509	1998549	.	-	0	gene_id	gene106458	Alias	PA1839	name	PA1839
chr	PseudoCAP	gene	1998587	1998949	.	+	0	gene_id	gene106460	Alias	PA1840	name	PA1840
chr	PseudoCAP	gene	1998963	1999460	.	+	0	gene_id	gene106462	Alias	PA1841	name	PA1841
chr	PseudoCAP	gene	1999512	1999874	.	-	0	gene_id	gene106464	Alias	PA1842	name	PA1842
chr	PseudoCAP	gene	1999889	2003593	.	-	0	gene_id	gene106466	Alias	PA1843	name	metH
chr	PseudoCAP	gene	2003868	2004332	.	-	0	gene_id	gene106468	Alias	PA1844	name	tse1
chr	PseudoCAP	gene	2004374	2004892	.	-	0	gene_id	gene106470	Alias	PA1845	name	PA1845
chr	PseudoCAP	gene	2005254	2007542	.	+	0	gene_id	gene106472	Alias	PA1846	name	cti
chr	PseudoCAP	gene	2007665	2008249	.	+	0	gene_id	gene106474	Alias	PA1847	name	nfuA
chr	PseudoCAP	gene	2008308	2009477	.	-	0	gene_id	gene106476	Alias	PA1848	name	PA1848
chr	PseudoCAP	gene	2009482	2009724	.	-	0	gene_id	gene106478	Alias	PA1849	name	PA1849
chr	PseudoCAP	gene	2009747	2010751	.	-	0	gene_id	gene106480	Alias	PA1850	name	PA1850
chr	PseudoCAP	gene	2011000	2012205	.	+	0	gene_id	gene106482	Alias	PA1851	name	PA1851
chr	PseudoCAP	gene	2012255	2012530	.	-	0	gene_id	gene106484	Alias	PA1852	name	PA1852
chr	PseudoCAP	gene	2012815	2013678	.	+	0	gene_id	gene106486	Alias	PA1853	name	PA1853
chr	PseudoCAP	gene	2013666	2014823	.	-	0	gene_id	gene106488	Alias	PA1854	name	PA1854
chr	PseudoCAP	gene	2014915	2015136	.	-	0	gene_id	gene106490	Alias	PA1855	name	PA1855
chr	PseudoCAP	gene	2015139	2016581	.	-	0	gene_id	gene106492	Alias	PA1856	name	PA1856
chr	PseudoCAP	gene	2016928	2017851	.	-	0	gene_id	gene106494	Alias	PA1857	name	PA1857
chr	PseudoCAP	gene	2017967	2018794	.	-	0	gene_id	gene106496	Alias	PA1858	name	str
chr	PseudoCAP	gene	2018803	2019690	.	-	0	gene_id	gene106498	Alias	PA1859	name	PA1859
chr	PseudoCAP	gene	2019776	2020603	.	+	0	gene_id	gene106500	Alias	PA1860	name	PA1860
chr	PseudoCAP	gene	2020625	2021710	.	-	0	gene_id	gene106502	Alias	PA1861	name	modC
chr	PseudoCAP	gene	2021712	2022398	.	-	0	gene_id	gene106504	Alias	PA1862	name	modB
chr	PseudoCAP	gene	2022411	2023166	.	-	0	gene_id	gene106506	Alias	PA1863	name	modA
chr	PseudoCAP	gene	2023281	2023931	.	-	0	gene_id	gene106508	Alias	PA1864	name	PA1864
chr	PseudoCAP	gene	2024065	2025744	.	+	0	gene_id	gene106510	Alias	PA1865	name	PA1865
chr	PseudoCAP	gene	2025737	2028013	.	+	0	gene_id	gene106512	Alias	PA1866	name	PA1866
chr	PseudoCAP	gene	2028454	2028981	.	+	0	gene_id	gene106514	Alias	PA1867	name	xphA
chr	PseudoCAP	gene	2028968	2031298	.	+	0	gene_id	gene106516	Alias	PA1868	name	xqhA
chr	PseudoCAP	gene	2031466	2031705	.	+	0	gene_id	gene106518	Alias	PA1869	name	PA1869
chr	PseudoCAP	gene	2031988	2032413	.	+	0	gene_id	gene106520	Alias	PA1870	name	PA1870
chr	PseudoCAP	gene	2032695	2033951	.	+	0	gene_id	gene106522	Alias	PA1871	name	lasA
chr	PseudoCAP	gene	2034066	2034857	.	-	0	gene_id	gene106524	Alias	PA1872	name	PA1872
chr	PseudoCAP	gene	2034918	2035940	.	-	0	gene_id	gene106526	Alias	PA1873	name	PA1873
chr	PseudoCAP	gene	2036441	2043847	.	+	0	gene_id	gene106528	Alias	PA1874	name	PA1874
chr	PseudoCAP	gene	2043847	2045124	.	+	0	gene_id	gene106530	Alias	PA1875	name	PA1875
chr	PseudoCAP	gene	2045114	2047285	.	+	0	gene_id	gene106532	Alias	PA1876	name	PA1876
chr	PseudoCAP	gene	2047275	2048462	.	+	0	gene_id	gene106534	Alias	PA1877	name	PA1877
chr	PseudoCAP	gene	2048570	2049148	.	-	0	gene_id	gene106536	Alias	PA1878	name	PA1878
chr	PseudoCAP	gene	2049237	2049791	.	-	0	gene_id	gene106538	Alias	PA1879	name	PA1879
chr	PseudoCAP	gene	2049949	2052144	.	-	0	gene_id	gene106540	Alias	PA1880	name	PA1880
chr	PseudoCAP	gene	2052149	2052610	.	-	0	gene_id	gene106542	Alias	PA1881	name	PA1881
chr	PseudoCAP	gene	2052941	2053264	.	+	0	gene_id	gene106544	Alias	PA1882	name	PA1882
chr	PseudoCAP	gene	2053277	2053675	.	+	0	gene_id	gene106546	Alias	PA1883	name	PA1883
chr	PseudoCAP	gene	2053672	2054223	.	-	0	gene_id	gene106548	Alias	PA1884	name	PA1884
chr	PseudoCAP	gene	2054309	2054842	.	+	0	gene_id	gene106550	Alias	PA1885	name	PA1885
chr	PseudoCAP	gene	2054911	2057274	.	+	0	gene_id	gene106552	Alias	PA1886	name	polB
chr	PseudoCAP	gene	2057278	2057946	.	-	0	gene_id	gene106554	Alias	PA1887	name	PA1887
chr	PseudoCAP	gene	2057930	2059339	.	-	0	gene_id	gene106556	Alias	PA1888	name	PA1888
chr	PseudoCAP	gene	2059569	2060552	.	+	0	gene_id	gene106558	Alias	PA1889	name	PA1889
chr	PseudoCAP	gene	2060566	2061189	.	-	0	gene_id	gene106560	Alias	PA1890	name	PA1890
chr	PseudoCAP	gene	2061278	2061667	.	-	0	gene_id	gene106562	Alias	PA1891	name	PA1891
chr	PseudoCAP	gene	2061664	2062401	.	-	0	gene_id	gene106564	Alias	PA1892	name	PA1892
chr	PseudoCAP	gene	2062398	2064827	.	-	0	gene_id	gene106566	Alias	PA1893	name	PA1893
chr	PseudoCAP	gene	2064853	2065545	.	-	0	gene_id	gene106568	Alias	PA1894	name	PA1894
chr	PseudoCAP	gene	2065493	2066767	.	-	0	gene_id	gene106570	Alias	PA1895	name	PA1895
chr	PseudoCAP	gene	2066786	2067955	.	-	0	gene_id	gene106572	Alias	PA1896	name	PA1896
chr	PseudoCAP	gene	2067961	2068728	.	-	0	gene_id	gene106574	Alias	PA1897	name	PA1897
chr	PseudoCAP	gene	2069490	2070203	.	+	0	gene_id	gene106576	Alias	PA1898	name	qscR
chr	PseudoCAP	gene	2070685	2071173	.	+	0	gene_id	gene106578	Alias	PA1899	name	phzA2
chr	PseudoCAP	gene	2071209	2071697	.	+	0	gene_id	gene106580	Alias	PA1900	name	phzB2
chr	PseudoCAP	gene	2071721	2072938	.	+	0	gene_id	gene106582	Alias	PA1901	name	phzC2
chr	PseudoCAP	gene	2072935	2073558	.	+	0	gene_id	gene106584	Alias	PA1902	name	phzD2
chr	PseudoCAP	gene	2073555	2075438	.	+	0	gene_id	gene106586	Alias	PA1903	name	phzE2
chr	PseudoCAP	gene	2075452	2076288	.	+	0	gene_id	gene106588	Alias	PA1904	name	phzF2
chr	PseudoCAP	gene	2076311	2076958	.	+	0	gene_id	gene106590	Alias	PA1905	name	phzG2
chr	PseudoCAP	gene	2077047	2077583	.	-	0	gene_id	gene106592	Alias	PA1906	name	PA1906
chr	PseudoCAP	gene	2077626	2079266	.	-	0	gene_id	gene106594	Alias	PA1907	name	PA1907
chr	PseudoCAP	gene	2079263	2080474	.	-	0	gene_id	gene106596	Alias	PA1908	name	PA1908
chr	PseudoCAP	gene	2080661	2081812	.	-	0	gene_id	gene106598	Alias	PA1909	name	PA1909
chr	PseudoCAP	gene	2081853	2084267	.	-	0	gene_id	gene106600	Alias	PA1910	name	femA
chr	PseudoCAP	gene	2084476	2085426	.	-	0	gene_id	gene106602	Alias	PA1911	name	femR
chr	PseudoCAP	gene	2085423	2085929	.	-	0	gene_id	gene106604	Alias	PA1912	name	femI
chr	PseudoCAP	gene	2086021	2086701	.	-	0	gene_id	gene106606	Alias	PA1913	name	PA1913
chr	PseudoCAP	gene	2086808	2088034	.	-	0	gene_id	gene106608	Alias	PA1914	name	PA1914
chr	PseudoCAP	gene	2088602	2090149	.	-	0	gene_id	gene106610	Alias	PA1915	name	PA1915
chr	PseudoCAP	gene	2090213	2091445	.	-	0	gene_id	gene106612	Alias	PA1916	name	PA1916
chr	PseudoCAP	gene	2091490	2091837	.	-	0	gene_id	gene106614	Alias	PA1917	name	PA1917
chr	PseudoCAP	gene	2091850	2093250	.	-	0	gene_id	gene106616	Alias	PA1918	name	PA1918
chr	PseudoCAP	gene	2093444	2094142	.	-	0	gene_id	gene106618	Alias	PA1919	name	nrdG
chr	PseudoCAP	gene	2094329	2096356	.	-	0	gene_id	gene106620	Alias	PA1920	name	nrdD
chr	PseudoCAP	gene	2096514	2097323	.	-	0	gene_id	gene106622	Alias	PA1921	name	PA1921
chr	PseudoCAP	gene	2097491	2099452	.	+	0	gene_id	gene106624	Alias	PA1922	name	PA1922
chr	PseudoCAP	gene	2099452	2103297	.	+	0	gene_id	gene106626	Alias	PA1923	name	PA1923
chr	PseudoCAP	gene	2103294	2103770	.	+	0	gene_id	gene106628	Alias	PA1924	name	PA1924
chr	PseudoCAP	gene	2103770	2104096	.	+	0	gene_id	gene106630	Alias	PA1925	name	PA1925
chr	PseudoCAP	gene	2104597	2106447	.	+	0	gene_id	gene106632	Alias	PA1926	name	PA1926
chr	PseudoCAP	gene	2106580	2108880	.	+	0	gene_id	gene106634	Alias	PA1927	name	metE
chr	PseudoCAP	gene	2108942	2109511	.	-	0	gene_id	gene106636	Alias	PA1928	name	rimJ
chr	PseudoCAP	gene	2109558	2109854	.	-	0	gene_id	gene106638	Alias	PA1929	name	PA1929
chr	PseudoCAP	gene	2110226	2111521	.	+	0	gene_id	gene106640	Alias	PA1930	name	PA1930
chr	PseudoCAP	gene	2111691	2112203	.	+	0	gene_id	gene106642	Alias	PA1931	name	PA1931
chr	PseudoCAP	gene	2112200	2113189	.	+	0	gene_id	gene106644	Alias	PA1932	name	PA1932
chr	PseudoCAP	gene	2113186	2115390	.	+	0	gene_id	gene106646	Alias	PA1933	name	PA1933
chr	PseudoCAP	gene	2115885	2116265	.	+	0	gene_id	gene106648	Alias	PA1934	name	PA1934
chr	PseudoCAP	gene	2117030	2117734	.	-	0	gene_id	gene106650	Alias	PA1935	name	PA1935
chr	PseudoCAP	gene	2117897	2118097	.	+	0	gene_id	gene106652	Alias	PA1936	name	PA1936
chr	PseudoCAP	gene	2118585	2118893	.	+	0	gene_id	gene106654	Alias	PA1937	name	PA1937
chr	PseudoCAP	gene	2118926	2119747	.	+	0	gene_id	gene106656	Alias	PA1938	name	PA1938
chr	PseudoCAP	gene	2120225	2122222	.	-	0	gene_id	gene106658	Alias	PA1939	name	PA1939
chr	PseudoCAP	gene	2122579	2123718	.	-	0	gene_id	gene106660	Alias	PA1940	name	PA1940
chr	PseudoCAP	gene	2123897	2125792	.	-	0	gene_id	gene106662	Alias	PA1941	name	PA1941
chr	PseudoCAP	gene	2126104	2126334	.	-	0	gene_id	gene106664	Alias	PA1942	name	PA1942
chr	PseudoCAP	gene	2126396	2127493	.	-	0	gene_id	gene106666	Alias	PA1943	name	PA1943
chr	PseudoCAP	gene	2127684	2129171	.	+	0	gene_id	gene106668	Alias	PA1944	name	PA1944
chr	PseudoCAP	gene	2129307	2130635	.	+	0	gene_id	gene106670	Alias	PA1945	name	PA1945
chr	PseudoCAP	gene	2130854	2131813	.	+	0	gene_id	gene106672	Alias	PA1946	name	rbsB
chr	PseudoCAP	gene	2131835	2133367	.	+	0	gene_id	gene106674	Alias	PA1947	name	rbsA
chr	PseudoCAP	gene	2133391	2134389	.	+	0	gene_id	gene106676	Alias	PA1948	name	rbsC
chr	PseudoCAP	gene	2134393	2135406	.	+	0	gene_id	gene106678	Alias	PA1949	name	rbsR
chr	PseudoCAP	gene	2135460	2136386	.	+	0	gene_id	gene106680	Alias	PA1950	name	rbsK
chr	PseudoCAP	gene	2136520	2137785	.	-	0	gene_id	gene106682	Alias	PA1951	name	PA1951
chr	PseudoCAP	gene	2137846	2138598	.	-	0	gene_id	gene106684	Alias	PA1952	name	PA1952
chr	PseudoCAP	gene	2138612	2139292	.	-	0	gene_id	gene106686	Alias	PA1953	name	PA1953
chr	PseudoCAP	gene	2139354	2140376	.	-	0	gene_id	gene106688	Alias	PA1954	name	PA1954
chr	PseudoCAP	gene	2140433	2141002	.	-	0	gene_id	gene106690	Alias	PA1955	name	PA1955
chr	PseudoCAP	gene	2140999	2141487	.	-	0	gene_id	gene106692	Alias	PA1956	name	PA1956
chr	PseudoCAP	gene	2141790	2142317	.	-	0	gene_id	gene106694	Alias	PA1957	name	PA1957
chr	PseudoCAP	gene	2142314	2142889	.	-	0	gene_id	gene106696	Alias	PA1958	name	PA1958
chr	PseudoCAP	gene	2143173	2144006	.	+	0	gene_id	gene106698	Alias	PA1959	name	bacA
chr	PseudoCAP	gene	2144077	2144799	.	+	0	gene_id	gene106700	Alias	PA1960	name	PA1960
chr	PseudoCAP	gene	2144810	2145745	.	-	0	gene_id	gene106702	Alias	PA1961	name	PA1961
chr	PseudoCAP	gene	2145894	2146502	.	+	0	gene_id	gene106704	Alias	PA1962	name	azoR2
chr	PseudoCAP	gene	2146609	2146875	.	+	0	gene_id	gene106706	Alias	PA1963	name	PA1963
chr	PseudoCAP	gene	2146961	2148526	.	-	0	gene_id	gene106708	Alias	PA1964	name	PA1964
chr	PseudoCAP	gene	2148854	2149189	.	+	0	gene_id	gene106710	Alias	PA1965	name	PA1965
chr	PseudoCAP	gene	2149472	2149843	.	+	0	gene_id	gene106712	Alias	PA1966	name	PA1966
[truncated: 3,686 more rows]

## Sheet: FC_all_genes_LB7_vers_mix
geneID	logFC	logCPM	PValue	FDR
gene107552	-9.97531	11.3649	0	0
gene107600	-9.84502	8.91392	0	0
gene107550	-9.77923	8.89115	0	0
gene107566	-9.66829	8.80078	0	0
gene107574	-9.65689	8.61704	0	0
gene107602	-9.63414	7.84429	0	0
gene107548	-9.57583	8.29976	0	0
gene107626	-9.4102	11.7949	0	0
gene107568	-9.28508	8.47516	0	0
gene107628	-9.11012	7.37594	0	0
gene107630	-9.10536	7.31739	0	0
gene107604	-9.00378	9.67474	0	0
gene107570	-8.93812	8.47086	0	0
gene111778	-8.84839	10.0176	0	0
gene111772	-8.48266	8.6667	0	0
gene111774	-8.48006	9.04772	0	0
gene111776	-8.41055	8.00367	0	0
gene109633	-8.23367	8.82007	0	0
gene111986	-8.09672	8.02345	0	0
gene107576	-8.07826	9.80487	0	0
gene111780	-7.88558	6.07319	0	0
gene107582	-7.81615	11.7833	0	0
gene111116	-7.67129	5.13135	0	0
gene105124	7.4863	12.0413	0	0
gene107840	-7.44785	7.41075	0	0
gene107580	-7.33122	10.8434	0	0
gene104093	-7.25328	7.55614	0	0
gene107578	-7.20758	10.9054	0	0
gene107594	-7.20241	6.17951	0	0
gene107572	-7.20002	9.46416	0	0
gene107564	-7.00974	8.69643	0	0
gene105266	-6.97428	11.9287	0	0
gene111118	-6.95662	4.32181	0	0
gene106848	-6.95109	6.45657	0	0
gene107588	-6.92593	6.32281	0	0
gene107590	-6.86287	5.65884	0	0
gene107592	-6.83715	7.05824	0	0
gene107562	-6.75437	6.74087	0	0
gene107586	-6.66782	6.696	0	0
gene106846	-6.63313	7.89714	0	0
gene107584	-6.52582	7.81777	0	0
gene111082	6.37686	9.37588	0	0
gene109957	-6.37409	6.51098	0	0
gene112280	-6.29983	7.43805	0	0
gene107596	-6.26116	6.00362	0	0
gene107682	-6.21454	6.30312	0	0
gene109959	-6.17688	8.30072	0	0
gene108520	-6.17032	7.43968	0	0
gene111086	6.15023	8.91872	0	0
gene111120	-6.00353	5.75903	0	0
gene109879	-5.99399	6.59534	0	0
gene107710	-5.97583	6.29062	0	0
gene107680	-5.97258	6.87575	0	0
gene111122	-5.97075	5.4511	0	0
gene109635	-5.95328	5.83207	0	0
gene111170	-5.83919	9.82769	0	0
gene107598	-5.81891	7.32771	0	0
gene107560	-5.74053	7.01116	0	0
gene108674	-5.65706	9.51041	0	0
gene105258	-5.56617	10.6646	0	0
gene106522	-5.50851	10.7787	0	0
gene107534	-5.45155	5.95612	0	0
gene111156	-5.43898	5.54398	0	0
gene111126	-5.43673	6.1629	0	0
gene109955	-5.40151	6.42952	0	0
gene110666	-5.37087	9.102	0	0
gene109927	5.34698	7.49837	0	0
gene103787	5.32984	6.73591	0	0
gene107514	-5.29989	6.1387	0	0
gene105260	-5.28989	8.48512	0	0
gene103775	5.25328	10.7701	0	0
gene107558	-5.24292	7.31996	0	0
gene107522	-5.18835	6.45336	0	0
gene112278	-5.18548	5.82802	0	0
gene109931	5.18358	5.77862	0	0
gene109881	5.18013	9.05506	0	0
gene106788	-5.17078	5.93789	0	0
gene103773	5.11863	7.8073	0	0
gene109923	5.1137	6.57525	0	0
gene107380	-5.10705	7.47408	0	0
gene112022	5.00407	10.4529	0	0
gene105370	-4.97851	6.28369	0	0
gene111124	-4.92616	5.33482	0	0
gene106786	-4.83838	7.32096	0	0
gene105454	4.8057	5.41356	0	0
gene111084	4.7408	9.55476	0	0
gene103679	-4.67717	5.14485	0	0
gene112028	-4.64917	7.62121	0	0
gene105126	4.40306	9.48442	0	0
gene111274	-4.3861	7.45808	0	0
gene105064	-4.3637	5.98244	0	0
gene104596	4.29928	5.87744	0	0
gene105128	4.17231	7.81107	0	0
gene110668	-4.14416	6.94874	0	0
gene104624	-4.13211	5.41554	0	0
gene102939	-4.11703	5.72291	0	0
gene104163	-3.85521	5.50086	0	0
gene107510	-3.70831	6.78098	0	0
gene102945	-3.69861	5.83295	0	0
gene103789	3.55297	7.14638	0	0
gene112276	-3.44989	6.65652	0	0
gene107546	-3.32344	6.07961	0	0
gene113902	4.28848	6.08087	4.26625685183916e-320	2.29797836931097e-318
gene106164	4.7494	5.67676	3.80638054869013e-319	2.03055743344906e-317
gene111088	5.13072	6.19592	1.71623968767078e-316	9.06828360854867e-315
gene113900	4.14106	7.28176	1.03729906445867e-315	5.42918415997847e-314
gene105262	-4.17746	7.50891	5.91541567070466e-315	3.06717066740075e-313
gene105264	-3.98576	7.01708	0	5.5998e-307
gene102949	-4.06425	5.15409	1.03379e-307	5.26189e-306
gene104334	-3.76463	7.55549	1.4534e-304	7.33044e-303
gene113896	4.66844	6.61645	2.02502e-303	1.01215e-301
gene107512	-4.88726	7.75639	2.33971e-301	1.15899e-299
gene109925	5.31533	5.9957	1.4204e-295	6.97378e-294
gene103783	7.73422	7.85186	2.68722e-294	1.30778e-292
gene110664	-5.05169	8.82508	1.90352e-293	9.18325e-292
gene107606	-3.36653	5.88398	2.75038e-292	1.31544e-290
gene105036	-5.61509	4.39964	2.10127e-291	9.96395e-290
gene105334	-3.23928	6.57129	4.67603e-291	2.19852e-289
gene103721	5.56903	5.21358	1.13591e-286	5.29584e-285
gene105268	-3.01981	7.15989	1.41214e-286	6.52878e-285
gene106918	-5.00846	6.65339	5.29261e-282	2.42673e-280
gene108556	-3.91343	4.82693	3.33016e-281	1.5144e-279
gene111078	5.1908	6.80118	1.3669e-280	6.1655e-279
gene102997	4.65732	7.01822	2.26713e-278	1.01436e-276
gene113898	4.27618	7.15974	2.22057e-277	9.85576e-276
gene110171	3.47218	8.60725	8.09914e-275	3.56619e-273
gene105368	-3.96829	5.13459	1.20275e-273	5.25421e-272
gene160439	-8.05817	4.78897	1.25613e-271	5.44452e-270
gene109937	4.74282	7.07913	1.32874e-270	5.7146e-269
gene111570	3.12039	11.218	1.49139e-270	6.36481e-269
gene106166	3.93501	4.75694	3.28411e-269	1.39086e-267
gene110266	-5.47002	11.5633	8.89352e-265	3.73797e-263
gene111098	-4.3505	6.99788	1.08454e-262	4.52407e-261
gene111102	-4.12163	9.59766	2.95965e-262	1.22538e-260
gene106634	-3.21358	5.63917	4.97872e-262	2.03922e-260
gene109929	5.43601	5.26532	4.99882e-262	2.03922e-260
gene109605	5.68186	5.2917	6.71262e-261	2.71836e-259
gene112658	-4.63068	4.11485	1.29707e-260	5.2146e-259
gene106182	3.7621	5.33407	2.74039e-260	1.09379e-258
gene110646	3.19096	6.8317	5.88746e-260	2.33312e-258
gene108618	-2.94546	5.8258	2.4611e-259	9.68381e-258
gene109637	-5.18725	3.93424	1.95597e-258	7.64207e-257
gene109283	-4.89097	6.51809	1.43573e-257	5.57024e-256
gene107520	-5.34243	4.22139	9.9386e-257	3.82912e-255
gene111080	5.68347	9.38298	8.57548e-253	3.28116e-251
gene111834	-2.8669	7.67471	3.85933e-252	1.46655e-250
gene103063	3.29236	6.0509	3.86342e-250	1.45811e-248
gene106602	-4.58685	4.32171	1.3817e-249	5.17951e-248
gene112042	-3.54876	5.96085	6.84693e-249	2.54945e-247
gene107456	-4.91548	5.73308	1.81831e-246	6.72532e-245
gene103785	6.59245	8.57448	5.58109e-246	2.05059e-244
gene107712	-4.13081	4.49159	1.1052e-244	4.03398e-243
gene160437	-5.68479	7.41192	4.84718e-244	1.75766e-242
gene107386	-3.30949	6.63988	9.87432e-241	3.55732e-239
gene107500	-3.16152	5.23736	4.35237e-240	1.55787e-238
gene108896	-4.14803	10.3326	4.35315e-239	1.54816e-237
gene107524	-3.29078	6.09076	9.36776e-239	3.31034e-237
gene107714	-3.29507	4.95764	1.57227e-238	5.52085e-237
gene102821	3.04004	6.89776	7.28102e-238	2.54057e-236
gene105332	-5.8311	8.05783	2.31612e-237	8.03114e-236
gene102825	3.2335	5.98444	3.09926e-235	1.06799e-233
gene112656	-5.712	3.80074	5.95155e-234	2.03822e-232
gene107910	-3.23786	5.54145	1.0898e-233	3.70934e-232
gene107388	-3.29494	7.04664	2.1989e-231	7.43873e-230
gene109649	-3.7904	4.85381	3.77671e-228	1.26989e-226
gene134060	2.82604	8.11603	3.93028e-228	1.31357e-226
gene107526	-2.78099	6.54975	1.51472e-224	5.03214e-223
gene109651	-3.4415	4.93498	2.37835e-222	7.85421e-221
gene109983	-2.79383	7.26157	1.24308e-221	4.08085e-220
gene103677	-3.65842	4.32638	1.01582e-218	3.31515e-217
gene108522	-5.43942	3.87744	6.77548e-218	2.19827e-216
gene103289	-3.3712	4.70241	2.86708e-217	9.248e-216
gene113172	-2.54571	6.79346	6.6584e-215	2.13531e-213
gene106292	-2.43981	5.73456	5.06315e-214	1.61439e-212
gene104211	4.55843	5.28114	2.65379e-212	8.41329e-211
gene102943	-3.07222	6.91698	5.08182e-212	1.60193e-210
gene102827	2.88084	6.22508	8.94502e-212	2.80378e-210
gene106004	-2.91075	8.26683	2.1227e-211	6.61616e-210
gene106338	-3.41696	5.32155	2.64282e-211	8.19127e-210
gene104005	3.21005	6.84545	1.60916e-210	4.95978e-209
gene106916	-4.47841	4.5186	7.50543e-209	2.30056e-207
gene105362	3.64027	5.20132	8.95061e-209	2.72846e-207
gene105272	-2.52561	5.60282	1.78065e-208	5.39838e-207
gene107518	-5.27594	5.87557	1.80811e-208	5.45183e-207
gene108114	5.37852	7.91404	5.22445e-208	1.56677e-206
gene109777	-3.97563	8.92782	1.63741e-207	4.88405e-206
gene107390	-2.63344	8.70286	4.75849e-207	1.41177e-205
gene109539	-3.08029	5.64547	2.01046e-205	5.93299e-204
gene107382	-2.79835	5.6429	1.80103e-202	5.28683e-201
gene113308	-3.22764	9.05503	2.95893e-202	8.64007e-201
gene111114	-2.98848	7.67898	3.39412e-198	9.85895e-197
gene107462	-5.11185	4.79343	5.30742e-198	1.53362e-196
gene111988	3.5379	9.49479	6.26122e-198	1.79986e-196
gene112068	2.67301	5.9952	7.57172e-198	2.16536e-196
gene113478	2.66383	7.95715	1.18382e-197	3.36812e-196
gene104602	3.5301	4.65048	1.05159e-195	2.97664e-194
gene108958	-2.60872	7.00618	3.18728e-195	8.97617e-194
gene107464	-5.35943	4.42767	6.38199e-195	1.78825e-193
gene104009	3.0669	5.36326	1.7064e-194	4.75734e-193
gene103681	-4.32118	4.27327	1.96012e-194	5.43739e-193
gene104007	3.14108	5.70185	7.15254e-194	1.97424e-192
gene109603	7.08344	7.94197	2.28443e-193	6.27426e-192
gene107470	-2.59973	6.03146	4.83672e-192	1.32188e-190
gene112986	-2.70512	6.23873	5.27974e-192	1.43588e-190
gene105100	-2.56854	5.48905	6.85249e-192	1.85452e-190
gene103975	3.13333	5.90092	6.57203e-191	1.76998e-189
gene112044	-3.29671	6.92864	2.41112e-188	6.46227e-187
gene107502	-2.50634	5.85809	2.89091e-188	7.71096e-187
gene106244	-2.39829	6.4766	3.53329e-188	9.37928e-187
gene110644	2.76309	6.42972	7.86572e-188	2.07805e-186
gene112026	-2.77538	5.47932	1.43914e-187	3.78405e-186
gene107906	-2.7643	5.17683	1.94648e-187	5.09391e-186
gene108220	-2.85282	4.9501	6.2134e-187	1.6184e-185
gene107740	2.5691	6.97434	6.4986e-187	1.68478e-185
gene112644	3.8796	5.15939	2.50188e-186	6.456e-185
gene109775	-3.56747	8.0521	5.50858e-186	1.41489e-184
gene102985	2.52261	7.32116	2.17903e-185	5.5711e-184
gene102823	2.887	6.67713	8.94346e-183	2.27607e-181
gene103057	3.12651	5.47962	9.22864e-183	2.33792e-181
gene112490	2.63082	9.17581	4.44383e-181	1.12065e-179
gene103983	3.14015	7.94808	2.16997e-180	5.4475e-179
gene105028	-3.72754	6.33332	1.04707e-179	2.61674e-178
gene108158	-3.01926	5.21247	8.83425e-179	2.19787e-177
gene103771	3.90574	5.21186	4.55208e-178	1.12745e-176
gene109653	-2.99731	4.71398	4.35755e-176	1.07447e-174
gene109629	-5.21412	2.95682	7.18956e-176	1.76494e-174
gene104344	-2.46614	5.19656	9.02705e-176	2.20626e-174
gene106750	-2.89484	5.99816	1.26916e-175	3.08828e-174
gene107516	-5.34937	3.51527	3.48407e-175	8.44088e-174
gene107100	-3.26168	4.20943	1.40651e-174	3.39276e-173
gene112488	2.73738	6.77533	1.77246e-174	4.25698e-173
gene110173	3.18673	6.76425	8.44925e-174	2.02054e-172
gene103977	3.0244	5.45689	1.73865e-173	4.13992e-172
gene103779	3.3077	4.21429	3.82012e-172	9.05727e-171
gene102959	-4.01721	3.89403	7.99648e-172	1.88785e-170
gene106202	2.58922	5.5414	6.43395e-170	1.51252e-168
gene103911	-2.5178	8.2142	1.90734e-168	4.46494e-167
gene111578	-3.45196	10.4097	6.31157e-168	1.46873e-166
gene107506	-2.43149	6.46662	6.32708e-168	1.46873e-166
gene110540	-2.13035	6.8086	6.79453e-168	1.57067e-166
gene107384	-3.61462	9.53401	7.13258e-168	1.64197e-166
gene107786	-2.40129	6.56907	8.03561e-168	1.84221e-166
gene112642	3.39131	4.65517	2.43395e-166	5.55703e-165
gene111842	-2.8027	7.7317	2.60364e-166	5.9093e-165
gene103985	3.02508	6.53773	2.60955e-166	5.9093e-165
gene109601	9.0942	7.90122	5.11186e-166	1.15287e-164
gene104237	-2.13157	6.06433	1.14583e-165	2.57371e-164
gene111552	-2.58544	5.34619	2.73802e-165	6.1252e-164
gene110175	2.42865	6.72899	3.04569e-165	6.78615e-164
gene106834	-4.34369	4.35089	7.27466e-165	1.61439e-163
gene104848	-3.04199	8.82447	2.17375e-164	4.80477e-163
gene103753	-2.3095	6.94922	3.19811e-164	7.04091e-163
gene109631	-5.05323	3.22663	7.25918e-164	1.59185e-162
gene103291	3.01897	6.2087	1.45139e-163	3.17021e-162
gene112090	2.20642	6.79295	9.34228e-163	2.03259e-161
gene102955	-4.41537	3.27307	2.3831e-162	5.16462e-161
gene103971	2.77031	5.25166	2.88379e-162	6.2254e-161
gene104346	-3.26948	4.50041	3.60747e-161	7.75745e-160
gene108112	3.49274	4.52162	4.38185e-161	9.38629e-160
gene111100	-4.009	4.56776	4.03335e-160	8.60655e-159
gene103259	2.29445	5.42222	5.13042e-159	1.09056e-157
gene108956	-2.87465	7.84327	2.79955e-158	5.92821e-157
gene113946	-2.29344	6.57027	6.4449e-158	1.35955e-156
gene112486	2.62938	5.66794	8.7952e-158	1.84832e-156
gene109741	-2.31476	5.73476	1.47221e-156	3.08219e-155
gene112448	-2.1607	6.61507	7.89683e-155	1.64705e-153
gene110642	2.33309	5.73393	1.01643e-154	2.11205e-153
gene110199	2.8412	9.12121	1.74772e-154	3.61804e-153
gene111838	-2.74344	9.34231	2.22786e-153	4.59485e-152
gene112410	4.75771	5.60055	3.00669e-153	6.1782e-152
gene103951	2.06169	5.98984	3.96719e-153	8.12176e-152
gene105038	-2.26565	5.95004	1.18018e-152	2.40722e-151
gene112336	-2.85816	8.64189	1.61161e-152	3.27517e-151
gene112201	-2.39834	7.59927	2.02265e-152	4.0955e-151
gene103429	-3.22318	6.04855	1.70184e-151	3.43339e-150
gene102947	-3.62866	3.66528	3.39396e-151	6.82236e-150
gene111230	-2.77143	5.3367	4.72729e-151	9.46824e-150
gene103765	2.72027	5.44354	5.32017e-151	1.06174e-149
gene112062	-2.80793	9.18788	1.63375e-150	3.24876e-149
gene109607	5.61543	3.24758	1.40105e-149	2.77607e-148
gene113592	-2.22169	6.35313	1.11492e-147	2.20126e-146
gene105148	-2.79038	4.60064	1.34718e-147	2.6504e-146
gene103973	3.35132	4.67859	1.48885e-147	2.91877e-146
gene107544	-2.25567	8.19527	2.13024e-146	4.16146e-145
gene107608	-3.26486	3.99394	4.96259e-146	9.66051e-145
gene105030	-2.3722	5.27352	9.41946e-146	1.82724e-144
gene107734	-2.1926	5.28962	9.59066e-146	1.85397e-144
gene111104	-2.80137	5.50783	1.71453e-145	3.30286e-144
gene112626	3.00426	7.0543	3.70325e-145	7.10922e-144
gene106760	-2.99499	4.42752	5.52061e-145	1.05615e-143
gene109867	2.23087	7.79203	9.93543e-145	1.89422e-143
gene109721	-2.87225	4.33136	1.03929e-143	1.97465e-142
gene106832	2.48195	5.46511	1.18526e-143	2.24431e-142
gene103979	2.32528	7.34794	4.10081e-143	7.73854e-142
gene102793	-2.29654	7.69752	4.85544e-143	9.13152e-142
gene107528	-3.65633	3.85792	9.35301e-143	1.75306e-141
gene102937	-2.07636	7.95319	3.42624e-142	6.40026e-141
gene104021	2.62248	7.23742	1.54332e-141	2.87327e-140
gene107742	2.079	6.21974	2.68494e-141	4.98196e-140
gene110502	2.29479	7.34758	3.36616e-141	6.22515e-140
gene103469	-2.05327	6.41043	5.06918e-141	9.34346e-140
gene108184	-3.03417	4.33082	9.18806e-141	1.68792e-139
gene111992	-2.41768	5.1544	1.46485e-139	2.68217e-138
gene102791	-2.16055	8.4814	3.12429e-139	5.70183e-138
gene107466	-5.32891	3.16385	1.01972e-138	1.85488e-137
gene106648	-2.01905	5.31945	3.17538e-138	5.7572e-137
gene108316	-2.43334	5.43843	1.62949e-137	2.94475e-136
gene104017	2.58864	5.18459	4.59549e-136	8.27785e-135
gene112412	4.67904	5.94945	5.22239e-136	9.37665e-135
gene113096	2.16726	7.5024	1.18188e-135	2.11518e-134
gene112205	-1.99291	6.60335	1.38913e-135	2.4781e-134
gene102953	-3.06778	3.83433	1.87808e-135	3.33962e-134
gene112704	2.69716	9.21123	1.76548e-134	3.12935e-133
gene112338	-2.79122	8.91847	3.60774e-134	6.37444e-133
gene106184	3.24247	4.22385	6.19819e-134	1.09167e-132
gene112692	-2.09979	5.9027	6.76139e-134	1.18709e-132
gene112532	-2.15991	6.7974	2.4936e-133	4.36419e-132
gene108282	-2.75271	7.45618	6.10061e-133	1.06435e-131
gene107104	-3.52281	3.30942	1.64421e-132	2.85958e-131
gene103761	2.49309	5.2913	2.86451e-132	4.96634e-131
gene104011	2.75118	6.83052	3.6484e-132	6.30571e-131
gene103535	-3.22764	8.18669	7.52935e-132	1.29729e-130
gene108310	-2.24837	5.05177	2.03078e-131	3.48817e-130
gene109257	-2.3982	6.46375	4.14118e-131	7.09113e-130
gene106160	4.41817	4.20942	1.08521e-130	1.85255e-129
gene103769	3.20442	7.49769	2.20238e-130	3.7481e-129
gene109609	5.91265	2.85406	2.27257e-130	3.85573e-129
gene102977	-2.68063	8.28877	3.86097e-129	6.53069e-128
gene110504	2.8232	4.61088	7.1547e-129	1.20651e-127
gene106158	3.80367	4.01652	8.46083e-129	1.42244e-127
gene104620	-2.69618	4.50606	1.29137e-128	2.16451e-127
gene103755	2.9534	6.98696	1.5607e-128	2.60805e-127
gene110618	-3.17186	3.37828	5.33075e-128	8.88138e-127
gene106194	2.60101	4.78798	9.09211e-128	1.51027e-126
gene103723	4.40711	3.42065	1.42334e-127	2.35722e-126
gene104414	-2.24794	6.71499	2.60424e-127	4.3001e-126
gene106198	1.82711	7.08202	7.00667e-127	1.1535e-125
gene106162	4.36797	3.14807	9.42303e-127	1.54671e-125
gene107308	2.42174	5.17066	1.2784e-126	2.0922e-125
gene113480	1.99485	8.09804	1.29577e-126	2.11439e-125
gene103987	2.60773	5.76108	1.29987e-126	2.11486e-125
gene103827	2.15066	7.43285	2.66002e-125	4.31514e-124
gene107674	-2.91749	4.6783	1.83475e-124	2.96769e-123
gene106912	-3.62335	3.28934	3.15865e-124	5.09424e-123
gene104454	-2.77456	4.05681	3.41406e-124	5.49021e-123
gene102795	-2.64234	5.9687	1.6557e-123	2.65487e-122
gene107902	-1.88402	7.01254	2.29253e-123	3.66541e-122
gene108474	2.13976	6.06831	2.89846e-122	4.62087e-121
gene112217	2.92635	6.01175	3.07236e-122	4.88408e-121
gene106186	2.39321	6.33855	3.42238e-122	5.42497e-121
gene107392	-2.11531	6.54441	1.42727e-121	2.25598e-120
gene107226	-1.895	6.08268	6.11682e-121	9.64094e-120
gene103537	-2.73764	8.15314	9.3956e-121	1.47668e-119
gene108144	-2.28204	6.42962	1.06097e-120	1.66279e-119
gene106190	2.64541	6.21306	2.15437e-120	3.36688e-119
gene109935	5.08316	3.39831	3.44393e-120	5.36711e-119
gene103965	2.71975	4.63341	5.80418e-120	9.02006e-119
gene106600	-3.43529	3.07262	5.86247e-120	9.08519e-119
gene107460	-4.51563	3.4908	1.3282e-119	2.05261e-118
gene109981	-1.89792	5.56936	1.67652e-119	2.5837e-118
gene103317	-1.79696	5.93916	5.17653e-119	7.95551e-118
gene105902	4.0317	4.11329	5.72494e-119	8.77403e-118
gene105032	2.51703	4.91527	2.46533e-118	3.76794e-117
gene104386	-2.69675	3.63416	4.26211e-118	6.49621e-117
gene109627	-4.16544	2.59926	4.63293e-118	7.04206e-117
gene103881	-3.38309	10.3089	9.93988e-118	1.50673e-116
gene110620	-3.34785	3.25981	1.84212e-117	2.78477e-116
gene108110	3.14035	6.54789	2.82944e-117	4.26569e-116
gene107926	-1.89165	6.70915	3.60066e-117	5.41367e-116
gene102837	-2.47936	4.40763	9.69122e-117	1.45316e-115
gene111292	2.34971	10.8554	1.0336e-116	1.54567e-115
gene109933	5.24696	3.14059	4.51542e-116	6.72823e-115
gene105372	-2.30077	4.97537	4.52348e-116	6.72823e-115
gene112268	-2.16309	6.40166	5.37247e-116	7.96964e-115
gene103725	3.19549	5.38881	1.08291e-115	1.60213e-114
gene109773	-2.08983	9.32509	1.64068e-115	2.42087e-114
gene112690	-3.14065	3.22418	1.88333e-115	2.77155e-114
gene102993	2.5305	7.61413	1.97093e-115	2.89278e-114
gene111096	2.85227	5.64915	7.6066e-115	1.11349e-113
gene105474	-2.82172	4.49375	1.45284e-114	2.12114e-113
gene111234	-1.97417	6.26747	1.16538e-113	1.69699e-112
gene112354	2.55038	5.83094	1.64309e-113	2.38636e-112
gene108330	-2.07212	5.27792	6.30166e-113	9.12836e-112
gene111232	-2.49701	5.45517	9.46685e-113	1.36776e-111
gene106070	-1.97535	6.1047	3.54122e-112	5.10304e-111
gene107960	-1.88212	5.97696	5.03209e-112	7.23265e-111
gene112688	-3.13403	3.31463	5.5636e-112	7.97593e-111
gene106914	-3.62454	3.39916	9.66051e-112	1.38135e-110
gene112686	-3.18555	3.4315	1.09425e-111	1.56064e-110
gene112716	-2.43047	4.77252	1.23185e-111	1.75238e-110
gene104458	-2.98382	9.40444	1.28366e-111	1.82142e-110
gene110264	-2.2102	7.27685	4.20656e-110	5.95357e-109
gene104580	2.67043	4.70492	4.77929e-110	6.74694e-109
gene105818	-2.36795	4.117	8.71386e-110	1.22702e-108
gene102909	2.11064	6.73979	1.23416e-109	1.73345e-108
gene103763	2.70902	4.66497	1.4956e-109	2.09536e-108
gene106606	1.82112	6.24512	2.59273e-109	3.62329e-108
gene102907	2.1685	5.23363	4.38141e-109	6.10755e-108
gene111238	-3.84787	7.69156	4.65423e-109	6.4716e-108
gene109000	-1.79412	5.76658	4.77851e-109	6.62779e-108
gene104037	1.89108	6.93216	5.74644e-109	7.95043e-108
gene104239	-2.24614	7.38691	1.01485e-108	1.40059e-107
gene107730	-1.93525	5.35191	1.07568e-108	1.48086e-107
gene111106	-2.21875	4.25632	1.35141e-108	1.85585e-107
gene134062	1.80339	7.01321	4.14788e-108	5.68208e-107
gene110976	-2.19538	4.90539	4.20859e-108	5.75104e-107
gene107106	-3.68612	2.94133	5.10732e-108	6.96202e-107
gene107458	-4.65116	3.72932	8.05156e-108	1.09485e-106
gene105900	3.53561	4.73701	8.5356e-108	1.15784e-106
gene108624	-2.89785	3.30376	8.60239e-108	1.16405e-106
gene112552	2.1823	8.99455	9.10176e-108	1.22863e-106
gene106752	-2.56044	4.90522	1.16656e-107	1.57089e-106
gene103727	2.81568	5.38529	2.4192e-107	3.24982e-106
gene106922	-1.83218	7.56039	7.53964e-107	1.01038e-105
gene110063	-1.87877	11.043	7.87624e-107	1.05295e-105
gene107224	-2.02772	5.47408	1.22056e-106	1.6278e-105
gene103867	-2.18266	4.96503	1.37848e-106	1.834e-105
gene108574	-1.98133	5.91607	2.03506e-106	2.70108e-105
gene113848	-2.50928	5.94119	5.12409e-106	6.78483e-105
gene103913	-2.24183	8.60801	9.67852e-106	1.27849e-104
gene103777	1.86806	6.84553	9.90973e-106	1.30592e-104
gene106066	-1.96054	4.87568	2.39044e-105	3.14269e-104
gene102995	3.04508	4.35799	3.02363e-105	3.96575e-104
gene103967	2.89304	3.98358	4.13632e-105	5.41234e-104
gene107994	-2.27313	10.7835	1.77536e-104	2.31757e-103
gene103759	2.44064	6.44931	4.40027e-104	5.73068e-103
gene106924	-2.19845	5.50304	7.48531e-104	9.72564e-103
gene105300	-3.48786	2.88963	9.33632e-104	1.21023e-102
gene103995	2.66428	5.47405	1.08364e-103	1.40141e-102
gene107162	2.28846	4.30938	1.28255e-103	1.65479e-102
gene105304	-2.90131	3.35382	1.8069e-103	2.32591e-102
gene107110	-2.52337	3.94834	1.92084e-103	2.46685e-102
gene107264	-1.87272	5.74249	6.48078e-103	8.30378e-102
gene103767	2.70653	5.28253	4.45995e-102	5.70133e-101
gene106540	-1.82489	6.17541	6.07922e-102	7.75346e-101
gene108996	-1.80516	6.16715	9.22515e-102	1.17388e-100
gene111694	1.80292	6.46626	1.1458e-101	1.45466e-100
gene110580	2.05035	5.66711	1.51056e-101	1.91338e-100
gene106200	2.48588	4.28919	1.68577e-101	2.13044e-100
gene111254	-4.67789	9.02751	3.73016e-101	4.70339e-100
gene112428	2.49595	4.3335	7.49703e-101	9.43164e-100
gene106598	-3.35367	2.70607	9.38497e-101	1.178e-99
gene113306	-1.66308	6.52537	9.70711e-101	1.21569e-99
gene107638	-2.10169	4.27464	1.05926e-100	1.3236e-99
gene110608	2.3668	4.148	1.41349e-100	1.76225e-99
gene109889	-1.85645	6.43014	1.76686e-100	2.19788e-99
gene110396	2.0488	6.58046	2.563e-100	3.18111e-99
gene104702	-1.66197	7.31734	2.72838e-100	3.37881e-99
gene104015	2.3214	5.25857	5.16821e-100	6.38602e-99
gene108702	1.91092	9.02937	7.6565e-100	9.43962e-99
gene106782	-2.97896	8.21625	2.07001e-99	2.54644e-98
gene103989	2.55221	7.50414	9.14201e-99	1.12212e-97
gene113300	-1.64165	7.00751	1.34538e-98	1.64771e-97
gene107298	-1.68521	6.21394	1.5211e-98	1.85882e-97
gene105416	-1.78805	6.79442	1.53597e-98	1.87288e-97
gene110506	2.94348	3.59263	1.58726e-98	1.93116e-97
gene112708	1.83172	6.06018	1.67115e-98	2.02878e-97
gene107112	-3.21502	5.03062	3.53879e-98	4.28672e-97
gene109006	-1.95934	7.33653	4.88592e-98	5.90569e-97
gene106196	1.82627	6.85935	6.89844e-98	8.32012e-97
gene107644	-2.52637	5.14273	7.67655e-98	9.2385e-97
gene102957	-3.50081	3.29646	3.0015e-97	3.6044e-96
gene105782	-2.26265	4.72822	3.01184e-97	3.609e-96
gene102903	1.95968	9.66874	5.96871e-97	7.13672e-96
gene113726	-1.73092	5.61119	8.06133e-96	9.61812e-95
gene107728	-1.95276	4.97327	2.15319e-95	2.5635e-94
gene113118	2.30219	4.91519	1.17272e-94	1.3932e-93
gene106518	-2.25165	6.58768	1.20966e-94	1.43401e-93
gene103137	2.18004	5.52272	2.16641e-94	2.56274e-93
gene108688	-1.59391	7.78416	2.74985e-94	3.246e-93
gene107530	-2.68658	3.51216	4.93169e-94	5.80913e-93
gene108994	-2.0991	4.61827	5.03112e-94	5.9137e-93
gene111554	-1.72217	8.23322	5.09366e-94	5.97455e-93
gene105972	2.43878	4.19596	1.02719e-93	1.20228e-92
gene109469	-2.72119	10.2106	1.25414e-93	1.46483e-92
gene108418	-1.96581	8.56762	1.57586e-93	1.83674e-92
gene106780	-3.28045	7.76869	1.6728e-93	1.94564e-92
gene106778	-2.72094	8.22244	2.1697e-93	2.51831e-92
gene103107	-2.77141	3.86332	2.34031e-93	2.71066e-92
gene110792	-2.28981	4.61186	4.76501e-93	5.50756e-92
gene104059	-1.75814	7.72638	5.97238e-93	6.88872e-92
gene107114	-2.85148	3.39124	6.8247e-93	7.85548e-92
gene113904	1.99731	6.80896	1.11871e-92	1.28501e-91
gene106176	1.86622	5.02668	1.22503e-92	1.40423e-91
gene106036	3.53712	3.84031	1.78503e-92	2.04193e-91
gene108476	-1.84117	5.56574	2.44717e-92	2.7936e-91
gene109639	-3.20702	2.52936	3.98294e-92	4.53744e-91
gene103991	1.97413	5.37737	4.81531e-92	5.47446e-91
gene111452	1.62037	8.17458	8.39735e-92	9.5273e-91
gene103019	-1.6838	7.1773	1.31256e-91	1.48614e-90
gene104904	1.89368	8.60283	2.24349e-91	2.535e-90
gene109485	-2.91581	6.37402	2.54135e-91	2.86573e-90
gene107908	-2.56901	3.59398	3.37353e-91	3.79642e-90
gene109004	-1.85987	6.05252	3.52798e-91	3.96219e-90
gene105302	-3.72104	3.47037	3.54439e-91	3.97258e-90
gene112346	1.70827	6.46765	8.1033e-91	9.06393e-90
gene108572	-1.7	5.49349	1.20505e-90	1.34519e-89
gene106168	3.50533	2.45049	3.13309e-90	3.49043e-89
gene104019	2.59265	5.14444	3.9925e-90	4.43895e-89
gene103915	-2.04294	10.8714	5.433e-90	6.02846e-89
gene106226	-1.83101	7.11536	7.60373e-90	8.42026e-89
gene106402	1.76008	6.61938	8.604e-90	9.50897e-89
gene104920	1.58251	6.32873	1.34329e-89	1.48162e-88
gene103757	2.37393	6.34839	1.87564e-89	2.06469e-88
gene102941	-2.52813	3.602	2.00347e-89	2.20104e-88
gene112106	2.13811	4.81584	2.95547e-89	3.2405e-88
gene104586	3.24415	8.77115	6.33323e-89	6.93032e-88
gene103255	1.52658	6.60157	8.08092e-89	8.82538e-88
gene112012	2.11391	4.83743	1.38595e-88	1.51066e-87
gene106682	-1.86334	4.71423	6.32306e-88	6.8785e-87
gene107188	2.4681	6.71291	7.71413e-88	8.37535e-87
gene107108	-3.01959	3.23537	9.64483e-88	1.04511e-86
gene111504	1.96269	9.1325	5.17343e-87	5.59497e-86
gene106188	2.19933	6.12581	6.02995e-87	6.50859e-86
gene105950	-1.66968	7.76072	1.88843e-86	2.03438e-85
gene109277	-2.11283	4.66524	2.46787e-86	2.65344e-85
gene107892	-2.12394	6.78529	4.58876e-86	4.92426e-85
gene112046	-2.47763	5.29984	4.87807e-86	5.22462e-85
gene112420	-1.60485	7.01015	6.97266e-86	7.45363e-85
gene109489	-3.58852	7.21913	9.39074e-86	1.00192e-84
gene111840	-3.25803	7.04907	1.02001e-85	1.08618e-84
gene112510	8.29746	8.83675	1.09967e-85	1.16877e-84
gene111678	1.91585	8.26446	1.81872e-85	1.92931e-84
gene113846	-2.35084	6.75236	1.8552e-85	1.96425e-84
gene112682	-2.25065	3.51439	2.0744e-85	2.19215e-84
gene102915	1.69456	6.93077	4.86022e-85	5.12633e-84
gene106556	-2.12122	4.94821	5.13403e-85	5.40486e-84
gene112514	8.59464	8.30254	9.76083e-85	1.02563e-83
gene103969	1.7643	5.75088	3.53693e-84	3.70943e-83
gene112660	-2.37512	3.74344	3.72682e-84	3.9012e-83
gene104550	1.62971	8.31148	5.5012e-84	5.74776e-83
gene106266	-1.47602	6.60482	6.39698e-84	6.67114e-83
gene104770	-1.51384	7.29819	8.16874e-84	8.50285e-83
gene104336	-1.81686	5.875	1.36908e-83	1.42241e-82
gene104342	-2.38194	7.43745	1.82043e-83	1.88781e-82
gene106192	2.23879	4.3932	3.05253e-83	3.1596e-82
gene105420	1.9383	6.48758	3.15614e-83	3.26075e-82
gene103947	1.91888	8.09737	3.80239e-83	3.92113e-82
gene111748	1.57383	7.42556	5.85006e-83	6.02155e-82
gene106294	-1.86168	4.72026	6.68862e-83	6.87194e-82
gene111864	-1.67256	5.33559	9.8524e-83	1.01037e-81
gene111832	-2.23026	6.73181	1.40198e-82	1.43509e-81
gene108832	2.02935	6.08733	1.77528e-82	1.81386e-81
gene108620	-2.5658	3.32825	3.33235e-82	3.39851e-81
gene109943	1.59795	6.21027	3.63006e-82	3.69533e-81
gene108318	1.49748	7.16801	5.94522e-82	6.04104e-81
gene109074	2.23841	5.77537	8.60661e-82	8.72933e-81
gene113098	1.56302	7.97741	1.06533e-81	1.07855e-80
gene103949	2.24399	6.74813	1.5372e-81	1.55344e-80
gene112684	-2.16013	3.75199	2.27314e-81	2.29298e-80
gene112984	-1.61271	5.62841	5.00974e-81	5.04429e-80
gene103061	1.80709	5.0606	1.50732e-80	1.51496e-79
gene104241	-1.6752	7.42848	1.59483e-80	1.60002e-79
gene107072	-4.36245	2.3271	2.6983e-80	2.7022e-79
gene103981	1.95636	4.77664	3.59761e-80	3.59631e-79
gene109255	-1.94545	6.47304	4.13719e-80	4.12827e-79
gene103269	2.25877	10.4895	4.49379e-80	4.47604e-79
gene106236	-1.77749	5.36252	9.63532e-80	9.58006e-79
gene111850	-1.54101	6.27264	1.92954e-79	1.91504e-78
gene111868	-2.05076	4.58419	1.99766e-79	1.97911e-78
gene104314	1.95712	9.76183	2.93767e-79	2.9052e-78
gene112518	5.72528	7.61241	3.07735e-79	3.03793e-78
gene111722	2.05929	7.98868	3.19773e-79	3.15115e-78
gene102969	-1.69378	5.05931	3.46381e-79	3.40731e-78
gene107504	-1.90899	4.18025	3.47588e-79	3.41313e-78
gene103729	2.26065	5.37929	3.58846e-79	3.51745e-78
gene103203	-2.3526	3.26391	4.67528e-79	4.57468e-78
gene108188	-2.2005	3.78367	6.63202e-79	6.4779e-78
gene112512	9.09617	5.40033	6.79779e-79	6.62815e-78
gene110398	2.11565	8.92304	6.89271e-79	6.70891e-78
gene103257	2.04629	4.5305	8.90918e-79	8.65642e-78
gene110236	-2.24409	3.9792	9.64126e-79	9.35135e-78
gene107702	1.68479	10.0887	1.29523e-78	1.25409e-77
gene106204	2.20806	4.14081	1.44461e-78	1.39629e-77
gene109012	-1.47393	6.94522	1.97352e-78	1.90419e-77
gene110840	1.64725	6.88699	2.87227e-78	2.76655e-77
gene106528	-1.96489	5.40823	2.88202e-78	2.77113e-77
gene104978	-1.41088	6.4131	3.82285e-78	3.6694e-77
gene107048	-2.99879	3.12176	3.91467e-78	3.75105e-77
gene112912	1.36208	6.56781	4.26918e-78	4.08369e-77
gene106532	-1.83571	4.85532	4.50197e-78	4.29896e-77
gene106180	4.06039	2.7487	5.77164e-78	5.5019e-77
gene103781	3.75007	2.03815	8.49646e-78	8.08548e-77
gene108228	-2.03785	4.11989	9.70742e-78	9.22205e-77
gene104928	1.36776	6.58335	1.1385e-77	1.07972e-76
gene106758	-2.30172	4.90628	1.58124e-77	1.49705e-76
gene111136	-3.42755	2.23733	1.71593e-77	1.6218e-76
gene113758	2.03714	5.39277	2.07398e-77	1.95688e-76
gene103109	-2.30095	3.51764	2.51379e-77	2.36783e-76
gene103963	2.81476	3.55411	5.93555e-77	5.58143e-76
gene103083	-1.70186	4.92475	8.68325e-77	8.15138e-76
gene107034	1.56731	7.19825	1.0211e-76	9.56934e-76
gene105578	1.55857	5.66204	1.13255e-76	1.05959e-75
gene109483	-3.13369	7.75326	1.2742e-76	1.19011e-75
gene107624	-1.91307	6.19267	1.67556e-76	1.56235e-75
gene109719	2.10441	5.26943	2.01823e-76	1.87871e-75
gene112988	-2.41156	3.89068	2.64191e-76	2.45516e-75
gene112816	1.62364	8.04331	2.89517e-76	2.68602e-75
gene111418	-3.22441	6.431	5.82995e-76	5.39976e-75
gene109281	-4.50211	7.90636	6.92455e-76	6.4029e-75
gene107310	2.23079	5.47976	9.7567e-76	9.00669e-75
gene104992	-1.98608	6.67718	1.01374e-75	9.34257e-75
gene108670	-2.46031	4.80084	1.20788e-75	1.11133e-74
gene104700	-1.69063	8.2541	1.33717e-75	1.22825e-74
gene108214	-1.80108	4.96028	1.51264e-75	1.38713e-74
gene103705	-1.55445	6.21859	1.63633e-75	1.49808e-74
gene113070	-4.51155	6.50785	1.79042e-75	1.63645e-74
gene103945	2.30366	7.22005	2.01646e-75	1.84002e-74
gene112118	6.56363	5.74297	2.32926e-75	2.12196e-74
gene112414	2.51126	4.92951	2.40356e-75	2.18606e-74
gene107704	1.82638	5.03921	3.31541e-75	3.01046e-74
gene111750	1.52163	8.26019	3.37022e-75	3.05523e-74
gene112516	9.80776	11.4628	4.93901e-75	4.47009e-74
gene110272	1.57156	6.11201	5.47971e-75	4.95138e-74
gene111252	-4.38768	2.11188	5.73986e-75	5.17801e-74
gene106642	-2.34268	3.10588	7.74992e-75	6.97996e-74
gene107086	-2.15315	3.56169	9.78972e-75	8.80282e-74
gene107312	1.96899	4.84013	1.01162e-74	9.08169e-74
gene107178	-1.37349	7.16433	1.0711e-74	9.60013e-74
gene108692	-2.34954	4.69187	2.36876e-74	2.11966e-73
gene107924	-1.49117	6.47185	3.53433e-74	3.15757e-73
gene111378	2.13818	6.42626	8.71556e-74	7.77395e-73
gene109549	2.09192	7.57287	8.77004e-74	7.80998e-73
gene106608	-2.42093	2.75483	1.08609e-73	9.65643e-73
gene111708	-1.73285	6.61537	2.0267e-73	1.79906e-72
gene104506	1.3679	6.02804	2.54242e-73	2.25325e-72
gene109179	2.85161	7.55253	2.80894e-73	2.48549e-72
gene104546	1.54612	8.37106	3.97382e-73	3.51063e-72
gene102905	1.42294	6.59016	4.14522e-73	3.65623e-72
gene113756	2.19611	9.61965	4.27796e-73	3.76732e-72
gene107128	-2.34433	3.14477	5.29566e-73	4.65615e-72
gene108632	-2.14081	3.88869	1.09472e-72	9.60996e-72
gene110262	1.68219	6.85338	2.18013e-72	1.9108e-71
gene111680	2.3526	7.79428	2.4152e-72	2.11349e-71
gene109509	-1.3592	6.77339	2.58024e-72	2.25436e-71
gene110238	-1.55461	5.72286	3.65699e-72	3.19009e-71
gene113482	1.51506	9.48842	6.23578e-72	5.4311e-71
gene113362	1.86342	6.03114	6.44445e-72	5.60404e-71
gene112436	-1.4936	5.87027	8.69936e-72	7.55306e-71
gene108622	-2.75089	3.76939	1.19892e-71	1.03931e-70
gene109791	2.03705	4.14007	1.28796e-71	1.11476e-70
gene109683	3.0663	4.26803	1.34238e-71	1.16005e-70
gene105464	-1.72745	4.3598	1.53572e-71	1.32506e-70
gene104582	2.59764	3.8567	1.70875e-71	1.47208e-70
gene109439	-1.86553	5.08498	2.0122e-71	1.73081e-70
gene108420	-1.82372	4.58102	2.06798e-71	1.77603e-70
gene103851	-2.39048	3.01511	2.42851e-71	2.08244e-70
gene109487	-2.84179	7.07176	2.82281e-71	2.41681e-70
gene106596	-3.43361	2.02509	3.19632e-71	2.73239e-70
gene107328	-2.72897	3.6054	4.41069e-71	3.76469e-70
gene110075	-1.58951	7.26573	7.69189e-71	6.55524e-70
gene108546	-1.33492	6.79734	1.13845e-70	9.68726e-70
gene111236	-2.04546	4.77292	1.3233e-70	1.1243e-69
gene106784	-2.17782	5.27666	1.90809e-70	1.61866e-69
gene104003	3.19465	3.04113	2.16508e-70	1.83387e-69
gene104622	-1.95445	4.37927	4.02595e-70	3.40488e-69
gene109611	4.62736	2.72601	6.47825e-70	5.47052e-69
gene107856	1.52323	5.92394	6.62492e-70	5.58588e-69
gene109481	-2.99018	7.40134	7.36338e-70	6.19909e-69
gene106754	-2.06309	4.43186	8.69383e-70	7.30809e-69
gene108686	-1.43349	7.41807	1.00006e-69	8.39384e-69
gene113474	1.72811	8.84757	1.0314e-69	8.64378e-69
gene104025	1.55926	5.56346	1.25028e-69	1.04624e-68
gene107610	-2.41108	3.34953	1.92203e-69	1.60594e-68
gene104243	-1.69959	6.89821	1.9557e-69	1.63162e-68
gene106500	-1.67753	4.85701	2.41539e-69	2.0121e-68
gene109002	-1.71396	4.86605	2.92187e-69	2.43036e-68
gene103997	2.36929	4.13441	4.22048e-69	3.50527e-68
gene108160	-2.46106	4.44732	4.38862e-69	3.63947e-68
gene113466	1.52808	7.47381	5.53939e-69	4.58695e-68
gene105476	-1.99542	4.27788	6.19556e-69	5.12265e-68
gene113414	1.50221	6.41281	6.21104e-69	5.12781e-68
gene106052	-1.60562	4.74517	8.69857e-69	7.17083e-68
gene111848	-1.72475	6.16903	9.23695e-69	7.60335e-68
gene106640	-2.1434	5.77161	9.3341e-69	7.67194e-68
gene112702	2.29282	8.10935	1.34609e-68	1.10475e-67
gene107134	-1.40092	5.41112	1.49729e-68	1.22703e-67
gene113976	-1.49513	8.43282	1.60265e-68	1.31143e-67
gene108280	-3.15189	3.75798	3.5476e-68	2.89869e-67
gene106170	3.20645	2.51062	7.78256e-68	6.34965e-67
gene105466	-2.25768	2.79517	1.4206e-67	1.15734e-66
gene112744	2.15785	5.83038	1.73685e-67	1.41291e-66
gene106242	-1.50854	5.46473	2.02936e-67	1.64845e-66
gene107922	-1.61776	5.50172	2.69672e-67	2.18734e-66
gene102891	1.35045	6.97673	3.49522e-67	2.83087e-66
gene105414	-1.55421	6.42043	3.86992e-67	3.12978e-66
gene103079	-2.68386	3.11786	5.63409e-67	4.54992e-66
gene108808	1.93084	8.64833	7.29748e-67	5.88465e-66
gene107958	-1.358	7.82587	1.4593e-66	1.17506e-65
gene106372	-1.72273	4.3349	1.6207e-66	1.30314e-65
gene102893	1.37231	5.63866	1.82629e-66	1.46632e-65
gene106078	1.35683	6.66682	1.97866e-66	1.58636e-65
gene107858	1.4664	7.56828	2.06077e-66	1.6498e-65
gene108186	-2.46206	3.13241	2.55859e-66	2.04539e-65
gene102911	2.05804	5.51288	4.80702e-66	3.83732e-65
gene109739	-1.69689	5.99133	5.28421e-66	4.21218e-65
gene107098	-2.54125	2.77668	5.59829e-66	4.45614e-65
gene106148	-1.60157	7.41102	7.4448e-66	5.91744e-65
gene109010	-1.38562	7.94494	1.07141e-65	8.50387e-65
gene102931	1.48011	5.89418	1.13613e-65	9.00466e-65
gene105042	2.72762	4.81125	1.26726e-65	1.00296e-64
gene110274	1.43129	9.40774	2.88247e-65	2.27805e-64
gene113764	1.42515	7.18571	3.10959e-65	2.45406e-64
gene109279	-3.13771	6.14601	3.50327e-65	2.76081e-64
gene105106	-2.04351	4.22251	3.67998e-65	2.89596e-64
gene110021	-2.31359	3.21811	4.23233e-65	3.32591e-64
gene112874	1.30408	6.85259	8.77955e-65	6.88953e-64
gene104340	-1.96119	8.69971	9.56788e-65	7.48747e-64
gene105480	-2.7367	3.06255	9.56853e-65	7.48747e-64
gene109693	1.497	5.54704	1.58355e-64	1.2374e-63
gene110576	1.44189	6.75473	1.7564e-64	1.37053e-63
gene108842	-1.48381	5.61516	1.84782e-64	1.43984e-63
gene106828	-1.82583	4.83893	2.25537e-64	1.75495e-63
gene108570	-1.57717	4.7123	3.21189e-64	2.49573e-63
gene112742	2.2541	5.75968	3.35866e-64	2.60613e-63
gene111846	-1.66114	5.64895	3.4485e-64	2.67211e-63
gene107866	-1.46215	5.99532	3.90143e-64	3.01884e-63
gene108936	1.58226	5.03388	4.60951e-64	3.56178e-63
gene113108	1.77254	9.99684	7.24649e-64	5.59159e-63
gene103893	1.36249	7.55905	1.17344e-63	9.04199e-63
gene106520	-2.30641	3.32753	2.40115e-63	1.84766e-62
gene112614	-1.39096	7.4275	2.6944e-63	2.07044e-62
gene112161	-1.23876	7.20017	4.16683e-63	3.19745e-62
gene108580	-1.95451	3.87526	5.50768e-63	4.22052e-62
gene104189	1.77868	4.47635	8.62868e-63	6.60302e-62
gene104574	1.9656	4.7666	9.78019e-63	7.4739e-62
gene107118	-3.07396	2.24322	1.0135e-62	7.73435e-62
gene112370	1.31875	6.10021	1.52896e-62	1.1652e-61
gene111668	1.29278	7.83389	5.50969e-62	4.19311e-61
gene105470	-2.34183	2.72531	6.46241e-62	4.91143e-61
gene109201	2.21849	7.52112	7.6533e-62	5.80855e-61
gene111818	1.32933	6.2852	8.20586e-62	6.21941e-61
gene103357	1.55203	5.07585	9.30322e-62	7.04151e-61
gene112274	-1.41976	4.83705	1.01045e-61	7.63756e-61
gene111562	-1.87768	5.21103	1.78263e-61	1.34558e-60
gene106234	-1.71709	4.45568	2.14709e-61	1.61849e-60
gene106128	1.32187	6.27582	2.20796e-61	1.66211e-60
gene109859	-2.49931	3.01353	2.27242e-61	1.70832e-60
gene108998	-1.38126	5.23401	3.38979e-61	2.54486e-60
gene108690	-1.95379	3.98488	3.69024e-61	2.76668e-60
gene103399	1.28441	7.67627	3.72789e-61	2.79114e-60
gene109008	-1.23264	6.27842	4.21573e-61	3.15214e-60
gene110606	2.11462	3.56151	4.39604e-61	3.28254e-60
gene106430	-1.31769	5.27744	5.98053e-61	4.45968e-60
gene103817	-1.75086	3.96809	6.6527e-61	4.95425e-60
gene108544	-1.40429	5.49091	8.18945e-61	6.09049e-60
gene108540	-1.644	5.47887	8.62482e-61	6.40569e-60
gene105048	-1.31716	6.67407	9.09592e-61	6.74654e-60
gene104356	-1.90357	3.89167	1.19108e-60	8.82256e-60
gene108364	-1.84267	4.08696	1.21214e-60	8.96657e-60
gene103707	1.35673	5.32405	1.41363e-60	1.04432e-59
gene111830	-2.05422	8.67158	1.57019e-60	1.15843e-59
gene110490	-2.18707	3.1569	1.6627e-60	1.22506e-59
gene108602	-1.40326	5.87298	1.80458e-60	1.32783e-59
gene108578	-1.83026	5.21081	2.07938e-60	1.528e-59
gene109671	-1.38641	5.42709	2.59979e-60	1.90789e-59
gene110065	-1.43004	9.83353	4.39949e-60	3.22435e-59
gene107258	-1.3665	5.51881	4.73644e-60	3.46672e-59
gene110754	1.83644	4.24243	6.13538e-60	4.48473e-59
gene111844	-1.36998	6.01788	7.68523e-60	5.61022e-59
gene107882	-1.83473	7.42577	7.71684e-60	5.62589e-59
gene102883	1.46451	5.15189	1.08064e-59	7.86794e-59
gene102913	1.54424	7.98698	1.17446e-59	8.53985e-59
gene108494	1.92721	4.25954	1.38921e-59	1.00881e-58
gene103085	-1.82561	7.52827	1.44708e-59	1.04946e-58
gene103829	-2.15044	9.31428	1.45345e-59	1.05271e-58
gene102881	1.34891	7.27121	1.81705e-59	1.31434e-58
gene103853	-1.33375	5.83618	1.98897e-59	1.43682e-58
gene103863	1.74193	7.79958	2.10847e-59	1.52117e-58
gene106154	2.86431	2.3676	2.24718e-59	1.61914e-58
gene106948	-1.57067	4.543	2.5425e-59	1.82955e-58
gene103093	-1.32442	7.00641	2.75375e-59	1.97899e-58
gene110400	1.37647	6.54273	3.20891e-59	2.30311e-58
gene103503	-1.57767	4.42256	5.95115e-59	4.26576e-58
gene277685	-1.44099	4.70215	6.30798e-59	4.5157e-58
gene113120	1.42353	5.70962	7.98712e-59	5.70969e-58
gene111130	-2.02207	3.02915	7.99645e-59	5.70969e-58
gene111460	-1.23614	6.14039	8.73299e-59	6.22758e-58
gene110696	2.61654	3.20093	9.83615e-59	7.00526e-58
gene103367	-1.58559	8.08521	1.03481e-58	7.3604e-58
gene110826	1.21116	6.87517	1.33573e-58	9.48865e-58
gene102919	1.65329	5.62609	1.44781e-58	1.02717e-57
gene104352	-1.58743	5.01458	1.79946e-58	1.27502e-57
gene113284	-1.4236	4.86742	2.04317e-58	1.44586e-57
gene110686	-1.39204	6.43163	2.26275e-58	1.5992e-57
gene107678	-1.30371	6.08123	3.32444e-58	2.34657e-57
gene104185	2.82869	2.44343	3.39984e-58	2.39674e-57
gene104013	2.23696	3.99781	4.99674e-58	3.51801e-57
gene109711	2.41653	3.80815	5.0325e-58	3.53869e-57
gene108568	-1.58594	5.45085	5.39777e-58	3.79074e-57
gene110203	-1.48859	9.27039	1.01005e-57	7.08442e-57
gene106172	4.05338	2.20007	1.06768e-57	7.47913e-57
gene111108	-2.49977	3.0371	1.12179e-57	7.84825e-57
gene110464	1.23095	7.0662	1.23576e-57	8.63472e-57
gene113142	1.20972	6.9299	1.34906e-57	9.41454e-57
gene113072	-2.31112	4.11911	2.08992e-57	1.45665e-56
gene106594	-3.01912	1.77664	2.33588e-57	1.62603e-56
gene111582	-1.27019	7.4251	3.42095e-57	2.37838e-56
gene105510	-1.40278	5.78068	3.91007e-57	2.71503e-56
gene106300	-1.67755	4.10295	4.76528e-57	3.30472e-56
gene109076	2.05374	5.25494	6.11262e-57	4.23381e-56
gene111674	1.43313	8.60207	6.48066e-57	4.48313e-56
gene111672	1.29959	8.72297	7.04403e-57	4.86678e-56
gene104734	-1.95248	6.81453	7.13195e-57	4.9214e-56
gene107180	-1.17674	5.9601	7.70073e-57	5.30728e-56
gene108650	-1.51676	4.59049	9.48603e-57	6.52959e-56
gene103993	2.13925	3.18995	1.16711e-56	8.02372e-56
gene106314	-1.31561	8.56721	1.24522e-56	8.55008e-56
gene108582	-1.55323	4.46393	1.27041e-56	8.71231e-56
gene105418	2.08421	4.51886	1.46075e-56	1.00052e-55
gene107896	-1.34944	6.65675	1.66012e-56	1.13568e-55
gene106074	-1.55157	5.17639	1.77989e-56	1.21611e-55
gene112086	1.58837	5.11635	1.78926e-56	1.22101e-55
gene110850	-1.34122	7.04326	3.45961e-56	2.35798e-55
gene103909	-1.90643	3.5628	3.59717e-56	2.44872e-55
gene105964	-2.30217	6.6084	4.34443e-56	2.95379e-55
gene105104	-3.37011	2.38024	5.37334e-56	3.64888e-55
gene109987	-1.67648	6.23507	1.29082e-55	8.75485e-55
gene104047	1.50349	7.59081	1.54226e-55	1.04474e-54
gene104326	-1.61197	5.16529	2.29307e-55	1.55146e-54
gene111372	1.59181	8.41152	2.36799e-55	1.60019e-54
gene107068	-1.96975	3.7904	6.16323e-55	4.1598e-54
gene106260	-1.5397	4.71695	6.45761e-55	4.3532e-54
gene104444	-2.68806	2.64596	7.67533e-55	5.16781e-54
gene105974	2.86672	2.47071	9.44586e-55	6.35219e-54
gene104023	2.49014	3.81064	9.99248e-55	6.71166e-54
gene106672	1.2816	7.31558	1.02028e-54	6.84463e-54
gene108338	1.52327	5.28106	2.17616e-54	1.45813e-53
gene111606	-1.89196	3.4745	4.09816e-54	2.74265e-53
gene104642	-1.60974	3.76021	6.61139e-54	4.41928e-53
gene110326	1.33588	6.96443	6.71998e-54	4.48646e-53
gene104039	1.46484	7.88292	8.13734e-54	5.4262e-53
gene104548	1.30116	8.05654	8.70481e-54	5.79763e-53
gene112272	-1.45079	4.50285	8.9552e-54	5.95725e-53
gene107360	-1.39591	7.73669	1.18243e-53	7.85645e-53
gene112300	1.25616	6.53746	1.52046e-53	1.00903e-52
gene106486	-1.26322	5.55152	1.55735e-53	1.03228e-52
gene106368	2.03989	3.4911	1.89407e-53	1.25397e-52
gene106144	1.19736	6.68988	2.36029e-53	1.56077e-52
gene104552	1.32983	8.88875	2.38765e-53	1.57698e-52
gene102989	1.70391	5.40326	2.68062e-53	1.76838e-52
gene110242	-1.95176	8.29519	2.99589e-53	1.97402e-52
gene113052	-1.67137	5.63723	3.24394e-53	2.13492e-52
gene113068	-4.38145	3.73687	3.43705e-53	2.25933e-52
gene110716	1.22989	6.49939	3.45995e-53	2.27169e-52
gene109014	-1.36032	8.2802	3.64866e-53	2.39276e-52
gene107968	-1.27729	7.87713	3.74022e-53	2.44991e-52
gene112440	-1.67869	3.81955	3.87995e-53	2.53844e-52
gene106048	1.36453	5.84626	3.93819e-53	2.57351e-52
gene104358	-1.36067	5.68171	4.8843e-53	3.18801e-52
gene105794	-1.34695	5.44465	5.12166e-53	3.33901e-52
gene107708	-2.84748	1.77497	5.6927e-53	3.70694e-52
gene103603	-1.82567	3.96126	9.96131e-53	6.47894e-52
gene111798	1.25977	6.91767	1.21361e-52	7.88421e-52
gene107020	-1.76672	3.71105	1.35941e-52	8.82107e-52
gene105892	1.59678	8.76375	1.64656e-52	1.06718e-51
gene103859	1.37501	4.66915	2.54944e-52	1.65044e-51
gene109349	1.44027	8.75085	2.60406e-52	1.68383e-51
gene112430	1.61783	4.79974	4.76162e-52	3.07537e-51
gene106798	1.49594	8.55889	4.90547e-52	3.1646e-51
gene104157	-1.24283	5.36805	6.59078e-52	4.24688e-51
gene110296	-1.28704	5.79917	8.01527e-52	5.15879e-51
gene104896	-1.43599	4.73839	8.35327e-52	5.37009e-51
gene109735	1.5663	7.44769	8.44068e-52	5.42001e-51
gene111724	1.53908	6.89284	1.22964e-51	7.88677e-51
gene112096	-1.3514	5.22866	1.24011e-51	7.9447e-51
gene113236	-2.16764	4.08952	1.30926e-51	8.37803e-51
gene106076	1.79639	3.78064	1.32172e-51	8.44802e-51
gene109521	1.23581	8.25863	1.79651e-51	1.14695e-50
gene105224	2.28496	3.3819	2.01674e-51	1.28608e-50
gene109475	-2.49931	7.47834	2.08067e-51	1.32532e-50
gene106156	1.50725	4.3883	2.2474e-51	1.42988e-50
gene107442	-1.38164	4.55967	2.99698e-51	1.90461e-50
gene108354	-2.15975	3.37884	4.02504e-51	2.55503e-50
gene113888	-1.24891	5.69581	4.53788e-51	2.87728e-50
gene107084	-1.80358	4.07302	5.04157e-51	3.193e-50
gene105430	-3.61479	6.28477	5.75656e-51	3.64166e-50
gene102921	1.47	5.83451	5.99385e-51	3.78745e-50
gene107160	-1.8266	3.91556	6.07096e-51	3.83182e-50
gene108092	1.36499	4.94478	7.78681e-51	4.90923e-50
gene107648	-1.37977	5.64753	9.14433e-51	5.75854e-50
gene105584	-1.27475	5.52361	9.65785e-51	6.07503e-50
gene111662	1.21177	7.81351	9.75593e-51	6.12977e-50
gene104245	-1.2253	7.41496	1.01647e-50	6.37937e-50
gene103959	1.43111	5.97315	1.12002e-50	7.02135e-50
gene111476	1.32593	5.18703	1.123e-50	7.03205e-50
gene111580	-1.34249	5.87427	1.13738e-50	7.1141e-50
gene108576	-2.11607	3.48908	1.64678e-50	1.02887e-49
gene105710	-1.29918	5.38946	2.22e-50	1.38544e-49
gene113318	1.20327	5.28272	2.4374e-50	1.5194e-49
gene110440	1.15625	7.36596	2.6119e-50	1.62635e-49
gene111870	-1.57288	4.72157	2.83773e-50	1.76499e-49
gene107434	-1.69376	3.84413	3.51705e-50	2.18506e-49
gene102991	1.99223	5.1643	3.73472e-50	2.3177e-49
gene110552	-1.50703	7.99159	3.9736e-50	2.46319e-49
gene105158	-1.91049	4.72913	4.16343e-50	2.57798e-49
gene110278	1.37764	6.3347	4.43788e-50	2.74485e-49
gene108218	-1.45073	4.64944	5.79899e-50	3.58271e-49
gene107096	-2.07078	2.65642	6.83792e-50	4.21989e-49
gene109477	-2.7277	7.53007	7.90889e-50	4.87539e-49
gene105172	-1.26177	7.5472	8.11688e-50	4.99805e-49
gene109547	2.06697	6.03976	1.15275e-49	7.09033e-49
gene110304	1.4587	9.47201	1.16851e-49	7.17926e-49
gene133898	1.151	6.89084	1.29176e-49	7.92775e-49
gene112193	1.20813	6.51309	1.46101e-49	8.95655e-49
gene104316	1.44987	8.89252	1.48848e-49	9.1149e-49
gene112718	-1.32987	4.4878	1.50381e-49	9.19863e-49
gene113804	-2.03804	4.12289	1.65396e-49	1.01059e-48
gene110023	1.66416	7.01299	2.35835e-49	1.4394e-48
gene112750	1.47984	5.11898	2.57742e-49	1.57137e-48
gene110520	1.13872	7.03874	2.65653e-49	1.61783e-48
gene103467	-1.63829	4.377	2.87802e-49	1.7508e-48
gene105342	-1.13502	6.17459	3.01983e-49	1.83505e-48
gene104492	1.35629	6.1721	3.49541e-49	2.12172e-48
gene113066	-3.57589	4.42244	4.54589e-49	2.75635e-48
gene109167	-1.24659	5.00408	5.22381e-49	3.16394e-48
gene108694	-1.2152	5.08325	7.40707e-49	4.4814e-48
gene103831	-1.35882	6.85425	9.25101e-49	5.59091e-48
gene105144	-1.29447	5.22246	1.18699e-48	7.16587e-48
gene113892	1.24444	6.28534	1.41921e-48	8.55845e-48
gene113890	1.20557	6.37008	1.63455e-48	9.84635e-48
gene103491	-1.22399	5.32698	1.64235e-48	9.88259e-48
gene105872	1.41159	9.00451	2.02994e-48	1.22016e-47
gene107280	-1.36692	9.90164	2.12071e-48	1.27334e-47
gene107738	-1.34638	4.58935	2.56859e-48	1.5406e-47
gene103017	1.34946	4.94914	2.78769e-48	1.67021e-47
gene113546	1.33905	6.28298	2.99891e-48	1.79482e-47
gene112352	1.38727	7.02713	3.09084e-48	1.84784e-47
gene112187	1.58878	6.98494	3.90739e-48	2.3335e-47
gene109503	1.29847	6.58317	4.02881e-48	2.40343e-47
gene113538	1.45612	8.58545	4.58389e-48	2.73163e-47
gene107440	-1.48828	4.71342	6.49548e-48	3.86662e-47
gene105288	-2.76074	2.20982	6.74374e-48	4.0101e-47
gene107660	-2.57034	3.06436	7.19102e-48	4.27149e-47
gene110121	1.13384	7.02566	8.00437e-48	4.74955e-47
gene105034	-1.75476	3.17259	8.20436e-48	4.86301e-47
gene107256	-1.07954	5.94572	8.48243e-48	5.02247e-47
gene104187	2.08547	3.17426	1.29269e-47	7.64587e-47
gene110544	1.53014	4.58882	1.40223e-47	8.28493e-47
gene111746	1.13439	7.44376	1.47289e-47	8.69319e-47
gene106722	2.09599	3.06036	1.47588e-47	8.70158e-47
gene113634	-2.14807	5.47434	1.71996e-47	1.01299e-46
gene112356	1.9384	6.01475	1.85561e-47	1.09172e-46
gene108524	-1.09436	6.13312	2.7901e-47	1.63978e-46
gene111282	-1.674	7.46759	3.42231e-47	2.00921e-46
gene109395	-1.37785	4.29179	4.94106e-47	2.89778e-46
gene112264	-1.76564	4.31249	5.24119e-47	3.07055e-46
gene134020	1.33788	8.20877	5.29597e-47	3.09937e-46
gene111584	-1.1044	7.30708	5.70457e-47	3.33498e-46
gene103895	1.23786	7.01973	7.90061e-47	4.61395e-46
gene113790	-1.27264	7.55207	9.72442e-47	5.67309e-46
gene105922	-1.11249	6.30155	1.1069e-46	6.45074e-46
gene109617	-1.14544	5.47529	1.16295e-46	6.77027e-46
gene105820	1.32179	6.35395	1.35783e-46	7.89651e-46
gene102885	1.34055	5.43523	1.52944e-46	8.88514e-46
gene107556	-1.19332	7.38443	1.73431e-46	1.00648e-45
gene107036	1.42901	4.98445	1.8757e-46	1.0874e-45
gene105484	-1.54016	4.32888	2.09062e-46	1.21073e-45
gene105434	-1.77649	3.52908	2.15524e-46	1.24685e-45
gene111670	1.17412	8.46744	2.30018e-46	1.32931e-45
gene134048	1.16581	6.06534	3.11423e-46	1.79789e-45
gene110011	-1.80804	3.3063	3.34657e-46	1.93002e-45
gene113054	-1.465	5.38493	4.24764e-46	2.44713e-45
gene113164	1.07213	7.30807	4.94404e-46	2.84539e-45
gene108336	1.18706	5.72364	5.77707e-46	3.32137e-45
gene103031	-2.23465	2.90465	6.20773e-46	3.56527e-45
gene106840	-1.76579	3.37985	8.41635e-46	4.82874e-45
gene104594	-1.02824	6.54487	8.95207e-46	5.13079e-45
gene111510	-1.15081	5.9718	9.24934e-46	5.2957e-45
gene106152	2.51437	2.13651	9.34537e-46	5.34517e-45
gene111796	1.12799	5.38942	9.43492e-46	5.39083e-45
gene134046	1.06932	6.3813	1.13677e-45	6.48849e-45
gene110662	-1.20572	7.99262	1.14801e-45	6.5459e-45
gene110650	1.76796	3.80127	2.27777e-45	1.29744e-44
gene103879	-1.22254	5.3876	2.29716e-45	1.30714e-44
gene106668	-1.04878	6.44906	2.61688e-45	1.48755e-44
gene107732	-1.73961	3.5597	2.93119e-45	1.66451e-44
gene104233	-1.52871	3.81876	3.5357e-45	2.00573e-44
gene107886	-1.48041	6.08861	5.01073e-45	2.83959e-44
gene113854	-1.06857	5.84462	5.25696e-45	2.97608e-44
gene109681	2.7322	4.39453	5.55477e-45	3.14148e-44
gene105364	2.1353	3.5943	5.58462e-45	3.15514e-44
gene112890	1.06763	7.33093	5.6758e-45	3.20339e-44
gene112876	1.16298	7.05025	6.13419e-45	3.45859e-44
gene110019	-2.53642	1.95298	6.21911e-45	3.5029e-44
gene104029	1.72722	3.609	6.35987e-45	3.57856e-44
gene109050	-1.07276	6.30247	9.34201e-45	5.25121e-44
gene111240	-2.17218	3.95978	9.93537e-45	5.57909e-44
gene109335	-1.19281	5.44325	1.05349e-44	5.9098e-44
gene106006	-1.13443	6.22976	1.23045e-44	6.89548e-44
gene110286	-1.79806	3.61691	1.35799e-44	7.60255e-44
gene103249	1.76345	4.31458	1.42616e-44	7.97616e-44
gene106858	1.91232	3.51809	1.96571e-44	1.09826e-43
gene106874	-1.42852	4.32143	2.13478e-44	1.19153e-43
gene107890	-1.32212	5.38268	2.2808e-44	1.27175e-43
gene113874	1.10958	7.55202	2.55314e-44	1.42217e-43
gene110842	1.08808	7.18606	2.85889e-44	1.59088e-43
gene106082	1.2521	8.00534	4.58762e-44	2.55031e-43
gene112484	1.59827	5.03423	5.3834e-44	2.9897e-43
gene111132	-2.05088	3.11931	6.62045e-44	3.67302e-43
gene103639	-1.42525	5.55581	6.66732e-44	3.69534e-43
gene104041	1.2554	7.60634	7.10546e-44	3.93424e-43
gene111474	1.21575	5.9847	7.85623e-44	4.3456e-43
gene107884	-1.75363	7.72293	9.47988e-44	5.23848e-43
gene109793	1.32452	7.17217	1.16399e-43	6.42569e-43
gene105926	-1.21784	4.80723	1.6808e-43	9.26946e-43
gene109519	1.17799	8.57722	2.13842e-43	1.17815e-42
gene103393	-1.49017	6.97586	2.44653e-43	1.34656e-42
gene111656	1.08175	7.55274	3.45723e-43	1.90096e-42
gene102887	1.09719	8.02328	3.86453e-43	2.12281e-42
gene111884	-1.18585	9.95337	4.95477e-43	2.719e-42
gene113326	1.5033	5.35863	5.05211e-43	2.76967e-42
gene113774	-2.0996	7.31028	5.51219e-43	3.01892e-42
gene106802	-1.32098	7.64958	5.6501e-43	3.0914e-42
gene110578	1.24665	7.2908	5.86595e-43	3.20633e-42
gene109655	-1.51273	6.70437	6.09053e-43	3.32582e-42
gene109871	1.18378	6.87599	8.0385e-43	4.38521e-42
gene106038	2.54248	3.95401	8.37203e-43	4.56268e-42
gene104412	-1.65255	3.40017	1.03607e-42	5.64095e-42
gene106174	3.77761	1.13659	1.12628e-42	6.12607e-42
gene111242	-3.67725	7.86279	1.19806e-42	6.51011e-42
gene112700	1.31772	6.87803	1.23574e-42	6.7083e-42
gene113064	-3.1709	4.03584	1.43817e-42	7.79956e-42
gene103931	1.06582	7.28278	1.53776e-42	8.33151e-42
gene112076	-1.25874	8.63683	2.11828e-42	1.14656e-41
gene109709	2.94864	2.55211	2.28343e-42	1.23474e-41
gene109203	2.1195	6.36448	2.58057e-42	1.39406e-41
gene109797	1.3211	4.60557	2.96257e-42	1.59886e-41
gene112211	-2.09205	2.24952	3.05244e-42	1.64576e-41
gene112992	-1.1678	7.67273	3.87926e-42	2.08953e-41
gene106506	-2.05079	6.3381	4.13945e-42	2.22751e-41
gene111462	-1.22995	5.34868	4.61562e-42	2.48134e-41
gene111408	1.06605	8.03537	5.04075e-42	2.70727e-41
gene104972	1.0789	6.56637	5.64806e-42	3.03051e-41
gene102815	1.07638	7.94339	5.91239e-42	3.16927e-41
gene113106	1.18282	7.11842	6.95872e-42	3.72654e-41
gene112982	-1.02486	7.21253	8.76399e-42	4.68878e-41
gene104936	1.12026	7.34145	9.83756e-42	5.25807e-41
gene107646	-1.62126	3.59101	1.10352e-41	5.89251e-41
gene103431	-1.63578	3.59461	1.31195e-41	6.99873e-41
gene112878	1.12639	8.25035	1.40175e-41	7.47063e-41
gene106530	-1.39188	4.05753	1.706e-41	9.08338e-41
gene108306	-1.74355	3.65488	2.07805e-41	1.10537e-40
gene105468	-1.56193	3.81443	2.48488e-41	1.32051e-40
gene107262	-1.2507	4.37631	3.1477e-41	1.67114e-40
gene112314	1.08431	8.2597	3.34367e-41	1.77349e-40
gene103395	-1.15327	8.07103	5.23665e-41	2.77487e-40
gene113448	1.06779	6.54362	5.68363e-41	3.00885e-40
gene111290	1.19865	8.03639	5.76522e-41	3.04914e-40
gene103303	1.80162	5.2113	6.49474e-41	3.4317e-40
gene111782	-1.21716	7.01014	6.51151e-41	3.43728e-40
gene104956	1.04256	8.25939	7.35169e-41	3.87711e-40
gene110244	1.25923	5.73086	8.23452e-41	4.33857e-40
gene110163	-1.33951	6.72953	1.13849e-40	5.99276e-40
gene106756	-1.98046	2.60494	1.14141e-40	6.00241e-40
gene108054	-1.37043	9.58512	1.20702e-40	6.34143e-40
gene112016	1.26127	4.65291	1.46741e-40	7.70214e-40
gene103819	1.09647	6.62566	1.47471e-40	7.73316e-40
gene112618	-1.24362	7.36216	1.66213e-40	8.70772e-40
gene110546	1.37985	4.20299	1.76078e-40	9.21585e-40
gene112175	1.06971	6.52659	1.79329e-40	9.37714e-40
gene102873	1.13132	9.7519	1.85382e-40	9.68456e-40
gene108230	-1.64189	3.38189	2.10914e-40	1.1008e-39
gene106436	-1.07233	6.91343	2.1653e-40	1.12905e-39
gene111044	-1.13392	6.93348	2.16747e-40	1.12912e-39
gene111214	1.03595	5.54896	2.17472e-40	1.13183e-39
gene109078	1.51934	5.30282	2.20232e-40	1.14512e-39
gene105672	1.0067	7.36565	2.48843e-40	1.29268e-39
gene113766	1.05245	8.50148	2.51832e-40	1.30698e-39
gene105004	-1.21742	5.47053	2.84624e-40	1.47579e-39
gene110185	1.19833	5.62404	2.9512e-40	1.52878e-39
gene108988	1.35812	5.98534	3.88912e-40	2.01277e-39
gene109479	-2.85708	8.49228	4.99812e-40	2.5843e-39
gene112098	-1.21267	5.91094	5.4782e-40	2.82989e-39
gene105560	1.29588	5.10317	6.31534e-40	3.2593e-39
gene108356	-2.03772	2.86953	6.68312e-40	3.44591e-39
gene103055	2.54127	3.08873	6.86065e-40	3.53416e-39
gene111718	1.02386	6.52966	6.92515e-40	3.56407e-39
gene108554	1.38618	5.24601	7.71536e-40	3.96708e-39
gene113144	-1.15808	7.4262	8.12601e-40	4.17436e-39
gene104958	1.04992	8.11437	8.59146e-40	4.40938e-39
gene112892	0.978663	6.98948	8.82542e-40	4.52527e-39
gene113588	1.24916	5.20412	9.06994e-40	4.64635e-39
gene112088	1.56799	3.827	9.78071e-40	5.00585e-39
gene104530	-1.24688	9.53474	1.05263e-39	5.38246e-39
gene103441	1.18484	5.75409	1.10558e-39	5.64802e-39
gene106554	-2.27586	3.22853	1.1575e-39	5.90782e-39
gene112358	1.276	8.47787	1.35902e-39	6.92999e-39
gene109165	-2.18299	2.82702	1.71068e-39	8.71521e-39
gene106446	-1.03823	8.34031	1.73287e-39	8.82016e-39
gene109417	-1.09968	6.96483	1.88918e-39	9.60695e-39
gene111974	1.02127	6.38387	2.09911e-39	1.06647e-38
gene103087	-1.0531	5.25948	2.5878e-39	1.31355e-38
gene112840	2.01927	2.78247	2.66871e-39	1.35338e-38
gene109401	2.04162	2.71059	2.67588e-39	1.35578e-38
gene103885	1.23547	5.94967	2.72715e-39	1.38049e-38
gene107082	-1.7963	3.34112	2.79369e-39	1.41289e-38
gene106508	-2.82329	3.86664	2.90117e-39	1.46591e-38
gene106810	-1.66127	9.25495	3.54527e-39	1.78973e-38
gene108542	-1.03638	6.11576	3.57134e-39	1.80125e-38
gene111374	1.27811	6.80483	4.07929e-39	2.05557e-38
gene105432	-1.83999	2.86358	4.2539e-39	2.14162e-38
gene106456	1.40218	7.35516	4.56642e-39	2.29687e-38
gene111508	-1.04104	5.28651	5.30788e-39	2.6674e-38
gene112185	1.60202	8.33131	6.10346e-39	3.06443e-38
gene104051	-1.1141	5.62553	6.77943e-39	3.40075e-38
gene109056	-1.91696	8.29283	7.87192e-39	3.9452e-38
gene113802	-1.32032	5.49963	8.56956e-39	4.29097e-38
gene112348	1.05124	11.3694	1.05951e-38	5.30041e-38
gene102811	-1.22121	9.65299	1.12432e-38	5.61959e-38
gene104924	0.978493	6.96016	1.28851e-38	6.43443e-38
gene108810	0.963652	6.51971	1.33762e-38	6.67366e-38
gene104942	1.01858	7.01171	1.63249e-38	8.13751e-38
gene112177	1.08242	7.05314	1.67678e-38	8.35078e-38
gene112706	1.3672	8.90838	1.75842e-38	8.7495e-38
gene104644	-1.44568	3.61437	1.8265e-38	9.08013e-38
gene103235	-1.11085	6.10065	1.86154e-38	9.24603e-38
gene112326	-0.949843	6.89545	2.0143e-38	9.99585e-38
gene107934	1.12668	5.35644	2.02047e-38	1.00175e-37
gene104570	1.80203	5.7506	2.10799e-38	1.04421e-37
gene111976	1.0363	8.11686	2.18797e-38	1.08286e-37
gene104528	-2.91809	9.64524	2.28634e-38	1.13053e-37
gene112806	1.04866	6.41128	2.57252e-38	1.27091e-37
gene105708	-1.28798	4.72093	2.62551e-38	1.29594e-37
gene103837	-1.39535	4.50036	2.65741e-38	1.31052e-37
gene109523	1.15353	7.89959	2.78063e-38	1.37007e-37
gene110099	1.07349	9.42792	2.99466e-38	1.47421e-37
gene107248	-1.21969	6.46445	3.77624e-38	1.85732e-37
gene110394	-1.26241	4.68227	5.71344e-38	2.80763e-37
gene106274	-0.990887	7.05961	5.81246e-38	2.85376e-37
gene108844	-1.08444	5.25886	6.61705e-38	3.24592e-37
gene110035	2.51159	2.00001	6.70653e-38	3.28691e-37
gene105930	-1.13215	10.0851	6.93982e-38	3.39824e-37
gene112646	1.31502	5.10043	7.80325e-38	3.81767e-37
gene102851	-1.35702	5.80851	8.29455e-38	4.05446e-37
gene111376	1.221	8.54986	8.54025e-38	4.17089e-37
gene110211	-0.978583	6.21705	8.56243e-38	4.17805e-37
gene110077	-1.27317	8.08189	9.62032e-38	4.69012e-37
gene111810	-1.06612	5.3767	1.00537e-37	4.89711e-37
gene107508	-1.33497	4.9227	1.13975e-37	5.5468e-37
gene111090	-1.03928	5.43922	1.59079e-37	7.73507e-37
gene111658	1.00405	7.98048	1.84901e-37	8.98278e-37
gene113394	1.01439	8.05866	2.14568e-37	1.04149e-36
gene109072	2.53265	2.9451	2.26602e-37	1.09894e-36
gene113312	-1.37292	3.6033	2.3934e-37	1.1597e-36
gene112842	1.75122	3.23669	2.47108e-37	1.1963e-36
gene106604	-1.26612	4.32668	2.85705e-37	1.38195e-36
gene108016	1.05528	8.86699	3.15058e-37	1.5226e-36
gene104872	1.0302	9.74528	3.56827e-37	1.72296e-36
gene111676	1.33011	5.45869	3.65971e-37	1.76557e-36
gene108746	1.11848	6.85221	4.32162e-37	2.08309e-36
gene104274	1.29875	8.7571	4.67053e-37	2.24931e-36
gene106764	-1.11721	5.18425	4.89401e-37	2.3549e-36
gene111142	-2.61089	1.3616	5.09361e-37	2.44882e-36
gene110822	1.04644	7.61589	5.67383e-37	2.7254e-36
gene113576	1.4544	5.39697	5.68773e-37	2.72972e-36
gene105000	1.12508	5.31604	7.01568e-37	3.36413e-36
gene107918	-2.25359	2.40661	9.32123e-37	4.46582e-36
gene110466	1.08756	5.69428	1.01189e-36	4.84382e-36
gene112770	1.05134	5.90311	1.17282e-36	5.60932e-36
gene104922	1.02254	5.6661	1.32261e-36	6.3203e-36
gene113782	-1.05697	6.28814	1.43779e-36	6.86477e-36
gene111574	-0.907235	6.01061	1.4842e-36	7.08028e-36
gene111174	-2.15506	2.12577	1.62145e-36	7.72837e-36
gene110636	-1.11247	6.73667	1.67647e-36	7.98372e-36
gene160433	-1.65077	5.61367	1.73023e-36	8.23271e-36
gene102889	1.00411	6.35725	1.9491e-36	9.26615e-36
gene113788	-1.13626	7.35199	2.10776e-36	1.00118e-35
gene108046	1.02514	6.90056	2.34095e-36	1.111e-35
gene108428	1.66568	5.40339	2.36037e-36	1.11926e-35
gene110250	1.11167	8.52729	2.74185e-36	1.29904e-35
gene103857	1.26286	4.51648	2.83455e-36	1.34182e-35
gene110270	1.11344	4.9261	3.15432e-36	1.49191e-35
gene111646	-1.11609	7.57641	3.49135e-36	1.64991e-35
gene134014	1.19602	5.7558	4.19398e-36	1.98027e-35
gene105740	-1.38531	3.62841	4.54209e-36	2.14282e-35
gene113826	1.12387	6.32267	4.75263e-36	2.24024e-35
gene104001	2.10599	2.21811	5.42849e-36	2.55665e-35
gene103297	1.71838	5.90045	6.33194e-36	2.97961e-35
gene110508	-1.2672	4.60344	7.04808e-36	3.31379e-35
gene113554	-1.68286	7.325	8.23037e-36	3.86639e-35
gene108334	1.63161	3.70814	8.31816e-36	3.90433e-35
gene110061	1.59364	5.8145	9.25932e-36	4.34241e-35
gene107252	-1.03576	5.88284	9.26879e-36	4.34318e-35
gene111666	1.10469	8.61699	9.67524e-36	4.52981e-35
gene110908	0.994098	8.43672	1.2317e-35	5.76177e-35
gene111660	1.00852	8.79129	1.23748e-35	5.78394e-35
gene113276	0.972301	8.04119	1.48394e-35	6.93005e-35
gene108060	1.05004	7.04056	1.65443e-35	7.71596e-35
gene107416	-1.21952	4.03339	1.65501e-35	7.71596e-35
gene103021	-1.62582	3.34807	1.68141e-35	7.83245e-35
gene102895	1.08628	7.40248	1.81868e-35	8.46478e-35
gene107700	1.20892	4.94551	2.70606e-35	1.25844e-34
gene113486	0.976242	5.62281	2.72678e-35	1.26701e-34
gene102899	1.01972	7.95726	2.94512e-35	1.36733e-34
gene108538	-1.05956	5.98401	3.31032e-35	1.53559e-34
gene104266	1.11717	6.91349	4.33153e-35	2.00763e-34
gene110628	-0.885472	6.33475	4.39371e-35	2.03475e-34
gene108004	-0.868427	6.30034	5.95509e-35	2.75553e-34
gene103417	1.2709	4.53301	6.85287e-35	3.16831e-34
gene104970	0.987253	7.85016	7.23412e-35	3.34179e-34
gene107250	-1.25584	8.10425	9.35955e-35	4.32003e-34
gene109032	0.945046	6.48874	1.00542e-34	4.63678e-34
gene108772	0.942109	6.19337	1.21829e-34	5.61383e-34
gene106938	-1.33658	5.35057	1.22424e-34	5.63661e-34
gene111654	1.01147	8.84131	1.41255e-34	6.49819e-34
gene104248	1.19548	4.9105	1.46056e-34	6.71351e-34
gene107260	-1.08268	5.50491	1.86291e-34	8.55583e-34
gene110350	2.08361	5.43258	2.25814e-34	1.03624e-33
gene104814	-1.28653	4.53874	2.36449e-34	1.08415e-33
gene103305	1.73565	3.58227	2.603e-34	1.19252e-33
gene106502	-1.35139	5.87531	2.70881e-34	1.23998e-33
gene104822	-1.20011	4.58229	3.06323e-34	1.40105e-33
gene111826	1.03789	8.02832	3.21141e-34	1.46762e-33
gene109391	-1.54916	3.47637	3.58892e-34	1.63879e-33
gene105634	-0.99828	5.75153	3.66375e-34	1.67159e-33
gene102927	1.10415	5.2035	3.80687e-34	1.73546e-33
gene112080	1.24931	5.70477	4.05994e-34	1.8493e-33
gene113856	-1.14934	5.04398	4.4247e-34	2.0138e-33
gene107632	-5.22138	7.10001	5.0605e-34	2.30128e-33
gene108216	-1.99913	2.39087	5.68227e-34	2.58192e-33
gene113134	-1.36258	3.9215	5.96606e-34	2.70865e-33
gene106404	-1.03795	9.21485	6.5591e-34	2.97546e-33
gene105366	1.18231	4.89747	6.65607e-34	3.01698e-33
gene113062	-1.98746	4.27421	7.20479e-34	3.26303e-33
gene112434	-0.919999	5.81778	7.80498e-34	3.53198e-33
gene105830	1.26023	4.39151	8.28996e-34	3.74839e-33
gene112556	0.934113	6.69831	8.36522e-34	3.77934e-33
gene108430	1.63445	6.15792	8.49769e-34	3.83606e-33
gene105380	1.09188	5.51081	8.56836e-34	3.86482e-33
gene108822	-1.24813	9.41708	9.83968e-34	4.43465e-33
gene104031	1.6191	5.0619	1.02299e-33	4.60675e-33
gene110201	-1.10859	8.43167	1.69221e-33	7.61425e-33
gene104838	-1.01771	6.49403	1.72544e-33	7.75751e-33
gene103457	0.920758	6.53501	1.76304e-33	7.92012e-33
gene110640	2.09311	3.73491	1.82172e-33	8.17711e-33
gene108154	1.16825	8.70198	1.95594e-33	8.77248e-33
gene113688	-1.39008	4.00721	2.31356e-33	1.0368e-32
gene108298	1.04588	8.15369	2.35e-33	1.05228e-32
gene109363	-1.22382	4.15367	2.41799e-33	1.08185e-32
gene113674	-1.57167	3.27906	2.45437e-33	1.09725e-32
gene105852	3.9159	1.10601	2.70961e-33	1.21038e-32
gene112778	0.927272	7.32291	2.80132e-33	1.25034e-32
gene104812	-1.35261	4.92741	2.98653e-33	1.33194e-32
gene109473	-2.34046	7.49624	3.11221e-33	1.38687e-32
gene113708	0.93339	7.07335	3.38107e-33	1.50547e-32
gene110039	2.21788	2.9474	3.42674e-33	1.52458e-32
gene112112	0.943667	8.30846	3.91118e-33	1.73872e-32
gene103279	-1.08385	4.64815	4.49525e-33	1.99677e-32
gene112558	1.14326	6.53527	4.75706e-33	2.11137e-32
gene109939	1.09087	5.29066	5.5086e-33	2.44298e-32
gene110498	1.0899	7.10613	5.6129e-33	2.48725e-32
gene108848	-0.956174	5.58128	5.62068e-33	2.48871e-32
gene110752	0.999487	6.34586	5.91188e-33	2.61556e-32
gene113288	0.980905	6.02309	6.28937e-33	2.78035e-32
gene112181	0.946671	8.30555	6.6998e-33	2.95943e-32
gene109769	-0.912533	6.23718	7.64941e-33	3.37621e-32
gene107436	-1.34302	3.82941	7.93357e-33	3.49884e-32
gene110037	2.51928	1.73217	8.1714e-33	3.60087e-32
gene107116	-2.46157	1.54045	8.53078e-33	3.75625e-32
gene104572	1.32649	5.52574	9.12902e-33	4.01648e-32
gene107966	-1.25031	6.91264	1.03134e-32	4.53397e-32
gene111514	-0.911502	5.50644	1.08918e-32	4.78446e-32
gene112179	0.960819	6.86278	1.10699e-32	4.85884e-32
gene110109	1.01996	7.74172	1.11527e-32	4.89133e-32
gene109339	1.66685	5.36053	1.14602e-32	5.02223e-32
gene107842	-0.938305	7.8136	1.37114e-32	6.00399e-32
gene102843	-0.876449	6.10354	1.42668e-32	6.24229e-32
gene302417	-1.14405	13.627	1.60499e-32	7.01695e-32
gene1077079	1.36539	4.90775	1.91715e-32	8.37509e-32
gene107358	-0.924609	5.23131	2.10617e-32	9.19355e-32
gene112928	1.06961	4.92454	2.20898e-32	9.63476e-32
gene104376	-1.88537	3.33231	2.31084e-32	1.00711e-31
gene110570	1.35735	5.70116	2.36396e-32	1.02945e-31
gene105614	-0.949015	5.40686	2.3844e-32	1.03754e-31
gene113974	-1.14549	7.88558	2.38771e-32	1.03817e-31
gene104576	2.36179	2.92943	2.47053e-32	1.07333e-31
gene111280	-1.43707	4.74651	2.67907e-32	1.16303e-31
gene111692	1.21411	6.90151	2.96966e-32	1.28817e-31
gene108006	-1.29249	3.86559	3.31493e-32	1.43682e-31
gene108604	-1.0864	5.03958	4.18552e-32	1.81275e-31
gene106150	1.85022	2.59508	4.20438e-32	1.81949e-31
gene106454	1.36452	5.50741	4.2177e-32	1.82384e-31
gene109765	1.24379	4.02311	4.47543e-32	1.93377e-31
gene113342	-0.868002	5.71271	4.84379e-32	2.09131e-31
gene104846	1.03921	5.29322	5.08167e-32	2.19231e-31
gene103585	1.14391	5.1624	5.11926e-32	2.20681e-31
gene104934	0.981773	6.89668	6.47607e-32	2.78954e-31
gene109941	1.29679	4.55004	6.52089e-32	2.80666e-31
gene109275	-1.68383	2.68608	6.63101e-32	2.85185e-31
gene111380	1.50782	4.39147	7.33951e-32	3.15411e-31
gene106818	-0.97724	5.15509	9.16255e-32	3.93451e-31
gene109517	0.905356	5.92945	1.15047e-31	4.93643e-31
gene107554	-1.51362	5.54647	1.26165e-31	5.40932e-31
gene105458	-0.992296	4.68257	1.31377e-31	5.6284e-31
gene110670	-0.973035	7.64324	1.36979e-31	5.8639e-31
gene103403	0.886978	5.97916	1.41514e-31	6.05336e-31
gene104282	-1.22474	9.84946	1.66059e-31	7.09781e-31
gene113412	1.14417	5.65593	1.69827e-31	7.25326e-31
gene104902	0.949277	7.28881	2.07649e-31	8.86183e-31
gene111866	-1.17241	5.19773	2.38691e-31	1.01788e-30
gene105496	-1.41369	3.23742	2.57385e-31	1.09675e-30
gene110051	0.922152	5.53059	2.71058e-31	1.15413e-30
gene113496	2.12026	4.38052	2.9248e-31	1.24438e-30
gene107056	-1.45504	3.35724	2.94315e-31	1.25124e-30
gene107944	1.79675	3.16757	3.44821e-31	1.46483e-30
gene110195	-0.989109	5.37375	3.71919e-31	1.57874e-30
gene109173	-1.14048	4.66542	3.73427e-31	1.58392e-30
gene106996	-1.37223	3.84331	3.90711e-31	1.65597e-30
gene102901	1.08574	9.02472	3.94211e-31	1.66953e-30
gene106842	-1.57757	2.72071	4.35489e-31	1.84294e-30
gene111276	-1.25548	7.12368	4.70323e-31	1.98884e-30
gene105354	-1.11798	7.53623	5.24464e-31	2.21609e-30
gene109389	-1.06259	8.02024	5.35934e-31	2.26283e-30
gene111454	-0.912038	7.51106	5.40632e-31	2.28093e-30
gene106804	-1.41984	8.50361	5.85813e-31	2.46967e-30
gene108892	0.909044	6.6486	5.93104e-31	2.49851e-30
gene109743	-1.15605	4.70267	6.42951e-31	2.70644e-30
gene104460	-1.00788	5.68222	6.98178e-31	2.93669e-30
gene108986	0.93467	5.72757	7.78272e-31	3.2711e-30
gene109229	-0.869137	6.20084	8.76904e-31	3.68287e-30
gene107928	-1.25981	3.62758	8.8972e-31	3.73386e-30
gene111000	-1.04202	5.19785	9.27974e-31	3.89146e-30
gene107658	-1.99174	2.5152	9.42898e-31	3.95106e-30
gene110300	1.64726	3.32739	1.03361e-30	4.32788e-30
gene112344	0.946849	7.76066	1.08721e-30	4.5489e-30
gene108636	-0.885509	6.28107	1.18254e-30	4.94404e-30
gene106432	-1.21588	4.08178	1.3291e-30	5.55259e-30
gene111046	1.22783	4.51855	1.4923e-30	6.22969e-30
gene111262	1.06357	8.31347	1.51304e-30	6.31154e-30
gene105512	-1.09982	8.51903	1.56923e-30	6.54103e-30
gene109361	-0.991076	7.03331	1.62108e-30	6.75207e-30
gene103409	1.02794	8.35423	1.8919e-30	7.87418e-30
gene113330	0.980995	5.25713	2.17547e-30	9.0476e-30
gene105142	-1.61316	3.34984	2.18759e-30	9.0912e-30
gene104578	2.07089	2.29807	2.31099e-30	9.59684e-30
gene110824	0.894825	6.16594	2.49821e-30	1.03666e-29
gene111726	-0.829671	6.34372	2.93215e-30	1.21581e-29
gene108738	1.35191	8.81511	3.1495e-30	1.30496e-29
gene109801	0.96667	6.22831	4.21964e-30	1.74706e-29
gene108920	-1.81869	2.35542	4.33386e-30	1.79301e-29
gene107230	-1.71382	2.5516	4.54115e-30	1.87635e-29
gene110322	1.22597	4.30025	4.54206e-30	1.87635e-29
gene108198	0.894657	5.35711	4.60614e-30	1.9014e-29
gene110574	1.66901	5.09412	5.19016e-30	2.14089e-29
gene104456	-0.960958	5.27838	5.62318e-30	2.31779e-29
gene110732	-1.03747	5.21583	5.78552e-30	2.38293e-29
gene105870	0.9397	7.43014	6.19962e-30	2.55159e-29
gene106580	-1.43324	3.72555	6.31466e-30	2.59701e-29
gene111822	0.908455	7.07628	6.40733e-30	2.63317e-29
gene105996	0.890333	6.65344	7.19299e-30	2.95386e-29
gene103443	0.943148	8.19703	8.95291e-30	3.67387e-29
gene108834	0.972121	7.44003	1.10033e-29	4.51192e-29
gene112320	0.967515	7.05445	1.1615e-29	4.75925e-29
gene112776	0.87624	6.71911	1.24001e-29	5.07719e-29
gene112974	0.892543	6.3891	1.33687e-29	5.46974e-29
gene106096	1.21559	6.33889	1.36212e-29	5.56895e-29
gene104183	1.93321	2.29738	1.40105e-29	5.72386e-29
gene107144	-1.29345	3.3782	1.72735e-29	7.05176e-29
gene109657	-0.926872	5.81078	1.80457e-29	7.3616e-29
gene110123	0.91026	7.86184	1.94821e-29	7.94172e-29
gene113630	-1.61812	9.29642	2.14706e-29	8.74588e-29
gene105630	-1.04146	7.38053	2.65712e-29	1.08156e-28
gene111940	-1.1207	7.0218	2.67259e-29	1.08706e-28
gene103277	-0.956887	5.1489	2.72626e-29	1.10808e-28
gene109559	-1.69972	4.17858	3.12808e-29	1.27047e-28
gene111664	1.00683	7.66838	3.18496e-29	1.29262e-28
gene113372	0.975565	5.31964	3.24643e-29	1.31661e-28
gene112191	0.954228	11.1376	3.32647e-29	1.34808e-28
gene111154	-2.05171	1.99935	3.43566e-29	1.39132e-28
gene109787	0.875692	5.95405	3.60306e-29	1.45804e-28
gene109411	0.858958	8.22787	4.07138e-29	1.64636e-28
gene108990	1.55353	6.81191	4.48493e-29	1.81227e-28
gene112492	-1.84572	2.12557	4.49558e-29	1.81525e-28
gene109511	-0.931024	6.58815	5.02232e-29	2.02646e-28
gene109691	1.52862	2.96246	6.20925e-29	2.50355e-28
gene111618	-0.881962	5.87671	8.02566e-29	3.23358e-28
gene108862	-1.57183	3.24248	8.30641e-29	3.34427e-28
gene111210	1.7001	3.31891	8.79163e-29	3.53705e-28
gene112014	1.20791	5.01088	8.98794e-29	3.61341e-28
gene111696	1.01888	10.2273	9.14223e-29	3.67278e-28
gene113406	1.67376	3.17691	9.23562e-29	3.70761e-28
gene107232	-1.62189	3.60416	9.3941e-29	3.76851e-28
gene111706	-0.982351	7.37574	9.66852e-29	3.87579e-28
gene107182	-0.991885	4.84776	9.73542e-29	3.89979e-28
gene103299	1.80863	4.52701	9.97254e-29	3.98906e-28
gene102859	1.0773	5.19706	9.97266e-29	3.98906e-28
gene134050	1.02579	8.09024	1.19805e-28	4.78874e-28
gene110222	-0.859492	6.79733	1.28713e-28	5.14111e-28
gene102923	0.921975	7.6904	1.30316e-28	5.2014e-28
gene113754	1.61074	10.0863	1.62916e-28	6.4979e-28
gene108032	-1.02025	12.6489	1.64906e-28	6.57256e-28
gene110033	1.76153	2.7376	1.73836e-28	6.9235e-28
gene104462	-0.907318	7.42358	1.89992e-28	7.5615e-28
gene111638	-0.867406	6.86918	1.98028e-28	7.87569e-28
gene2173183	-0.84253	6.1492	2.07055e-28	8.22879e-28
gene111756	0.895963	6.81376	2.36115e-28	9.37701e-28
gene108406	-1.18183	4.77096	2.55864e-28	1.0154e-27
gene111528	-1.01722	5.80589	2.76368e-28	1.09599e-27
gene108512	-1.00122	6.67174	3.0863e-28	1.22306e-27
gene104712	1.26072	4.28991	3.22786e-28	1.27824e-27
gene113324	0.819626	6.30616	3.30025e-28	1.30598e-27
gene109403	1.37626	3.63555	3.48183e-28	1.37685e-27
gene111978	0.923737	8.25172	3.72288e-28	1.47112e-27
gene112566	0.808683	6.58741	3.88495e-28	1.53407e-27
gene108672	-1.44144	3.04185	3.90305e-28	1.54012e-27
gene108830	-0.964277	6.92337	4.10467e-28	1.61853e-27
gene102897	1.08818	6.9479	4.56173e-28	1.79748e-27
gene134012	0.933879	9.47596	5.13439e-28	2.02169e-27
gene106438	-1.01359	6.26428	5.89671e-28	2.32021e-27
gene109471	-2.19553	10.0427	6.12984e-28	2.41023e-27
gene104764	1.52382	9.0293	6.97096e-28	2.73902e-27
gene104810	-1.14319	4.47632	7.04598e-28	2.76653e-27
gene113842	1.18297	7.57102	7.34774e-28	2.88298e-27
gene111498	-0.967894	5.03474	7.77784e-28	3.04957e-27
gene109921	-1.18325	4.17839	8.34153e-28	3.26828e-27
gene110161	-1.06667	6.02781	9.13989e-28	3.57855e-27
gene110217	-0.898874	6.22013	9.55801e-28	3.73962e-27
gene113526	-1.36544	3.17584	1.02871e-27	4.02206e-27
gene106708	0.918515	6.50489	1.0983e-27	4.2911e-27
gene110354	-0.870803	7.41684	1.1325e-27	4.4216e-27
gene112036	-1.07061	4.65543	1.21519e-27	4.74112e-27
gene302399	2.92475	1.38523	1.39131e-27	5.42444e-27
gene106876	-1.85669	2.63372	1.4799e-27	5.76579e-27
gene107278	-1.15966	9.17779	1.54373e-27	6.01026e-27
gene109433	0.905291	8.20942	1.54613e-27	6.01536e-27
gene107720	-1.52022	3.12117	1.63206e-27	6.34527e-27
gene110346	0.938355	6.19066	1.67951e-27	6.52514e-27
gene107016	-0.999896	4.75323	1.72498e-27	6.69711e-27
gene103583	-0.999999	11.4869	1.80065e-27	6.98602e-27
gene106414	-0.788776	5.80584	1.8599e-27	7.21087e-27
gene113056	-1.32257	5.05764	1.93771e-27	7.50727e-27
gene106290	-1.05467	7.21479	2.25895e-27	8.74573e-27
gene103737	-0.92197	8.91564	2.40286e-27	9.29641e-27
gene104235	-1.61322	2.26871	2.41904e-27	9.35251e-27
gene112554	3.86128	5.61964	2.67471e-27	1.03338e-26
gene106850	-1.0303	4.61258	2.67926e-27	1.03441e-26
gene113058	-1.26033	4.75372	3.10513e-27	1.198e-26
gene106296	-1.5599	3.29615	3.45874e-27	1.3335e-26
gene111576	-0.896478	5.98089	3.61625e-27	1.39326e-26
gene107238	-0.937652	5.06343	3.83023e-27	1.47468e-26
gene108290	-1.18992	4.00738	3.84195e-27	1.47816e-26
gene104159	0.869804	7.43527	4.00974e-27	1.54165e-26
gene110324	0.851577	6.77954	4.04779e-27	1.5552e-26
gene104223	0.844149	5.6408	4.06622e-27	1.5612e-26
gene109593	1.33873	3.08361	4.26848e-27	1.63773e-26
gene111370	0.984065	9.34494	4.94735e-27	1.89688e-26
gene105092	-0.910847	6.57248	5.13743e-27	1.9684e-26
gene108194	-0.917978	4.886	6.57305e-27	2.51672e-26
gene103465	-1.10381	5.08359	6.6572e-27	2.54718e-26
gene109241	-1.02962	6.11507	7.96098e-27	3.04394e-26
gene112724	-1.10854	5.03828	8.11053e-27	3.09898e-26
gene109499	0.941879	7.34171	8.7761e-27	3.35099e-26
gene103449	0.877683	6.12239	8.80077e-27	3.35809e-26
gene104874	0.950374	7.67568	9.85912e-27	3.75934e-26
gene108156	1.10652	8.10353	1.00734e-26	3.83839e-26
gene106208	1.51691	4.08249	1.02495e-26	3.90282e-26
gene102857	-0.994181	4.78972	1.13813e-26	4.33083e-26
gene106002	-0.860822	5.75567	1.35988e-26	5.17109e-26
gene104856	0.832487	6.95259	1.41106e-26	5.36203e-26
gene107670	1.08865	5.4584	1.59261e-26	6.04778e-26
gene113370	-0.803105	6.11946	1.65066e-26	6.26392e-26
gene104692	0.887796	5.95828	1.99039e-26	7.54796e-26
gene109525	-0.927026	5.52824	2.04592e-26	7.75326e-26
gene104640	-1.44701	2.55236	2.09336e-26	7.92761e-26
gene109771	-1.12629	8.84729	2.17467e-26	8.22991e-26
gene109993	0.785711	5.91537	2.39124e-26	9.04337e-26
gene103999	1.83007	2.83337	2.4513e-26	9.26416e-26
gene112990	-0.921323	10.178	2.4813e-26	9.37118e-26
gene106646	-1.30507	3.80195	2.61247e-26	9.85985e-26
gene108510	-0.847714	5.83442	2.68055e-26	1.01099e-25
gene113392	0.876734	6.25028	2.8137e-26	1.06049e-25
gene110902	-1.03559	4.27037	3.39582e-26	1.27902e-25
gene104432	1.30879	3.2165	3.99498e-26	1.50367e-25
gene113610	3.19832	8.26425	4.01623e-26	1.51065e-25
gene106680	-0.821468	6.4184	4.39049e-26	1.6503e-25
gene113908	1.05966	4.56393	4.82794e-26	1.8135e-25
gene106092	0.968602	5.71121	5.13486e-26	1.92748e-25
gene113000	0.797872	6.94035	5.29457e-26	1.98609e-25
gene106732	-1.22467	3.5243	5.44541e-26	2.04129e-25
gene113140	0.896323	5.36709	5.5155e-26	2.06617e-25
gene113376	1.02212	5.24232	5.60666e-26	2.0989e-25
gene113336	0.974837	9.06125	6.11327e-26	2.28701e-25
gene108436	-0.776095	6.111	6.2286e-26	2.32859e-25
gene105778	0.901128	7.83789	6.39809e-26	2.39034e-25
gene104027	1.521	3.07666	6.4325e-26	2.40158e-25
gene111050	0.846662	7.4534	6.60396e-26	2.46394e-25
gene109561	-1.77902	3.75734	6.61429e-26	2.46613e-25
gene107642	1.12239	4.32637	7.02689e-26	2.61821e-25
gene106216	1.50721	4.13921	7.2083e-26	2.684e-25
gene108874	-2.01267	8.23065	7.76471e-26	2.88924e-25
gene106884	-1.56373	3.16477	7.8479e-26	2.91824e-25
gene111556	-1.09869	4.68408	8.46811e-26	3.14676e-25
gene110698	1.24772	3.42156	9.27589e-26	3.44462e-25
gene112760	1.15201	8.64968	1.05625e-25	3.9198e-25
gene112316	0.868946	5.23577	1.0807e-25	4.00785e-25
gene105006	-0.90159	6.10261	1.08546e-25	4.0228e-25
gene105214	1.30461	4.43396	1.10788e-25	4.10316e-25
gene111138	-1.81387	2.04128	1.11086e-25	4.11145e-25
gene104221	0.865128	5.22274	1.30225e-25	4.81658e-25
gene104608	0.867593	5.53351	1.46943e-25	5.43132e-25
gene113282	-0.95387	7.47121	1.88314e-25	6.95584e-25
gene102875	0.825832	7.51261	1.91126e-25	7.05499e-25
gene104426	0.963673	8.55189	2.0815e-25	7.67828e-25
gene112732	0.980731	10.4907	2.30057e-25	8.48075e-25
gene113446	1.14382	5.54616	2.52671e-25	9.30822e-25
gene104938	0.90785	8.63139	2.55829e-25	9.41829e-25
gene106566	-1.58951	4.39593	2.81431e-25	1.0354e-24
gene112286	-1.04535	4.41597	2.8794e-25	1.05864e-24
gene102833	-0.988746	6.55534	3.13216e-25	1.15081e-24
gene107454	-1.22573	3.88118	3.27738e-25	1.20337e-24
gene111092	-1.12391	4.36308	3.40975e-25	1.25114e-24
gene108858	-0.897609	10.0721	4.00463e-25	1.46845e-24
gene110674	1.18258	4.63246	4.77871e-25	1.75114e-24
gene104480	-1.11687	3.78842	4.95469e-25	1.81443e-24
gene107326	-1.03711	4.76185	5.11335e-25	1.8713e-24
gene108386	-0.900435	5.6989	5.84931e-25	2.13922e-24
gene104772	0.875042	7.71549	6.10033e-25	2.22955e-24
gene103301	1.64356	4.48625	6.17712e-25	2.25613e-24
gene111054	-0.797008	7.34371	6.75298e-25	2.46484e-24
gene113570	-1.06864	9.33456	7.747e-25	2.82579e-24
gene107050	-1.99	1.53841	8.21447e-25	2.99434e-24
gene113972	-1.21875	6.28429	8.22317e-25	2.99555e-24
gene106534	-1.37844	2.88742	8.39804e-25	3.05571e-24
gene109325	-0.813563	6.97517	8.39935e-25	3.05571e-24
gene106806	-1.33018	6.63523	8.59489e-25	3.1248e-24
gene104350	-1.95458	1.91453	9.66363e-25	3.51106e-24
gene105044	1.14826	3.81978	1.05459e-24	3.8291e-24
gene113014	0.785291	6.05732	1.0703e-24	3.88359e-24
gene111278	-1.34313	4.62421	1.14019e-24	4.13449e-24
gene108630	1.02281	5.11848	1.23316e-24	4.46868e-24
gene110091	0.895811	8.58909	1.26446e-24	4.57914e-24
gene113290	1.35366	7.24172	1.28173e-24	4.63863e-24
gene113676	1.13729	4.15615	1.46111e-24	5.28437e-24
gene107438	-1.32498	3.22039	1.48593e-24	5.37065e-24
gene112250	0.977433	6.73585	1.58449e-24	5.72314e-24
gene111486	1.02513	6.63757	1.62197e-24	5.85471e-24
gene105280	-1.8368	1.83176	1.63037e-24	5.88122e-24
gene112104	0.89583	5.83653	1.74442e-24	6.28852e-24
gene105788	0.782289	5.97625	1.82193e-24	6.56368e-24
gene106238	-0.954416	4.70379	1.84356e-24	6.6373e-24
gene113532	-0.784905	5.57018	2.0554e-24	7.39519e-24
gene105628	-0.913927	9.33388	2.25498e-24	8.10801e-24
gene110782	0.880692	8.0877	2.27558e-24	8.17677e-24
gene106370	1.67219	2.31033	2.29869e-24	8.25444e-24
gene113214	1.16992	11.5556	2.36593e-24	8.4904e-24
gene107148	-1.66423	2.70723	2.61195e-24	9.36724e-24
gene107446	-1.41208	2.44448	2.63516e-24	9.44437e-24
gene112880	0.851379	9.33852	2.75931e-24	9.88292e-24
gene113418	0.740326	7.34738	3.2655e-24	1.16884e-23
gene109305	1.07526	4.87391	3.26894e-24	1.16932e-23
gene110095	0.957563	6.09758	3.34961e-24	1.1974e-23
gene107686	0.945568	5.25763	3.79588e-24	1.35605e-23
gene103649	1.02259	11.4033	3.83521e-24	1.36923e-23
gene106542	-1.1914	3.67607	3.94926e-24	1.40903e-23
gene103247	-1.03947	5.56946	4.00489e-24	1.42796e-23
gene103611	0.746656	6.2263	4.01544e-24	1.43081e-23
gene108390	-0.891287	4.68361	4.22346e-24	1.50396e-23
gene104370	-0.968127	4.51728	4.33078e-24	1.54119e-23
gene109289	-0.782266	6.20863	4.45304e-24	1.58368e-23
gene104568	1.36271	7.33394	4.6535e-24	1.65391e-23
gene112008	0.884547	5.7156	4.78394e-24	1.69919e-23
gene107662	-1.23273	5.43781	4.87906e-24	1.73186e-23
gene111520	-1.60427	2.96721	5.29159e-24	1.87709e-23
gene112482	0.781956	6.89702	5.62623e-24	1.99452e-23
gene104666	-1.05655	5.60406	5.67755e-24	2.01143e-23
gene111286	0.848706	6.74863	5.91827e-24	2.09538e-23
gene110550	0.817756	5.36726	6.12252e-24	2.16631e-23
gene108286	1.59615	2.79528	6.37777e-24	2.25519e-23
gene103519	-0.988466	9.00546	6.42439e-24	2.27022e-23
gene108890	0.934885	7.5353	7.01461e-24	2.47722e-23
gene113824	0.94031	4.35946	7.08876e-24	2.50181e-23
gene108348	-0.844205	6.25513	7.33911e-24	2.58852e-23
gene109803	0.964177	4.39865	9.4015e-24	3.31382e-23
gene107220	0.832424	5.60654	9.48757e-24	3.34204e-23
gene106940	-1.22578	6.82662	9.75948e-24	3.43563e-23
gene109163	-1.64464	2.64928	1.03216e-23	3.63121e-23
gene102835	-1.2838	3.233	1.07758e-23	3.78861e-23
gene108116	0.920967	5.89609	1.27574e-23	4.48248e-23
gene113314	-0.936899	6.61194	1.43573e-23	5.0414e-23
gene106406	-0.761878	5.82495	1.44302e-23	5.0638e-23
gene103799	-1.12401	3.7999	1.46104e-23	5.1238e-23
gene112390	0.761792	6.82853	1.49284e-23	5.232e-23
gene107496	-1.46677	3.43855	1.57452e-23	5.51479e-23
gene108824	-0.994359	10.1535	1.58396e-23	5.54435e-23
gene106440	-0.864253	9.81799	1.70556e-23	5.96622e-23
gene113736	0.830191	6.70802	1.70835e-23	5.97223e-23
gene104806	-1.04437	4.52533	1.74956e-23	6.11246e-23
gene110268	0.78112	6.3813	1.81685e-23	6.34353e-23
gene106000	-0.786532	5.56061	1.9781e-23	6.90219e-23
gene107888	-0.905211	7.56991	2.05044e-23	7.15012e-23
gene109557	-1.51802	5.13309	2.23049e-23	7.77309e-23
gene113818	1.34924	3.27127	2.35065e-23	8.18668e-23
gene107854	1.48953	3.89132	2.51318e-23	8.74727e-23
gene104650	0.828042	6.50051	2.54151e-23	8.84031e-23
gene111140	-2.07068	1.30341	2.6216e-23	9.11317e-23
gene111368	0.944749	10.8422	2.87046e-23	9.97201e-23
gene110344	0.797979	9.92751	2.89299e-23	1.0044e-22
gene109171	1.09815	7.65214	3.29777e-23	1.14422e-22
gene102831	-1.4545	5.69594	3.3399e-23	1.15811e-22
gene112006	0.946616	5.21564	3.51099e-23	1.21668e-22
gene110260	1.22779	5.16535	3.51536e-23	1.21743e-22
gene104858	0.817965	5.9566	3.75067e-23	1.29811e-22
gene104766	1.30676	9.26807	3.92834e-23	1.35875e-22
gene108628	2.61975	1.83381	4.42781e-23	1.53056e-22
gene104406	-0.980385	14.561	5.35665e-23	1.85048e-22
gene107860	0.768905	6.59665	5.5479e-23	1.91536e-22
gene106738	-2.13259	1.17696	6.30617e-23	2.17578e-22
gene103517	0.750882	6.92019	6.49596e-23	2.23988e-22
gene112872	0.749342	6.81013	9.00944e-23	3.10462e-22
gene108374	1.1196	5.15085	9.75673e-23	3.36005e-22
gene113002	0.888878	6.51603	9.98468e-23	3.43641e-22
gene113660	-1.72767	1.93654	1.05001e-22	3.61158e-22
gene111752	0.798896	8.53839	1.17739e-22	4.04718e-22
gene112318	0.787009	7.67644	1.18137e-22	4.05836e-22
gene109291	-0.750762	5.52477	1.29142e-22	4.43365e-22
gene113608	3.12928	7.93164	1.36178e-22	4.67234e-22
gene113422	0.819588	7.29233	1.41231e-22	4.84271e-22
gene105888	1.84565	4.71479	1.41736e-22	4.85702e-22
gene109393	-0.887203	5.01292	1.466e-22	5.02061e-22
gene106808	-1.34101	8.22106	1.50736e-22	5.15904e-22
gene106910	-1.49613	2.14287	1.53447e-22	5.2486e-22
gene109505	0.883239	8.34599	1.62238e-22	5.54586e-22
gene104820	-0.851027	6.04856	1.70533e-22	5.82584e-22
gene105562	-0.851685	5.42511	1.71488e-22	5.85485e-22
gene109227	-1.201	3.35457	2.06604e-22	7.04943e-22
gene111814	0.780522	6.62176	2.0928e-22	7.13637e-22
gene103505	-0.998281	3.98449	2.10493e-22	7.1733e-22
gene113606	2.8059	7.68192	2.10679e-22	7.17525e-22
gene109060	-0.924381	5.59796	2.35765e-22	8.0247e-22
gene111632	-1.08166	4.57257	2.47701e-22	8.42579e-22
gene108984	0.741129	6.17732	2.4838e-22	8.44371e-22
gene109046	0.902909	6.52444	3.05875e-22	1.03919e-21
gene108588	0.848484	5.54056	3.26769e-22	1.10949e-21
gene106636	-0.982276	4.19738	3.39839e-22	1.15317e-21
gene108026	-0.793758	10.3795	3.46899e-22	1.1764e-21
gene106822	-1.72417	2.1058	3.83188e-22	1.2981e-21
gene108486	1.13733	4.26335	3.83254e-22	1.2981e-21
gene103351	0.867077	4.96865	3.86704e-22	1.30899e-21
gene113136	0.756198	6.99911	4.02601e-22	1.36197e-21
gene106146	-0.722042	5.655	4.09458e-22	1.38432e-21
gene109885	0.803847	8.83866	4.31377e-22	1.45754e-21
gene113650	2.53258	2.08548	4.62362e-22	1.56128e-21
gene105352	-0.787433	7.00114	4.80217e-22	1.62059e-21
gene102861	0.695742	6.15066	4.88022e-22	1.64592e-21
gene106908	-2.04085	1.23304	5.22241e-22	1.76026e-21
gene111744	0.795921	8.19582	5.46246e-22	1.84006e-21
gene113034	0.922136	4.45281	5.58966e-22	1.88176e-21
gene109857	-1.56934	2.00907	5.78618e-22	1.94674e-21
gene103953	0.80727	5.99797	5.80614e-22	1.95227e-21
gene133902	0.784428	7.58546	5.81051e-22	1.95256e-21
gene103845	0.756669	6.39628	6.2026e-22	2.08305e-21
gene105238	-0.931769	4.73963	6.30917e-22	2.11741e-21
gene109140	-0.843157	7.37491	6.31255e-22	2.11741e-21
gene113278	0.9242	4.50854	6.37097e-22	2.13572e-21
gene108104	-0.722162	7.06213	6.46947e-22	2.16743e-21
gene113360	0.830528	9.59276	6.7474e-22	2.25918e-21
gene107468	-1.40784	3.82583	6.92813e-22	2.31829e-21
gene110436	0.769563	5.9738	6.934e-22	2.31886e-21
gene107140	-2.10011	1.61329	7.15512e-22	2.39136e-21
gene107032	0.917839	5.46692	7.48304e-22	2.49945e-21
gene108606	-0.974574	4.08899	7.57048e-22	2.52714e-21
gene105286	-2.02097	1.44366	7.60619e-22	2.53753e-21
gene111616	-0.776252	8.69114	7.63066e-22	2.54416e-21
gene112030	-1.03008	3.94502	7.68739e-22	2.56154e-21
gene109044	0.998955	5.52886	8.19105e-22	2.72773e-21
gene112524	-0.855486	5.32894	8.22176e-22	2.73631e-21
gene109849	-1.06886	4.30371	8.25001e-22	2.74407e-21
gene103275	-0.794074	5.33059	8.6698e-22	2.88197e-21
gene110444	0.753956	7.73214	8.93142e-22	2.96716e-21
gene110189	0.701504	5.90698	9.1734e-22	3.04572e-21
gene107920	1.62831	4.05802	9.70077e-22	3.21889e-21
gene111820	0.761672	8.28693	1.00729e-21	3.34037e-21
gene112213	-1.08845	3.89636	1.12209e-21	3.71792e-21
gene191115	-1.40784	2.5463	1.12248e-21	3.71792e-21
gene105980	-1.11058	4.04747	1.14041e-21	3.77506e-21
gene112888	0.839532	5.79166	1.2164e-21	4.02421e-21
gene106448	-0.709427	5.687	1.24227e-21	4.10733e-21
gene110660	-0.91202	5.2161	1.24832e-21	4.12489e-21
gene106210	1.30764	3.8392	1.25726e-21	4.15194e-21
gene103815	1.58656	2.70271	1.26004e-21	4.15867e-21
gene110828	0.757617	5.62851	1.36172e-21	4.49157e-21
gene112522	-1.26449	2.61368	1.3696e-21	4.51489e-21
gene112266	-1.55812	3.84824	1.51091e-21	4.97775e-21
gene104065	0.745178	6.40764	1.54481e-21	5.0864e-21
gene104756	1.24835	9.63213	1.55773e-21	5.1259e-21
gene110352	-0.804652	5.5037	1.63041e-21	5.3619e-21
gene112578	0.833396	7.90661	1.64191e-21	5.39652e-21
gene106726	-0.854121	5.26726	1.64583e-21	5.40619e-21
gene112612	1.2605	3.71423	1.72253e-21	5.65479e-21
gene103897	1.09895	8.76114	1.8355e-21	6.02211e-21
gene107254	-0.788037	6.24422	1.91579e-21	6.28181e-21
gene112898	0.752385	8.4091	2.13745e-21	7.00447e-21
gene106068	-1.08789	3.48423	2.15269e-21	7.05024e-21
gene102829	-1.21416	3.87719	2.19519e-21	7.18518e-21
gene108508	-0.738136	6.639	2.34445e-21	7.66922e-21
gene110766	1.06051	5.49894	2.69018e-21	8.79499e-21
gene104101	-1.49992	3.76789	2.77634e-21	9.07135e-21
gene112900	1.29592	11.5041	2.89786e-21	9.4628e-21
gene112382	-1.13787	7.47352	2.94387e-21	9.60741e-21
gene109723	-0.752459	6.67682	2.95213e-21	9.62868e-21
gene104996	-0.997671	4.232	3.18236e-21	1.03735e-20
gene103447	-0.94319	5.94038	3.26355e-21	1.06319e-20
gene104354	-1.3788	3.43609	3.31197e-21	1.07833e-20
gene113426	1.13311	5.02326	3.34567e-21	1.08867e-20
gene109555	1.68054	2.51939	3.36184e-21	1.09329e-20
gene112252	0.770255	8.92914	3.48895e-21	1.13396e-20
gene103483	0.723102	7.90494	3.53999e-21	1.14987e-20
gene113038	1.48196	3.52278	4.0592e-21	1.31775e-20
gene112018	0.867119	4.44119	4.73945e-21	1.53769e-20
gene111534	1.03655	9.40728	5.20271e-21	1.68701e-20
gene105278	-1.8531	1.7668	5.45074e-21	1.7664e-20
gene109661	-1.32788	2.95192	5.58139e-21	1.80768e-20
gene108776	-0.797199	6.98589	5.9663e-21	1.93121e-20
gene110474	0.79515	7.23292	6.28102e-21	2.0319e-20
gene105520	-0.687095	7.21792	6.40435e-21	2.07059e-20
gene103365	-0.718194	6.55744	6.73892e-21	2.17749e-20
gene112064	-0.891193	6.6096	7.21848e-21	2.33109e-20
gene108764	-0.863839	4.61942	7.23916e-21	2.33641e-20
gene112197	-1.5845	3.89355	7.63706e-21	2.4634e-20
gene106464	-0.752768	6.0008	7.94324e-21	2.56067e-20
gene112223	0.742388	8.31171	8.00798e-21	2.58004e-20
gene110512	-0.791323	5.90223	8.38354e-21	2.69849e-20
gene110914	0.755346	6.87382	8.38535e-21	2.69849e-20
gene106484	-1.73489	8.29116	8.72544e-21	2.8063e-20
gene106688	-1.68802	1.67447	9.31527e-21	2.99427e-20
gene103547	0.744916	6.76307	9.32559e-21	2.99585e-20
gene106206	1.82427	1.76753	9.59478e-21	3.08055e-20
gene110101	0.90918	7.96059	1.03666e-20	3.32641e-20
gene104852	-0.765846	5.81791	1.06535e-20	3.41652e-20
gene108530	0.785132	8.50736	1.08921e-20	3.49102e-20
gene107540	-0.748915	5.37276	1.15642e-20	3.7043e-20
gene113186	1.21381	2.66401	1.24593e-20	3.98869e-20
gene112360	1.00154	9.02378	1.25304e-20	4.00914e-20
gene113348	0.717116	8.09188	1.25836e-20	4.02386e-20
gene104225	-1.14332	3.32909	1.2895e-20	4.12106e-20
gene104278	0.722316	8.32143	1.44896e-20	4.62798e-20
gene111828	-0.851411	8.43327	1.45446e-20	4.6429e-20
gene105576	-1.45613	3.01697	1.51005e-20	4.81756e-20
gene112648	2.15162	1.57924	1.53e-20	4.87842e-20
gene104944	0.724112	5.90786	1.60996e-20	5.13042e-20
gene107838	-0.764548	6.58532	1.65143e-20	5.25955e-20
gene103515	0.696759	6.13129	1.85113e-20	5.89217e-20
gene111934	0.742926	7.29735	1.98795e-20	6.32406e-20
gene106568	-1.39813	4.61604	2.19201e-20	6.96921e-20
gene109052	0.710873	5.80905	2.29321e-20	7.28678e-20
gene104768	1.17303	7.15876	2.32103e-20	7.36895e-20
gene108948	-0.887681	5.21482	2.32172e-20	7.36895e-20
gene111400	0.695263	5.85918	2.46126e-20	7.80736e-20
gene113678	1.57799	2.77535	2.54287e-20	8.06162e-20
gene109267	-1.00389	6.86541	2.62217e-20	8.30827e-20
gene104538	0.696891	7.17314	2.96176e-20	9.37889e-20
gene106740	-1.97969	1.20674	2.97831e-20	9.42594e-20
gene112110	0.70247	7.67772	3.10111e-20	9.809e-20
gene111766	0.889184	9.11552	3.36605e-20	1.06409e-19
gene110438	0.733632	8.08529	3.46826e-20	1.09578e-19
gene134054	-1.49107	1.93654	3.59764e-20	1.13601e-19
gene107094	-1.85248	1.2452	4.01936e-20	1.26845e-19
gene109877	0.754224	11.1127	4.20357e-20	1.32583e-19
gene104778	0.791362	5.22762	4.4453e-20	1.40128e-19
gene106670	-1.07526	3.90653	4.47682e-20	1.41042e-19
gene106080	0.846293	6.38572	4.48767e-20	1.41303e-19
gene111964	0.695492	7.01569	4.61848e-20	1.45339e-19
gene105544	-1.1497	3.28661	4.65281e-20	1.46337e-19
gene107246	-0.791208	5.95157	4.73308e-20	1.48777e-19
gene104762	1.40412	9.51628	4.89732e-20	1.53852e-19
gene105514	-0.884659	4.69381	4.98675e-20	1.56573e-19
gene109215	0.760575	7.43295	5.38684e-20	1.6904e-19
gene103609	0.744758	6.46741	5.50507e-20	1.72652e-19
gene106026	-0.973292	4.30479	5.59016e-20	1.75221e-19
gene108992	-2.21992	0.851812	5.76299e-20	1.80537e-19
gene112800	0.72395	5.41217	5.80457e-20	1.81737e-19
gene107444	0.810764	5.15876	5.90349e-20	1.8473e-19
gene106560	-0.721352	5.77939	6.12572e-20	1.91576e-19
gene112082	0.725431	6.09917	6.24454e-20	1.95181e-19
gene110734	-1.05945	4.4716	6.33632e-20	1.97939e-19
gene104554	0.677598	6.62908	6.69619e-20	2.09063e-19
gene111630	-0.781415	5.86401	6.92351e-20	2.16038e-19
gene104179	0.91172	7.01382	7.05188e-20	2.1992e-19
gene113004	0.797305	6.26374	7.47362e-20	2.32942e-19
gene104968	0.716435	7.57416	8.18869e-20	2.55086e-19
gene111558	0.670983	6.30385	8.27922e-20	2.57762e-19
gene105018	-0.868476	4.9132	9.5528e-20	2.97246e-19
gene103657	-0.750562	7.95162	9.59145e-20	2.98281e-19
gene106838	-0.941584	3.96398	9.99173e-20	3.10555e-19
gene111690	-0.683205	7.78409	1.06129e-19	3.29676e-19
gene110992	-0.929617	4.13562	1.06857e-19	3.31753e-19
gene103361	-0.741983	6.15128	1.11982e-19	3.4747e-19
gene113596	3.17175	6.57753	1.12897e-19	3.50112e-19
gene104832	-0.715997	5.90718	1.1332e-19	3.51229e-19
gene2173180	0.864062	6.32735	1.15474e-19	3.57704e-19
gene104788	0.740821	6.83279	1.17462e-19	3.63661e-19
gene109169	-0.75959	5.24357	1.2564e-19	3.88761e-19
gene113784	-0.829642	6.63729	1.28874e-19	3.98548e-19
gene112972	0.736734	8.78282	1.30654e-19	4.03827e-19
gene112790	0.717038	7.485	1.31725e-19	4.06909e-19
gene112460	-1.01346	3.97486	1.38216e-19	4.26724e-19
gene104203	-0.992231	4.2135	1.42772e-19	4.40543e-19
gene106590	-2.61944	0.363357	1.49244e-19	4.6026e-19
gene112856	-0.736336	6.35858	1.53747e-19	4.73882e-19
gene109034	0.738563	11.0098	1.54882e-19	4.77116e-19
gene112183	0.710877	6.06126	1.56788e-19	4.8272e-19
gene113734	0.696195	7.06472	1.61398e-19	4.96636e-19
gene104940	0.734056	8.2893	1.70445e-19	5.24183e-19
gene108012	0.678385	7.57632	1.75494e-19	5.39414e-19
gene105970	1.70473	2.57662	1.78424e-19	5.48114e-19
gene104828	0.714492	7.19481	1.81708e-19	5.57894e-19
gene103233	-0.89759	5.22052	1.91819e-19	5.88612e-19
gene104217	1.08193	3.50563	2.06401e-19	6.33008e-19
gene110568	1.05542	5.16229	2.12932e-19	6.52677e-19
gene108838	0.695755	6.92426	2.1526e-19	6.59448e-19
gene112310	0.725434	6.88093	2.18435e-19	6.68806e-19
gene103227	0.75889	5.0456	2.25876e-19	6.91208e-19
gene109177	1.23898	4.70723	2.40298e-19	7.34936e-19
gene108312	-1.22761	2.95142	2.48058e-19	7.58251e-19
gene111786	-0.725872	7.9596	2.58567e-19	7.89938e-19
gene104704	-0.694131	7.71873	2.71931e-19	8.3031e-19
gene103889	-0.920046	4.94603	2.89637e-19	8.83886e-19
gene112868	0.749483	5.90749	2.94212e-19	8.97353e-19
gene112902	1.1507	10.5017	3.05815e-19	9.32232e-19
gene104482	-1.09352	3.26204	3.19844e-19	9.74462e-19
gene112149	-1.38072	2.56686	3.28236e-19	9.99479e-19
gene108584	-0.718959	5.58312	3.43993e-19	1.04689e-18
gene111410	0.727839	5.71106	3.74973e-19	1.14054e-18
gene109082	0.828993	4.59467	3.80893e-19	1.15792e-18
gene103633	0.861356	5.98795	3.87087e-19	1.1761e-18
gene103095	0.78497	5.10501	3.88965e-19	1.18116e-18
gene113840	0.659985	5.89044	4.05721e-19	1.23137e-18
gene113488	0.728564	7.3256	4.36242e-19	1.32327e-18
gene103485	0.732963	7.37013	4.58564e-19	1.39022e-18
gene106364	1.00818	6.40956	4.85556e-19	1.47125e-18
gene108566	0.743359	6.44631	5.02424e-19	1.52153e-18
gene108200	0.676334	7.7557	5.06668e-19	1.53355e-18
gene112270	-0.654294	5.62502	5.11375e-19	1.54695e-18
gene106978	-1.40257	2.06139	5.13777e-19	1.55337e-18
gene111328	0.817023	8.73106	5.37447e-19	1.62405e-18
gene105088	-0.720566	5.43006	5.43371e-19	1.64106e-18
gene109377	4.39734	4.70664	5.46142e-19	1.64853e-18
gene108852	-0.741125	7.16057	5.49342e-19	1.65729e-18
gene108094	0.732705	7.69675	5.76697e-19	1.73887e-18
gene111052	0.85401	4.38963	6.2146e-19	1.87282e-18
gene111760	0.702189	8.125	6.25595e-19	1.88426e-18
gene104053	-0.724752	7.05949	6.40741e-19	1.92883e-18
gene108916	-1.36516	2.32498	6.70914e-19	2.01856e-18
gene113770	0.693515	8.35201	6.91048e-19	2.07801e-18
gene105120	-1.30493	4.04058	6.9887e-19	2.1004e-18
gene105384	-0.701951	6.75839	7.08194e-19	2.12726e-18
gene103551	-0.655857	6.70713	7.12529e-19	2.13913e-18
gene111982	1.15384	9.32455	7.13447e-19	2.14073e-18
gene108880	-0.689369	7.04083	7.44677e-19	2.23323e-18
gene106230	-0.730222	5.2064	7.6914e-19	2.30534e-18
gene110830	0.681291	6.82198	7.94856e-19	2.38114e-18
gene110103	-0.769741	5.59209	8.34453e-19	2.49841e-18
gene103181	-1.13223	3.63228	8.54073e-19	2.55577e-18
gene102967	-1.04517	3.99243	8.70345e-19	2.60306e-18
gene104167	-1.24682	2.60611	9.052e-19	2.70585e-18
gene111466	0.696653	8.08382	9.09348e-19	2.71678e-18
gene104612	0.791789	5.0665	9.45952e-19	2.82462e-18
gene103719	0.95232	4.19991	9.68994e-19	2.89187e-18
gene107064	-1.8414	1.31984	1.02402e-18	3.05443e-18
gene113600	-0.815787	6.98625	1.06311e-18	3.16933e-18
gene104296	-0.669451	6.66172	1.1267e-18	3.35711e-18
gene108102	-0.652713	6.22584	1.14186e-18	3.40045e-18
gene102979	-0.758353	5.30531	1.21121e-18	3.60504e-18
gene102787	1.08103	4.72335	1.21418e-18	3.61195e-18
gene103873	-0.794441	4.83994	1.22722e-18	3.64876e-18
gene112938	0.787274	7.40079	1.27064e-18	3.77585e-18
gene108162	-1.65108	2.04574	1.2949e-18	3.84589e-18
gene111768	0.867991	8.51272	1.29646e-18	3.84846e-18
gene109245	-1.00412	4.0853	1.29771e-18	3.85011e-18
gene108342	2.00455	7.39641	1.3115e-18	3.88895e-18
gene111642	-0.719215	7.74157	1.36529e-18	4.04629e-18
gene110276	0.895579	9.29793	1.43498e-18	4.25055e-18
gene108408	-0.972791	4.25442	1.51467e-18	4.48421e-18
gene107038	2.09977	1.38223	1.52286e-18	4.50603e-18
gene112722	0.804973	7.44971	1.54364e-18	4.56509e-18
gene111916	-0.654514	7.68917	1.55536e-18	4.59731e-18
gene109385	-0.929322	4.09004	1.59299e-18	4.70603e-18
gene103921	0.682055	5.49966	1.63172e-18	4.81787e-18
gene113928	0.93992	6.07575	1.77561e-18	5.23993e-18
gene104181	0.730552	6.321	1.96754e-18	5.80326e-18
gene112260	0.661353	7.38971	1.99518e-18	5.88164e-18
gene106736	-1.14881	2.7521	2.04154e-18	6.01513e-18
gene109799	0.921865	4.19331	2.05063e-18	6.0387e-18
gene113868	0.665688	7.08291	2.19859e-18	6.47096e-18
gene111480	0.810032	5.28907	2.31582e-18	6.81239e-18
gene111406	0.73254	7.88838	2.32101e-18	6.82405e-18
gene104898	-0.791525	4.28723	2.45441e-18	7.21242e-18
gene106974	-1.02406	3.58846	2.65046e-18	7.78442e-18
gene113166	0.668181	6.60908	2.72146e-18	7.98871e-18
gene108594	-0.776532	5.04488	2.73226e-18	8.01616e-18
gene107244	-0.735424	7.63432	3.35972e-18	9.85185e-18
gene113808	0.873705	4.91897	3.49961e-18	1.02567e-17
gene113594	2.88141	7.46406	3.60015e-18	1.05458e-17
gene109551	1.09396	3.73294	3.63734e-18	1.06491e-17
gene112604	-0.864423	4.49945	3.66202e-18	1.07157e-17
gene105790	1.04588	3.55114	3.68418e-18	1.07748e-17
gene105156	-1.17608	3.55188	3.74389e-18	1.09437e-17
gene112936	-0.894241	6.11691	3.79037e-18	1.10737e-17
gene113544	0.72032	6.78271	3.80957e-18	1.11239e-17
gene109329	3.02943	4.29599	3.81992e-18	1.11483e-17
gene110832	0.751492	6.84326	4.00096e-18	1.16705e-17
gene110602	-0.757646	5.96204	4.05967e-18	1.18356e-17
gene302411	1.09754	5.5048	4.0673e-18	1.18516e-17
gene113602	0.930156	7.91166	4.18332e-18	1.21832e-17
gene110392	-0.768159	6.196	4.51273e-18	1.31357e-17
gene104760	1.43517	9.3203	4.68445e-18	1.36284e-17
gene106136	-0.792426	5.64717	4.78817e-18	1.39228e-17
gene112728	0.680045	7.86873	5.09734e-18	1.48141e-17
gene109985	-0.694183	5.76763	5.20604e-18	1.5122e-17
gene103579	-0.709299	7.94161	5.94998e-18	1.72739e-17
gene113378	0.710896	7.62376	6.2296e-18	1.80763e-17
gene111304	0.753147	8.44171	6.26158e-18	1.81596e-17
gene111458	0.730149	8.2527	6.28787e-18	1.82263e-17
gene134058	-0.683154	6.89967	6.3562e-18	1.84147e-17
gene107836	-0.784355	6.63688	6.74209e-18	1.95225e-17
gene103901	0.784781	5.4424	6.8189e-18	1.97339e-17
gene113876	-0.790705	7.3906	6.8222e-18	1.97339e-17
gene102853	-0.827813	5.65945	6.87666e-18	1.9881e-17
gene107066	-1.88949	1.35617	7.40104e-18	2.13859e-17
gene105102	-0.851619	4.51266	7.42242e-18	2.14365e-17
gene106564	-1.63168	2.55898	7.54667e-18	2.17841e-17
gene104474	0.67799	5.65163	7.60852e-18	2.19511e-17
gene110724	-0.991975	6.0906	8.4571e-18	2.43867e-17
gene106512	-0.774522	4.68962	8.55322e-18	2.4651e-17
gene111968	0.697436	7.19865	9.13476e-18	2.63134e-17
gene107126	-1.45926	2.12331	9.27387e-18	2.67003e-17
gene110127	0.676827	8.06745	9.78232e-18	2.81495e-17
gene111434	-2.73768	0.227725	1.01793e-17	2.92767e-17
gene111294	0.715024	10.3548	1.11798e-17	3.21375e-17
gene108322	-1.28689	2.6374	1.14703e-17	3.29555e-17
gene108846	-0.756992	4.84794	1.15981e-17	3.33054e-17
gene113628	-1.21512	7.53766	1.22656e-17	3.52042e-17
gene107542	-0.864018	7.77691	1.26335e-17	3.62412e-17
gene107214	-1.37371	2.04857	1.35136e-17	3.87461e-17
gene104758	1.30333	9.30978	1.37913e-17	3.95218e-17
gene104932	0.754559	6.6952	1.38559e-17	3.96864e-17
gene110294	0.629459	5.64358	1.40159e-17	4.01241e-17
gene107870	-1.03189	3.50061	1.5132e-17	4.32966e-17
gene107718	-1.23566	2.72562	1.51487e-17	4.33221e-17
gene108684	-0.650893	7.55751	1.5204e-17	4.3458e-17
gene110776	0.798521	7.42194	1.52334e-17	4.35194e-17
gene110125	0.684653	8.92217	1.52654e-17	4.35885e-17
gene104284	0.727187	8.51238	1.59239e-17	4.54453e-17
gene109327	0.744984	9.8485	1.61716e-17	4.61057e-17
gene107362	1.12826	3.31812	1.61719e-17	4.61057e-17
gene106084	1.09619	7.20635	1.7018e-17	4.84929e-17
gene105438	-0.944776	5.39858	1.76015e-17	5.013e-17
gene106570	-1.40467	4.68786	1.83083e-17	5.21162e-17
gene112350	0.751403	10.1134	1.86992e-17	5.32017e-17
gene112207	0.79551	4.2504	1.90731e-17	5.42376e-17
gene111704	0.888662	10.4014	1.95017e-17	5.5428e-17
gene110157	-0.942484	6.89158	2.00322e-17	5.69065e-17
gene109491	0.954895	8.55922	2.02512e-17	5.74994e-17
gene105378	0.722074	5.44266	2.1222e-17	6.0225e-17
gene110131	0.758841	11.527	2.27075e-17	6.44076e-17
gene107228	-1.00015	3.29149	2.32499e-17	6.59123e-17
gene105010	-0.801064	5.07211	2.39286e-17	6.78018e-17
gene106878	-0.645883	6.39708	2.41223e-17	6.83158e-17
gene103337	-0.809565	10.0071	2.43534e-17	6.89349e-17
gene103571	-0.962071	3.52161	2.75032e-17	7.78113e-17
gene106942	-0.699351	6.57649	2.90934e-17	8.22683e-17
gene110119	0.638097	7.5678	2.9282e-17	8.27594e-17
gene112143	-1.19058	2.64844	2.95536e-17	8.34844e-17
gene112918	1.59743	2.80536	3.41788e-17	9.65008e-17
gene110536	-0.68242	6.87047	3.52764e-17	9.95492e-17
gene111040	-0.907331	4.36063	3.60934e-17	1.01803e-16
gene109405	1.34641	2.49011	3.74369e-17	1.05539e-16
gene108172	1.25462	2.79285	3.8224e-17	1.07703e-16
gene113968	-0.926513	5.58275	4.23044e-17	1.19139e-16
gene105058	-0.76523	4.35009	4.33907e-17	1.22137e-16
gene113440	0.626947	5.99179	4.41969e-17	1.24343e-16
gene103581	0.926589	7.19149	4.43671e-17	1.24759e-16
gene103115	1.32759	3.10198	4.68434e-17	1.31655e-16
gene134034	0.639119	6.53014	5.50777e-17	1.5472e-16
gene107912	0.84655	7.61013	5.65882e-17	1.58882e-16
gene109613	0.852228	9.25395	5.69099e-17	1.59705e-16
gene105132	-1.0004	3.88836	6.09273e-17	1.70892e-16
gene113612	3.46651	9.61069	6.27153e-17	1.75818e-16
gene134024	0.681076	6.55661	6.36877e-17	1.78454e-16
gene107184	2.09441	1.44722	6.39586e-17	1.79123e-16
gene103487	0.623675	7.2762	6.72902e-17	1.88358e-16
gene106474	0.652776	8.00614	6.98192e-17	1.95339e-16
gene110308	0.777286	8.51339	7.05845e-17	1.9738e-16
gene112195	0.713724	8.10523	7.87625e-17	2.20138e-16
gene109883	0.981569	3.62174	8.15209e-17	2.27733e-16
gene104670	-0.81121	4.3492	8.23808e-17	2.30019e-16
gene103927	0.718349	8.95316	8.34342e-17	2.32844e-16
gene113470	0.774638	6.70863	8.42556e-17	2.35018e-16
gene103267	1.48805	9.35688	8.56768e-17	2.38862e-16
gene112074	0.886515	4.25512	8.81927e-17	2.45752e-16
gene103045	-0.651367	6.00655	9.04134e-17	2.51814e-16
gene109209	-0.66233	5.87417	9.33686e-17	2.59914e-16
gene106812	-0.618888	6.65463	9.34914e-17	2.60125e-16
gene104362	-1.40259	2.03652	9.4662e-17	2.6325e-16
gene109545	1.00096	5.60017	9.8459e-17	2.73673e-16
gene109665	0.884098	5.0194	9.92183e-17	2.75645e-16
gene109751	0.608094	6.54159	1.01576e-16	2.82054e-16
gene107316	-1.56967	1.83724	1.04022e-16	2.88701e-16
[truncated: 3,549 more rows]

## Sheet: DEG_LB7_versus_Mix_FC2_FDR5.txt
geneID	gene Name	logFC	logCPM	PValue	FDR
gene102939	PA0103	-4.11703	5.72291	0	0
gene102945	coxA	-3.69861	5.83295	0	0
gene103679	PA0471	-4.67717	5.14485	0	0
gene103773	nirM	5.11863	7.8073	0	0
gene103775	nirS	5.25328	10.7701	0	0
gene103787	PA0525	5.32984	6.73591	0	0
gene103789	PA0526	3.55297	7.14638	0	0
gene104093	hemO	-7.25328	7.55614	0	0
gene104163	toxR	-3.85521	5.50086	0	0
gene104596	PA0918	4.29928	5.87744	0	0
gene104624	pirA	-4.13211	5.41554	0	0
gene105064	toxA	-4.3637	5.98244	0	0
gene105124	oprH	7.4863	12.0413	0	0
gene105126	phoP	4.40306	9.48442	0	0
gene105128	phoQ	4.17231	7.81107	0	0
gene105258	aprX	-5.56617	10.6646	0	0
gene105260	aprD	-5.28989	8.48512	0	0
gene105266	aprA	-6.97428	11.9287	0	0
gene105370	PA1301	-4.97851	6.28369	0	0
gene105454	PA1343	4.8057	5.41356	0	0
gene106522	lasA	-5.50851	10.7787	0	0
gene106786	bdhA	-4.83838	7.32096	0	0
gene106788	PA2004	-5.17078	5.93789	0	0
gene106846	PA2033	-6.63313	7.89714	0	0
gene106848	PA2034	-6.95109	6.45657	0	0
gene107380	chiC	-5.10705	7.47408	0	0
gene107510	PA2365	-3.70831	6.78098	0	0
gene107514	PA2367	-5.29989	6.1387	0	0
gene107522	PA2371	-5.18835	6.45336	0	0
gene107534	PA2377	-5.45155	5.95612	0	0
gene107546	PA2383	-3.32344	6.07961	0	0
gene107548	PA2384	-9.57583	8.29976	0	0
gene107550	pvdQ	-9.77923	8.89115	0	0
gene107552	pvdA	-9.97531	11.3649	0	0
gene107558	pvdR	-5.24292	7.31996	0	0
gene107560	pvdT	-5.74053	7.01116	0	0
gene107562	opmQ	-6.75437	6.74087	0	0
gene107564	pvdP	-7.00974	8.69643	0	0
gene107566	PA2393	-9.66829	8.80078	0	0
gene107568	pvdN	-9.28508	8.47516	0	0
gene107570	pvdO	-8.93812	8.47086	0	0
gene107572	pvdF	-7.20002	9.46416	0	0
gene107574	pvdE	-9.65689	8.61704	0	0
gene107576	fpvA	-8.07826	9.80487	0	0
gene107578	pvdD	-7.20758	10.9054	0	0
gene107580	pvdJ	-7.33122	10.8434	0	0
gene107582	PA2402	-7.81615	11.7833	0	0
gene107584	PA2403	-6.52582	7.81777	0	0
gene107586	PA2404	-6.66782	6.696	0	0
gene107588	PA2405	-6.92593	6.32281	0	0
gene107590	PA2406	-6.86287	5.65884	0	0
gene107592	PA2407	-6.83715	7.05824	0	0
gene107594	PA2408	-7.20241	6.17951	0	0
gene107596	PA2409	-6.26116	6.00362	0	0
gene107598	PA2410	-5.81891	7.32771	0	0
gene107600	PA2411	-9.84502	8.91392	0	0
gene107602	PA2412	-9.63414	7.84429	0	0
gene107604	pvdH	-9.00378	9.67474	0	0
gene107626	pvdL	-9.4102	11.7949	0	0
gene107628	pvdG	-9.11012	7.37594	0	0
gene107630	pvdS	-9.10536	7.31739	0	0
gene107680	PA2451	-5.97258	6.87575	0	0
gene107682	PA2452	-6.21454	6.30312	0	0
gene107710	foxA	-5.97583	6.29062	0	0
gene107840	PA2531	-7.44785	7.41075	0	0
gene108520	lipA	-6.17032	7.43968	0	0
gene108674	PA2939	-5.65706	9.51041	0	0
gene109633	hasAp	-8.23367	8.82007	0	0
gene109635	hasR	-5.95328	5.83207	0	0
gene109879	bfd	-5.99399	6.59534	0	0
gene109881	bfrB	5.18013	9.05506	0	0
gene109923	arnB	5.1137	6.57525	0	0
gene109927	arnA	5.34698	7.49837	0	0
gene109931	arnT	5.18358	5.77862	0	0
gene109955	PA3568	-5.40151	6.42952	0	0
gene109957	mmsB	-6.37409	6.51098	0	0
gene109959	mmsA	-6.17688	8.30072	0	0
gene110666	PA3923	-5.37087	9.102	0	0
gene110668	PA3924	-4.14416	6.94874	0	0
gene111082	PA4131	6.37686	9.37588	0	0
gene111084	PA4132	4.7408	9.55476	0	0
gene111086	PA4133	6.15023	8.91872	0	0
gene111116	PA4148	-7.67129	5.13135	0	0
gene111118	PA4149	-6.95662	4.32181	0	0
gene111120	PA4150	-6.00353	5.75903	0	0
gene111122	acoB	-5.97075	5.4511	0	0
gene111124	PA4152	-4.92616	5.33482	0	0
gene111126	PA4153	-5.43673	6.1629	0	0
gene111156	fpvB	-5.43898	5.54398	0	0
gene111170	piv	-5.83919	9.82769	0	0
gene111274	pchR	-4.3861	7.45808	0	0
gene111772	PA4467	-8.48266	8.6667	0	0
gene111774	sodM	-8.48006	9.04772	0	0
gene111776	PA4469	-8.41055	8.00367	0	0
gene111778	fumC1	-8.84839	10.0176	0	0
gene111780	PA4471	-7.88558	6.07319	0	0
gene111986	PA4570	-8.09672	8.02345	0	0
gene112022	ccpR	5.00407	10.4529	0	0
gene112028	pra	-4.64917	7.62121	0	0
gene112276	phuT	-3.44989	6.65652	0	0
gene112278	phuS	-5.18548	5.82802	0	0
gene112280	phuR	-6.29983	7.43805	0	0
gene105264	aprF	-3.98576	7.01708	0	5.5998e-307
gene102949	coIII	-4.06425	5.15409	1.03379e-307	5.26189e-306
gene104334	prpD	-3.76463	7.55549	1.4534e-304	7.33044e-303
gene113896	PA5506	4.66844	6.61645	2.02502e-303	1.01215e-301
gene107512	PA2366	-4.88726	7.75639	2.33971e-301	1.15899e-299
gene109925	arnC	5.31533	5.9957	1.4204e-295	6.97378e-294
gene103783	norC	7.73422	7.85186	2.68722e-294	1.30778e-292
gene110664	PA3922	-5.05169	8.82508	1.90352e-293	9.18325e-292
gene107606	PA2414	-3.36653	5.88398	2.75038e-292	1.31544e-290
gene105036	PA1134	-5.61509	4.39964	2.10127e-291	9.96395e-290
gene105334	PA1283	-3.23928	6.57129	4.67603e-291	2.19852e-289
gene103721	PA0492	5.56903	5.21358	1.13591e-286	5.29584e-285
gene105268	aprI	-3.01981	7.15989	1.41214e-286	6.52878e-285
gene106918	PA2069	-5.00846	6.65339	5.29261e-282	2.42673e-280
gene108556	PA2880	-3.91343	4.82693	3.33016e-281	1.5144e-279
gene111078	PA4129	5.1908	6.80118	1.3669e-280	6.1655e-279
gene102997	bauA	4.65732	7.01822	2.26713e-278	1.01436e-276
gene113898	PA5507	4.27618	7.15974	2.22057e-277	9.85576e-276
gene110171	PA3676	3.47218	8.60725	8.09914e-275	3.56619e-273
gene105368	PA1300	-3.96829	5.13459	1.20275e-273	5.25421e-272
gene160439	prrF2	-8.05817	4.78897	1.25613e-271	5.44452e-270
gene109937	PA3559	4.74282	7.07913	1.32874e-270	5.7146e-269
gene111570	sodB	3.12039	11.218	1.49139e-270	6.36481e-269
gene106166	popN	3.93501	4.75694	3.28411e-269	1.39086e-267
gene110266	lasB	-5.47002	11.5633	8.89352e-265	3.73797e-263
gene111098	PA4139	-4.3505	6.99788	1.08454e-262	4.52407e-261
gene111102	PA4141	-4.12163	9.59766	2.95965e-262	1.22538e-260
gene106634	metE	-3.21358	5.63917	4.97872e-262	2.03922e-260
gene109929	arnD	5.43601	5.26532	4.99882e-262	2.03922e-260
gene109605	nosD	5.68186	5.2917	6.71262e-261	2.71836e-259
gene112658	PA4896	-4.63068	4.11485	1.29707e-260	5.2146e-259
gene106182	pcrV	3.7621	5.33407	2.74039e-260	1.09379e-258
gene110646	PA3913	3.19096	6.8317	5.88746e-260	2.33312e-258
gene108618	PA2911	-2.94546	5.8258	2.4611e-259	9.68381e-258
gene109637	PA3409	-5.18725	3.93424	1.95597e-258	7.64207e-257
gene109283	PA3235	-4.89097	6.51809	1.43573e-257	5.57024e-256
gene107520	PA2370	-5.34243	4.22139	9.9386e-257	3.82912e-255
gene111080	PA4130	5.68347	9.38298	8.57548e-253	3.28116e-251
gene111834	PA4498	-2.8669	7.67471	3.85933e-252	1.46655e-250
gene103063	PA0165	3.29236	6.0509	3.86342e-250	1.45811e-248
gene106602	femR	-4.58685	4.32171	1.3817e-249	5.17951e-248
gene112042	oprJ	-3.54876	5.96085	6.84693e-249	2.54945e-247
gene107456	PA2338	-4.91548	5.73308	1.81831e-246	6.72532e-245
gene103785	norB	6.59245	8.57448	5.58109e-246	2.05059e-244
gene107712	foxR	-4.13081	4.49159	1.1052e-244	4.03398e-243
gene160437	prrF1	-5.68479	7.41192	4.84718e-244	1.75766e-242
gene107386	ambD	-3.30949	6.63988	9.87432e-241	3.55732e-239
gene107500	PA2360	-3.16152	5.23736	4.35237e-240	1.55787e-238
gene108896	rmf	-4.14803	10.3326	4.35315e-239	1.54816e-237
gene107524	PA2372	-3.29078	6.09076	9.36776e-239	3.31034e-237
gene107714	foxI	-3.29507	4.95764	1.57227e-238	5.52085e-237
gene102821	exoT	3.04004	6.89776	7.28102e-238	2.54057e-236
gene105332	PA1282	-5.8311	8.05783	2.31612e-237	8.03114e-236
gene102825	PA0046	3.2335	5.98444	3.09926e-235	1.06799e-233
gene112656	PA4895	-5.712	3.80074	5.95155e-234	2.03822e-232
gene107910	PA2566	-3.23786	5.54145	1.0898e-233	3.70934e-232
gene107388	ambC	-3.29494	7.04664	2.1989e-231	7.43873e-230
gene109649	PA3415	-3.7904	4.85381	3.77671e-228	1.26989e-226
gene134060	hemF	2.82604	8.11603	3.93028e-228	1.31357e-226
gene107526	PA2373	-2.78099	6.54975	1.51472e-224	5.03214e-223
gene109651	PA3416	-3.4415	4.93498	2.37835e-222	7.85421e-221
gene109983	glpK	-2.79383	7.26157	1.24308e-221	4.08085e-220
gene103677	fiuA	-3.65842	4.32638	1.01582e-218	3.31515e-217
gene108522	lipH	-5.43942	3.87744	6.77548e-218	2.19827e-216
gene103289	PA0276	-3.3712	4.70241	2.86708e-217	9.248e-216
gene113172	PA5150	-2.54571	6.79346	6.6584e-215	2.13531e-213
gene106292	PA1761	-2.43981	5.73456	5.06315e-214	1.61439e-212
gene104211	PA0730	4.55843	5.28114	2.65379e-212	8.41329e-211
gene102943	coxB	-3.07222	6.91698	5.08182e-212	1.60193e-210
gene102827	PA0047	2.88084	6.22508	8.94502e-212	2.80378e-210
gene106004	PA1617	-2.91075	8.26683	2.1227e-211	6.61616e-210
gene106338	PA1784	-3.41696	5.32155	2.64282e-211	8.19127e-210
gene104005	PA0633	3.21005	6.84545	1.60916e-210	4.95978e-209
gene106916	PA2068	-4.47841	4.5186	7.50543e-209	2.30056e-207
gene105362	PA1297	3.64027	5.20132	8.95061e-209	2.72846e-207
gene105272	PA1252	-2.52561	5.60282	1.78065e-208	5.39838e-207
gene107518	PA2369	-5.27594	5.87557	1.80811e-208	5.45183e-207
gene108114	fhp	5.37852	7.91404	5.22445e-208	1.56677e-206
gene109777	rhlA	-3.97563	8.92782	1.63741e-207	4.88405e-206
gene107390	ambB	-2.63344	8.70286	4.75849e-207	1.41177e-205
gene109539	lecB	-3.08029	5.64547	2.01046e-205	5.93299e-204
gene107382	PA2301	-2.79835	5.6429	1.80103e-202	5.28683e-201
gene113308	PA5217	-3.22764	9.05503	2.95893e-202	8.64007e-201
gene111114	acoR	-2.98848	7.67898	3.39412e-198	9.85895e-197
gene107462	PA2341	-5.11185	4.79343	5.30742e-198	1.53362e-196
gene111988	PA4571	3.5379	9.49479	6.26122e-198	1.79986e-196
gene112068	PA4610	2.67301	5.9952	7.57172e-198	2.16536e-196
gene113478	dadX	2.66383	7.95715	1.18382e-197	3.36812e-196
gene104602	PA0921	3.5301	4.65048	1.05159e-195	2.97664e-194
gene108958	PA3080	-2.60872	7.00618	3.18728e-195	8.97617e-194
gene107464	mtlD	-5.35943	4.42767	6.38199e-195	1.78825e-193
gene104009	PA0635	3.0669	5.36326	1.7064e-194	4.75734e-193
gene103681	fiuI	-4.32118	4.27327	1.96012e-194	5.43739e-193
gene104007	PA0634	3.14108	5.70185	7.15254e-194	1.97424e-192
gene109603	nosZ	7.08344	7.94197	2.28443e-193	6.27426e-192
gene107470	PA2345	-2.59973	6.03146	4.83672e-192	1.32188e-190
gene112986	phaC2	-2.70512	6.23873	5.27974e-192	1.43588e-190
gene105100	PA1166	-2.56854	5.48905	6.85249e-192	1.85452e-190
gene103975	PA0618	3.13333	5.90092	6.57203e-191	1.76998e-189
gene112044	mexD	-3.29671	6.92864	2.41112e-188	6.46227e-187
gene107502	PA2361	-2.50634	5.85809	2.89091e-188	7.71096e-187
gene106244	PA1737	-2.39829	6.4766	3.53329e-188	9.37928e-187
gene110644	PA3912	2.76309	6.42972	7.86572e-188	2.07805e-186
gene112026	PA4589	-2.77538	5.47932	1.43914e-187	3.78405e-186
gene107906	PA2564	-2.7643	5.17683	1.94648e-187	5.09391e-186
gene108220	cpo	-2.85282	4.9501	6.2134e-187	1.6184e-185
gene107740	PA2481	2.5691	6.97434	6.4986e-187	1.68478e-185
gene112644	PA4889	3.8796	5.15939	2.50188e-186	6.456e-185
gene109775	rhlB	-3.56747	8.0521	5.50858e-186	1.41489e-184
gene102985	PA0126	2.52261	7.32116	2.17903e-185	5.5711e-184
gene102823	PA0045	2.887	6.67713	8.94346e-183	2.27607e-181
gene103057	opdC	3.12651	5.47962	9.22864e-183	2.33792e-181
gene112490	fdnG	2.63082	9.17581	4.44383e-181	1.12065e-179
gene103983	PA0622	3.14015	7.94808	2.16997e-180	5.4475e-179
gene105028	rhlC	-3.72754	6.33332	1.04707e-179	2.61674e-178
gene108158	pfeR	-3.01926	5.21247	8.83425e-179	2.19787e-177
gene103771	nirC	3.90574	5.21186	4.55208e-178	1.12745e-176
gene109653	PA3417	-2.99731	4.71398	4.35755e-176	1.07447e-174
gene109629	hasE	-5.21412	2.95682	7.18956e-176	1.76494e-174
gene104344	PA0797	-2.46614	5.19656	9.02705e-176	2.20626e-174
gene106750	pqqA	-2.89484	5.99816	1.26916e-175	3.08828e-174
gene107516	PA2368	-5.34937	3.51527	3.48407e-175	8.44088e-174
gene107100	PA2160	-3.26168	4.20943	1.40651e-174	3.39276e-173
gene112488	fdnH	2.73738	6.77533	1.77246e-174	4.25698e-173
gene110173	PA3677	3.18673	6.76425	8.44925e-174	2.02054e-172
gene103977	PA0619	3.0244	5.45689	1.73865e-173	4.13992e-172
gene103779	PA0521	3.3077	4.21429	3.82012e-172	9.05727e-171
gene102959	PA0113	-4.01721	3.89403	7.99648e-172	1.88785e-170
gene106202	pscC	2.58922	5.5414	6.43395e-170	1.51252e-168
gene103911	PA0586	-2.5178	8.2142	1.90734e-168	4.46494e-167
gene107506	PA2363	-2.43149	6.46662	6.32708e-168	1.46873e-166
gene111578	icmP	-3.45196	10.4097	6.31157e-168	1.46873e-166
gene110540	PA3860	-2.13035	6.8086	6.79453e-168	1.57067e-166
gene107384	ambE	-3.61462	9.53401	7.13258e-168	1.64197e-166
gene107786	PA2504	-2.40129	6.56907	8.03561e-168	1.84221e-166
gene112642	desB	3.39131	4.65517	2.43395e-166	5.55703e-165
gene103985	PA0623	3.02508	6.53773	2.60955e-166	5.9093e-165
gene111842	PA4502	-2.8027	7.7317	2.60364e-166	5.9093e-165
gene109601	nosR	9.0942	7.90122	5.11186e-166	1.15287e-164
gene104237	PA0743	-2.13157	6.06433	1.14583e-165	2.57371e-164
gene111552	PA4357	-2.58544	5.34619	2.73802e-165	6.1252e-164
gene110175	PA3678	2.42865	6.72899	3.04569e-165	6.78615e-164
gene106834	PA2027	-4.34369	4.35089	7.27466e-165	1.61439e-163
gene104848	PA1041	-3.04199	8.82447	2.17375e-164	4.80477e-163
gene103753	PA0508	-2.3095	6.94922	3.19811e-164	7.04091e-163
gene109631	hasD	-5.05323	3.22663	7.25918e-164	1.59185e-162
gene103291	PA0277	3.01897	6.2087	1.45139e-163	3.17021e-162
gene112090	PA4621	2.20642	6.79295	9.34228e-163	2.03259e-161
gene102955	PA0111	-4.41537	3.27307	2.3831e-162	5.16462e-161
gene103971	PA0616	2.77031	5.25166	2.88379e-162	6.2254e-161
gene104346	pmtA	-3.26948	4.50041	3.60747e-161	7.75745e-160
gene108112	ppyR	3.49274	4.52162	4.38185e-161	9.38629e-160
gene111100	PA4140	-4.009	4.56776	4.03335e-160	8.60655e-159
gene103259	PA0262	2.29445	5.42222	5.13042e-159	1.09056e-157
gene108956	PA3079	-2.87465	7.84327	2.79955e-158	5.92821e-157
gene113946	tonB1	-2.29344	6.57027	6.4449e-158	1.35955e-156
gene112486	fdnI	2.62938	5.66794	8.7952e-158	1.84832e-156
gene109741	PA3461	-2.31476	5.73476	1.47221e-156	3.08219e-155
gene112448	PA4792	-2.1607	6.61507	7.89683e-155	1.64705e-153
gene110642	PA3911	2.33309	5.73393	1.01643e-154	2.11205e-153
gene110199	PA3690	2.8412	9.12121	1.74772e-154	3.61804e-153
gene111838	PA4500	-2.74344	9.34231	2.22786e-153	4.59485e-152
gene112410	PA4773	4.75771	5.60055	3.00669e-153	6.1782e-152
gene103951	agtD	2.06169	5.98984	3.96719e-153	8.12176e-152
gene105038	PA1135	-2.26565	5.95004	1.18018e-152	2.40722e-151
gene112336	PA4738	-2.85816	8.64189	1.61161e-152	3.27517e-151
gene112201	PA4675	-2.39834	7.59927	2.02265e-152	4.0955e-151
gene103429	PA0346	-3.22318	6.04855	1.70184e-151	3.43339e-150
gene102947	PA0107	-3.62866	3.66528	3.39396e-151	6.82236e-150
gene111230	mexG	-2.77143	5.3367	4.72729e-151	9.46824e-150
gene103765	nirL	2.72027	5.44354	5.32017e-151	1.06174e-149
gene112062	PA4607	-2.80793	9.18788	1.63375e-150	3.24876e-149
gene109607	nosF	5.61543	3.24758	1.40105e-149	2.77607e-148
gene113592	PA5359	-2.22169	6.35313	1.11492e-147	2.20126e-146
gene105148	PA1190	-2.79038	4.60064	1.34718e-147	2.6504e-146
gene103973	PA0617	3.35132	4.67859	1.48885e-147	2.91877e-146
gene107544	lldA	-2.25567	8.19527	2.13024e-146	4.16146e-145
gene107608	PA2415	-3.26486	3.99394	4.96259e-146	9.66051e-145
gene105030	PA1131	-2.3722	5.27352	9.41946e-146	1.82724e-144
gene107734	PA2478	-2.1926	5.28962	9.59066e-146	1.85397e-144
gene111104	PA4142	-2.80137	5.50783	1.71453e-145	3.30286e-144
gene112626	PA4880	3.00426	7.0543	3.70325e-145	7.10922e-144
gene106760	pqqH	-2.99499	4.42752	5.52061e-145	1.05615e-143
gene109867	gloA1	2.23087	7.79203	9.93543e-145	1.89422e-143
gene109721	PA3451	-2.87225	4.33136	1.03929e-143	1.97465e-142
gene106832	PA2026	2.48195	5.46511	1.18526e-143	2.24431e-142
gene103979	PA0620	2.32528	7.34794	4.10081e-143	7.73854e-142
gene102793	PA0027	-2.29654	7.69752	4.85544e-143	9.13152e-142
gene107528	PA2374	-3.65633	3.85792	9.35301e-143	1.75306e-141
gene102937	PA0102	-2.07636	7.95319	3.42624e-142	6.40026e-141
gene104021	PA0641	2.62248	7.23742	1.54332e-141	2.87327e-140
gene107742	PA2482	2.079	6.21974	2.68494e-141	4.98196e-140
gene110502	exoS	2.29479	7.34758	3.36616e-141	6.22515e-140
gene103469	PA0366	-2.05327	6.41043	5.06918e-141	9.34346e-140
gene108184	PA2699	-3.03417	4.33082	9.18806e-141	1.68792e-139
gene111992	PA4573	-2.41768	5.1544	1.46485e-139	2.68217e-138
gene102791	plcB	-2.16055	8.4814	3.12429e-139	5.70183e-138
gene107466	mtlY	-5.32891	3.16385	1.01972e-138	1.85488e-137
gene106648	PA1934	-2.01905	5.31945	3.17538e-138	5.7572e-137
gene108316	PA2764	-2.43334	5.43843	1.62949e-137	2.94475e-136
gene104017	PA0639	2.58864	5.18459	4.59549e-136	8.27785e-135
gene112412	PA4774	4.67904	5.94945	5.22239e-136	9.37665e-135
gene113096	PA5113	2.16726	7.5024	1.18188e-135	2.11518e-134
gene112205	PA4677	-1.99291	6.60335	1.38913e-135	2.4781e-134
gene102953	PA0110	-3.06778	3.83433	1.87808e-135	3.33962e-134
gene112704	pncB1	2.69716	9.21123	1.76548e-134	3.12935e-133
gene112338	PA4739	-2.79122	8.91847	3.60774e-134	6.37444e-133
gene106184	pcrH	3.24247	4.22385	6.19819e-134	1.09167e-132
gene112692	PA4913	-2.09979	5.9027	6.76139e-134	1.18709e-132
gene112532	PA4833	-2.15991	6.7974	2.4936e-133	4.36419e-132
gene108282	PA2747	-2.75271	7.45618	6.10061e-133	1.06435e-131
gene107104	PA2162	-3.52281	3.30942	1.64421e-132	2.85958e-131
gene103761	PA0512	2.49309	5.2913	2.86451e-132	4.96634e-131
gene104011	PA0636	2.75118	6.83052	3.6484e-132	6.30571e-131
gene103535	PA0399	-3.22764	8.18669	7.52935e-132	1.29729e-130
gene108310	PA2761	-2.24837	5.05177	2.03078e-131	3.48817e-130
gene109257	PA3222	-2.3982	6.46375	4.14118e-131	7.09113e-130
gene106160	pscP	4.41817	4.20942	1.08521e-130	1.85255e-129
gene103769	nirF	3.20442	7.49769	2.20238e-130	3.7481e-129
gene109609	nosY	5.91265	2.85406	2.27257e-130	3.85573e-129
gene102977	rahU	-2.68063	8.28877	3.86097e-129	6.53069e-128
gene110504	spcS	2.8232	4.61088	7.1547e-129	1.20651e-127
gene106158	pscQ	3.80367	4.01652	8.46083e-129	1.42244e-127
gene104620	PA0929	-2.69618	4.50606	1.29137e-128	2.16451e-127
gene103755	nirN	2.9534	6.98696	1.5607e-128	2.60805e-127
gene110618	PA3899	-3.17186	3.37828	5.33075e-128	8.88138e-127
gene106194	exsB	2.60101	4.78798	9.09211e-128	1.51027e-126
gene103723	PA0493	4.40711	3.42065	1.42334e-127	2.35722e-126
gene104414	PA0830	-2.24794	6.71499	2.60424e-127	4.3001e-126
gene106198	exsD	1.82711	7.08202	7.00667e-127	1.1535e-125
gene106162	pscO	4.36797	3.14807	9.42303e-127	1.54671e-125
gene107308	PA2264	2.42174	5.17066	1.2784e-126	2.0922e-125
gene113480	PA5303	1.99485	8.09804	1.29577e-126	2.11439e-125
gene103987	PA0624	2.60773	5.76108	1.29987e-126	2.11486e-125
gene103827	PA0545	2.15066	7.43285	2.66002e-125	4.31514e-124
gene107674	PA2448	-2.91749	4.6783	1.83475e-124	2.96769e-123
gene106912	PA2066	-3.62335	3.28934	3.15865e-124	5.09424e-123
gene104454	PA0850	-2.77456	4.05681	3.41406e-124	5.49021e-123
gene102795	PA0028	-2.64234	5.9687	1.6557e-123	2.65487e-122
gene107902	PA2562	-1.88402	7.01254	2.29253e-123	3.66541e-122
gene108474	PA2840	2.13976	6.06831	2.89846e-122	4.62087e-121
gene112217	PA4683	2.92635	6.01175	3.07236e-122	4.88408e-121
gene106186	popB	2.39321	6.33855	3.42238e-122	5.42497e-121
gene107392	ambA	-2.11531	6.54441	1.42727e-121	2.25598e-120
gene107226	PA2223	-1.895	6.08268	6.11682e-121	9.64094e-120
gene103537	PA0400	-2.73764	8.15314	9.3956e-121	1.47668e-119
gene108144	PA2679	-2.28204	6.42962	1.06097e-120	1.66279e-119
gene106190	exsC	2.64541	6.21306	2.15437e-120	3.36688e-119
gene109935	arnF	5.08316	3.39831	3.44393e-120	5.36711e-119
gene103965	PA0613	2.71975	4.63341	5.80418e-120	9.02006e-119
gene106600	femA	-3.43529	3.07262	5.86247e-120	9.08519e-119
gene107460	PA2340	-4.51563	3.4908	1.3282e-119	2.05261e-118
gene109981	glpF	-1.89792	5.56936	1.67652e-119	2.5837e-118
gene103317	PA0290	-1.79696	5.93916	5.17653e-119	7.95551e-118
gene105902	pauA3	4.0317	4.11329	5.72494e-119	8.77403e-118
gene105032	PA1132	2.51703	4.91527	2.46533e-118	3.76794e-117
gene104386	PA0818	-2.69675	3.63416	4.26211e-118	6.49621e-117
gene109627	PA3404	-4.16544	2.59926	4.63293e-118	7.04206e-117
gene103881	PA0572	-3.38309	10.3089	9.93988e-118	1.50673e-116
gene110620	PA3900	-3.34785	3.25981	1.84212e-117	2.78477e-116
gene108110	PA2662	3.14035	6.54789	2.82944e-117	4.26569e-116
gene107926	PA2573	-1.89165	6.70915	3.60066e-117	5.41367e-116
gene102837	PA0052	-2.47936	4.40763	9.69122e-117	1.45316e-115
gene111292	katA	2.34971	10.8554	1.0336e-116	1.54567e-115
gene105372	PA1302	-2.30077	4.97537	4.52348e-116	6.72823e-115
gene109933	arnE	5.24696	3.14059	4.51542e-116	6.72823e-115
gene112268	cbpA	-2.16309	6.40166	5.37247e-116	7.96964e-115
gene103725	PA0494	3.19549	5.38881	1.08291e-115	1.60213e-114
gene109773	rhlR	-2.08983	9.32509	1.64068e-115	2.42087e-114
gene112690	PA4912	-3.14065	3.22418	1.88333e-115	2.77155e-114
gene102993	bauC	2.5305	7.61413	1.97093e-115	2.89278e-114
gene111096	tyrS	2.85227	5.64915	7.6066e-115	1.11349e-113
gene105474	PA1353	-2.82172	4.49375	1.45284e-114	2.12114e-113
gene111234	mexI	-1.97417	6.26747	1.16538e-113	1.69699e-112
gene112354	PA4746.1	2.55038	5.83094	1.64309e-113	2.38636e-112
gene108330	PA2771	-2.07212	5.27792	6.30166e-113	9.12836e-112
gene111232	mexH	-2.49701	5.45517	9.46685e-113	1.36776e-111
gene106070	PA1650	-1.97535	6.1047	3.54122e-112	5.10304e-111
gene107960	PA2588	-1.88212	5.97696	5.03209e-112	7.23265e-111
gene112688	PA4911	-3.13403	3.31463	5.5636e-112	7.97593e-111
gene106914	PA2067	-3.62454	3.39916	9.66051e-112	1.38135e-110
gene112686	PA4910	-3.18555	3.4315	1.09425e-111	1.56064e-110
gene112716	PA4925	-2.43047	4.77252	1.23185e-111	1.75238e-110
gene104458	cbpD	-2.98382	9.40444	1.28366e-111	1.82142e-110
gene110264	PA3723	-2.2102	7.27685	4.20656e-110	5.95357e-109
gene104580	PA0910	2.67043	4.70492	4.77929e-110	6.74694e-109
gene105818	alkB2	-2.36795	4.117	8.71386e-110	1.22702e-108
gene102909	tssF1	2.11064	6.73979	1.23416e-109	1.73345e-108
gene103763	PA0513	2.70902	4.66497	1.4956e-109	2.09536e-108
gene106606	PA1913	1.82112	6.24512	2.59273e-109	3.62329e-108
gene102907	tssE1	2.1685	5.23363	4.38141e-109	6.10755e-108
gene111238	phzM	-3.84787	7.69156	4.65423e-109	6.4716e-108
gene109000	xcpW	-1.79412	5.76658	4.77851e-109	6.62779e-108
gene104037	trpG	1.89108	6.93216	5.74644e-109	7.95043e-108
gene104239	PA0744	-2.24614	7.38691	1.01485e-108	1.40059e-107
gene107730	dsbG	-1.93525	5.35191	1.07568e-108	1.48086e-107
gene111106	PA4143	-2.21875	4.25632	1.35141e-108	1.85585e-107
gene134062	aroE	1.80339	7.01321	4.14788e-108	5.68208e-107
gene110976	PA4078	-2.19538	4.90539	4.20859e-108	5.75104e-107
gene107106	PA2163	-3.68612	2.94133	5.10732e-108	6.96202e-107
gene107458	PA2339	-4.65116	3.72932	8.05156e-108	1.09485e-106
gene105900	pauB2	3.53561	4.73701	8.5356e-108	1.15784e-106
gene108624	PA2914	-2.89785	3.30376	8.60239e-108	1.16405e-106
gene112552	PA4843	2.1823	8.99455	9.10176e-108	1.22863e-106
gene106752	pqqB	-2.56044	4.90522	1.16656e-107	1.57089e-106
gene103727	PA0495	2.81568	5.38529	2.4192e-107	3.24982e-106
gene106922	fusA2	-1.83218	7.56039	7.53964e-107	1.01038e-105
gene110063	rpoS	-1.87877	11.043	7.87624e-107	1.05295e-105
gene107224	PA2222	-2.02772	5.47408	1.22056e-106	1.6278e-105
gene103867	PA0565	-2.18266	4.96503	1.37848e-106	1.834e-105
gene108574	atuD	-1.98133	5.91607	2.03506e-106	2.70108e-105
gene113848	PA5482	-2.50928	5.94119	5.12409e-106	6.78483e-105
gene103913	PA0587	-2.24183	8.60801	9.67852e-106	1.27849e-104
gene103777	nirQ	1.86806	6.84553	9.90973e-106	1.30592e-104
gene106066	PA1648	-1.96054	4.87568	2.39044e-105	3.14269e-104
gene102995	bauB	3.04508	4.35799	3.02363e-105	3.96575e-104
gene103967	PA0614	2.89304	3.98358	4.13632e-105	5.41234e-104
gene107994	PA2604	-2.27313	10.7835	1.77536e-104	2.31757e-103
gene103759	nirJ	2.44064	6.44931	4.40027e-104	5.73068e-103
gene106924	PA2072	-2.19845	5.50304	7.48531e-104	9.72564e-103
gene105300	PA1266	-3.48786	2.88963	9.33632e-104	1.21023e-102
gene103995	PA0628	2.66428	5.47405	1.08364e-103	1.40141e-102
gene107162	exoY	2.28846	4.30938	1.28255e-103	1.65479e-102
gene105304	PA1268	-2.90131	3.35382	1.8069e-103	2.32591e-102
gene107110	PA2165	-2.52337	3.94834	1.92084e-103	2.46685e-102
gene107264	pslL	-1.87272	5.74249	6.48078e-103	8.30378e-102
gene103767	PA0515	2.70653	5.28253	4.45995e-102	5.70133e-101
gene106540	PA1880	-1.82489	6.17541	6.07922e-102	7.75346e-101
gene108996	xcpY	-1.80516	6.16715	9.22515e-102	1.17388e-100
gene111694	sspA	1.80292	6.46626	1.1458e-101	1.45466e-100
gene110580	PA3880	2.05035	5.66711	1.51056e-101	1.91338e-100
gene106200	pscB	2.48588	4.28919	1.68577e-101	2.13044e-100
gene111254	phzS	-4.67789	9.02751	3.73016e-101	4.70339e-100
gene112428	PA4782	2.49595	4.3335	7.49703e-101	9.43164e-100
gene106598	PA1909	-3.35367	2.70607	9.38497e-101	1.178e-99
gene113306	PA5216	-1.66308	6.52537	9.70711e-101	1.21569e-99
gene107638	PA2430	-2.10169	4.27464	1.05926e-100	1.3236e-99
gene110608	PA3894	2.3668	4.148	1.41349e-100	1.76225e-99
gene109889	PA3535	-1.85645	6.43014	1.76686e-100	2.19788e-99
gene110396	PA3789	2.0488	6.58046	2.563e-100	3.18111e-99
gene104702	tolR	-1.66197	7.31734	2.72838e-100	3.37881e-99
gene104015	PA0638	2.3214	5.25857	5.16821e-100	6.38602e-99
gene108702	PA2953	1.91092	9.02937	7.6565e-100	9.43962e-99
gene106782	atoB	-2.97896	8.21625	2.07001e-99	2.54644e-98
gene103989	PA0625	2.55221	7.50414	9.14201e-99	1.12212e-97
gene113300	gcvP1	-1.64165	7.00751	1.34538e-98	1.64771e-97
gene107298	ptxS	-1.68521	6.21394	1.5211e-98	1.85882e-97
gene105416	PA1324	-1.78805	6.79442	1.53597e-98	1.87288e-97
gene110506	PA3843	2.94348	3.59263	1.58726e-98	1.93116e-97
gene112708	choE	1.83172	6.06018	1.67115e-98	2.02878e-97
gene107112	PA2166	-3.21502	5.03062	3.53879e-98	4.28672e-97
gene109006	xcpT	-1.95934	7.33653	4.88592e-98	5.90569e-97
gene106196	exsA	1.82627	6.85935	6.89844e-98	8.32012e-97
gene107644	PA2433	-2.52637	5.14273	7.67655e-98	9.2385e-97
gene102957	PA0112	-3.50081	3.29646	3.0015e-97	3.6044e-96
gene105782	PA1507	-2.26265	4.72822	3.01184e-97	3.609e-96
gene102903	hcp1	1.95968	9.66874	5.96871e-97	7.13672e-96
gene113726	fdhA	-1.73092	5.61119	8.06133e-96	9.61812e-95
gene107728	PA2475	-1.95276	4.97327	2.15319e-95	2.5635e-94
gene113118	ntrB	2.30219	4.91519	1.17272e-94	1.3932e-93
gene106518	PA1869	-2.25165	6.58768	1.20966e-94	1.43401e-93
gene103137	PA0201	2.18004	5.52272	2.16641e-94	2.56274e-93
gene108688	PA2946	-1.59391	7.78416	2.74985e-94	3.246e-93
gene107530	PA2375	-2.68658	3.51216	4.93169e-94	5.80913e-93
gene108994	xcpZ	-2.0991	4.61827	5.03112e-94	5.9137e-93
gene111554	PA4358	-1.72217	8.23322	5.09366e-94	5.97455e-93
gene105972	PA1601	2.43878	4.19596	1.02719e-93	1.20228e-92
gene109469	clpP2	-2.72119	10.2106	1.25414e-93	1.46483e-92
gene108418	PA2815	-1.96581	8.56762	1.57586e-93	1.83674e-92
gene106780	dhcB	-3.28045	7.76869	1.6728e-93	1.94564e-92
gene106778	dhcA	-2.72094	8.22244	2.1697e-93	2.51831e-92
gene103107	PA0187	-2.77141	3.86332	2.34031e-93	2.71066e-92
gene110792	PA3986	-2.28981	4.61186	4.76501e-93	5.50756e-92
gene104059	PA0660	-1.75814	7.72638	5.97238e-93	6.88872e-92
gene107114	PA2167	-2.85148	3.39124	6.8247e-93	7.85548e-92
gene113904	PA5510	1.99731	6.80896	1.11871e-92	1.28501e-91
gene106176	pcrD	1.86622	5.02668	1.22503e-92	1.40423e-91
gene106036	kdpA	3.53712	3.84031	1.78503e-92	2.04193e-91
gene108476	PA2841	-1.84117	5.56574	2.44717e-92	2.7936e-91
gene109639	PA3410	-3.20702	2.52936	3.98294e-92	4.53744e-91
gene103991	PA0626	1.97413	5.37737	4.81531e-92	5.47446e-91
gene111452	pctC	1.62037	8.17458	8.39735e-92	9.5273e-91
gene103019	nuh	-1.6838	7.1773	1.31256e-91	1.48614e-90
gene104904	PA1069	1.89368	8.60283	2.24349e-91	2.535e-90
gene109485	PA3334	-2.91581	6.37402	2.54135e-91	2.86573e-90
gene107908	PA2565	-2.56901	3.59398	3.37353e-91	3.79642e-90
gene109004	xcpU	-1.85987	6.05252	3.52798e-91	3.96219e-90
gene105302	PA1267	-3.72104	3.47037	3.54439e-91	3.97258e-90
gene112346	rbfA	1.70827	6.46765	8.1033e-91	9.06393e-90
gene108572	atuC	-1.7	5.49349	1.20505e-90	1.34519e-89
gene106168	pcr1	3.50533	2.45049	3.13309e-90	3.49043e-89
gene104019	PA0640	2.59265	5.14444	3.9925e-90	4.43895e-89
gene103915	PA0588	-2.04294	10.8714	5.433e-90	6.02846e-89
gene106226	PA1728	-1.83101	7.11536	7.60373e-90	8.42026e-89
gene106402	PA1811	1.76008	6.61938	8.604e-90	9.50897e-89
gene104920	flgB	1.58251	6.32873	1.34329e-89	1.48162e-88
gene103757	PA0510	2.37393	6.34839	1.87564e-89	2.06469e-88
gene102941	PA0104	-2.52813	3.602	2.00347e-89	2.20104e-88
gene112106	PA4629	2.13811	4.81584	2.95547e-89	3.2405e-88
gene104586	mgtE	3.24415	8.77115	6.33323e-89	6.93032e-88
gene103255	PA0260	1.52658	6.60157	8.08092e-89	8.82538e-88
gene112012	PA4582	2.11391	4.83743	1.38595e-88	1.51066e-87
gene106682	PA1951	-1.86334	4.71423	6.32306e-88	6.8785e-87
gene107188	PA2204	2.4681	6.71291	7.71413e-88	8.37535e-87
gene107108	PA2164	-3.01959	3.23537	9.64483e-88	1.04511e-86
gene111504	PA4333	1.96269	9.1325	5.17343e-87	5.59497e-86
gene106188	popD	2.19933	6.12581	6.02995e-87	6.50859e-86
gene105950	braB	-1.66968	7.76072	1.88843e-86	2.03438e-85
gene109277	PA3232	-2.11283	4.66524	2.46787e-86	2.65344e-85
gene107892	PA2557	-2.12394	6.78529	4.58876e-86	4.92426e-85
gene112046	mexC	-2.47763	5.29984	4.87807e-86	5.22462e-85
gene112420	cueR	-1.60485	7.01015	6.97266e-86	7.45363e-85
gene109489	PA3336	-3.58852	7.21913	9.39074e-86	1.00192e-84
gene111840	opdD	-3.25803	7.04907	1.02001e-85	1.08618e-84
gene112510	PA4822	8.29746	8.83675	1.09967e-85	1.16877e-84
gene111678	PA4420	1.91585	8.26446	1.81872e-85	1.92931e-84
gene113846	PA5481	-2.35084	6.75236	1.8552e-85	1.96425e-84
gene112682	PA4908	-2.25065	3.51439	2.0744e-85	2.19215e-84
gene102915	vgrG1	1.69456	6.93077	4.86022e-85	5.12633e-84
gene106556	PA1888	-2.12122	4.94821	5.13403e-85	5.40486e-84
gene112514	PA4824	8.59464	8.30254	9.76083e-85	1.02563e-83
gene103969	PA0615	1.7643	5.75088	3.53693e-84	3.70943e-83
gene112660	PA4897	-2.37512	3.74344	3.72682e-84	3.9012e-83
gene104550	aruD	1.62971	8.31148	5.5012e-84	5.74776e-83
gene106266	PA1748	-1.47602	6.60482	6.39698e-84	6.67114e-83
gene104770	mvfR	-1.51384	7.29819	8.16874e-84	8.50285e-83
gene104336	PA0793	-1.81686	5.875	1.36908e-83	1.42241e-82
gene104342	prpB	-2.38194	7.43745	1.82043e-83	1.88781e-82
gene106192	exsE	2.23879	4.3932	3.05253e-83	3.1596e-82
gene105420	ilvA2	1.9383	6.48758	3.15614e-83	3.26075e-82
gene103947	agtB	1.91888	8.09737	3.80239e-83	3.92113e-82
gene111748	PA4455	1.57383	7.42556	5.85006e-83	6.02155e-82
gene106294	PA1762	-1.86168	4.72026	6.68862e-83	6.87194e-82
gene111864	PA4513	-1.67256	5.33559	9.8524e-83	1.01037e-81
gene111832	PA4497	-2.23026	6.73181	1.40198e-82	1.43509e-81
gene108832	PA3018	2.02935	6.08733	1.77528e-82	1.81386e-81
gene108620	PA2912	-2.5658	3.32825	3.33235e-82	3.39851e-81
gene109943	fruI	1.59795	6.21027	3.63006e-82	3.69533e-81
gene108318	PA2765	1.49748	7.16801	5.94522e-82	6.04104e-81
gene109074	PA3133.2	2.23841	5.77537	8.60661e-82	8.72933e-81
gene113098	PA5114	1.56302	7.97741	1.06533e-81	1.07855e-80
gene103949	agtC	2.24399	6.74813	1.5372e-81	1.55344e-80
gene112684	PA4909	-2.16013	3.75199	2.27314e-81	2.29298e-80
gene112984	phaD	-1.61271	5.62841	5.00974e-81	5.04429e-80
gene103061	PA0164	1.80709	5.0606	1.50732e-80	1.51496e-79
gene104241	PA0745	-1.6752	7.42848	1.59483e-80	1.60002e-79
gene107072	PA2146	-4.36245	2.3271	2.6983e-80	2.7022e-79
gene103981	PA0621	1.95636	4.77664	3.59761e-80	3.59631e-79
gene109255	csaA	-1.94545	6.47304	4.13719e-80	4.12827e-79
gene103269	gabT	2.25877	10.4895	4.49379e-80	4.47604e-79
gene106236	PA1733	-1.77749	5.36252	9.63532e-80	9.58006e-79
gene111850	PA4506	-1.54101	6.27264	1.92954e-79	1.91504e-78
gene111868	PA4515	-2.05076	4.58419	1.99766e-79	1.97911e-78
gene104314	putA	1.95712	9.76183	2.93767e-79	2.9052e-78
gene112518	PA4826	5.72528	7.61241	3.07735e-79	3.03793e-78
gene111722	cysN	2.05929	7.98868	3.19773e-79	3.15115e-78
gene102969	PA0118	-1.69378	5.05931	3.46381e-79	3.40731e-78
gene107504	PA2362	-1.90899	4.18025	3.47588e-79	3.41313e-78
gene103729	PA0496	2.26065	5.37929	3.58846e-79	3.51745e-78
gene103203	PA0234	-2.3526	3.26391	4.67528e-79	4.57468e-78
gene108188	PA2701	-2.2005	3.78367	6.63202e-79	6.4779e-78
gene112512	PA4823	9.09617	5.40033	6.79779e-79	6.62815e-78
gene110398	oprC	2.11565	8.92304	6.89271e-79	6.70891e-78
gene103257	PA0261	2.04629	4.5305	8.90918e-79	8.65642e-78
gene110236	PA3709	-2.24409	3.9792	9.64126e-79	9.35135e-78
gene107702	PA2462	1.68479	10.0887	1.29523e-78	1.25409e-77
gene106204	pscD	2.20806	4.14081	1.44461e-78	1.39629e-77
gene109012	xcpP	-1.47393	6.94522	1.97352e-78	1.90419e-77
gene110840	PA4010	1.64725	6.88699	2.87227e-78	2.76655e-77
gene106528	PA1874	-1.96489	5.40823	2.88202e-78	2.77113e-77
gene104978	PA1106	-1.41088	6.4131	3.82285e-78	3.6694e-77
gene107048	PA2134	-2.99879	3.12176	3.91467e-78	3.75105e-77
gene112912	PA5021	1.36208	6.56781	4.26918e-78	4.08369e-77
gene106532	PA1876	-1.83571	4.85532	4.50197e-78	4.29896e-77
gene106180	pcrG	4.06039	2.7487	5.77164e-78	5.5019e-77
gene103781	PA0522	3.75007	2.03815	8.49646e-78	8.08548e-77
gene108228	PA2721	-2.03785	4.11989	9.70742e-78	9.22205e-77
gene104928	flgF	1.36776	6.58335	1.1385e-77	1.07972e-76
gene106758	pqqE	-2.30172	4.90628	1.58124e-77	1.49705e-76
gene111136	fepC	-3.42755	2.23733	1.71593e-77	1.6218e-76
gene113758	PA5437	2.03714	5.39277	2.07398e-77	1.95688e-76
gene103109	PA0188	-2.30095	3.51764	2.51379e-77	2.36783e-76
gene103963	ptrB	2.81476	3.55411	5.93555e-77	5.58143e-76
gene103083	PA0175	-1.70186	4.92475	8.68325e-77	8.15138e-76
gene107034	cgrA	1.56731	7.19825	1.0211e-76	9.56934e-76
gene105578	PA1405	1.55857	5.66204	1.13255e-76	1.05959e-75
gene109483	fabH2	-3.13369	7.75326	1.2742e-76	1.19011e-75
gene107624	PA2423	-1.91307	6.19267	1.67556e-76	1.56235e-75
gene109719	PA3450	2.10441	5.26943	2.01823e-76	1.87871e-75
gene112988	PA5059	-2.41156	3.89068	2.64191e-76	2.45516e-75
gene112816	thiC	1.62364	8.04331	2.89517e-76	2.68602e-75
gene111418	PA4290	-3.22441	6.431	5.82995e-76	5.39976e-75
gene109281	PA3234	-4.50211	7.90636	6.92455e-76	6.4029e-75
gene107310	PA2265	2.23079	5.47976	9.7567e-76	9.00669e-75
gene104992	PA1112	-1.98608	6.67718	1.01374e-75	9.34257e-75
gene108670	PA2937	-2.46031	4.80084	1.20788e-75	1.11133e-74
gene104700	tolQ	-1.69063	8.2541	1.33717e-75	1.22825e-74
gene108214	PA2714	-1.80108	4.96028	1.51264e-75	1.38713e-74
gene103705	PA0484	-1.55445	6.21859	1.63633e-75	1.49808e-74
gene113070	hutU	-4.51155	6.50785	1.79042e-75	1.63645e-74
gene103945	agtA	2.30366	7.22005	2.01646e-75	1.84002e-74
gene112118	PA4635	6.56363	5.74297	2.32926e-75	2.12196e-74
gene112414	PA4775	2.51126	4.92951	2.40356e-75	2.18606e-74
gene107704	PA2463	1.82638	5.03921	3.31541e-75	3.01046e-74
gene111750	PA4456	1.52163	8.26019	3.37022e-75	3.05523e-74
gene112516	mgtA	9.80776	11.4628	4.93901e-75	4.47009e-74
gene110272	PA3727	1.57156	6.11201	5.47971e-75	4.95138e-74
gene111252	phzG1	-4.38768	2.11188	5.73986e-75	5.17801e-74
gene106642	PA1931	-2.34268	3.10588	7.74992e-75	6.97996e-74
gene107086	glgB	-2.15315	3.56169	9.78972e-75	8.80282e-74
gene107312	PA2266	1.96899	4.84013	1.01162e-74	9.08169e-74
gene107178	PA2199	-1.37349	7.16433	1.0711e-74	9.60013e-74
gene108692	cobM	-2.34954	4.69187	2.36876e-74	2.11966e-73
gene107924	PA2572	-1.49117	6.47185	3.53433e-74	3.15757e-73
gene111378	PA4277.1	2.13818	6.42626	8.71556e-74	7.77395e-73
gene109549	amiE	2.09192	7.57287	8.77004e-74	7.80998e-73
gene106608	PA1914	-2.42093	2.75483	1.08609e-73	9.65643e-73
gene111708	PA4435	-1.73285	6.61537	2.0267e-73	1.79906e-72
gene104506	PA0876	1.3679	6.02804	2.54242e-73	2.25325e-72
gene109179	zwf	2.85161	7.55253	2.80894e-73	2.48549e-72
gene104546	aruF	1.54612	8.37106	3.97382e-73	3.51063e-72
gene102905	tagJ1	1.42294	6.59016	4.14522e-73	3.65623e-72
gene113756	PA5436	2.19611	9.61965	4.27796e-73	3.76732e-72
gene107128	PA2174	-2.34433	3.14477	5.29566e-73	4.65615e-72
gene108632	PA2918	-2.14081	3.88869	1.09472e-72	9.60996e-72
gene110262	PA3722	1.68219	6.85338	2.18013e-72	1.9108e-71
gene111680	PA4421	2.3526	7.79428	2.4152e-72	2.11349e-71
gene109509	PA3346	-1.3592	6.77339	2.58024e-72	2.25436e-71
gene110238	PA3710	-1.55461	5.72286	3.65699e-72	3.19009e-71
gene113482	dadA	1.51506	9.48842	6.23578e-72	5.4311e-71
gene113362	PA5244	1.86342	6.03114	6.44445e-72	5.60404e-71
gene112436	PA4786	-1.4936	5.87027	8.69936e-72	7.55306e-71
gene108622	PA2913	-2.75089	3.76939	1.19892e-71	1.03931e-70
gene109791	PA3486	2.03705	4.14007	1.28796e-71	1.11476e-70
gene109683	PA3432	3.0663	4.26803	1.34238e-71	1.16005e-70
gene105464	PA1348	-1.72745	4.3598	1.53572e-71	1.32506e-70
gene104582	PA0911	2.59764	3.8567	1.70875e-71	1.47208e-70
gene109439	PA3311	-1.86553	5.08498	2.0122e-71	1.73081e-70
gene108420	PA2816	-1.82372	4.58102	2.06798e-71	1.77603e-70
gene103851	PA0557	-2.39048	3.01511	2.42851e-71	2.08244e-70
gene109487	PA3335	-2.84179	7.07176	2.82281e-71	2.41681e-70
gene106596	PA1908	-3.43361	2.02509	3.19632e-71	2.73239e-70
gene107328	PA2274	-2.72897	3.6054	4.41069e-71	3.76469e-70
gene110075	PA3628	-1.58951	7.26573	7.69189e-71	6.55524e-70
gene108546	PA2875	-1.33492	6.79734	1.13845e-70	9.68726e-70
gene111236	opmD	-2.04546	4.77292	1.3233e-70	1.1243e-69
gene106784	PA2002	-2.17782	5.27666	1.90809e-70	1.61866e-69
gene104003	PA0632	3.19465	3.04113	2.16508e-70	1.83387e-69
gene104622	PA0930	-1.95445	4.37927	4.02595e-70	3.40488e-69
gene109611	nosL	4.62736	2.72601	6.47825e-70	5.47052e-69
gene107856	PA2539	1.52323	5.92394	6.62492e-70	5.58588e-69
gene109481	PA3332	-2.99018	7.40134	7.36338e-70	6.19909e-69
gene106754	pqqC	-2.06309	4.43186	8.69383e-70	7.30809e-69
gene108686	PA2945	-1.43349	7.41807	1.00006e-69	8.39384e-69
gene113474	cycB	1.72811	8.84757	1.0314e-69	8.64378e-69
gene104025	PA0643	1.55926	5.56346	1.25028e-69	1.04624e-68
gene107610	treA	-2.41108	3.34953	1.92203e-69	1.60594e-68
gene104243	PA0746	-1.69959	6.89821	1.9557e-69	1.63162e-68
gene106500	PA1860	-1.67753	4.85701	2.41539e-69	2.0121e-68
gene109002	xcpV	-1.71396	4.86605	2.92187e-69	2.43036e-68
gene103997	PA0629	2.36929	4.13441	4.22048e-69	3.50527e-68
gene108160	pfeS	-2.46106	4.44732	4.38862e-69	3.63947e-68
gene113466	rep	1.52808	7.47381	5.53939e-69	4.58695e-68
gene105476	PA1354	-1.99542	4.27788	6.19556e-69	5.12265e-68
gene113414	PA5270	1.50221	6.41281	6.21104e-69	5.12781e-68
gene106052	PA1641	-1.60562	4.74517	8.69857e-69	7.17083e-68
gene111848	PA4505	-1.72475	6.16903	9.23695e-69	7.60335e-68
gene106640	PA1930	-2.1434	5.77161	9.3341e-69	7.67194e-68
gene112702	PA4918	2.29282	8.10935	1.34609e-68	1.10475e-67
gene107134	PA2177	-1.40092	5.41112	1.49729e-68	1.22703e-67
gene113976	PA5546	-1.49513	8.43282	1.60265e-68	1.31143e-67
gene108280	PA2746	-3.15189	3.75798	3.5476e-68	2.89869e-67
gene106170	pcr2	3.20645	2.51062	7.78256e-68	6.34965e-67
gene105466	PA1349	-2.25768	2.79517	1.4206e-67	1.15734e-66
gene112744	PA4937.2	2.15785	5.83038	1.73685e-67	1.41291e-66
gene106242	PA1736	-1.50854	5.46473	2.02936e-67	1.64845e-66
gene107922	PA2571	-1.61776	5.50172	2.69672e-67	2.18734e-66
gene102891	tssK1	1.35045	6.97673	3.49522e-67	2.83087e-66
gene105414	PA1323	-1.55421	6.42043	3.86992e-67	3.12978e-66
gene103079	PA0173	-2.68386	3.11786	5.63409e-67	4.54992e-66
gene108808	psrA	1.93084	8.64833	7.29748e-67	5.88465e-66
gene107958	pqsH	-1.358	7.82587	1.4593e-66	1.17506e-65
gene106372	PA1797	-1.72273	4.3349	1.6207e-66	1.30314e-65
gene102893	tssJ1	1.37231	5.63866	1.82629e-66	1.46632e-65
gene106078	PA1654	1.35683	6.66682	1.97866e-66	1.58636e-65
gene107858	PA2540	1.4664	7.56828	2.06077e-66	1.6498e-65
gene108186	opdB	-2.46206	3.13241	2.55859e-66	2.04539e-65
gene102911	tssG1	2.05804	5.51288	4.80702e-66	3.83732e-65
gene109739	PA3460	-1.69689	5.99133	5.28421e-66	4.21218e-65
gene107098	PA2159	-2.54125	2.77668	5.59829e-66	4.45614e-65
gene106148	PA1689	-1.60157	7.41102	7.4448e-66	5.91744e-65
gene109010	xcpR	-1.38562	7.94494	1.07141e-65	8.50387e-65
gene102931	PA0099	1.48011	5.89418	1.13613e-65	9.00466e-65
gene105042	PA1137	2.72762	4.81125	1.26726e-65	1.00296e-64
gene110274	PA3728	1.43129	9.40774	2.88247e-65	2.27805e-64
gene113764	PA5440	1.42515	7.18571	3.10959e-65	2.45406e-64
gene109279	PA3233	-3.13771	6.14601	3.50327e-65	2.76081e-64
gene105106	PA1169	-2.04351	4.22251	3.67998e-65	2.89596e-64
gene110021	PA3601	-2.31359	3.21811	4.23233e-65	3.32591e-64
gene112874	PA5002	1.30408	6.85259	8.77955e-65	6.88953e-64
gene104340	prpC	-1.96119	8.69971	9.56788e-65	7.48747e-64
gene105480	PA1356	-2.7367	3.06255	9.56853e-65	7.48747e-64
gene109693	folM	1.497	5.54704	1.58355e-64	1.2374e-63
gene110576	narX	1.44189	6.75473	1.7564e-64	1.37053e-63
gene108842	PA3023	-1.48381	5.61516	1.84782e-64	1.43984e-63
gene106828	PA2024	-1.82583	4.83893	2.25537e-64	1.75495e-63
gene108570	atuB	-1.57717	4.7123	3.21189e-64	2.49573e-63
gene112742	PA4937.1	2.2541	5.75968	3.35866e-64	2.60613e-63
gene111846	PA4504	-1.66114	5.64895	3.4485e-64	2.67211e-63
gene107866	PA2544	-1.46215	5.99532	3.90143e-64	3.01884e-63
gene108936	PA3069	1.58226	5.03388	4.60951e-64	3.56178e-63
gene113108	glnA	1.77254	9.99684	7.24649e-64	5.59159e-63
gene103893	dnaG	1.36249	7.55905	1.17344e-63	9.04199e-63
gene106520	PA1870	-2.30641	3.32753	2.40115e-63	1.84766e-62
gene112614	PA4874	-1.39096	7.4275	2.6944e-63	2.07044e-62
gene112161	PA4657	-1.23876	7.20017	4.16683e-63	3.19745e-62
gene108580	atuG	-1.95451	3.87526	5.50768e-63	4.22052e-62
gene104189	PA0720	1.77868	4.47635	8.62868e-63	6.60302e-62
gene104574	PA0907	1.9656	4.7666	9.78019e-63	7.4739e-62
gene107118	PA2169	-3.07396	2.24322	1.0135e-62	7.73435e-62
gene112370	PA4753	1.31875	6.10021	1.52896e-62	1.1652e-61
gene111668	mraY	1.29278	7.83389	5.50969e-62	4.19311e-61
gene105470	PA1351	-2.34183	2.72531	6.46241e-62	4.91143e-61
gene109201	edd	2.21849	7.52112	7.6533e-62	5.80855e-61
gene111818	magC	1.32933	6.2852	8.20586e-62	6.21941e-61
gene103357	PA0310	1.55203	5.07585	9.30322e-62	7.04151e-61
gene112274	PA4707	-1.41976	4.83705	1.01045e-61	7.63756e-61
gene111562	PA4362	-1.87768	5.21103	1.78263e-61	1.34558e-60
gene106234	PA1732	-1.71709	4.45568	2.14709e-61	1.61849e-60
gene106128	PA1679	1.32187	6.27582	2.20796e-61	1.66211e-60
gene109859	PA3520	-2.49931	3.01353	2.27242e-61	1.70832e-60
gene108998	xcpX	-1.38126	5.23401	3.38979e-61	2.54486e-60
gene108690	PA2947	-1.95379	3.98488	3.69024e-61	2.76668e-60
gene103399	ilvA1	1.28441	7.67627	3.72789e-61	2.79114e-60
gene109008	xcpS	-1.23264	6.27842	4.21573e-61	3.15214e-60
gene110606	PA3893	2.11462	3.56151	4.39604e-61	3.28254e-60
gene106430	PA1825	-1.31769	5.27744	5.98053e-61	4.45968e-60
gene103817	PA0540	-1.75086	3.96809	6.6527e-61	4.95425e-60
gene108544	PA2874	-1.40429	5.49091	8.18945e-61	6.09049e-60
gene108540	PA2872	-1.644	5.47887	8.62482e-61	6.40569e-60
gene105048	PA1140	-1.31716	6.67407	9.09592e-61	6.74654e-60
gene104356	PA0803	-1.90357	3.89167	1.19108e-60	8.82256e-60
gene108364	cpg2	-1.84267	4.08696	1.21214e-60	8.96657e-60
gene103707	PA0485	1.35673	5.32405	1.41363e-60	1.04432e-59
gene111830	PA4496	-2.05422	8.67158	1.57019e-60	1.15843e-59
gene110490	PA3835	-2.18707	3.1569	1.6627e-60	1.22506e-59
gene108602	cobJ	-1.40326	5.87298	1.80458e-60	1.32783e-59
gene108578	atuF	-1.83026	5.21081	2.07938e-60	1.528e-59
gene109671	PA3426	-1.38641	5.42709	2.59979e-60	1.90789e-59
gene110065	PA3623	-1.43004	9.83353	4.39949e-60	3.22435e-59
gene107258	pslI	-1.3665	5.51881	4.73644e-60	3.46672e-59
gene110754	PA3967	1.83644	4.24243	6.13538e-60	4.48473e-59
gene111844	PA4503	-1.36998	6.01788	7.68523e-60	5.61022e-59
gene107882	PA2552	-1.83473	7.42577	7.71684e-60	5.62589e-59
gene102883	pppA	1.46451	5.15189	1.08064e-59	7.86794e-59
gene102913	clpV1	1.54424	7.98698	1.17446e-59	8.53985e-59
gene108494	ohr	1.92721	4.25954	1.38921e-59	1.00881e-58
gene103085	aer2	-1.82561	7.52827	1.44708e-59	1.04946e-58
gene103829	metK	-2.15044	9.31428	1.45345e-59	1.05271e-58
gene102881	ppkA	1.34891	7.27121	1.81705e-59	1.31434e-58
gene103853	PA0558	-1.33375	5.83618	1.98897e-59	1.43682e-58
gene103863	PA0563	1.74193	7.79958	2.10847e-59	1.52117e-58
gene106154	PA1692	2.86431	2.3676	2.24718e-59	1.61914e-58
gene106948	PA2084	-1.57067	4.543	2.5425e-59	1.82955e-58
gene103093	cttP	-1.32442	7.00641	2.75375e-59	1.97899e-58
gene110400	PA3791	1.37647	6.54273	3.20891e-59	2.30311e-58
gene103503	PA0383	-1.57767	4.42256	5.95115e-59	4.26576e-58
gene277685	PA2794	-1.44099	4.70215	6.30798e-59	4.5157e-58
gene111130	PA4155	-2.02207	3.02915	7.99645e-59	5.70969e-58
gene113120	ntrC	1.42353	5.70962	7.98712e-59	5.70969e-58
gene111460	PA4311	-1.23614	6.14039	8.73299e-59	6.22758e-58
gene110696	PA3938	2.61654	3.20093	9.83615e-59	7.00526e-58
gene103367	PA0315	-1.58559	8.08521	1.03481e-58	7.3604e-58
gene110826	pbpA	1.21116	6.87517	1.33573e-58	9.48865e-58
gene102919	PA0093	1.65329	5.62609	1.44781e-58	1.02717e-57
gene104352	PA0801	-1.58743	5.01458	1.79946e-58	1.27502e-57
gene113284	PA5205	-1.4236	4.86742	2.04317e-58	1.44586e-57
gene110686	PA3933	-1.39204	6.43163	2.26275e-58	1.5992e-57
gene107678	PA2450	-1.30371	6.08123	3.32444e-58	2.34657e-57
gene104185	PA0718	2.82869	2.44343	3.39984e-58	2.39674e-57
gene104013	PA0637	2.23696	3.99781	4.99674e-58	3.51801e-57
gene109711	PA3446	2.41653	3.80815	5.0325e-58	3.53869e-57
gene108568	atuA	-1.58594	5.45085	5.39777e-58	3.79074e-57
gene110203	lptF	-1.48859	9.27039	1.01005e-57	7.08442e-57
gene106172	pcr3	4.05338	2.20007	1.06768e-57	7.47913e-57
gene111108	PA4144	-2.49977	3.0371	1.12179e-57	7.84825e-57
gene110464	tgt	1.23095	7.0662	1.23576e-57	8.63472e-57
gene113142	PA5136	1.20972	6.9299	1.34906e-57	9.41454e-57
gene113072	PA5101	-2.31112	4.11911	2.08992e-57	1.45665e-56
gene106594	PA1907	-3.01912	1.77664	2.33588e-57	1.62603e-56
gene111582	PA4372	-1.27019	7.4251	3.42095e-57	2.37838e-56
gene105510	PA1371	-1.40278	5.78068	3.91007e-57	2.71503e-56
gene106300	PA1765	-1.67755	4.10295	4.76528e-57	3.30472e-56
gene109076	PA3133.3	2.05374	5.25494	6.11262e-57	4.23381e-56
gene111674	ftsI	1.43313	8.60207	6.48066e-57	4.48313e-56
gene111672	murE	1.29959	8.72297	7.04403e-57	4.86678e-56
gene104734	pyoS5	-1.95248	6.81453	7.13195e-57	4.9214e-56
gene107180	PA2200	-1.17674	5.9601	7.70073e-57	5.30728e-56
gene108650	PA2927	-1.51676	4.59049	9.48603e-57	6.52959e-56
gene103993	PA0627	2.13925	3.18995	1.16711e-56	8.02372e-56
gene106314	PA1772	-1.31561	8.56721	1.24522e-56	8.55008e-56
gene108582	atuH	-1.55323	4.46393	1.27041e-56	8.71231e-56
gene105418	PA1325	2.08421	4.51886	1.46075e-56	1.00052e-55
gene107896	PA2559	-1.34944	6.65675	1.66012e-56	1.13568e-55
gene106074	PA1652	-1.55157	5.17639	1.77989e-56	1.21611e-55
gene112086	PA4619	1.58837	5.11635	1.78926e-56	1.22101e-55
gene110850	PA4015	-1.34122	7.04326	3.45961e-56	2.35798e-55
gene103909	PA0585	-1.90643	3.5628	3.59717e-56	2.44872e-55
gene105964	PA1597	-2.30217	6.6084	4.34443e-56	2.95379e-55
gene105104	PA1168	-3.37011	2.38024	5.37334e-56	3.64888e-55
gene109987	glpD	-1.67648	6.23507	1.29082e-55	8.75485e-55
gene104047	speD	1.50349	7.59081	1.54226e-55	1.04474e-54
gene104326	PA0788	-1.61197	5.16529	2.29307e-55	1.55146e-54
gene111372	secE	1.59181	8.41152	2.36799e-55	1.60019e-54
gene107068	glgP	-1.96975	3.7904	6.16323e-55	4.1598e-54
gene106260	PA1745	-1.5397	4.71695	6.45761e-55	4.3532e-54
gene104444	cerN	-2.68806	2.64596	7.67533e-55	5.16781e-54
gene105974	PA1602	2.86672	2.47071	9.44586e-55	6.35219e-54
gene104023	PA0642	2.49014	3.81064	9.99248e-55	6.71166e-54
gene106672	rbsB	1.2816	7.31558	1.02028e-54	6.84463e-54
gene108338	PA2775	1.52327	5.28106	2.17616e-54	1.45813e-53
gene111606	PA4384	-1.89196	3.4745	4.09816e-54	2.74265e-53
gene104642	PA0940	-1.60974	3.76021	6.61139e-54	4.41928e-53
gene110326	PA3754	1.33588	6.96443	6.71998e-54	4.48646e-53
gene104039	trpD	1.46484	7.88292	8.13734e-54	5.4262e-53
gene104548	aruG	1.30116	8.05654	8.70481e-54	5.79763e-53
gene112272	PA4706	-1.45079	4.50285	8.9552e-54	5.95725e-53
gene107360	gcd	-1.39591	7.73669	1.18243e-53	7.85645e-53
gene112300	trmA	1.25616	6.53746	1.52046e-53	1.00903e-52
gene106486	PA1853	-1.26322	5.55152	1.55735e-53	1.03228e-52
gene106368	PA1796.3	2.03989	3.4911	1.89407e-53	1.25397e-52
gene106144	speE	1.19736	6.68988	2.36029e-53	1.56077e-52
gene104552	aruB	1.32983	8.88875	2.38765e-53	1.57698e-52
gene102989	PA0128	1.70391	5.40326	2.68062e-53	1.76838e-52
gene110242	PA3712	-1.95176	8.29519	2.99589e-53	1.97402e-52
gene113052	hutG	-1.67137	5.63723	3.24394e-53	2.13492e-52
gene113068	PA5099	-4.38145	3.73687	3.43705e-53	2.25933e-52
gene110716	rocA1	1.22989	6.49939	3.45995e-53	2.27169e-52
gene109014	xcpQ	-1.36032	8.2802	3.64866e-53	2.39276e-52
gene107968	PA2592	-1.27729	7.87713	3.74022e-53	2.44991e-52
gene112440	PA4788	-1.67869	3.81955	3.87995e-53	2.53844e-52
gene106048	PA1639	1.36453	5.84626	3.93819e-53	2.57351e-52
gene104358	PA0804	-1.36067	5.68171	4.8843e-53	3.18801e-52
gene105794	PA1513	-1.34695	5.44465	5.12166e-53	3.33901e-52
gene107708	PA2465	-2.84748	1.77497	5.6927e-53	3.70694e-52
gene103603	PA0433	-1.82567	3.96126	9.96131e-53	6.47894e-52
gene111798	mreC	1.25977	6.91767	1.21361e-52	7.88421e-52
gene107020	PA2120	-1.76672	3.71105	1.35941e-52	8.82107e-52
gene105892	aer	1.59678	8.76375	1.64656e-52	1.06718e-51
gene103859	PA0561	1.37501	4.66915	2.54944e-52	1.65044e-51
gene109349	capB	1.44027	8.75085	2.60406e-52	1.68383e-51
gene112430	PA4783	1.61783	4.79974	4.76162e-52	3.07537e-51
gene106798	hmgA	1.49594	8.55889	4.90547e-52	3.1646e-51
gene104157	PA0704	-1.24283	5.36805	6.59078e-52	4.24688e-51
gene110296	PA3739	-1.28704	5.79917	8.01527e-52	5.15879e-51
gene104896	PA1065	-1.43599	4.73839	8.35327e-52	5.37009e-51
gene109735	PA3458	1.5663	7.44769	8.44068e-52	5.42001e-51
gene111724	cysD	1.53908	6.89284	1.22964e-51	7.88677e-51
gene112096	cdrB	-1.3514	5.22866	1.24011e-51	7.9447e-51
gene113236	PA5181	-2.16764	4.08952	1.30926e-51	8.37803e-51
gene106076	PA1653	1.79639	3.78064	1.32172e-51	8.44802e-51
gene109521	PA3352	1.23581	8.25863	1.79651e-51	1.14695e-50
gene105224	PA1228	2.28496	3.3819	2.01674e-51	1.28608e-50
gene109475	PA3329	-2.49931	7.47834	2.08067e-51	1.32532e-50
gene106156	pscR	1.50725	4.3883	2.2474e-51	1.42988e-50
gene107442	PA2331	-1.38164	4.55967	2.99698e-51	1.90461e-50
gene108354	PA2782	-2.15975	3.37884	4.02504e-51	2.55503e-50
gene113888	PA5502	-1.24891	5.69581	4.53788e-51	2.87728e-50
gene107084	PA2152	-1.80358	4.07302	5.04157e-51	3.193e-50
gene105430	PA1331	-3.61479	6.28477	5.75656e-51	3.64166e-50
gene102921	PA0094	1.47	5.83451	5.99385e-51	3.78745e-50
gene107160	PA2190	-1.8266	3.91556	6.07096e-51	3.83182e-50
gene108092	PA2653	1.36499	4.94478	7.78681e-51	4.90923e-50
gene107648	PA2435	-1.37977	5.64753	9.14433e-51	5.75854e-50
gene105584	PA1408	-1.27475	5.52361	9.65785e-51	6.07503e-50
gene111662	murG	1.21177	7.81351	9.75593e-51	6.12977e-50
gene104245	PA0747	-1.2253	7.41496	1.01647e-50	6.37937e-50
gene103959	prtN	1.43111	5.97315	1.12002e-50	7.02135e-50
gene111476	PA4319	1.32593	5.18703	1.123e-50	7.03205e-50
gene111580	PA4371	-1.34249	5.87427	1.13738e-50	7.1141e-50
gene108576	atuE	-2.11607	3.48908	1.64678e-50	1.02887e-49
gene105710	PA1471	-1.29918	5.38946	2.22e-50	1.38544e-49
gene113318	PA5222	1.20327	5.28272	2.4374e-50	1.5194e-49
gene110440	hscB	1.15625	7.36596	2.6119e-50	1.62635e-49
gene111870	PA4516	-1.57288	4.72157	2.83773e-50	1.76499e-49
gene107434	PA2327	-1.69376	3.84413	3.51705e-50	2.18506e-49
gene102991	bauD	1.99223	5.1643	3.73472e-50	2.3177e-49
gene110552	PA3866	-1.50703	7.99159	3.9736e-50	2.46319e-49
gene105158	PA1195	-1.91049	4.72913	4.16343e-50	2.57798e-49
gene110278	PA3730	1.37764	6.3347	4.43788e-50	2.74485e-49
gene108218	PA2716	-1.45073	4.64944	5.79899e-50	3.58271e-49
gene107096	PA2158	-2.07078	2.65642	6.83792e-50	4.21989e-49
gene109477	PA3330	-2.7277	7.53007	7.90889e-50	4.87539e-49
gene105172	PA1202	-1.26177	7.5472	8.11688e-50	4.99805e-49
gene109547	PA3365	2.06697	6.03976	1.15275e-49	7.09033e-49
gene110304	trmD	1.4587	9.47201	1.16851e-49	7.17926e-49
gene133898	gidB	1.151	6.89084	1.29176e-49	7.92775e-49
gene112193	PA4672	1.20813	6.51309	1.46101e-49	8.95655e-49
gene104316	putP	1.44987	8.89252	1.48848e-49	9.1149e-49
gene112718	PA4926	-1.32987	4.4878	1.50381e-49	9.19863e-49
gene113804	PA5460	-2.03804	4.12289	1.65396e-49	1.01059e-48
gene110023	PA3602	1.66416	7.01299	2.35835e-49	1.4394e-48
gene112750	PA4940	1.47984	5.11898	2.57742e-49	1.57137e-48
gene110520	PA3850	1.13872	7.03874	2.65653e-49	1.61783e-48
gene103467	PA0365	-1.63829	4.377	2.87802e-49	1.7508e-48
gene105342	PA1287	-1.13502	6.17459	3.01983e-49	1.83505e-48
gene104492	pbpG	1.35629	6.1721	3.49541e-49	2.12172e-48
gene113066	hutH	-3.57589	4.42244	4.54589e-49	2.75635e-48
gene109167	PA3177	-1.24659	5.00408	5.22381e-49	3.16394e-48
gene108694	PA2949	-1.2152	5.08325	7.40707e-49	4.4814e-48
gene103831	PA0547	-1.35882	6.85425	9.25101e-49	5.59091e-48
gene105144	PA1188	-1.29447	5.22246	1.18699e-48	7.16587e-48
gene113892	PA5504	1.24444	6.28534	1.41921e-48	8.55845e-48
gene113890	PA5503	1.20557	6.37008	1.63455e-48	9.84635e-48
gene103491	PA0377	-1.22399	5.32698	1.64235e-48	9.88259e-48
gene105872	PA1551	1.41159	9.00451	2.02994e-48	1.22016e-47
gene107280	lpdV	-1.36692	9.90164	2.12071e-48	1.27334e-47
gene107738	PA2480	-1.34638	4.58935	2.56859e-48	1.5406e-47
gene103017	PA0142	1.34946	4.94914	2.78769e-48	1.67021e-47
gene113546	gmk	1.33905	6.28298	2.99891e-48	1.79482e-47
gene112352	PA4746	1.38727	7.02713	3.09084e-48	1.84784e-47
gene112187	PA4669.1	1.58878	6.98494	3.90739e-48	2.3335e-47
gene109503	PA3343	1.29847	6.58317	4.02881e-48	2.40343e-47
gene113538	crc	1.45612	8.58545	4.58389e-48	2.73163e-47
gene107440	PA2330	-1.48828	4.71342	6.49548e-48	3.86662e-47
gene105288	PA1260	-2.76074	2.20982	6.74374e-48	4.0101e-47
gene107660	PA2441	-2.57034	3.06436	7.19102e-48	4.27149e-47
gene110121	cdsA	1.13384	7.02566	8.00437e-48	4.74955e-47
gene105034	PA1133	-1.75476	3.17259	8.20436e-48	4.86301e-47
gene107256	pslH	-1.07954	5.94572	8.48243e-48	5.02247e-47
gene104187	PA0719	2.08547	3.17426	1.29269e-47	7.64587e-47
gene110544	dauB	1.53014	4.58882	1.40223e-47	8.28493e-47
gene111746	PA4454	1.13439	7.44376	1.47289e-47	8.69319e-47
gene106722	braZ	2.09599	3.06036	1.47588e-47	8.70158e-47
gene113634	betT1	-2.14807	5.47434	1.71996e-47	1.01299e-46
gene112356	PA4746.2	1.9384	6.01475	1.85561e-47	1.09172e-46
gene108524	PA2864	-1.09436	6.13312	2.7901e-47	1.63978e-46
gene111282	pchA	-1.674	7.46759	3.42231e-47	2.00921e-46
gene109395	PA3289	-1.37785	4.29179	4.94106e-47	2.89778e-46
gene112264	PA4702	-1.76564	4.31249	5.24119e-47	3.07055e-46
gene134020	recF	1.33788	8.20877	5.29597e-47	3.09937e-46
gene111584	PA4373	-1.1044	7.30708	5.70457e-47	3.33498e-46
gene103895	PA0578	1.23786	7.01973	7.90061e-47	4.61395e-46
gene113790	gmd	-1.27264	7.55207	9.72442e-47	5.67309e-46
gene105922	PA1576	-1.11249	6.30155	1.1069e-46	6.45074e-46
gene109617	PA3399	-1.14544	5.47529	1.16295e-46	6.77027e-46
gene105820	PA1526	1.32179	6.35395	1.35783e-46	7.89651e-46
gene102885	tagF1	1.34055	5.43523	1.52944e-46	8.88514e-46
gene107556	fpvR	-1.19332	7.38443	1.73431e-46	1.00648e-45
gene107036	cupA1	1.42901	4.98445	1.8757e-46	1.0874e-45
gene105484	PA1358	-1.54016	4.32888	2.09062e-46	1.21073e-45
gene105434	PA1333	-1.77649	3.52908	2.15524e-46	1.24685e-45
gene111670	murF	1.17412	8.46744	2.30018e-46	1.32931e-45
gene134048	fmt	1.16581	6.06534	3.11423e-46	1.79789e-45
gene110011	PA3596	-1.80804	3.3063	3.34657e-46	1.93002e-45
gene113054	hutI	-1.465	5.38493	4.24764e-46	2.44713e-45
gene113164	mutM	1.07213	7.30807	4.94404e-46	2.84539e-45
gene108336	PA2774	1.18706	5.72364	5.77707e-46	3.32137e-45
gene103031	PA0149	-2.23465	2.90465	6.20773e-46	3.56527e-45
gene106840	PA2030	-1.76579	3.37985	8.41635e-46	4.82874e-45
gene104594	kup	-1.02824	6.54487	8.95207e-46	5.13079e-45
gene111510	PA4336	-1.15081	5.9718	9.24934e-46	5.2957e-45
gene106152	pscT	2.51437	2.13651	9.34537e-46	5.34517e-45
gene111796	mreD	1.12799	5.38942	9.43492e-46	5.39083e-45
gene134046	PA0017	1.06932	6.3813	1.13677e-45	6.48849e-45
gene110662	PA3921	-1.20572	7.99262	1.14801e-45	6.5459e-45
gene110650	moaB1	1.76796	3.80127	2.27777e-45	1.29744e-44
gene103879	PA0571	-1.22254	5.3876	2.29716e-45	1.30714e-44
gene106668	PA1944	-1.04878	6.44906	2.61688e-45	1.48755e-44
gene107732	PA2477	-1.73961	3.5597	2.93119e-45	1.66451e-44
gene104233	PA0741	-1.52871	3.81876	3.5357e-45	2.00573e-44
gene107886	PA2554	-1.48041	6.08861	5.01073e-45	2.83959e-44
gene113854	ampDh2	-1.06857	5.84462	5.25696e-45	2.97608e-44
gene109681	PA3431	2.7322	4.39453	5.55477e-45	3.14148e-44
gene105364	PA1298	2.1353	3.5943	5.58462e-45	3.15514e-44
gene112890	waaG	1.06763	7.33093	5.6758e-45	3.20339e-44
gene112876	PA5003	1.16298	7.05025	6.13419e-45	3.45859e-44
gene110019	PA3600	-2.53642	1.95298	6.21911e-45	3.5029e-44
gene104029	PA0645	1.72722	3.609	6.35987e-45	3.57856e-44
gene109050	PA3123	-1.07276	6.30247	9.34201e-45	5.25121e-44
gene111240	phzA1	-2.17218	3.95978	9.93537e-45	5.57909e-44
gene109335	PA3261	-1.19281	5.44325	1.05349e-44	5.9098e-44
gene106006	PA1618	-1.13443	6.22976	1.23045e-44	6.89548e-44
gene110286	PA3734	-1.79806	3.61691	1.35799e-44	7.60255e-44
gene103249	PA0257	1.76345	4.31458	1.42616e-44	7.97616e-44
gene106858	PA2039	1.91232	3.51809	1.96571e-44	1.09826e-43
gene106874	PA2047	-1.42852	4.32143	2.13478e-44	1.19153e-43
gene107890	PA2556	-1.32212	5.38268	2.2808e-44	1.27175e-43
gene113874	thrB	1.10958	7.55202	2.55314e-44	1.42217e-43
gene110842	PA4011	1.08808	7.18606	2.85889e-44	1.59088e-43
gene106082	hsiA2	1.2521	8.00534	4.58762e-44	2.55031e-43
gene112484	fdhE	1.59827	5.03423	5.3834e-44	2.9897e-43
gene111132	PA4156	-2.05088	3.11931	6.62045e-44	3.67302e-43
gene103639	PA0451	-1.42525	5.55581	6.66732e-44	3.69534e-43
gene104041	trpC	1.2554	7.60634	7.10546e-44	3.93424e-43
gene111474	PA4318	1.21575	5.9847	7.85623e-44	4.3456e-43
gene107884	PA2553	-1.75363	7.72293	9.47988e-44	5.23848e-43
gene109793	pldA	1.32452	7.17217	1.16399e-43	6.42569e-43
gene105926	PA1578	-1.21784	4.80723	1.6808e-43	9.26946e-43
gene109519	flgM	1.17799	8.57722	2.13842e-43	1.17815e-42
gene103393	aaaA	-1.49017	6.97586	2.44653e-43	1.34656e-42
gene111656	ftsQ	1.08175	7.55274	3.45723e-43	1.90096e-42
gene102887	icmF1	1.09719	8.02328	3.86453e-43	2.12281e-42
gene111884	PA4523	-1.18585	9.95337	4.95477e-43	2.719e-42
gene113326	PA5226	1.5033	5.35863	5.05211e-43	2.76967e-42
gene113774	PA5445	-2.0996	7.31028	5.51219e-43	3.01892e-42
gene106802	liuE	-1.32098	7.64958	5.6501e-43	3.0914e-42
gene110578	narL	1.24665	7.2908	5.86595e-43	3.20633e-42
gene109655	ldh	-1.51273	6.70437	6.09053e-43	3.32582e-42
gene109871	PA3526	1.18378	6.87599	8.0385e-43	4.38521e-42
gene106038	kdpB	2.54248	3.95401	8.37203e-43	4.56268e-42
gene104412	PA0829	-1.65255	3.40017	1.03607e-42	5.64095e-42
gene106174	pcr4	3.77761	1.13659	1.12628e-42	6.12607e-42
gene111242	phzB1	-3.67725	7.86279	1.19806e-42	6.51011e-42
gene112700	PA4917	1.31772	6.87803	1.23574e-42	6.7083e-42
gene113064	PA5097	-3.1709	4.03584	1.43817e-42	7.79956e-42
gene103931	PA0596	1.06582	7.28278	1.53776e-42	8.33151e-42
gene112076	mscL	-1.25874	8.63683	2.11828e-42	1.14656e-41
gene109709	PA3445	2.94864	2.55211	2.28343e-42	1.23474e-41
gene109203	gapA	2.1195	6.36448	2.58057e-42	1.39406e-41
gene109797	PA3489	1.3211	4.60557	2.96257e-42	1.59886e-41
gene112211	PA4680	-2.09205	2.24952	3.05244e-42	1.64576e-41
gene112992	PA5061	-1.1678	7.67273	3.87926e-42	2.08953e-41
gene106506	modA	-2.05079	6.3381	4.13945e-42	2.22751e-41
gene111462	PA4312	-1.22995	5.34868	4.61562e-42	2.48134e-41
gene111408	recC	1.06605	8.03537	5.04075e-42	2.70727e-41
gene104972	PA1103	1.0789	6.56637	5.64806e-42	3.03051e-41
gene102815	PA0041	1.07638	7.94339	5.91239e-42	3.16927e-41
gene113106	thiI	1.18282	7.11842	6.95872e-42	3.72654e-41
gene112982	phaC1	-1.02486	7.21253	8.76399e-42	4.68878e-41
gene104936	flgJ	1.12026	7.34145	9.83756e-42	5.25807e-41
gene107646	PA2434	-1.62126	3.59101	1.10352e-41	5.89251e-41
gene103431	glpQ	-1.63578	3.59461	1.31195e-41	6.99873e-41
gene112878	PA5004	1.12639	8.25035	1.40175e-41	7.47063e-41
gene106530	PA1875	-1.39188	4.05753	1.706e-41	9.08338e-41
gene108306	PA2759	-1.74355	3.65488	2.07805e-41	1.10537e-40
gene105468	PA1350	-1.56193	3.81443	2.48488e-41	1.32051e-40
gene107262	pslK	-1.2507	4.37631	3.1477e-41	1.67114e-40
gene112314	pcnB	1.08431	8.2597	3.34367e-41	1.77349e-40
gene103395	PA0329	-1.15327	8.07103	5.23665e-41	2.77487e-40
gene113448	amtB	1.06779	6.54362	5.68363e-41	3.00885e-40
gene111290	ftnA	1.19865	8.03639	5.76522e-41	3.04914e-40
gene103303	sbp	1.80162	5.2113	6.49474e-41	3.4317e-40
gene111782	pmbA	-1.21716	7.01014	6.51151e-41	3.43728e-40
gene104956	PA1095	1.04256	8.25939	7.35169e-41	3.87711e-40
gene110244	spdH	1.25923	5.73086	8.23452e-41	4.33857e-40
gene110163	PA3672	-1.33951	6.72953	1.13849e-40	5.99276e-40
gene106756	pqqD	-1.98046	2.60494	1.14141e-40	6.00241e-40
gene108054	aceA	-1.37043	9.58512	1.20702e-40	6.34143e-40
gene112016	PA4584	1.26127	4.65291	1.46741e-40	7.70214e-40
gene103819	PA0541	1.09647	6.62566	1.47471e-40	7.73316e-40
gene112618	osmE	-1.24362	7.36216	1.66213e-40	8.70772e-40
gene110546	dauA	1.37985	4.20299	1.76078e-40	9.21585e-40
gene112175	hemK	1.06971	6.52659	1.79329e-40	9.37714e-40
gene102873	tagQ1	1.13132	9.7519	1.85382e-40	9.68456e-40
gene108230	PA2722	-1.64189	3.38189	2.10914e-40	1.1008e-39
gene106436	PA1828	-1.07233	6.91343	2.1653e-40	1.12905e-39
gene111044	PA4112	-1.13392	6.93348	2.16747e-40	1.12912e-39
gene111214	bfiS	1.03595	5.54896	2.17472e-40	1.13183e-39
gene109078	PA3133.4	1.51934	5.30282	2.20232e-40	1.14512e-39
gene105672	flhA	1.0067	7.36565	2.48843e-40	1.29268e-39
gene113766	PA5441	1.05245	8.50148	2.51832e-40	1.30698e-39
gene105004	PA1118	-1.21742	5.47053	2.84624e-40	1.47579e-39
gene110185	PA3683	1.19833	5.62404	2.9512e-40	1.52878e-39
gene108988	PA3094.1	1.35812	5.98534	3.88912e-40	2.01277e-39
gene109479	PA3331	-2.85708	8.49228	4.99812e-40	2.5843e-39
gene112098	cdrA	-1.21267	5.91094	5.4782e-40	2.82989e-39
gene105560	PA1396	1.29588	5.10317	6.31534e-40	3.2593e-39
gene108356	PA2783	-2.03772	2.86953	6.68312e-40	3.44591e-39
gene103055	PA0161	2.54127	3.08873	6.86065e-40	3.53416e-39
gene111718	PA4440	1.02386	6.52966	6.92515e-40	3.56407e-39
gene108554	PA2879	1.38618	5.24601	7.71536e-40	3.96708e-39
gene113144	PA5137	-1.15808	7.4262	8.12601e-40	4.17436e-39
gene104958	PA1096	1.04992	8.11437	8.59146e-40	4.40938e-39
gene113588	PA5357	1.24916	5.20412	9.06994e-40	4.64635e-39
gene112088	PA4620	1.56799	3.827	9.78071e-40	5.00585e-39
gene104530	aotJ	-1.24688	9.53474	1.05263e-39	5.38246e-39
gene103441	PA0352	1.18484	5.75409	1.10558e-39	5.64802e-39
gene106554	PA1887	-2.27586	3.22853	1.1575e-39	5.90782e-39
gene112358	secG	1.276	8.47787	1.35902e-39	6.92999e-39
gene109165	gltS	-2.18299	2.82702	1.71068e-39	8.71521e-39
gene106446	PA1833	-1.03823	8.34031	1.73287e-39	8.82016e-39
gene109417	fadD2	-1.09968	6.96483	1.88918e-39	9.60695e-39
gene111974	PA4564	1.02127	6.38387	2.09911e-39	1.06647e-38
gene103087	PA0177	-1.0531	5.25948	2.5878e-39	1.31355e-38
gene112840	PA4985	2.01927	2.78247	2.66871e-39	1.35338e-38
gene109401	PA3292	2.04162	2.71059	2.67588e-39	1.35578e-38
gene103885	PA0574	1.23547	5.94967	2.72715e-39	1.38049e-38
gene107082	PA2151	-1.7963	3.34112	2.79369e-39	1.41289e-38
gene106508	PA1864	-2.82329	3.86664	2.90117e-39	1.46591e-38
gene106810	liuA	-1.66127	9.25495	3.54527e-39	1.78973e-38
gene108542	tgpA	-1.03638	6.11576	3.57134e-39	1.80125e-38
gene111374	PA4276.1	1.27811	6.80483	4.07929e-39	2.05557e-38
gene105432	PA1332	-1.83999	2.86358	4.2539e-39	2.14162e-38
gene106456	cysI	1.40218	7.35516	4.56642e-39	2.29687e-38
gene111508	PA4335	-1.04104	5.28651	5.30788e-39	2.6674e-38
gene112185	ipk	1.60202	8.33131	6.10346e-39	3.06443e-38
gene104051	PA0656	-1.1141	5.62553	6.77943e-39	3.40075e-38
gene109056	ibpA	-1.91696	8.29283	7.87192e-39	3.9452e-38
gene113802	PA5459	-1.32032	5.49963	8.56956e-39	4.29097e-38
gene112348	infB	1.05124	11.3694	1.05951e-38	5.30041e-38
gene102811	PA0039	-1.22121	9.65299	1.12432e-38	5.61959e-38
gene104942	PA1088	1.01858	7.01171	1.63249e-38	8.13751e-38
gene112177	prfA	1.08242	7.05314	1.67678e-38	8.35078e-38
gene112706	nadE	1.3672	8.90838	1.75842e-38	8.7495e-38
gene104644	PA0941	-1.44568	3.61437	1.8265e-38	9.08013e-38
gene103235	PA0250	-1.11085	6.10065	1.86154e-38	9.24603e-38
gene107934	PA2577	1.12668	5.35644	2.02047e-38	1.00175e-37
gene104570	PA0905.3	1.80203	5.7506	2.10799e-38	1.04421e-37
gene111976	proB	1.0363	8.11686	2.18797e-38	1.08286e-37
gene104528	acsA	-2.91809	9.64524	2.28634e-38	1.13053e-37
gene112806	PA4968	1.04866	6.41128	2.57252e-38	1.27091e-37
gene105708	PA1470	-1.28798	4.72093	2.62551e-38	1.29594e-37
gene103837	PA0550	-1.39535	4.50036	2.65741e-38	1.31052e-37
gene109523	PA3353	1.15353	7.89959	2.78063e-38	1.37007e-37
gene110099	dnaE	1.07349	9.42792	2.99466e-38	1.47421e-37
gene107248	pslD	-1.21969	6.46445	3.77624e-38	1.85732e-37
gene110394	PA3788	-1.26241	4.68227	5.71344e-38	2.80763e-37
gene108844	PA3024	-1.08444	5.25886	6.61705e-38	3.24592e-37
gene110035	potB	2.51159	2.00001	6.70653e-38	3.28691e-37
gene105930	gltA	-1.13215	10.0851	6.93982e-38	3.39824e-37
gene112646	desT	1.31502	5.10043	7.80325e-38	3.81767e-37
gene102851	osmC	-1.35702	5.80851	8.29455e-38	4.05446e-37
gene111376	tufB	1.221	8.54986	8.54025e-38	4.17089e-37
gene110077	adhC	-1.27317	8.08189	9.62032e-38	4.69012e-37
gene111810	PA4486	-1.06612	5.3767	1.00537e-37	4.89711e-37
gene107508	PA2364	-1.33497	4.9227	1.13975e-37	5.5468e-37
gene111090	PA4135	-1.03928	5.43922	1.59079e-37	7.73507e-37
gene111658	ddlB	1.00405	7.98048	1.84901e-37	8.98278e-37
gene113394	hemC	1.01439	8.05866	2.14568e-37	1.04149e-36
gene109072	PA3133.1	2.53265	2.9451	2.26602e-37	1.09894e-36
gene113312	PA5219	-1.37292	3.6033	2.3934e-37	1.1597e-36
gene112842	PA4986	1.75122	3.23669	2.47108e-37	1.1963e-36
gene106604	femI	-1.26612	4.32668	2.85705e-37	1.38195e-36
gene108016	ftsK	1.05528	8.86699	3.15058e-37	1.5226e-36
gene104872	PA1053	1.0302	9.74528	3.56827e-37	1.72296e-36
gene111676	ftsL	1.33011	5.45869	3.65971e-37	1.76557e-36
gene108746	rluC	1.11848	6.85221	4.32162e-37	2.08309e-36
gene104274	algU	1.29875	8.7571	4.67053e-37	2.24931e-36
gene106764	ercS	-1.11721	5.18425	4.89401e-37	2.3549e-36
gene111142	fepG	-2.61089	1.3616	5.09361e-37	2.44882e-36
gene110822	sltB1	1.04644	7.61589	5.67383e-37	2.7254e-36
gene113576	rubA1	1.4544	5.39697	5.68773e-37	2.72972e-36
gene105000	PA1116	1.12508	5.31604	7.01568e-37	3.36413e-36
gene107918	lecA	-2.25359	2.40661	9.32123e-37	4.46582e-36
gene110466	queA	1.08756	5.69428	1.01189e-36	4.84382e-36
gene112770	PA4950	1.05134	5.90311	1.17282e-36	5.60932e-36
gene104922	flgC	1.02254	5.6661	1.32261e-36	6.3203e-36
gene113782	wbpX	-1.05697	6.28814	1.43779e-36	6.86477e-36
gene111174	PA4177	-2.15506	2.12577	1.62145e-36	7.72837e-36
gene110636	PA3908	-1.11247	6.73667	1.67647e-36	7.98372e-36
gene160433	rsmY	-1.65077	5.61367	1.73023e-36	8.23271e-36
gene102889	tssL1	1.00411	6.35725	1.9491e-36	9.26615e-36
gene113788	wbpW	-1.13626	7.35199	2.10776e-36	1.00118e-35
gene108046	PA2630	1.02514	6.90056	2.34095e-36	1.111e-35
gene108428	PA2819.1	1.66568	5.40339	2.36037e-36	1.11926e-35
gene110250	PA3716	1.11167	8.52729	2.74185e-36	1.29904e-35
gene103857	PA0560	1.26286	4.51648	2.83455e-36	1.34182e-35
gene110270	PA3726	1.11344	4.9261	3.15432e-36	1.49191e-35
gene111646	PA4404	-1.11609	7.57641	3.49135e-36	1.64991e-35
gene134014	PA0006	1.19602	5.7558	4.19398e-36	1.98027e-35
gene105740	bapF	-1.38531	3.62841	4.54209e-36	2.14282e-35
gene113826	PA5471	1.12387	6.32267	4.75263e-36	2.24024e-35
gene104001	PA0631	2.10599	2.21811	5.42849e-36	2.55665e-35
gene103297	cysA	1.71838	5.90045	6.33194e-36	2.97961e-35
gene110508	PA3844	-1.2672	4.60344	7.04808e-36	3.31379e-35
gene113554	PA5340	-1.68286	7.325	8.23037e-36	3.86639e-35
gene108334	PA2773	1.63161	3.70814	8.31816e-36	3.90433e-35
gene110061	fdxA	1.59364	5.8145	9.25932e-36	4.34241e-35
gene107252	pslF	-1.03576	5.88284	9.26879e-36	4.34318e-35
gene111666	murD	1.10469	8.61699	9.67524e-36	4.52981e-35
gene111660	murC	1.00852	8.79129	1.23748e-35	5.78394e-35
gene107416	PA2318	-1.21952	4.03339	1.65501e-35	7.71596e-35
gene108060	nuoA	1.05004	7.04056	1.65443e-35	7.71596e-35
gene103021	PA0144	-1.62582	3.34807	1.68141e-35	7.83245e-35
gene102895	fha1	1.08628	7.40248	1.81868e-35	8.46478e-35
gene107700	PA2461	1.20892	4.94551	2.70606e-35	1.25844e-34
gene102899	tssB1	1.01972	7.95726	2.94512e-35	1.36733e-34
gene108538	PA2871	-1.05956	5.98401	3.31032e-35	1.53559e-34
gene104266	PA0758	1.11717	6.91349	4.33153e-35	2.00763e-34
gene103417	PA0340	1.2709	4.53301	6.85287e-35	3.16831e-34
gene107250	pslE	-1.25584	8.10425	9.35955e-35	4.32003e-34
gene106938	PA2079	-1.33658	5.35057	1.22424e-34	5.63661e-34
gene111654	ftsA	1.01147	8.84131	1.41255e-34	6.49819e-34
gene104248	PA0749	1.19548	4.9105	1.46056e-34	6.71351e-34
gene107260	pslJ	-1.08268	5.50491	1.86291e-34	8.55583e-34
gene110350	PA3766	2.08361	5.43258	2.25814e-34	1.03624e-33
gene104814	PA1024	-1.28653	4.53874	2.36449e-34	1.08415e-33
gene103305	PA0284	1.73565	3.58227	2.603e-34	1.19252e-33
gene106502	modC	-1.35139	5.87531	2.70881e-34	1.23998e-33
gene104822	PA1028	-1.20011	4.58229	3.06323e-34	1.40105e-33
gene111826	roxS	1.03789	8.02832	3.21141e-34	1.46762e-33
gene109391	PA3287	-1.54916	3.47637	3.58892e-34	1.63879e-33
gene102927	PA0097	1.10415	5.2035	3.80687e-34	1.73546e-33
gene112080	PA4616	1.24931	5.70477	4.05994e-34	1.8493e-33
gene113856	PA5486	-1.14934	5.04398	4.4247e-34	2.0138e-33
gene107632	PA2427	-5.22138	7.10001	5.0605e-34	2.30128e-33
gene108216	PA2715	-1.99913	2.39087	5.68227e-34	2.58192e-33
gene113134	PA5132	-1.36258	3.9215	5.96606e-34	2.70865e-33
gene106404	mltD	-1.03795	9.21485	6.5591e-34	2.97546e-33
gene105366	PA1299	1.18231	4.89747	6.65607e-34	3.01698e-33
gene113062	PA5096	-1.98746	4.27421	7.20479e-34	3.26303e-33
gene105830	ffs	1.26023	4.39151	8.28996e-34	3.74839e-33
gene108430	PA2819.2	1.63445	6.15792	8.49769e-34	3.83606e-33
gene105380	PA1306	1.09188	5.51081	8.56836e-34	3.86482e-33
gene108822	foaB	-1.24813	9.41708	9.83968e-34	4.43465e-33
gene104031	PA0646	1.6191	5.0619	1.02299e-33	4.60675e-33
gene110201	PA3691	-1.10859	8.43167	1.69221e-33	7.61425e-33
gene104838	PA1036	-1.01771	6.49403	1.72544e-33	7.75751e-33
gene110640	eddA	2.09311	3.73491	1.82172e-33	8.17711e-33
gene108154	PA2684	1.16825	8.70198	1.95594e-33	8.77248e-33
gene113688	PA5402	-1.39008	4.00721	2.31356e-33	1.0368e-32
gene108298	eco	1.04588	8.15369	2.35e-33	1.05228e-32
gene109363	PA3273	-1.22382	4.15367	2.41799e-33	1.08185e-32
gene113674	PA5395	-1.57167	3.27906	2.45437e-33	1.09725e-32
gene105852	PA1541	3.9159	1.10601	2.70961e-33	1.21038e-32
gene104812	PA1023	-1.35261	4.92741	2.98653e-33	1.33194e-32
gene109473	PA3328	-2.34046	7.49624	3.11221e-33	1.38687e-32
gene110039	potD	2.21788	2.9474	3.42674e-33	1.52458e-32
gene103279	PA0271	-1.08385	4.64815	4.49525e-33	1.99677e-32
gene112558	aroQ1	1.14326	6.53527	4.75706e-33	2.11137e-32
gene109939	fruA	1.09087	5.29066	5.5086e-33	2.44298e-32
gene110498	PA3839	1.0899	7.10613	5.6129e-33	2.48725e-32
gene107436	PA2328	-1.34302	3.82941	7.93357e-33	3.49884e-32
gene110037	potC	2.51928	1.73217	8.1714e-33	3.60087e-32
gene107116	PA2168	-2.46157	1.54045	8.53078e-33	3.75625e-32
gene104572	PA0906	1.32649	5.52574	9.12902e-33	4.01648e-32
gene107966	vqsR	-1.25031	6.91264	1.03134e-32	4.53397e-32
gene110109	fabZ	1.01996	7.74172	1.11527e-32	4.89133e-32
gene109339	PA3262.1	1.66685	5.36053	1.14602e-32	5.02223e-32
gene302417	crcZ	-1.14405	13.627	1.60499e-32	7.01695e-32
gene1077079	cgrB	1.36539	4.90775	1.91715e-32	8.37509e-32
gene112928	PA5029	1.06961	4.92454	2.20898e-32	9.63476e-32
gene104376	PA0813	-1.88537	3.33231	2.31084e-32	1.00711e-31
gene110570	narG	1.35735	5.70116	2.36396e-32	1.02945e-31
gene113974	PA5545	-1.14549	7.88558	2.38771e-32	1.03817e-31
gene104576	PA0908	2.36179	2.92943	2.47053e-32	1.07333e-31
gene111280	pchB	-1.43707	4.74651	2.67907e-32	1.16303e-31
gene111692	sspB	1.21411	6.90151	2.96966e-32	1.28817e-31
gene108006	PA2610	-1.29249	3.86559	3.31493e-32	1.43682e-31
gene108604	cobI	-1.0864	5.03958	4.18552e-32	1.81275e-31
gene106150	pscU	1.85022	2.59508	4.20438e-32	1.81949e-31
gene106454	PA1837	1.36452	5.50741	4.2177e-32	1.82384e-31
gene109765	PA3473	1.24379	4.02311	4.47543e-32	1.93377e-31
gene104846	PA1040	1.03921	5.29322	5.08167e-32	2.19231e-31
gene103585	mexR	1.14391	5.1624	5.11926e-32	2.20681e-31
gene109941	fruK	1.29679	4.55004	6.52089e-32	2.80666e-31
gene109275	PA3231	-1.68383	2.68608	6.63101e-32	2.85185e-31
gene111380	PA4277.2	1.50782	4.39147	7.33951e-32	3.15411e-31
gene107554	fpvI	-1.51362	5.54647	1.26165e-31	5.40932e-31
gene104282	mucD	-1.22474	9.84946	1.66059e-31	7.09781e-31
gene113412	PA5269	1.14417	5.65593	1.69827e-31	7.25326e-31
gene111866	PA4514	-1.17241	5.19773	2.38691e-31	1.01788e-30
gene105496	PA1364	-1.41369	3.23742	2.57385e-31	1.09675e-30
gene113496	PA5311	2.12026	4.38052	2.9248e-31	1.24438e-30
gene107056	PA2138	-1.45504	3.35724	2.94315e-31	1.25124e-30
gene107944	PA2581.1	1.79675	3.16757	3.44821e-31	1.46483e-30
gene109173	PA3180	-1.14048	4.66542	3.73427e-31	1.58392e-30
gene106996	PA2108	-1.37223	3.84331	3.90711e-31	1.65597e-30
gene102901	tssC1	1.08574	9.02472	3.94211e-31	1.66953e-30
gene106842	PA2031	-1.57757	2.72071	4.35489e-31	1.84294e-30
gene111276	pchD	-1.25548	7.12368	4.70323e-31	1.98884e-30
gene105354	PA1293	-1.11798	7.53623	5.24464e-31	2.21609e-30
gene109389	PA3286	-1.06259	8.02024	5.35934e-31	2.26283e-30
gene106804	liuD	-1.41984	8.50361	5.85813e-31	2.46967e-30
gene109743	PA3462	-1.15605	4.70267	6.42951e-31	2.70644e-30
gene104460	PA0853	-1.00788	5.68222	6.98178e-31	2.93669e-30
gene107928	alkB1	-1.25981	3.62758	8.8972e-31	3.73386e-30
gene111000	PA4090	-1.04202	5.19785	9.27974e-31	3.89146e-30
gene107658	PA2440	-1.99174	2.5152	9.42898e-31	3.95106e-30
gene110300	PA3741	1.64726	3.32739	1.03361e-30	4.32788e-30
gene106432	PA1826	-1.21588	4.08178	1.3291e-30	5.55259e-30
gene111046	PA4113	1.22783	4.51855	1.4923e-30	6.22969e-30
gene111262	fptA	1.06357	8.31347	1.51304e-30	6.31154e-30
gene105512	PA1372	-1.09982	8.51903	1.56923e-30	6.54103e-30
gene103409	ygdP	1.02794	8.35423	1.8919e-30	7.87418e-30
gene105142	PA1187	-1.61316	3.34984	2.18759e-30	9.0912e-30
gene104578	PA0909	2.07089	2.29807	2.31099e-30	9.59684e-30
gene108738	PA2971	1.35191	8.81511	3.1495e-30	1.30496e-29
gene108920	pelD	-1.81869	2.35542	4.33386e-30	1.79301e-29
gene107230	PA2225	-1.71382	2.5516	4.54115e-30	1.87635e-29
gene110322	PA3752	1.22597	4.30025	4.54206e-30	1.87635e-29
gene110574	narK1	1.66901	5.09412	5.19016e-30	2.14089e-29
gene110732	PA3956	-1.03747	5.21583	5.78552e-30	2.38293e-29
gene106580	phzB2	-1.43324	3.72555	6.31466e-30	2.59701e-29
gene106096	sfa2	1.21559	6.33889	1.36212e-29	5.56895e-29
gene104183	PA0717	1.93321	2.29738	1.40105e-29	5.72386e-29
gene107144	PA2182	-1.29345	3.3782	1.72735e-29	7.05176e-29
gene113630	betB	-1.61812	9.29642	2.14706e-29	8.74588e-29
gene105630	rsaL	-1.04146	7.38053	2.65712e-29	1.08156e-28
gene111940	pilR	-1.1207	7.0218	2.67259e-29	1.08706e-28
gene109559	PA3370	-1.69972	4.17858	3.12808e-29	1.27047e-28
gene111664	ftsW	1.00683	7.66838	3.18496e-29	1.29262e-28
gene111154	PA4167	-2.05171	1.99935	3.43566e-29	1.39132e-28
gene108990	PA3094.2	1.55353	6.81191	4.48493e-29	1.81227e-28
gene112492	lipC	-1.84572	2.12557	4.49558e-29	1.81525e-28
gene109691	PA3436	1.52862	2.96246	6.20925e-29	2.50355e-28
gene108862	snr1	-1.57183	3.24248	8.30641e-29	3.34427e-28
gene111210	PA4195	1.7001	3.31891	8.79163e-29	3.53705e-28
gene112014	PA4583	1.20791	5.01088	8.98794e-29	3.61341e-28
gene111696	PA4429	1.01888	10.2273	9.14223e-29	3.67278e-28
gene113406	PA5266	1.67376	3.17691	9.23562e-29	3.70761e-28
gene107232	PA2226	-1.62189	3.60416	9.3941e-29	3.76851e-28
gene102859	PA0063	1.0773	5.19706	9.97266e-29	3.98906e-28
gene103299	cysW	1.80863	4.52701	9.97254e-29	3.98906e-28
gene134050	def	1.02579	8.09024	1.19805e-28	4.78874e-28
gene113754	PA5435	1.61074	10.0863	1.62916e-28	6.4979e-28
gene108032	icd	-1.02025	12.6489	1.64906e-28	6.57256e-28
gene110033	potA	1.76153	2.7376	1.73836e-28	6.9235e-28
gene108406	copR	-1.18183	4.77096	2.55864e-28	1.0154e-27
gene111528	PA4345	-1.01722	5.80589	2.76368e-28	1.09599e-27
gene108512	PA2858	-1.00122	6.67174	3.0863e-28	1.22306e-27
gene104712	PA0975	1.26072	4.28991	3.22786e-28	1.27824e-27
gene109403	PA3293	1.37626	3.63555	3.48183e-28	1.37685e-27
gene108672	PA2938	-1.44144	3.04185	3.90305e-28	1.54012e-27
gene102897	tssA1	1.08818	6.9479	4.56173e-28	1.79748e-27
gene106438	PA1829	-1.01359	6.26428	5.89671e-28	2.32021e-27
gene109471	PA3327	-2.19553	10.0427	6.12984e-28	2.41023e-27
gene104764	pqsE	1.52382	9.0293	6.97096e-28	2.73902e-27
gene104810	PA1022	-1.14319	4.47632	7.04598e-28	2.76653e-27
gene113842	gltP	1.18297	7.57102	7.34774e-28	2.88298e-27
gene109921	algA	-1.18325	4.17839	8.34153e-28	3.26828e-27
gene110161	PA3671	-1.06667	6.02781	9.13989e-28	3.57855e-27
gene113526	sphD	-1.36544	3.17584	1.02871e-27	4.02206e-27
gene112036	PA4594	-1.07061	4.65543	1.21519e-27	4.74112e-27
gene302399	amiL	2.92475	1.38523	1.39131e-27	5.42444e-27
gene106876	PA2048	-1.85669	2.63372	1.4799e-27	5.76579e-27
gene107278	bkdB	-1.15966	9.17779	1.54373e-27	6.01026e-27
gene107720	PA2471	-1.52022	3.12117	1.63206e-27	6.34527e-27
gene113056	PA5093	-1.32257	5.05764	1.93771e-27	7.50727e-27
gene106290	PA1760	-1.05467	7.21479	2.25895e-27	8.74573e-27
gene104235	PA0742	-1.61322	2.26871	2.41904e-27	9.35251e-27
gene112554	ctpL	3.86128	5.61964	2.67471e-27	1.03338e-26
gene106850	PA2035	-1.0303	4.61258	2.67926e-27	1.03441e-26
gene113058	PA5094	-1.26033	4.75372	3.10513e-27	1.198e-26
gene106296	PA1763	-1.5599	3.29615	3.45874e-27	1.3335e-26
gene108290	PA2751	-1.18992	4.00738	3.84195e-27	1.47816e-26
gene109593	rhlG	1.33873	3.08361	4.26848e-27	1.63773e-26
gene103465	PA0364	-1.10381	5.08359	6.6572e-27	2.54718e-26
gene109241	PA3214	-1.02962	6.11507	7.96098e-27	3.04394e-26
gene112724	PA4929	-1.10854	5.03828	8.11053e-27	3.09898e-26
gene108156	vgrG4	1.10652	8.10353	1.00734e-26	3.83839e-26
gene106208	pscF	1.51691	4.08249	1.02495e-26	3.90282e-26
gene107670	gcvH2	1.08865	5.4584	1.59261e-26	6.04778e-26
gene104640	PA0939	-1.44701	2.55236	2.09336e-26	7.92761e-26
gene109771	rhlI	-1.12629	8.84729	2.17467e-26	8.22991e-26
gene103999	PA0630	1.83007	2.83337	2.4513e-26	9.26416e-26
gene106646	PA1933	-1.30507	3.80195	2.61247e-26	9.85985e-26
gene110902	PA4041	-1.03559	4.27037	3.39582e-26	1.27902e-25
gene104432	PA0839	1.30879	3.2165	3.99498e-26	1.50367e-25
gene113610	pstC	3.19832	8.26425	4.01623e-26	1.51065e-25
gene113908	mifS	1.05966	4.56393	4.82794e-26	1.8135e-25
gene106732	ercS'	-1.22467	3.5243	5.44541e-26	2.04129e-25
gene113376	PA5251	1.02212	5.24232	5.60666e-26	2.0989e-25
gene104027	PA0644	1.521	3.07666	6.4325e-26	2.40158e-25
gene109561	PA3371	-1.77902	3.75734	6.61429e-26	2.46613e-25
gene107642	bexR	1.12239	4.32637	7.02689e-26	2.61821e-25
gene106216	pscJ	1.50721	4.13921	7.2083e-26	2.684e-25
gene108874	PA3038	-2.01267	8.23065	7.76471e-26	2.88924e-25
gene106884	cynS	-1.56373	3.16477	7.8479e-26	2.91824e-25
gene111556	PA4359	-1.09869	4.68408	8.46811e-26	3.14676e-25
gene110698	PA3939	1.24772	3.42156	9.27589e-26	3.44462e-25
gene112760	miaA	1.15201	8.64968	1.05625e-25	3.9198e-25
gene105214	PA1223	1.30461	4.43396	1.10788e-25	4.10316e-25
gene111138	fepB	-1.81387	2.04128	1.11086e-25	4.11145e-25
gene113446	PA5286	1.14382	5.54616	2.52671e-25	9.30822e-25
gene106566	PA1893	-1.58951	4.39593	2.81431e-25	1.0354e-24
gene112286	PA4713	-1.04535	4.41597	2.8794e-25	1.05864e-24
gene107454	mtlR	-1.22573	3.88118	3.27738e-25	1.20337e-24
gene111092	PA4136	-1.12391	4.36308	3.40975e-25	1.25114e-24
gene110674	PA3927	1.18258	4.63246	4.77871e-25	1.75114e-24
gene104480	PA0863	-1.11687	3.78842	4.95469e-25	1.81443e-24
gene107326	soxR	-1.03711	4.76185	5.11335e-25	1.8713e-24
gene103301	cysT	1.64356	4.48625	6.17712e-25	2.25613e-24
gene113570	PA5348	-1.06864	9.33456	7.747e-25	2.82579e-24
gene107050	PA2135	-1.99	1.53841	8.21447e-25	2.99434e-24
gene113972	PA5544	-1.21875	6.28429	8.22317e-25	2.99555e-24
gene106534	PA1877	-1.37844	2.88742	8.39804e-25	3.05571e-24
gene106806	liuC	-1.33018	6.63523	8.59489e-25	3.1248e-24
gene104350	PA0800	-1.95458	1.91453	9.66363e-25	3.51106e-24
gene105044	PA1138	1.14826	3.81978	1.05459e-24	3.8291e-24
gene111278	pchC	-1.34313	4.62421	1.14019e-24	4.13449e-24
gene108630	PA2917	1.02281	5.11848	1.23316e-24	4.46868e-24
gene113290	PA5208	1.35366	7.24172	1.28173e-24	4.63863e-24
gene113676	PA5396	1.13729	4.15615	1.46111e-24	5.28437e-24
gene107438	PA2329	-1.32498	3.22039	1.48593e-24	5.37065e-24
gene111486	PA4324	1.02513	6.63757	1.62197e-24	5.85471e-24
gene105280	PA1256	-1.8368	1.83176	1.63037e-24	5.88122e-24
gene106370	PA1796.4	1.67219	2.31033	2.29869e-24	8.25444e-24
gene113214	arcD	1.16992	11.5556	2.36593e-24	8.4904e-24
gene107148	PA2184	-1.66423	2.70723	2.61195e-24	9.36724e-24
gene107446	PA2333	-1.41208	2.44448	2.63516e-24	9.44437e-24
gene109305	rluA	1.07526	4.87391	3.26894e-24	1.16932e-23
gene103649	PA0456	1.02259	11.4033	3.83521e-24	1.36923e-23
gene106542	PA1881	-1.1914	3.67607	3.94926e-24	1.40903e-23
gene103247	PA0256	-1.03947	5.56946	4.00489e-24	1.42796e-23
gene104568	PA0905.2	1.36271	7.33394	4.6535e-24	1.65391e-23
gene107662	gcvT2	-1.23273	5.43781	4.87906e-24	1.73186e-23
gene111520	PA4341	-1.60427	2.96721	5.29159e-24	1.87709e-23
gene104666	PA0952	-1.05655	5.60406	5.67755e-24	2.01143e-23
gene108286	endA	1.59615	2.79528	6.37777e-24	2.25519e-23
gene106940	kynU	-1.22578	6.82662	9.75948e-24	3.43563e-23
gene109163	PA3175	-1.64464	2.64928	1.03216e-23	3.63121e-23
gene102835	phzH	-1.2838	3.233	1.07758e-23	3.78861e-23
gene103799	PA0531	-1.12401	3.7999	1.46104e-23	5.1238e-23
gene107496	PA2358	-1.46677	3.43855	1.57452e-23	5.51479e-23
gene104806	PA1020	-1.04437	4.52533	1.74956e-23	6.11246e-23
gene109557	PA3369	-1.51802	5.13309	2.23049e-23	7.77309e-23
gene113818	PA5467	1.34924	3.27127	2.35065e-23	8.18668e-23
gene107854	PA2538	1.48953	3.89132	2.51318e-23	8.74727e-23
gene111140	fepD	-2.07068	1.30341	2.6216e-23	9.11317e-23
gene109171	PA3179	1.09815	7.65214	3.29777e-23	1.14422e-22
gene102831	PA0049	-1.4545	5.69594	3.3399e-23	1.15811e-22
gene110260	nalC	1.22779	5.16535	3.51536e-23	1.21743e-22
gene104766	phnA	1.30676	9.26807	3.92834e-23	1.35875e-22
gene108628	PA2916	2.61975	1.83381	4.42781e-23	1.53056e-22
gene106738	eraS	-2.13259	1.17696	6.30617e-23	2.17578e-22
gene108374	PA2792	1.1196	5.15085	9.75673e-23	3.36005e-22
gene113660	caiX	-1.72767	1.93654	1.05001e-22	3.61158e-22
gene113608	pstA	3.12928	7.93164	1.36178e-22	4.67234e-22
gene105888	PA1559	1.84565	4.71479	1.41736e-22	4.85702e-22
gene106808	liuB	-1.34101	8.22106	1.50736e-22	5.15904e-22
gene106910	pcoA	-1.49613	2.14287	1.53447e-22	5.2486e-22
gene109227	PA3207	-1.201	3.35457	2.06604e-22	7.04943e-22
gene113606	pstB	2.8059	7.68192	2.10679e-22	7.17525e-22
gene111632	panE	-1.08166	4.57257	2.47701e-22	8.42579e-22
gene106822	PA2021	-1.72417	2.1058	3.83188e-22	1.2981e-21
gene108486	PA2846	1.13733	4.26335	3.83254e-22	1.2981e-21
gene113650	PA5383	2.53258	2.08548	4.62362e-22	1.56128e-21
gene106908	pcoB	-2.04085	1.23304	5.22241e-22	1.76026e-21
gene109857	PA3519	-1.56934	2.00907	5.78618e-22	1.94674e-21
gene107468	mtlZ	-1.40784	3.82583	6.92813e-22	2.31829e-21
gene107140	PA2180	-2.10011	1.61329	7.15512e-22	2.39136e-21
gene105286	PA1259	-2.02097	1.44366	7.60619e-22	2.53753e-21
gene112030	PA4591	-1.03008	3.94502	7.68739e-22	2.56154e-21
gene109849	PA3515	-1.06886	4.30371	8.25001e-22	2.74407e-21
gene107920	PA2570.1	1.62831	4.05802	9.70077e-22	3.21889e-21
gene112213	PA4681	-1.08845	3.89636	1.12209e-21	3.71792e-21
gene191115	rgsA	-1.40784	2.5463	1.12248e-21	3.71792e-21
gene105980	PA1605	-1.11058	4.04747	1.14041e-21	3.77506e-21
gene106210	pscG	1.30764	3.8392	1.25726e-21	4.15194e-21
gene103815	PA0539	1.58656	2.70271	1.26004e-21	4.15867e-21
gene112522	PA4828	-1.26449	2.61368	1.3696e-21	4.51489e-21
gene112266	PA4703	-1.55812	3.84824	1.51091e-21	4.97775e-21
gene104756	pqsA	1.24835	9.63213	1.55773e-21	5.1259e-21
gene112612	PA4873	1.2605	3.71423	1.72253e-21	5.65479e-21
gene103897	rpsU	1.09895	8.76114	1.8355e-21	6.02211e-21
gene106068	PA1649	-1.08789	3.48423	2.15269e-21	7.05024e-21
gene102829	PA0048	-1.21416	3.87719	2.19519e-21	7.18518e-21
gene110766	PA3973	1.06051	5.49894	2.69018e-21	8.79499e-21
gene104101	vreR	-1.49992	3.76789	2.77634e-21	9.07135e-21
gene112900	aceE	1.29592	11.5041	2.89786e-21	9.4628e-21
gene112382	dapB	-1.13787	7.47352	2.94387e-21	9.60741e-21
gene104354	PA0802	-1.3788	3.43609	3.31197e-21	1.07833e-20
gene113426	lppL	1.13311	5.02326	3.34567e-21	1.08867e-20
gene109555	PA3368.1	1.68054	2.51939	3.36184e-21	1.09329e-20
gene113038	PA5084	1.48196	3.52278	4.0592e-21	1.31775e-20
gene111534	PA4348	1.03655	9.40728	5.20271e-21	1.68701e-20
gene105278	PA1255	-1.8531	1.7668	5.45074e-21	1.7664e-20
gene109661	PA3421	-1.32788	2.95192	5.58139e-21	1.80768e-20
gene112197	PA4673.1	-1.5845	3.89355	7.63706e-21	2.4634e-20
gene106484	PA1852	-1.73489	8.29116	8.72544e-21	2.8063e-20
gene106688	PA1954	-1.68802	1.67447	9.31527e-21	2.99427e-20
gene106206	pscE	1.82427	1.76753	9.59478e-21	3.08055e-20
gene113186	PA5157	1.21381	2.66401	1.24593e-20	3.98869e-20
gene112360	tpiA	1.00154	9.02378	1.25304e-20	4.00914e-20
gene104225	PA0737	-1.14332	3.32909	1.2895e-20	4.12106e-20
gene105576	PA1404	-1.45613	3.01697	1.51005e-20	4.81756e-20
gene112648	ureE	2.15162	1.57924	1.53e-20	4.87842e-20
gene106568	PA1894	-1.39813	4.61604	2.19201e-20	6.96921e-20
gene104768	phnB	1.17303	7.15876	2.32103e-20	7.36895e-20
gene113678	PA5397	1.57799	2.77535	2.54287e-20	8.06162e-20
gene109267	ppiA	-1.00389	6.86541	2.62217e-20	8.30827e-20
gene106740	eraR	-1.97969	1.20674	2.97831e-20	9.42594e-20
gene134054	PA0021	-1.49107	1.93654	3.59764e-20	1.13601e-19
gene107094	PA2157	-1.85248	1.2452	4.01936e-20	1.26845e-19
gene106670	PA1945	-1.07526	3.90653	4.47682e-20	1.41042e-19
gene105544	PA1388	-1.1497	3.28661	4.65281e-20	1.46337e-19
gene104762	pqsD	1.40412	9.51628	4.89732e-20	1.53852e-19
gene108992	PA3094.3	-2.21992	0.851812	5.76299e-20	1.80537e-19
gene110734	PA3957	-1.05945	4.4716	6.33632e-20	1.97939e-19
gene113596	phoR	3.17175	6.57753	1.12897e-19	3.50112e-19
gene112460	PA4798	-1.01346	3.97486	1.38216e-19	4.26724e-19
gene106590	phzG2	-2.61944	0.363357	1.49244e-19	4.6026e-19
gene105970	PA1600	1.70473	2.57662	1.78424e-19	5.48114e-19
gene104217	PA0733	1.08193	3.50563	2.06401e-19	6.33008e-19
gene110568	narH	1.05542	5.16229	2.12932e-19	6.52677e-19
gene109177	pgl	1.23898	4.70723	2.40298e-19	7.34936e-19
gene108312	PA2762	-1.22761	2.95142	2.48058e-19	7.58251e-19
gene112902	aceF	1.1507	10.5017	3.05815e-19	9.32232e-19
gene104482	PA0864	-1.09352	3.26204	3.19844e-19	9.74462e-19
gene112149	cupE4	-1.38072	2.56686	3.28236e-19	9.99479e-19
gene106364	PA1796.1	1.00818	6.40956	4.85556e-19	1.47125e-18
gene106978	PA2099	-1.40257	2.06139	5.13777e-19	1.55337e-18
gene109377	oprO	4.39734	4.70664	5.46142e-19	1.64853e-18
gene108916	pelF	-1.36516	2.32498	6.70914e-19	2.01856e-18
gene105120	napF	-1.30493	4.04058	6.9887e-19	2.1004e-18
gene111982	rplU	1.15384	9.32455	7.13447e-19	2.14073e-18
gene103181	PA0223	-1.13223	3.63228	8.54073e-19	2.55577e-18
gene102967	PA0117	-1.04517	3.99243	8.70345e-19	2.60306e-18
gene104167	PA0709	-1.24682	2.60611	9.052e-19	2.70585e-18
gene107064	PA2142	-1.8414	1.31984	1.02402e-18	3.05443e-18
gene102787	PA0032	1.08103	4.72335	1.21418e-18	3.61195e-18
gene108162	pfeA	-1.65108	2.04574	1.2949e-18	3.84589e-18
gene109245	PA3216	-1.00412	4.0853	1.29771e-18	3.85011e-18
gene108342	pauB3	2.00455	7.39641	1.3115e-18	3.88895e-18
gene107038	cupA2	2.09977	1.38223	1.52286e-18	4.50603e-18
gene106736	erbR	-1.14881	2.7521	2.04154e-18	6.01513e-18
gene106974	PA2097	-1.02406	3.58846	2.65046e-18	7.78442e-18
gene113594	phoB	2.88141	7.46406	3.60015e-18	1.05458e-17
gene109551	PA3367	1.09396	3.73294	3.63734e-18	1.06491e-17
gene105790	PA1511	1.04588	3.55114	3.68418e-18	1.07748e-17
gene105156	PA1194	-1.17608	3.55188	3.74389e-18	1.09437e-17
gene109329	PA3258	3.02943	4.29599	3.81992e-18	1.11483e-17
gene302411	ccoQ2	1.09754	5.5048	4.0673e-18	1.18516e-17
gene104760	pqsC	1.43517	9.3203	4.68445e-18	1.36284e-17
gene107066	PA2143	-1.88949	1.35617	7.40104e-18	2.13859e-17
gene106564	PA1892	-1.63168	2.55898	7.54667e-18	2.17841e-17
gene107126	PA2173	-1.45926	2.12331	9.27387e-18	2.67003e-17
gene111434	PA4298	-2.73768	0.227725	1.01793e-17	2.92767e-17
gene108322	PA2767	-1.28689	2.6374	1.14703e-17	3.29555e-17
gene113628	betA	-1.21512	7.53766	1.22656e-17	3.52042e-17
gene107214	PA2217	-1.37371	2.04857	1.35136e-17	3.87461e-17
gene104758	pqsB	1.30333	9.30978	1.37913e-17	3.95218e-17
gene107870	PA2546	-1.03189	3.50061	1.5132e-17	4.32966e-17
gene107718	gtdA	-1.23566	2.72562	1.51487e-17	4.33221e-17
gene107362	PA2291	1.12826	3.31812	1.61719e-17	4.61057e-17
gene106084	hsiB2	1.09619	7.20635	1.7018e-17	4.84929e-17
gene106570	PA1895	-1.40467	4.68786	1.83083e-17	5.21162e-17
gene107228	PA2224	-1.00015	3.29149	2.32499e-17	6.59123e-17
gene112143	cupE1	-1.19058	2.64844	2.95536e-17	8.34844e-17
gene112918	PA5024	1.59743	2.80536	3.41788e-17	9.65008e-17
gene109405	PA3294	1.34641	2.49011	3.74369e-17	1.05539e-16
gene108172	PA2693	1.25462	2.79285	3.8224e-17	1.07703e-16
gene103115	PA0191	1.32759	3.10198	4.68434e-17	1.31655e-16
gene105132	PA1182	-1.0004	3.88836	6.09273e-17	1.70892e-16
gene113612	pstS	3.46651	9.61069	6.27153e-17	1.75818e-16
gene107184	PA2202	2.09441	1.44722	6.39586e-17	1.79123e-16
gene103267	gabD	1.48805	9.35688	8.56768e-17	2.38862e-16
gene104362	PA0806	-1.40259	2.03652	9.4662e-17	2.6325e-16
gene109545	amiC	1.00096	5.60017	9.8459e-17	2.73673e-16
gene107316	PA2268	-1.56967	1.83724	1.04022e-16	2.88701e-16
gene113060	PA5095	-1.38519	4.12468	1.15309e-16	3.19708e-16
gene107424	PA2322	-1.31248	2.86025	1.48951e-16	4.11544e-16
gene106214	pscI	1.43774	2.92265	1.7387e-16	4.792e-16
gene106836	PA2028	1.06397	3.17394	2.0091e-16	5.5208e-16
gene111176	PA4178	1.14533	2.51333	2.54721e-16	6.97183e-16
gene113742	aspA	1.05213	9.96231	4.8403e-16	1.31315e-15
gene112464	PA4800	1.06333	3.35105	5.032e-16	1.36449e-15
gene108350	PA2780	1.1016	4.13751	5.88665e-16	1.59157e-15
gene105122	napE	-1.01007	4.28059	6.52706e-16	1.763e-15
gene106040	kdpC	1.70092	1.94035	6.65408e-16	1.79644e-15
gene108736	rpmF	1.04663	8.79256	8.45635e-16	2.27195e-15
gene107090	PA2155	-1.97394	0.875089	1.1174e-15	2.99631e-15
gene112020	PA4586	1.55652	1.75425	1.57372e-15	4.20367e-15
gene104169	gloA2	-1.25287	2.20819	2.11999e-15	5.6276e-15
gene113604	phoU	2.14574	7.79808	2.12804e-15	5.64627e-15
gene112416	pmrA	1.0072	4.5705	2.86874e-15	7.58615e-15
gene109365	PA3274	-1.41791	2.01615	3.06025e-15	8.0849e-15
gene111198	PA4189	-1.07897	2.87423	3.42885e-15	9.05438e-15
gene107432	PA2326	-1.1981	2.34705	3.79178e-15	9.98425e-15
gene106622	PA1921	-1.3715	2.15118	4.54254e-15	1.19271e-14
gene107102	PA2161	-3.4318	-0.474758	5.04828e-15	1.323e-14
gene108922	pelC	-1.77675	1.18925	7.31603e-15	1.90739e-14
gene111436	tadD	-1.31568	1.89632	8.23983e-15	2.14723e-14
gene109042	PA3119	1.15214	3.64537	8.45723e-15	2.20182e-14
gene110604	PA3892	1.31001	2.44007	9.57821e-15	2.49016e-14
gene108668	PA2936	-1.36183	2.14872	9.90209e-15	2.57074e-14
gene108394	PA2803	4.47312	1.52336	1.02327e-14	2.65534e-14
gene107130	PA2175	-1.23416	2.44049	1.0238e-14	2.65547e-14
gene104302	PA0776	-1.05458	3.06277	1.25974e-14	3.25981e-14
gene106218	pscK	1.23527	2.32208	1.37854e-14	3.55726e-14
gene109110	wbpI	-1.12776	7.92374	1.89029e-14	4.8575e-14
gene106212	pscH	1.45809	2.99051	2.22373e-14	5.7064e-14
gene104716	PA0976.1	1.19313	4.20786	2.61479e-14	6.70063e-14
gene108614	PA2909	-1.25492	2.42462	2.82003e-14	7.21324e-14
gene109643	PA3412	-1.25912	2.68021	3.21731e-14	8.20672e-14
gene107352	PA2286	-1.89248	0.96536	3.73015e-14	9.48435e-14
gene109855	PA3518	-1.39982	1.36798	3.80523e-14	9.66198e-14
gene106254	pauD2	1.05184	8.0207	3.81109e-14	9.67244e-14
gene107350	PA2285	-1.60571	1.7936	4.10884e-14	1.04186e-13
gene107268	pslN	-1.34433	2.55806	5.29319e-14	1.33789e-13
gene107092	PA2156	-2.32374	0.181673	5.30307e-14	1.33977e-13
gene109287	PA3237	-2.40012	0.116543	6.23429e-14	1.56577e-13
gene103331	spuA	1.5352	5.81879	6.36428e-14	1.59769e-13
gene107488	PA2354	-1.46829	1.9623	7.37824e-14	1.84473e-13
gene110682	PA3931	1.03369	3.71391	7.39696e-14	1.84774e-13
gene107054	PA2137	-1.43418	1.66206	8.1255e-14	2.02517e-13
gene111428	fppA	1.76246	1.0743	8.30422e-14	2.06785e-13
gene112470	PA4802.1	1.69201	1.74373	1.48828e-13	3.67794e-13
gene103081	PA0174	-1.42241	2.5013	1.52957e-13	3.77663e-13
gene109811	PA3496	-1.37383	5.52076	2.21584e-13	5.4252e-13
gene105586	aphA	-1.14109	2.80672	2.22877e-13	5.45444e-13
gene103141	PA0203	-1.03324	2.44833	2.29538e-13	5.60508e-13
gene110468	PA3824.1	1.49415	1.50628	2.3133e-13	5.64637e-13
gene103615	PA0439	1.71602	1.32354	3.1793e-13	7.73291e-13
gene104197	PA0724	1.20223	2.45018	3.32192e-13	8.07626e-13
gene104378	PA0814	-1.15343	2.19341	5.14282e-13	1.24378e-12
gene106964	PA2092	-1.53264	1.1205	5.16784e-13	1.24874e-12
gene106618	nrdG	-1.28622	2.42927	5.34779e-13	1.28998e-12
gene107088	PA2154	-2.16811	0.196798	6.19562e-13	1.49125e-12
gene111204	PA4192	1.67741	1.42491	6.51097e-13	1.56512e-12
gene105478	PA1355	-2.10437	0.432462	7.1387e-13	1.71304e-12
gene112404	lldP	-1.33185	9.29245	8.75007e-13	2.08977e-12
gene111196	PA4188	-1.06438	2.34698	1.16893e-12	2.77172e-12
gene107898	PA2560	1.03984	4.64253	1.76747e-12	4.16918e-12
gene107652	PA2437	-1.37945	1.84693	1.9868e-12	4.67661e-12
gene103685	PA0474	2.67381	-0.0705984	2.49362e-12	5.83986e-12
gene111924	PA4541.1	1.24644	2.24935	2.77571e-12	6.48953e-12
gene107120	PA2170	-2.03714	0.267107	4.50508e-12	1.0436e-11
gene108592	PA2898	-1.11907	2.32345	5.14374e-12	1.18906e-11
gene109669	PA3425	-1.17969	2.10844	5.57059e-12	1.28506e-11
gene113698	PA5407	1.26103	1.78515	6.2225e-12	1.43187e-11
gene104438	PA0842	3.1828	1.90066	6.29699e-12	1.44841e-11
gene106734	PA1977	-1.82734	0.41951	6.44437e-12	1.4817e-11
gene110564	narI	1.10518	4.17588	8.27568e-12	1.8949e-11
gene110740	PA3960	-1.04552	2.45371	9.05334e-12	2.06784e-11
gene113082	PA5106	-1.13744	4.70941	1.08781e-11	2.46938e-11
gene111206	PA4193	2.12247	0.675967	1.16384e-11	2.63873e-11
gene108634	PA2919	-1.73849	0.542741	1.22359e-11	2.76968e-11
gene107074	katE	-1.24472	2.23719	1.29463e-11	2.92452e-11
gene108560	PA2882	2.57204	2.28964	1.33702e-11	3.01904e-11
gene105850	PA1540	2.06522	0.480625	1.86978e-11	4.20834e-11
gene104308	asrA	-1.13133	9.48296	2.52953e-11	5.67254e-11
gene107790	PA2506	-1.79841	0.496737	2.78123e-11	6.21436e-11
gene103333	spuB	1.00639	7.76097	4.20364e-11	9.31382e-11
gene104209	PA0729.1	2.26942	-0.0338731	5.60035e-11	1.23297e-10
gene302395	phrD	1.22072	3.48531	6.35582e-11	1.39541e-10
gene111928	PA4541.3	1.0539	1.97494	6.41828e-11	1.40857e-10
gene105134	dctA	1.04798	6.59098	8.33159e-11	1.8227e-10
gene107222	PA2221	-1.05317	2.32916	1.21077e-10	2.62705e-10
gene106644	PA1932	-1.21527	2.02037	1.2916e-10	2.79586e-10
gene107194	PA2207	-1.64792	0.537954	1.6303e-10	3.50714e-10
gene103887	PA0574.1	1.78857	0.519537	2.0331e-10	4.35676e-10
gene108666	PA2935	-1.25805	1.65326	2.43571e-10	5.19742e-10
gene103619	dht	1.14125	2.00841	2.52217e-10	5.37779e-10
gene109409	phoA	2.72873	3.65517	2.94792e-10	6.25673e-10
gene105140	PA1186	-1.18767	1.80065	3.43498e-10	7.27654e-10
gene107186	PA2203	1.65046	1.51338	3.81972e-10	8.07307e-10
gene106098	orfX	1.16243	2.70556	4.89209e-10	1.02847e-09
gene106748	exaC	-1.94571	0.0356726	5.35633e-10	1.12479e-09
gene107408	pvdH	-1.69	0.412721	5.68246e-10	1.19102e-09
gene105890	PA1560	1.08066	4.28391	6.51906e-10	1.36328e-09
gene104590	PA0915	1.0559	2.75655	7.06996e-10	1.47515e-09
gene108324	PA2768	-1.36556	0.895254	7.80677e-10	1.62399e-09
gene106730	PA1975	-1.00243	2.1379	9.14954e-10	1.89692e-09
gene107080	PA2150	-1.16947	1.81709	9.68597e-10	2.00514e-09
gene113556	PA5341	1.5359	1.88548	1.27635e-09	2.62364e-09
gene111202	PA4191	1.40826	1.77834	1.43024e-09	2.93019e-09
gene113036	PA5083	1.56545	1.86192	1.44114e-09	2.94816e-09
gene112650	ureF	1.55826	0.532229	1.77641e-09	3.62203e-09
gene106856	PA2038	1.27496	1.39962	1.77862e-09	3.6252e-09
gene110648	moeA1	1.32137	2.68722	1.96383e-09	3.99829e-09
gene108924	pelB	-1.02868	3.0214	2.01091e-09	4.09263e-09
gene106626	PA1923	-1.17384	1.41926	2.06667e-09	4.20149e-09
gene105274	PA1253	-1.60973	0.425426	2.09006e-09	4.24749e-09
gene103631	gcdH	-1.12365	7.5654	2.47612e-09	5.01551e-09
gene110566	narJ	1.04507	3.56665	3.19343e-09	6.44963e-09
gene108302	PA2757	1.12849	2.76447	3.31444e-09	6.69161e-09
gene113844	PA5480	-1.54598	0.443502	3.58169e-09	7.21802e-09
gene107070	PA2145	-1.04865	2.17249	4.16618e-09	8.35344e-09
gene106578	phzA2	-1.29652	1.24129	5.47616e-09	1.09248e-08
gene106968	PA2094	-1.12093	1.38163	5.80851e-09	1.1567e-08
gene106334	PA1782	-1.04194	1.55492	6.27785e-09	1.24658e-08
gene109187	PA3187	1.14693	3.45452	6.32548e-09	1.25559e-08
gene106976	PA2098	-1.21301	1.7296	6.68171e-09	1.32583e-08
gene108918	pelE	-1.40729	0.850623	8.09659e-09	1.59914e-08
gene105982	PA1606	2.38089	4.25798	9.39491e-09	1.84899e-08
gene107204	PA2212	-1.1295	1.92515	1.36585e-08	2.67009e-08
gene113462	PA5294	1.02813	2.45762	1.37942e-08	2.69568e-08
gene107152	PA2186	-1.37228	0.655392	1.46662e-08	2.86104e-08
gene106928	PA2074	-1.11592	1.47918	1.64047e-08	3.19345e-08
gene106490	PA1855	-1.47992	0.495523	1.91462e-08	3.71669e-08
gene107410	PA2315	-1.02581	1.66988	1.91554e-08	3.71719e-08
gene103211	PA0238	-1.03112	1.81201	2.52971e-08	4.88509e-08
gene105076	PA1154	1.1233	1.384	2.76683e-08	5.33741e-08
gene104394	PA0822	1.10118	1.55297	3.42634e-08	6.57535e-08
gene107492	msuD	-1.31906	0.821791	3.56209e-08	6.83114e-08
gene104330	PA0790	-1.11646	1.2334	3.76848e-08	7.21695e-08
gene108402	PA2807	-1.34134	0.945636	6.01407e-08	1.13916e-07
gene191113	P15	1.17524	3.69113	6.61047e-08	1.25e-07
gene107874	PA2548	1.78715	3.13546	7.56556e-08	1.42671e-07
gene108396	PA2804	3.0439	1.51391	7.5949e-08	1.43175e-07
gene107404	PA2312	1.40314	0.853532	7.64947e-08	1.44155e-07
gene106340	nasT	-1.44204	0.623347	7.67145e-08	1.44471e-07
gene104588	PA0914	1.00593	1.77803	7.75656e-08	1.45975e-07
gene107776	PA2499	-1.0153	1.49641	8.518e-08	1.59763e-07
gene109717	PA3449	1.79795	0.296982	8.55269e-08	1.60305e-07
gene113170	PA5149.1	1.14278	1.16798	8.97823e-08	1.67941e-07
gene107634	PA2428	2.32275	4.49775	1.07741e-07	2.00385e-07
gene108130	PA2672	-1.33041	0.848636	1.30486e-07	2.41716e-07
gene107136	PA2178	-1.56216	0.180204	2.50871e-07	4.58896e-07
gene113502	PA5314	1.0863	5.38363	3.49703e-07	6.32795e-07
gene107354	PA2287	-1.72988	0.111525	3.90369e-07	7.04315e-07
gene107138	PA2179	-1.03884	1.6045	3.9906e-07	7.19294e-07
gene103217	PA0241	-1.03184	1.4173	4.60683e-07	8.27142e-07
gene107062	PA2141	-1.80632	-0.40826	5.4689e-07	9.75923e-07
gene106872	PA2046	-1.0306	1.30255	6.40623e-07	1.13879e-06
gene105192	PA1212	-1.15895	1.39012	8.16005e-07	1.44178e-06
gene103117	PA0192	1.16968	0.864092	8.26426e-07	1.45973e-06
gene302419	PA4724.1	1.09738	2.26832	9.20527e-07	1.62181e-06
gene107158	PA2189	-1.10571	0.902871	1.2638e-06	2.21184e-06
gene108978	PA3090	-1.04332	1.01249	1.81247e-06	3.14728e-06
gene106960	PA2090	-1.15336	0.848505	1.85338e-06	3.21331e-06
gene108432	PA2819.3	1.29164	1.83449	2.38702e-06	4.10132e-06
gene191133	P34	1.59048	-0.0352103	2.42669e-06	4.16434e-06
gene104131	PA0691	1.39849	0.214577	2.64319e-06	4.52606e-06
gene104149	PA0700	-1.23425	0.442406	2.81979e-06	4.82101e-06
gene113956	dksA2	2.18865	-0.313463	3.55582e-06	6.04774e-06
gene107450	PA2335	1.04203	1.07745	6.84232e-06	1.14341e-05
gene107480	PA2350	-1.1529	0.721871	7.0612e-06	1.17928e-05
gene103623	PA0443	1.0397	0.939494	8.7598e-06	1.45376e-05
gene112506	PA4820	1.31193	0.0716167	1.04209e-05	1.72325e-05
gene109581	PA3381	1.85316	0.533055	1.16785e-05	1.92604e-05
gene107474	PA2347	-1.49775	0.0888116	1.18784e-05	1.95727e-05
gene104113	PA0682	1.61095	0.71142	1.2555e-05	2.0663e-05
gene111568	PA4365	-1.13224	0.52428	1.48023e-05	2.42538e-05
gene105284	PA1258	-1.41712	-0.407284	1.60461e-05	2.6284e-05
gene106994	PA2107	-1.32642	0.356894	1.66083e-05	2.71408e-05
gene107154	PA2187	-1.05352	0.843394	1.96129e-05	3.19661e-05
gene107146	PA2183	-1.00829	0.760727	2.3563e-05	3.82805e-05
gene104191	PA0721	1.26699	0.257152	3.12677e-05	5.03698e-05
gene107482	PA2351	-1.29996	-0.164042	3.83436e-05	6.14117e-05
gene107430	PA2325	-1.36106	-0.173758	3.88934e-05	6.22204e-05
gene107478	PA2349	-1.12256	0.203746	5.15065e-05	8.17854e-05
gene108056	PA2635	1.19958	2.56247	8.55312e-05	0.000134085
gene109585	PA3383	1.61933	2.31184	8.71848e-05	0.000136562
gene302405	PA5316.1	1.24305	0.192432	0.000137768	0.0002138
gene111540	olsA	1.48329	0.766359	0.000275356	0.000418771
gene104121	PA0686	1.08499	0.560304	0.000336383	0.000508378
gene103261	hcpC	1.15349	0.204211	0.000517773	0.000772828
gene108558	PA2881	1.5323	2.01687	0.000542621	0.000808394
gene109587	phnC	1.25678	1.80626	0.000926102	0.00135069
gene109583	phnE	1.29211	0.897776	0.0012372	0.00178379
gene106880	PA2050	1.04971	0.199042	0.00215746	0.00305112
gene106164	PA1697	4.7494	5.67676	3.80638054869013e-319	2.03055743344906e-317
gene113902	PA5509	4.28848	6.08087	4.26625685183916e-320	2.29797836931097e-318
gene105262	aprE	-4.17746	7.50891	5.91541567070466e-315	3.06717066740075e-313
gene113900	pauA7	4.14106	7.28176	1.03729906445867e-315	5.42918415997847e-314
gene111088	PA4134	5.13072	6.19592	1.71623968767078e-316	9.06828360854867e-315

## Sheet: FC_all_genes_LB9_vers_Mix
geneID	logFC	logCPM	PValue	FDR
gene107628	-10.2337	7.37594	0	0
gene107568	-9.66513	8.47516	0	0
gene107574	-9.65029	8.61704	0	0
gene107566	-9.64586	8.80078	0	0
gene107552	-9.62403	11.3649	0	0
gene107550	-9.56592	8.89115	0	0
gene107626	-9.5527	11.7949	0	0
gene107600	-9.33061	8.91392	0	0
gene107602	-9.23421	7.84429	0	0
gene107604	-8.97081	9.67474	0	0
gene107570	-8.94095	8.47086	0	0
gene107548	-8.8145	8.29976	0	0
gene107840	-8.37279	7.41075	0	0
gene111778	-8.12975	10.0176	0	0
gene107630	-8.04761	7.31739	0	0
gene109633	-8.00227	8.82007	0	0
gene111774	-7.98543	9.04772	0	0
gene111772	-7.87058	8.6667	0	0
gene111780	-7.76698	6.07319	0	0
gene111986	-7.74796	8.02345	0	0
gene105124	7.69618	12.0413	0	0
gene107582	-7.62335	11.7833	0	0
gene111776	-7.54237	8.00367	0	0
gene105266	-7.38794	11.9287	0	0
gene107576	-7.25631	9.80487	0	0
gene107572	-7.12923	9.46416	0	0
gene107578	-7.0882	10.9054	0	0
gene111116	-6.93441	5.13135	0	0
gene107580	-6.92326	10.8434	0	0
gene107564	-6.91662	8.69643	0	0
gene111118	-6.63007	4.32181	0	0
gene107380	-6.48898	7.47408	0	0
gene106848	-6.47317	6.45657	0	0
gene111170	-6.40575	9.82769	0	0
gene110266	-6.39774	11.5633	0	0
gene106918	-6.38785	6.65339	0	0
gene106846	-6.37691	7.89714	0	0
gene105258	-6.2539	10.6646	0	0
gene111122	-6.23118	5.4511	0	0
gene106522	-6.0583	10.7787	0	0
gene105260	-5.98421	8.48512	0	0
gene104093	-5.93236	7.55614	0	0
gene107682	-5.89737	6.30312	0	0
gene111120	-5.82875	5.75903	0	0
gene107680	-5.76325	6.87575	0	0
gene108674	-5.70897	9.51041	0	0
gene112280	-5.70712	7.43805	0	0
gene107588	-5.64899	6.32281	0	0
gene107534	-5.59862	5.95612	0	0
gene107590	-5.59008	5.65884	0	0
gene109775	-5.56951	8.0521	0	0
gene109635	-5.56317	5.83207	0	0
gene107562	-5.55953	6.74087	0	0
gene111082	5.50341	9.37588	0	0
gene107586	-5.44449	6.696	0	0
gene107592	-5.44275	7.05824	0	0
gene109777	-5.4403	8.92782	0	0
gene107558	-5.429	7.31996	0	0
gene107594	-5.42352	6.17951	0	0
gene112022	5.39796	10.4529	0	0
gene111126	-5.34961	6.1629	0	0
gene107560	-5.3381	7.01116	0	0
gene104163	-5.26217	5.50086	0	0
gene107584	-5.24569	7.81777	0	0
gene111102	-5.20579	9.59766	0	0
gene111156	-5.20572	5.54398	0	0
gene105262	-5.19196	7.50891	0	0
gene109927	5.17574	7.49837	0	0
gene108520	-5.15674	7.43968	0	0
gene109931	5.14168	5.77862	0	0
gene107596	-5.12461	6.00362	0	0
gene105064	-5.04235	5.98244	0	0
gene111124	-5.02949	5.33482	0	0
gene105454	4.96458	5.41356	0	0
gene112278	-4.96001	5.82802	0	0
gene105370	-4.94425	6.28369	0	0
gene109923	4.93622	6.57525	0	0
gene107710	-4.84561	6.29062	0	0
gene109981	-4.77245	5.56936	0	0
gene109539	-4.74395	5.64547	0	0
gene112028	-4.62027	7.62121	0	0
gene107598	-4.59644	7.32771	0	0
gene105264	-4.54599	7.01708	0	0
gene109879	-4.49659	6.59534	0	0
gene105126	4.49317	9.48442	0	0
gene109983	-4.23722	7.26157	0	0
gene105128	4.07427	7.81107	0	0
gene111834	-4.04937	7.67471	0	0
gene102939	-4.02284	5.72291	0	0
gene102945	-3.87082	5.83295	0	0
gene109937	5.22044	7.07913	1.20971973384229e-319	7.37530326667604e-318
gene109881	3.94344	9.05506	1.75809717621927e-316	1.06020903618196e-314
gene112626	4.61793	7.0543	2.10630292911172e-315	1.2565342634988e-313
gene109955	-3.60598	6.42952	0	1.39774e-307
gene113896	4.71465	6.61645	0	4.03475e-307
gene105036	-6.0636	4.39964	4.30425e-307	2.4875e-305
gene102949	-4.03066	5.15409	1.51342e-303	8.65615e-302
gene112042	-4.07858	5.96085	1.02966e-301	5.82913e-300
gene105030	-3.92013	5.27352	5.22502e-300	2.92812e-298
gene113900	3.99194	7.28176	1.06083e-295	5.8855e-294
gene104624	-3.35837	5.41554	1.05139e-293	5.77539e-292
gene113902	4.09921	6.08087	3.142e-292	1.709e-290
gene111838	-4.04068	9.34231	9.06562e-292	4.88311e-290
gene111988	4.47717	9.49479	2.6043e-291	1.38929e-289
gene108556	-4.01754	4.82693	3.73962e-289	1.97594e-287
gene111104	-4.58014	5.50783	6.48222e-289	3.39277e-287
gene105368	-4.11069	5.13459	9.10282e-285	4.71985e-283
gene113898	4.25282	7.15974	1.14318e-274	5.87256e-273
gene107546	-2.94121	6.07961	1.87263e-274	9.53153e-273
gene106634	-3.32384	5.63917	2.34666e-274	1.18357e-272
gene108618	-3.05838	5.8258	9.52929e-274	4.76293e-272
gene112276	-3.01918	6.65652	5.9669e-270	2.95575e-268
gene107606	-3.18449	5.88398	8.56599e-269	4.20567e-267
gene109957	-3.2262	6.51098	1.52823e-267	7.43738e-266
gene105268	-2.88626	7.15989	6.85493e-266	3.30706e-264
gene111098	-4.36179	6.99788	2.48328e-263	1.18769e-261
gene109925	5.00607	5.9957	8.64336e-263	4.09858e-261
gene160439	-7.42535	4.78897	2.58168e-260	1.21383e-258
gene105332	-6.23652	8.05783	6.20718e-259	2.8939e-257
gene102977	-4.07949	8.28877	1.62301e-257	7.50373e-256
gene110666	-3.67759	9.102	2.46571e-256	1.13056e-254
gene103679	-3.34575	5.14485	2.74671e-256	1.24908e-254
gene160437	-5.89731	7.41192	1.98318e-255	8.94525e-254
gene112044	-3.98988	6.92864	1.31508e-252	5.88393e-251
gene109929	5.28373	5.26532	4.88858e-246	2.16975e-244
gene106518	-4.06567	6.58768	4.95272e-245	2.18077e-243
gene107510	-2.98984	6.78098	1.26355e-244	5.51984e-243
gene111274	-2.82621	7.45808	5.41159e-242	2.34559e-240
gene103289	-3.6676	4.70241	3.56784e-241	1.53445e-239
gene105334	-2.87403	6.57129	1.15249e-240	4.91846e-239
gene111084	3.57621	9.55476	2.54407e-240	1.07744e-238
gene109987	-4.06666	6.23507	1.60116e-238	6.72971e-237
gene111570	2.89605	11.218	1.0537e-237	4.39544e-236
gene102943	-3.26346	6.91698	1.97173e-233	8.16354e-232
gene106916	-5.00043	4.5186	2.39011e-233	9.82247e-232
gene109959	-3.08131	8.30072	1.15295e-231	4.70336e-230
gene104334	-3.14142	7.55549	4.46918e-228	1.80986e-226
gene103827	2.96608	7.43285	5.11298e-228	2.05557e-226
gene112658	-3.98902	4.11485	9.49721e-224	3.79069e-222
gene107524	-3.15089	6.09076	6.20807e-223	2.46017e-221
gene112026	-3.11168	5.47932	1.80068e-222	7.08522e-221
gene106338	-3.51493	5.32155	2.70475e-219	1.05676e-217
gene107514	-3.7831	6.1387	2.8122e-215	1.09105e-213
gene109649	-3.60716	4.85381	4.81618e-213	1.85557e-211
gene112205	-2.59439	6.60335	1.46232e-212	5.59514e-211
gene110668	-2.7701	6.94874	1.10583e-211	4.20216e-210
gene105028	-4.17636	6.33332	1.30464e-211	4.9239e-210
gene103469	-2.6103	6.41043	2.00464e-211	7.51468e-210
gene107522	-3.59201	6.45336	5.46091e-211	2.03336e-209
gene109637	-4.16016	3.93424	1.54856e-210	5.7276e-209
gene107456	-4.34396	5.73308	2.66285e-210	9.78378e-209
gene104602	3.63296	4.65048	2.65383e-209	9.68647e-208
gene112656	-4.96974	3.80074	3.15855e-209	1.14534e-207
gene109651	-3.27114	4.93498	7.87363e-207	2.83655e-205
gene107526	-2.63893	6.54975	9.45429e-206	3.38403e-204
gene110540	-2.39788	6.8086	1.88178e-205	6.69238e-204
gene102793	-2.83179	7.69752	2.61775e-205	9.25049e-204
gene107512	-3.77578	7.75639	8.41165e-205	2.95366e-203
gene111086	3.86272	8.91872	1.69698e-203	5.92129e-202
gene112448	-2.53578	6.61507	4.3788e-203	1.51835e-201
gene102827	2.81263	6.22508	7.32728e-202	2.52496e-200
gene111106	-3.44441	4.25632	5.96507e-200	2.04285e-198
gene112816	2.71685	8.04331	6.62438e-199	2.25473e-197
gene106602	-3.72456	4.32171	9.23637e-198	3.1246e-196
gene102825	2.96438	5.98444	1.42623e-197	4.7956e-196
gene108522	-4.83821	3.87744	1.73797e-196	5.80857e-195
gene102791	-2.62582	8.4814	1.77717e-196	5.90402e-195
gene103137	3.10665	5.52272	1.2165e-193	4.01735e-192
gene104005	3.068	6.84545	1.54283e-193	5.06487e-192
gene108958	-2.59727	7.00618	1.66815e-193	5.44405e-192
gene107910	-2.85604	5.54145	4.35967e-193	1.41447e-191
gene107390	-2.52727	8.70286	1.36489e-192	4.40257e-191
gene104009	3.04716	5.36326	1.04653e-191	3.35616e-190
gene103881	-4.58456	10.3089	2.56406e-191	8.17551e-190
gene103291	3.27402	6.2087	8.10261e-191	2.56876e-189
gene111114	-2.9207	7.67898	1.256e-190	3.95926e-189
gene111292	3.0875	10.8554	9.01075e-189	2.82439e-187
gene109485	-4.6538	6.37402	4.525e-186	1.41038e-184
gene107386	-2.82109	6.63988	5.30731e-186	1.64497e-184
gene104458	-4.06692	9.40444	1.16939e-185	3.60431e-184
gene107382	-2.6504	5.6429	1.64784e-185	5.05095e-184
gene112986	-2.63244	6.23873	3.03373e-183	9.24788e-182
gene107464	-5.04251	4.42767	5.65425e-183	1.7142e-181
gene107520	-3.8308	4.22139	1.30226e-182	3.92659e-181
gene108310	-2.7827	5.05177	1.629e-182	4.88525e-181
gene112488	2.80073	6.77533	3.99093e-182	1.19041e-180
gene107388	-2.82765	7.04664	5.40111e-180	1.60242e-178
gene109549	3.42243	7.57287	2.85897e-179	8.437e-178
gene107712	-3.21654	4.49159	4.17572e-179	1.22576e-177
gene106786	-3.06904	7.32096	1.85262e-178	5.40966e-177
gene102947	-4.19198	3.66528	2.2092e-176	6.41708e-175
gene112486	2.7681	5.66794	4.63001e-175	1.33788e-173
gene111842	-2.88856	7.7317	6.81303e-175	1.95848e-173
gene105272	-2.26541	5.60282	8.3245e-175	2.38064e-173
gene104007	2.97989	5.70185	3.0174e-174	8.5849e-173
gene107462	-4.52835	4.79343	3.69164e-172	1.04496e-170
gene110664	-3.55428	8.82508	1.58258e-170	4.45694e-169
gene105148	-3.08167	4.60064	1.49096e-169	4.1777e-168
gene106606	2.2684	6.24512	2.48974e-169	6.94124e-168
gene110646	2.54159	6.8317	1.24901e-168	3.46475e-167
gene111100	-4.16056	4.56776	3.05624e-167	8.43584e-166
gene109629	-4.84412	2.95682	6.85102e-166	1.88166e-164
gene112490	2.50324	9.17581	1.39553e-165	3.814e-164
gene104596	2.86585	5.87744	4.23893e-164	1.15282e-162
gene111266	2.60492	6.16237	5.11409e-164	1.38405e-162
gene109469	-3.79939	10.2106	5.73418e-164	1.54433e-162
gene106788	-2.49838	5.93789	1.21651e-163	3.26048e-162
gene109773	-2.53341	9.32509	6.2969e-163	1.67958e-161
gene109483	-5.08472	7.75326	2.52119e-162	6.69261e-161
gene104414	-2.58275	6.71499	2.57581e-161	6.80506e-160
gene109481	-5.12078	7.40134	9.39354e-161	2.46992e-159
gene107906	-2.5025	5.17683	2.06678e-160	5.40872e-159
gene113172	-2.14086	6.79346	1.39128e-159	3.62385e-158
gene104386	-3.41945	3.63416	3.62369e-159	9.3945e-158
gene106834	-4.21598	4.35089	5.7889e-159	1.4938e-157
gene109653	-2.79072	4.71398	2.68562e-158	6.89807e-157
gene103983	2.9128	7.94808	7.44388e-158	1.90316e-156
gene106244	-2.16408	6.4766	1.03608e-157	2.63678e-156
gene111840	-4.84203	7.04907	2.67881e-157	6.78632e-156
gene109487	-4.69769	7.07176	5.28204e-157	1.33204e-155
gene111264	2.5849	5.95622	3.83563e-156	9.62898e-155
gene111238	-4.84701	7.69156	1.42602e-154	3.56377e-153
gene109631	-4.6963	3.22663	1.41238e-153	3.51386e-152
gene109475	-4.94681	7.47834	5.77807e-153	1.4311e-151
gene102837	-2.98921	4.40763	1.09099e-152	2.69014e-151
gene107960	-2.24544	5.97696	2.90482e-151	7.13095e-150
gene111234	-2.32992	6.26747	4.64261e-151	1.13468e-149
gene109719	2.94666	5.26943	9.22244e-151	2.24413e-149
gene111080	4.05787	9.38298	1.46783e-149	3.55612e-148
gene107384	-3.34717	9.53401	7.42806e-148	1.79178e-146
gene109721	-2.93655	4.33136	1.03468e-147	2.48503e-146
gene102959	-3.54076	3.89403	1.31206e-147	3.13763e-146
gene111262	2.47403	8.31347	2.06657e-147	4.92075e-146
gene102955	-4.00824	3.27307	6.36372e-147	1.5088e-145
gene108956	-2.74761	7.84327	1.92165e-146	4.53673e-145
gene107500	-2.28669	5.23736	2.28164e-146	5.36378e-145
gene102985	2.22455	7.32116	3.04269e-146	7.12272e-145
gene102953	-3.26174	3.83433	4.61416e-146	1.0756e-144
gene104770	-2.05669	7.29819	8.93201e-146	2.07342e-144
gene107470	-2.19762	6.03146	5.10645e-145	1.18044e-143
gene103975	2.72255	5.90092	1.01934e-144	2.34659e-143
gene103985	2.80446	6.53773	2.55826e-144	5.86498e-143
gene107188	3.23832	6.71291	4.49615e-144	1.02653e-142
gene108184	-3.09108	4.33082	8.7334e-144	1.98577e-142
gene109489	-5.0392	7.21913	6.19793e-143	1.40352e-141
gene109935	5.40291	3.39831	8.00923e-143	1.80631e-141
gene110264	-2.55887	7.27685	5.57525e-142	1.25229e-140
gene107714	-2.31733	4.95764	8.96394e-142	2.00532e-140
gene103753	-2.12395	6.94922	1.01811e-141	2.26846e-140
gene108896	-3.00327	10.3326	1.97666e-140	4.38659e-139
gene107506	-2.17914	6.46662	5.70759e-139	1.26158e-137
gene112046	-3.34603	5.29984	4.38359e-138	9.65086e-137
gene103429	-3.03435	6.04855	1.81024e-137	3.96964e-136
gene106648	-2.01131	5.31945	4.69755e-137	1.02606e-135
gene107502	-2.07024	5.85809	1.06544e-136	2.31807e-135
gene105100	-2.0793	5.48905	5.22537e-136	1.13244e-134
gene102823	2.46894	6.67713	5.70181e-136	1.23088e-134
gene108158	-2.51643	5.21247	1.35769e-134	2.91957e-133
gene103063	2.41215	6.0509	1.51279e-134	3.24052e-133
gene111254	-5.69091	9.02751	1.57563e-134	3.36215e-133
gene110272	2.10986	6.11201	2.06965e-134	4.39939e-133
gene105372	-2.51875	4.97537	8.94673e-134	1.89452e-132
gene109477	-5.10719	7.53007	9.36665e-134	1.9759e-132
gene102795	-2.77177	5.9687	2.39718e-133	5.03771e-132
gene111992	-2.35023	5.1544	3.31304e-133	6.93612e-132
gene107924	-2.06541	6.47185	2.39046e-132	4.98582e-131
gene107968	-2.1013	7.87713	3.20143e-132	6.65225e-131
gene109283	-3.11511	6.51809	6.34791e-132	1.31411e-130
gene102915	2.12641	6.93077	2.00511e-131	4.13544e-130
gene107516	-3.97668	3.51527	4.1662e-131	8.56076e-130
gene103911	-2.18202	8.2142	1.09802e-130	2.2479e-129
gene111722	2.71179	7.98868	1.10761e-130	2.2592e-129
gene103677	-2.48556	4.32638	1.3439e-129	2.73112e-128
gene103681	-3.11657	4.27327	1.8877e-128	3.82224e-127
gene113592	-2.0487	6.35313	3.55255e-128	7.16711e-127
gene111078	3.33897	6.80118	1.04992e-127	2.11049e-126
gene106750	-2.37632	5.99816	7.44922e-127	1.49199e-125
gene109711	3.40198	3.80815	9.07056e-127	1.8102e-125
gene113300	-1.88833	7.00751	9.89039e-127	1.96673e-125
gene107786	-2.03304	6.56907	1.07574e-125	2.1315e-124
gene111748	1.95429	7.42556	1.96463e-125	3.87893e-124
gene111258	2.51163	5.117	2.39213e-125	4.70622e-124
gene110274	2.02844	9.40774	3.70285e-125	7.25917e-124
gene107674	-2.92677	4.6783	1.21188e-124	2.36744e-123
gene111850	-1.98607	6.27264	2.23412e-124	4.34909e-123
gene103107	-3.4216	3.86332	2.69966e-124	5.23697e-123
gene107460	-4.67449	3.4908	1.72936e-123	3.34302e-122
gene108220	-2.18379	4.9501	2.03412e-123	3.91851e-122
gene110644	2.21893	6.42972	7.63923e-123	1.46652e-121
gene106912	-3.59234	3.28934	1.38805e-122	2.65548e-121
gene107518	-3.59075	5.87557	1.87115e-122	3.5674e-121
gene106580	-3.67091	3.72555	2.43377e-122	4.62416e-121
gene107100	-2.51671	4.20943	1.64944e-121	3.12324e-120
gene107926	-1.93115	6.70915	2.39811e-121	4.52541e-120
gene104848	-2.54916	8.82447	3.75725e-121	7.06618e-120
gene103971	2.40911	5.25166	4.32797e-121	8.11202e-120
gene107226	-1.89701	6.08268	5.81289e-121	1.08586e-119
gene112692	-1.98029	5.9027	6.75656e-121	1.2579e-119
gene108832	2.47269	6.08733	1.17564e-120	2.18142e-119
gene109547	3.34202	6.03976	1.20462e-120	2.22775e-119
gene110023	2.69024	7.01299	2.52701e-120	4.65776e-119
gene109933	5.30473	3.14059	1.22479e-119	2.25005e-118
gene102909	2.20904	6.73979	1.53109e-119	2.80347e-118
gene107034	1.97515	7.19825	2.28544e-119	4.17093e-118
gene103965	2.71105	4.63341	4.44851e-119	8.09191e-118
gene107466	-4.48394	3.16385	2.07096e-118	3.75479e-117
gene107224	-2.15735	5.47408	4.98404e-118	9.00698e-117
gene109627	-4.15936	2.59926	1.63155e-117	2.93891e-116
gene103019	-1.92523	7.1773	1.54194e-116	2.76851e-115
gene111240	-4.22315	3.95978	4.14925e-116	7.4131e-115
gene113764	1.92541	7.18571	4.1555e-116	7.4131e-115
gene109012	-1.82894	6.94522	6.87204e-116	1.22199e-114
gene103947	-2.40637	8.09737	1.15302e-115	2.04375e-114
gene112716	-2.4813	4.77252	4.38152e-115	7.74162e-114
gene109889	-2.00138	6.43014	1.70105e-114	2.99601e-113
gene103977	2.46369	5.45689	2.24123e-114	3.93493e-113
gene103773	2.45145	7.8073	2.53723e-114	4.44055e-113
gene113904	2.22192	6.80896	2.30118e-113	4.01476e-112
gene106292	-1.66775	5.73456	3.90941e-113	6.79919e-112
gene110618	-2.88455	3.37828	4.40754e-113	7.64158e-112
gene103973	2.94206	4.67859	1.16237e-111	2.00898e-110
gene112062	-2.35962	9.18788	6.46318e-111	1.11359e-109
gene104346	-2.53	4.50041	1.37877e-110	2.36825e-109
gene103775	2.40551	10.7701	1.86328e-110	3.19058e-109
gene111230	-2.28515	5.3367	1.90982e-110	3.26021e-109
gene113344	-2.32707	5.47801	2.06192e-110	3.50906e-109
gene111268	2.45344	5.59244	3.84365e-110	6.52128e-109
gene109867	1.92868	7.79203	3.88223e-110	6.56665e-109
gene104454	-2.56048	4.05681	4.71495e-110	7.95092e-109
gene110976	-2.22233	4.90539	6.55491e-110	1.10202e-108
gene113946	-1.86424	6.57027	8.4327e-110	1.41343e-108
gene112690	-3.02381	3.22418	9.57151e-110	1.59948e-108
gene107528	-2.99417	3.85792	1.06536e-109	1.77495e-108
gene104314	-2.35247	9.76183	5.93975e-108	9.86638e-107
gene105818	-2.34359	4.117	7.48667e-108	1.23988e-106
gene103951	-2.15882	5.98984	9.30944e-108	1.53717e-106
gene107608	-2.62425	3.99394	9.75296e-108	1.60562e-106
gene113478	1.91957	7.95715	1.6426e-107	2.69619e-106
gene108624	-2.89259	3.30376	3.08044e-107	5.04138e-106
gene108330	-2.01329	5.27792	3.1057e-107	5.06776e-106
gene104344	-1.82089	5.19656	3.40085e-107	5.53311e-106
gene111272	2.67789	8.42501	3.52526e-107	5.71875e-106
gene111232	-2.41896	5.45517	9.45019e-107	1.52856e-105
gene107740	1.91619	6.97434	1.05947e-106	1.7087e-105
gene112688	-3.00825	3.31463	5.95802e-106	9.58119e-105
gene112704	2.36022	9.21123	6.16642e-106	9.88766e-105
gene105038	-1.82967	5.95004	1.26634e-105	2.02469e-104
gene105300	-3.55169	2.88963	1.88556e-105	3.00606e-104
gene110620	-3.07385	3.25981	2.50272e-105	3.97854e-104
gene108620	-3.0886	3.32825	2.88628e-105	4.57516e-104
gene110642	1.92988	5.73393	4.99891e-105	7.9014e-104
gene107858	1.86624	7.56828	5.59242e-105	8.81441e-104
gene104021	2.23163	7.23742	6.09736e-105	9.58305e-104
gene103987	2.36854	5.76108	8.04837e-105	1.26137e-103
gene103755	2.63356	6.98696	2.12508e-104	3.32111e-103
gene108318	1.69636	7.16801	3.17968e-104	4.95529e-103
gene107458	-4.52135	3.72932	5.17213e-104	8.0378e-103
gene113314	-2.13259	6.61194	6.39474e-104	9.91006e-103
gene102957	-3.70153	3.29646	1.00474e-103	1.55273e-102
gene110840	1.90775	6.88699	1.01106e-103	1.55815e-102
gene102903	2.02886	9.66874	2.47025e-103	3.79639e-102
gene108630	2.08786	5.11848	4.34132e-103	6.6535e-102
gene105304	-2.89625	3.35382	5.94362e-103	9.08407e-102
gene104011	2.39894	6.83052	1.52366e-102	2.32233e-101
gene111270	2.60819	8.55695	4.10178e-102	6.23471e-101
gene111846	-2.1728	5.64895	5.31268e-102	8.0532e-101
gene107180	-1.6285	5.9601	1.92564e-101	2.91102e-100
gene106914	-3.34798	3.39916	8.05213e-101	1.21395e-99
gene109473	-4.63896	7.49624	1.11283e-100	1.67316e-99
gene107360	-1.9677	7.73669	1.95254e-100	2.92775e-99
gene107392	-1.89739	6.54441	2.40226e-100	3.59239e-99
gene107178	-1.61098	7.16433	5.87411e-100	8.76064e-99
gene104580	2.55035	4.70492	7.98413e-100	1.18756e-98
gene110574	3.12106	5.09412	1.08483e-99	1.60926e-98
gene109479	-5.07031	8.49228	5.52032e-99	8.16713e-98
gene106922	-1.75521	7.56039	9.35404e-99	1.38022e-97
gene107958	-1.6748	7.82587	5.87566e-98	8.64673e-97
gene111724	2.15637	6.89284	1.37673e-97	2.02066e-96
gene106608	-3.03342	2.75483	1.74595e-97	2.55581e-96
gene103913	-2.13192	8.60801	1.3543e-96	1.97728e-95
gene106924	-2.09987	5.50304	6.50911e-96	9.47836e-95
gene103867	-2.04468	4.96503	1.55919e-95	2.26451e-94
gene113312	-2.5215	3.6033	2.43036e-95	3.52052e-94
gene110792	-2.32191	4.61186	5.2618e-95	7.6022e-94
gene102941	-2.64021	3.602	6.60455e-95	9.51742e-94
gene111848	-2.06696	6.16903	1.76992e-94	2.54392e-93
gene110141	3.00416	3.44338	3.82102e-94	5.47778e-93
gene110570	2.36527	5.70116	4.24969e-94	6.07662e-93
gene103915	-2.08872	10.8714	1.12169e-93	1.59978e-92
gene104017	2.15941	5.18459	1.57795e-93	2.24473e-92
gene112068	1.83808	5.9952	2.8218e-93	4.00392e-92
gene104734	-2.58786	6.81453	5.55949e-93	7.86838e-92
gene111884	-1.79386	9.95337	7.22829e-93	1.02042e-91
gene111108	-3.58516	3.0371	1.18232e-92	1.66486e-91
gene102907	2.00347	5.23363	1.44009e-92	2.02269e-91
gene106540	-1.70485	6.17541	3.47029e-90	4.8619e-89
gene103979	1.81872	7.34794	5.35076e-90	7.47759e-89
gene109639	-3.14921	2.52936	8.31281e-90	1.15878e-88
gene111750	1.66346	8.26019	5.55055e-89	7.7179e-88
gene103317	-1.52135	5.93916	1.17658e-88	1.63191e-87
gene112532	-1.71738	6.7974	1.32745e-88	1.83658e-87
gene104904	1.86016	8.60283	2.21776e-88	3.06073e-87
gene111746	1.56646	7.44376	2.76299e-88	3.80373e-87
gene105972	2.37515	4.19596	3.16926e-88	4.35225e-87
gene109008	-1.51053	6.27842	3.95468e-88	5.41743e-87
gene110568	2.29367	5.16229	1.09816e-87	1.50064e-86
gene108214	-1.96971	4.96028	1.12327e-87	1.53118e-86
gene111252	-5.36265	2.11188	1.13679e-87	1.54581e-86
gene113236	-3.06053	4.08952	1.41401e-87	1.91807e-86
gene102913	1.88857	7.98698	5.8708e-87	7.94419e-86
gene111088	2.63775	6.19592	7.90911e-87	1.06763e-85
gene108622	-3.13981	3.76939	1.05581e-86	1.42175e-85
gene103203	-2.51647	3.26391	1.17135e-86	1.57352e-85
gene107734	-1.6094	5.28962	1.41614e-86	1.89776e-85
gene110842	1.54107	7.18606	1.75817e-86	2.35044e-85
gene109471	-4.3346	10.0427	3.32842e-86	4.43896e-85
gene107298	-1.56292	6.21394	5.36471e-86	7.13751e-85
gene112686	-2.61477	3.4315	2.53993e-85	3.37118e-84
gene110262	1.83305	6.85338	2.85891e-85	3.7855e-84
gene113096	1.69385	7.5024	4.53041e-85	5.98445e-84
gene109000	-1.55844	5.76658	5.08179e-85	6.69686e-84
gene107504	-1.99383	4.18025	1.53101e-84	2.01281e-83
gene107856	1.67428	5.92394	2.95826e-84	3.88001e-83
gene103109	-2.4373	3.51764	8.41244e-84	1.10076e-82
gene103467	-2.26664	4.377	1.04188e-83	1.36009e-82
gene106226	-1.7609	7.11536	1.12777e-83	1.46875e-82
gene105362	2.33898	5.20132	1.58937e-83	2.06506e-82
gene113474	1.90215	8.84757	2.82139e-83	3.65726e-82
gene112660	-2.35534	3.74344	5.86956e-83	7.59075e-82
gene110075	-1.72979	7.26573	1.41384e-82	1.82418e-81
gene104822	-2.01668	4.58229	1.94852e-82	2.50821e-81
gene112702	2.52839	8.10935	1.01428e-81	1.3026e-80
gene111054	-1.51658	7.34371	1.48141e-81	1.89812e-80
gene110388	1.64726	6.79916	2.00303e-81	2.56055e-80
gene111236	-2.23098	4.77292	2.49062e-81	3.17654e-80
gene103705	-1.62122	6.21859	2.64032e-81	3.35975e-80
gene108702	1.7052	9.02937	9.21912e-81	1.17043e-79
gene103963	2.87343	3.55411	1.26053e-80	1.59667e-79
gene102989	2.10292	5.40326	1.61513e-80	2.04117e-79
gene108154	1.87016	8.70198	2.5918e-80	3.26802e-79
gene111844	-1.61367	6.01788	4.17228e-80	5.24894e-79
gene105578	1.58552	5.66204	2.6246e-79	3.2944e-78
gene113742	2.55664	9.96231	2.70845e-79	3.39198e-78
gene104157	-1.58043	5.36805	5.03049e-79	6.28585e-78
gene106600	-2.474	3.07262	6.66811e-79	8.3134e-78
gene104546	1.59942	8.37106	6.12891e-78	7.62403e-77
gene105302	-3.2985	3.47037	1.02972e-77	1.27805e-76
gene111510	-1.54438	5.9718	1.42419e-77	1.7637e-76
gene108476	-1.66766	5.56574	1.6268e-77	2.01013e-76
gene103949	-2.39484	6.74813	3.01249e-77	3.71406e-76
gene103535	-2.36369	8.18669	3.12477e-77	3.84395e-76
gene110398	2.08489	8.92304	8.35244e-77	1.02521e-75
gene107908	-2.28767	3.59398	9.9602e-77	1.21985e-75
gene108316	-1.72332	5.43843	1.25425e-76	1.53272e-75
gene110286	-2.55275	3.61691	1.56197e-76	1.90457e-75
gene108298	1.62515	8.15369	1.6054e-76	1.95324e-75
gene106402	1.62036	6.61938	1.72439e-76	2.09342e-75
gene108688	-1.42301	7.78416	2.02507e-76	2.45307e-75
gene109010	-1.50382	7.94494	2.09721e-76	2.53493e-75
gene111744	1.53961	8.19582	5.16087e-76	6.22446e-75
gene113070	-4.52131	6.50785	1.1111e-75	1.33718e-74
gene112112	1.45842	8.30846	1.47051e-75	1.76588e-74
gene110278	1.70389	6.3347	1.82104e-75	2.1821e-74
gene103967	2.49401	3.98358	2.6778e-75	3.20182e-74
gene109545	2.21325	5.60017	4.72665e-75	5.63946e-74
gene110061	2.36103	5.8145	4.89366e-75	5.82619e-74
gene106682	-1.69194	4.71423	1.11858e-74	1.32888e-73
gene113480	1.50834	8.09804	1.14718e-74	1.35994e-73
gene110696	2.89588	3.20093	1.62536e-74	1.9227e-73
gene111832	-2.09974	6.73181	3.56006e-74	4.20239e-73
gene107530	-2.27512	3.51216	1.13559e-73	1.33763e-72
gene106828	-1.97924	4.83893	1.30807e-73	1.53754e-72
gene112988	-2.35714	3.89068	2.10282e-73	2.46648e-72
gene112268	-1.67126	6.40166	2.2346e-73	2.61552e-72
gene103989	2.16301	7.50414	4.55673e-73	5.32226e-72
gene103537	-2.05238	8.15314	1.16595e-72	1.35897e-71
gene111242	-5.23362	7.86279	1.33908e-72	1.55749e-71
gene104550	1.50882	8.31148	1.36499e-72	1.5843e-71
gene105466	-2.3872	2.79517	1.37374e-72	1.59113e-71
gene107624	-1.85753	6.19267	1.39468e-72	1.61201e-71
gene108228	-1.95472	4.11989	1.62322e-72	1.87227e-71
gene110552	-1.8441	7.99159	1.89011e-72	2.17559e-71
gene102911	2.14971	5.51288	8.04632e-72	9.24244e-71
gene112420	-1.45492	7.01015	9.429e-72	1.08083e-70
gene103259	1.56588	5.42222	1.03147e-71	1.17992e-70
gene104211	2.65663	5.28114	1.04086e-71	1.18821e-70
gene104820	-1.61711	6.04856	1.4614e-71	1.66485e-70
gene106092	1.62691	5.71121	1.87105e-71	2.12717e-70
gene105474	-2.0933	4.49375	1.985e-71	2.2521e-70
gene104237	-1.32068	6.06433	2.26822e-71	2.56818e-70
gene103757	2.10049	6.34839	4.48505e-71	5.06784e-70
gene108280	-3.24311	3.75798	7.36745e-71	8.30785e-70
gene113414	1.52307	6.41281	8.68996e-71	9.77929e-70
gene111494	1.60221	7.96142	1.12277e-70	1.26095e-69
gene111508	-1.45891	5.28651	1.12785e-70	1.2641e-69
gene105794	-1.58492	5.44465	1.65157e-70	1.84736e-69
gene106242	-1.54842	5.46473	1.8715e-70	2.08915e-69
gene103305	2.41751	3.58227	2.41883e-70	2.69472e-69
gene106528	-1.84582	5.40823	4.49287e-70	4.99528e-69
gene109859	-2.7565	3.01353	4.93355e-70	5.47427e-69
gene106004	-1.56747	8.26683	5.67746e-70	6.28713e-69
gene109439	-1.84525	5.08498	5.91517e-70	6.53732e-69
gene106532	-1.72271	4.85532	6.27803e-70	6.92455e-69
gene107308	1.81355	5.17066	7.35496e-70	8.09629e-69
gene106556	-1.88971	4.94821	7.76584e-70	8.53166e-69
gene109723	-1.44138	6.67682	1.07254e-69	1.17598e-68
gene102905	1.38833	6.59016	1.24818e-69	1.36586e-68
gene106640	-2.15773	5.77161	1.76092e-69	1.92315e-68
gene113482	1.48573	9.48842	2.46295e-69	2.68457e-68
gene106236	-1.64115	5.36252	2.64775e-69	2.88034e-68
gene106520	-2.44859	3.32753	5.9134e-69	6.42026e-68
gene103503	-1.73401	4.42256	7.12197e-69	7.71732e-68
gene110282	1.39942	7.55165	1.08107e-68	1.16916e-67
gene108670	-2.32272	4.80084	1.16956e-68	1.26239e-67
gene106574	2.51541	4.36181	1.88457e-68	2.03022e-67
gene104015	1.91665	5.25857	4.03928e-68	4.34221e-67
gene110195	-1.53827	5.37375	4.04636e-68	4.34221e-67
gene113288	1.4193	6.02309	8.28226e-68	8.87066e-67
gene134060	1.47472	8.11603	1.10362e-67	1.17975e-66
gene111504	1.71289	9.1325	1.20143e-67	1.28183e-66
gene111260	2.00749	4.73308	2.93646e-67	3.12696e-66
gene112484	1.97989	5.03423	3.78478e-67	4.0226e-66
gene109969	1.79326	7.35963	4.64491e-67	4.92734e-66
gene106456	1.87194	7.35516	5.32178e-67	5.63459e-66
gene105032	1.90996	4.91527	7.61862e-67	8.04937e-66
gene107742	1.4262	6.21974	7.63152e-67	8.04937e-66
gene106454	1.99604	5.50741	1.02589e-66	1.08001e-65
gene103995	2.12096	5.47405	1.32997e-66	1.39748e-65
gene111574	-1.26413	6.01061	1.35461e-66	1.42068e-65
gene112684	-1.89759	3.75199	1.85744e-66	1.94436e-65
gene110578	1.56782	7.2908	2.39367e-66	2.50096e-65
gene108574	-1.51454	5.91607	3.59213e-66	3.74608e-65
gene106752	-1.90806	4.90522	3.93124e-66	4.09203e-65
gene111606	-2.15825	3.4745	4.16749e-66	4.32982e-65
gene108188	-1.96385	3.78367	5.09325e-66	5.28175e-65
gene110386	1.29626	6.42261	1.71588e-65	1.77606e-64
gene106066	-1.47904	4.87568	2.05045e-65	2.11842e-64
gene105630	-1.60958	7.38053	3.88573e-65	4.00707e-64
gene104059	-1.44684	7.72638	6.09048e-65	6.26902e-64
gene111256	1.91526	5.94576	8.60481e-65	8.84064e-64
gene107702	1.51707	10.0887	1.18424e-64	1.21445e-63
gene112984	-1.41898	5.62841	1.64065e-64	1.6794e-63
gene109004	-1.53203	6.05252	1.7332e-64	1.77087e-63
gene111678	1.64375	8.26446	3.05913e-64	3.11986e-63
gene104548	1.42814	8.05654	3.79342e-64	3.86163e-63
gene107728	-1.54447	4.97327	7.02767e-64	7.14093e-63
gene107328	-2.53896	3.6054	1.00892e-63	1.02331e-62
gene108338	1.64845	5.28106	1.20516e-63	1.22011e-62
gene105104	-3.77102	2.38024	1.27388e-63	1.28734e-62
gene112161	-1.24129	7.20017	2.70451e-63	2.72811e-62
gene102921	1.64307	5.83451	2.92754e-63	2.94772e-62
gene110628	-1.22163	6.33475	4.33508e-63	4.35707e-62
gene106760	-1.75893	4.42752	4.91629e-63	4.93229e-62
gene107358	-1.34711	5.23131	5.61082e-63	5.61892e-62
gene106500	-1.58617	4.85701	7.32962e-63	7.32698e-62
gene103303	2.25407	5.2113	8.23023e-63	8.21247e-62
gene103991	1.63253	5.37737	1.01682e-62	1.0128e-61
gene113976	-1.42468	8.43282	1.23437e-62	1.22729e-61
gene111578	-1.95711	10.4097	2.61558e-62	2.59593e-61
gene112552	1.62182	8.99455	2.794e-62	2.76805e-61
gene109014	-1.48176	8.2802	2.9591e-62	2.9264e-61
gene103969	1.51531	5.75088	3.46579e-62	3.42139e-61
gene109709	3.45303	2.55211	3.48642e-62	3.43565e-61
gene105158	-2.17371	4.72913	3.76399e-62	3.70259e-61
gene112682	-1.82079	3.51439	5.80913e-62	5.70426e-61
gene109655	-1.85435	6.70437	6.67246e-62	6.54043e-61
gene109277	-1.72852	4.66524	9.49064e-62	9.28643e-61
gene107922	-1.53952	5.50172	1.61886e-61	1.58123e-60
gene108628	3.78315	1.83381	1.67412e-61	1.63234e-60
gene104019	2.13045	5.14444	2.51128e-61	2.44431e-60
gene107544	-1.39748	8.19527	4.61674e-61	4.48576e-60
gene108144	-1.55423	6.42962	4.84292e-61	4.69729e-60
gene111534	1.85022	9.40728	7.15938e-61	6.93198e-60
gene102969	-1.45265	5.05931	1.3238e-60	1.27952e-59
gene107970	-2.47227	3.93892	1.35937e-60	1.31162e-59
gene108356	-2.71388	2.86953	3.52053e-60	3.39095e-59
gene108572	-1.34505	5.49349	6.46433e-60	6.21562e-59
gene107860	1.26727	6.59665	7.23993e-60	6.94934e-59
gene106116	1.82867	9.31029	9.69519e-60	9.28996e-59
gene104326	-1.68447	5.16529	1.1728e-59	1.12185e-58
[truncated: 4,968 more rows]

## Sheet: DEG_LB9_versus_Mix_FC2_FDR5.txt
geneID	gene Name	logFC	logCPM	PValue	FDR
[truncated: 1,421 more rows]

[truncated: 2 more sheets: FC_all_genes_LB7_vers_LB9, DEG_LB7_versus_LB9_FC2_FDR5.txt]
